# Supplementary material for: Genomic perspective on the bacillus causing paratyphoid B fever
Source: Research Square preprint supplement (doi:10.21203/rs.3.rs-4502330/v1), 2024-06-18
Supplement: Supplementary file 2 [file 27399650bca3dc2629ff9317.xlsx]

## Sheet: Data 9
		Coverage ratios when short reads are mapped to CP147902*			Occupency of sopE-prophage insertion sites (from blast on assemblies)**									Occupency of non-sopE-prophage insertion sites (from blast on assemblies)**
RaXML-order	Strain name	cov_s/ cov_pi	cov_s/ cov_g	sopE-CN	site-1	site-2	site-3	Notes on insertion	#sopE-prophage	sopE-prophage pattern (SPP) ***	Phage type	Sequencing plateform	{Hin_FljB_FljA} cluster	siteA	siteB	siteBprim	siteC	siteD	siteE	siteF
1	NCTC 8299	1.66	1.96	1.81	ins	none	none		one	site-1	Not available	HiSeq	presence	PP1	none	none	none	none	none	none
2	63-90	0.86	0.95	0.905	ins	none	none		one	site-1	Beccles	HiSeq	presence	PP1	none	ins	none	none	none	none
3	42-88	0.92	1.06	0.99	ins	none	none		one	site-1	RDNC	HiSeq	presence	PP1	none	none	none	none	none	none
4	173-73	0	0	0	none	none	none		zero	none	1	HiSeq	presence	PP1	none	none	ins	none	none	none
5	CIP 106224	0.6	0.37	0.485	ins	none	none		one	site-1	Not available	NextSeq	presence	PP1	none	none	ins	none	none	none
6	52-76	0.56	0.32	0.44	ins	none	none		one	site-1	1	NextSeq	presence	PP1	none	none	ins	none	none	none
7	167-76	0.58	0.3	0.44	ins	none	none		one	site-1	Non typable	NextSeq	presence	PP1	none	none	ins	none	none	none
8	37-73	0.73	0.41	0.57	ins	none	none		one	site-1	1	NextSeq	presence	PP7else	none	none	ins	none	none	none
9	102-66	0.51	0.32	0.415	ins	none	none		one	site-1	1	NextSeq	presence	PP1	none	none	ins	none	none	none
10	18-67	0.36	0.17	0.265	ins	none	none		one	site-1	1	NextSeq	presence	PP1	none	none	ins	none	none	none
11	22-73	0.67	0.33	0.5	ins	none	none		one	site-1	1	NextSeq	presence	PP1	none	none	ins	none	none	none
12	ATCC 10719	2.36221	2.7459	2.55406	ins	none	ins		two	sites-1-3	Not available	454GS	presence	PP1	none	none	ins	none	none	none
13	CIP 54.103	0.4	0.31	0.355	ins	none	none		one	site-1	1	NextSeq	presence	PP1	none	none	ins	none	none	none
14	SH15G2070	0.92	0.93	0.925	ins	none	none		one	site-1	Not available	HiSeq	presence	FljB_noPP	none	none	none	none	none	none
15	493366	1.17	1.23	1.2	ins	none	none		one	site-1	Not available	HiSeq	presence	PP1	none	none	ins	ins	none	none
16	SMG-20-979	0.62	0.43	0.525	ins	none	none		one	site-1	Not available	MiSeq	presence	PP1	none	none	none	none	none	none
17	SMG-20-968	0.84	0.79	0.815	ins	none	none		one	site-1	Dundee	MiSeq	presence	PP1	none	none	none	none	none	none
18	SL210010	0.93	0.91	0.92	ins	none	none		one	site-1	Not available	MiSeq	presence	PP1	none	none	ins	none	none	none
19	SH16G3159	0.9	0.87	0.885	ins	none	none		one	site-1	Not available	HiSeq	presence	PP1	none	none	ins	none	none	none
20	B309	0.63	0.44	0.535	ins	none	none		one	site-1	1	NextSeq	presence	PP1	none	none	ins	none	none	none
21	2-57	1.5	1.64	1.57	ins	none	none		one	site-1	Not available	HiSeq	presence	PP1	none	none	none	none	none	none
22	524183	1.29	1.57	1.43	ins	none	none		one	site-1	Not available	HiSeq	presence	PP1	none	none	none	none	none	none
23	416382	1.46	1.75	1.605	ins	none	none		one	site-1	Not available	HiSeq	presence	PP1	none	none	none	none	none	none
24	SH11G0446	1	0.91	0.955	ins	none	none		one	site-1	Not available	HiSeq	presence	PP1	ins	none	none	none	none	none
25	CIP 54.100	0.86	0.92	0.89	ins	none	none		one	site-1	2	HiSeq	presence	PP1	ins	none	ins	none	ins	none
26	B73-1117	0.66	0.49	0.575	ins	none	none		one	site-1	1	NextSeq	presence	PP1	none	none	ins	none	none	none
27	B76	0.8	0.61	0.705	ins	none	none		one	site-1	1	NextSeq	presence	PP1	none	none	ins	none	none	none
28	72-66	0.8	0.88	0.84	ins	none	none		one	site-1	1	HiSeq	presence	PP1	none	none	none	none	none	none
29	76-2469	0.62	0.46	0.54	ins	none	none		one	site-1	Not available	NextSeq	presence	PP1	none	none	ins	none	none	none
30	200107858	0.71	0.31	0.51	ins	none	none		one	site-1	1	NextSeq	presence	PP1	none	none	ins	ins	none	none
31	06-6420	1.02	0.91	0.965	ins	none	none		one	site-1	Not available	HiSeq	presence	PP1	none	none	ins	none	none	none
32	41977	0.91	0.91	0.91	ins	none	none		one	site-1	RDNC	HiSeq	presence	PP1	none	none	ins	none	none	none
33	1125478	1.41	1.27	1.34	ins	none	none		one	site-1	1	HiSeq	presence	PP1	none	none	ins	none	none	none
34	H93680197	1.25	1.41	1.33	ins	none	none		one	site-1	Dundee	HiSeq	presence	PP2_PP7	none	none	none	none	none	none
35	SH14SF018	0.86	0.85	0.855	ins	none	none		one	site-1	Not available	HiSeq	presence	PP7else	none	none	none	none	none	none
36	CIP A214	1.03	1.09	1.06	ins	none	none		one	site-1	Not available	HiSeq	absence	NoFljB	none	none	none	ins	none	none
37	1190=221K+222K	1.1	1.13	1.115	ins	none	none		one	site-1	Not available	HiSeq	absence	NoFljB	none	none	none	none	none	none
38	138-75	2.03	2.26	2.145	ins	none	ins		two	sites-1-3	3a	HiSeq	presence	PP2_PP7	none	none	none	none	none	none
39	MS160191	2.71	2.38	2.545	ins	none	ins		two	sites-1-3	Not available	HiSeq	presence	PP2_PP7	none	none	none	none	none	none
40	NCTC 20180	2.15	2.49	2.32	ins	none	ins		two	sites-1-3	Not available	HiSeq	absence	NoFljB	none	none	none	none	none	none
41	28-67	1.15	1.28	1.215	none	ins	none		one	site-2	Not available	HiSeq	presence	PP2_PP7	none	none	none	none	none	ins
42	SL210015	0.96	1	0.98	none	ins	none		one	site-2	Not available	MiSeq	presence	PP2	none	none	none	ins	none	ins
43	SL210004	0.89	0.87	0.88	none	ins	none		one	site-2	Not available	MiSeq	presence	PP2	none	none	none	ins	none	ins
44	SL210002	0.95	0.97	0.96	none	ins	none		one	site-2	Not available	MiSeq	presence	PP2	none	none	none	ins	none	ins
45	SL210028	1.04	1	1.02	none	ins	none		one	site-2	Not available	MiSeq	presence	PP2	none	none	none	ins	none	ins
46	SL210024	0.96	0.86	0.91	none	ins	none		one	site-2	Not available	MiSeq	presence	PP2	none	none	none	ins	none	ins
47	SPPI_33	0.79	0.37	0.58	none	ins	none		one	site-2	Not available	NextSeq	presence	PP2	none	none	#8296ab	ins	none	ins
48	CIP 106246	1.19	0.78	0.985	ins	ins	none		two	sites-1-2	Not available	NextSeq	presence	PP2	none	none	none	none	none	ins
49	116K	0.67	0.34	0.505	ins	ins	none		two	sites-1-2	Not available	NextSeq	presence	PP2	none	none	none	ins	none	ins
50	7K	0.84	0.33	0.585	none	ins**	none	insertion blast site-2 differs from general case	one	site-2	3a	NextSeq	presence	FljB_noPP	none	none	none	ins	none	ins
51	748852	0.87	1.06	0.965	ins	none**	none	huge deletion between the genes btsT and mdoB/opgB which likely reflects a deletion of a formely inserted prophage. The coverage analysis suggests that SopE is single copy.	one	site-1***	Not available	HiSeq	presence	PP2_PP7	none	none	none	none	none	none
52	SH16G0260	1.96	1.84	1.9	ins**	ins	none	insertion blast site-1 differs from general case	two	sites-1-2	Not available	HiSeq	presence	PP2_PP7	none	none	none	none	none	none
53	SH16SF1222	2.12	1.91	2.015	ins**	ins	none	insertion blast site-1 differs from general case	two	sites-1-2	Not available	HiSeq	presence	PP2_PP7	none	none	none	none	none	none
54	17-87	1.22	0.82	1.02	none	ins	ins		two	sites-2-3	3aI	NextSeq	presence	PP2	none	none	none	ins	none	ins
55	B624	1.49	1.07	1.28	none	ins	ins		two	sites-2-3	3aI	NextSeq	presence	PP2	none	none	none	ins	none	ins
56	77-1018	2.36	0.95	1.655	none	ins	ins		two	sites-2-3	Not available	NextSeq	presence	PP2	none	none	none	ins	none	none
57	CIP 106229	1.43	0.98	1.205	none	ins	ins		two	sites-2-3	Not available	NextSeq	presence	PP2	none	none	none	ins	none	ins
58	NCTC 20182	2.12	2.43	2.275	none	ins	ins		two	sites-2-3	Not available	HiSeq	presence	PP2	none	none	none	ins	none	ins
59	NCTC 20183	2.25	2.57	2.41	none	ins	ins		two	sites-2-3	Not available	HiSeq	presence	PP7else	none	none	none	ins	none	ins
60	NCTC 20232	2.16	2.34	2.25	none	ins	ins		two	sites-2-3	Not available	HiSeq	presence	PP2	none	none	none	ins	none	ins
61	CIP 54.105	0.5	0.37	0.435	ins	none	none		one	site-1	Beccles	NextSeq	presence	PP2	none	none	none	ins	none	none
62	12-80	0.77	0.38	0.575	none	ins	none		one	site-2	Taunton	NextSeq	presence	PP2	none	none	none	ins	none	none
63	20_PB-J	1.17	1.26	1.215	none	ins	none		one	site-2	Not available	HiSeq	presence	PP2	none	none	none	ins	none	none
64	5-63	2	0.96	1.48	none	ins	ins		two	sites-2-3	3aI	NextSeq	presence	PP2	none	none	none	ins	none	none
65	DB 7403	2.44	2.69	2.565	none	ins	ins		two	sites-2-3	Not available	HiSeq	presence	PP2	none	none	none	ins	none	none
66	BAS 9	1.1	1.21	1.155	none	ins	none		one	site-2	Not available	HiSeq	presence	PP2	none	none	none	ins	none	none
67	6198	1.14	1.2	1.17	none	ins	none		one	site-2	Not available	HiSeq	presence	PP2	none	none	none	ins	none	none
68	7020	1.11	1.29	1.2	none	ins	none		one	site-2	Not available	HiSeq	presence	PP2	none	none	none	ins	none	none
69	CFSAN024725	NA	NA	NA	none	ins	none			site-2	Not available		presence	PP2	none	none	none	ins	none	none
70	CMF 6999	1	1.06	1.03	ins	none	none		one	site-1	Not available	HiSeq	presence	PP2	none	none	none	ins	none	none
71	CLA-76-5	1.09	1.11	1.1	none	ins	none		one	site-2	Not available	MiSeq	presence	PP2	none	none	none	ins	none	none
72	RML 7856	1.2	1.33	1.265	none	ins	none		one	site-2	Not available	HiSeq	presence	PP2	none	none	none	ins	none	none
73	18-88	1.27	1.38	1.325	none	ins	none		one	site-2	RDNC	HiSeq	presence	PP2	none	none	none	ins	none	none
74	5644	1.09	1.33	1.21	none	ins	none		one	site-2	Not available	HiSeq	presence	PP2	none	none	none	ins	none	none
75	MNZ 6203	1.26	1.46	1.36	none	ins	none		one	site-2	Not available	HiSeq	presence	PP2	none	none	none	none	none	none
76	PMP 2097	1.08	1.18	1.13	none	ins	none		one	site-2	Not available	HiSeq	presence	PP2	none	none	none	ins	none	none
77	4695/84	0.6	0.42	0.51	none	ins	none		one	site-2	Not available	NextSeq	presence	PP2	none	none	none	ins	none	none
78	MATAQ-77-5	1.04	1.08	1.06	none	ins	none		one	site-2	Not available	MiSeq	presence	PP2	none	none	none	ins	none	none
79	3K	0.99	1.05	1.02	none	ins	none		one	site-2	Not available	HiSeq	presence	PP2	none	none	none	none	none	none
80	11-70	1.18	1.29	1.235	none	ins	none		one	site-2	3a	HiSeq	presence	PP2	none	none	none	none	none	none
81	SH10G638	1.14	1.08	1.11	none	ins	none		one	site-2	Not available	HiSeq	presence	PP2	none	none	none	none	none	none
82	B62	0.58	0.4	0.49	none	ins	none		one	site-2	3a	NextSeq	presence	PP2	none	none	none	none	none	none
83	SARA42	0.9	1.05	0.975	none	ins	none		one	site-2	Not available	HiSeq	presence	PP2_PP7	none	none	none	none	none	none
84	SL210022	1.02	0.95	0.985	none	ins	none		one	site-2	Not available	MiSeq	presence	PP2	none	none	none	none	none	none
85	B397	0.56	0.32	0.44	none	ins	none		one	site-2	Not available	NextSeq	presence	PP2_PP7	none	none	none	none	none	none
86	B97	0.65	0.32	0.485	none	ins	none		one	site-2	3b	NextSeq	presence	PP2_PP7	none	none	none	none	none	none
87	SL210005	1.06	1.05	1.055	none	ins	none		one	site-2	Not available	MiSeq	presence	FljB_noPP	none	none	none	none	none	none
88	SL210003	1.01	1.05	1.03	none	ins	none		one	site-2	Not available	MiSeq	presence	PP2	none	none	none	none	none	none
89	SL210006	0.86	0.85	0.855	none	ins	none		one	site-2	Not available	MiSeq	presence	PP2	none	none	none	none	none	none
90	SL210011	1.03	0.98	1.005	none	ins	none		one	site-2	Not available	MiSeq	presence	PP2	none	none	none	none	none	none
91	SL210013	0.95	0.97	0.96	none	ins	none		one	site-2	Not available	MiSeq	presence	PP2	none	none	none	none	none	none
92	SL210014	0.98	0.97	0.975	none	ins	none		one	site-2	Not available	MiSeq	presence	PP2	none	none	none	none	none	none
93	SL210009	0.87	0.86	0.865	none	ins	none		one	site-2	Not available	MiSeq	presence	PP2	none	none	none	none	none	none
94	SL210023	0.71	0.62	0.665	none	ins	none		one	site-2	Not available	MiSeq	presence	PP2	none	none	none	none	none	none
95	SL210021	1.26	1.22	1.24	none	ins	none		one	site-2	Not available	MiSeq	presence	PP2	none	none	none	none	none	none
96	SL210019	1.14	1.12	1.13	none	ins	none		one	site-2	Not available	MiSeq	presence	PP2	none	none	none	none	none	none
97	SL210020	1.2	1.19	1.195	none	ins	none		one	site-2	Not available	MiSeq	presence	PP2	none	none	none	none	none	none
98	NCTC 20176	1.05	1.17	1.11	none	ins	none		one	site-2	Not available	HiSeq	presence	PP2	none	none	none	ins	none	none
99	73-1900	0.61	0.36	0.485	none	ins	none		one	site-2	Not available	NextSeq	absence	NoFljB	none	none	none	ins	none	none
100	69-0480	0.69	0.5	0.595	none	ins	none		one	site-2	Not available	NextSeq	absence	NoFljB	none	none	none	ins	none	none
101	30-62	0.91	0.69	0.8	ins	ins	none		two	sites-1-2	3b	NextSeq	presence	PP2_PP7	none	none	none	none	none	none
102	NCTC 20196	2.13	2.38	2.255	ins	ins	none		two	sites-1-2	Not available	HiSeq	presence	PP2	none	none	none	none	none	none
103	77-0106	1.61	0.75	1.18	none	ins	none		one	site-2	Not available	NextSeq	absence	NoFljB	none	none	none	ins	none	none
104	6-58	0.8	0.34	0.57	none	ins	none		one	site-2	Beccles	NextSeq	absence	NoFljB	none	none	none	ins	none	none
105	2-58bis	0.59	0.36	0.475	none	ins	none		one	site-2	Jersey	NextSeq	absence	NoFljB	none	none	none	ins	none	none
106	4-58	0.68	0.31	0.495	none	ins	none		one	site-2	Jersey	NextSeq	absence	NoFljB	none	none	none	ins	none	none
107	B91-91	0.77	0.32	0.545	none	ins	none		one	site-2	Jersey	NextSeq	absence	NoFljB	none	none	none	ins	none	none
108	B72-1189	0.73	0.42	0.575	none	ins	none		one	site-2	Beccles	NextSeq	absence	NoFljB	none	none	none	ins	none	none
109	346K	1.09	1.16	1.125	none	ins	none		one	site-2	Not available	HiSeq	absence	NoFljB	none	none	none	ins	none	none
110	248K	0.94	0.98	0.96	ins**	ins	none	Insertion blast site-1 differs from general case;The mapping to B62 and coverage analysis is concordant with the presence of a single copy of SopE gene; The SopE carrier prophage is likely inserted at site-2	two	site-2***	Not available	HiSeq	absence	NoFljB	none	none	none	ins	none	none
111	B66-1071	0.91	0.62	0.765	none	ins	none		one	site-2	Jersey	NextSeq	absence	NoFljB	none	none	none	ins	none	none
112	B66-545	0.48	0.36	0.42	none	ins	none		one	site-2	Not available	NextSeq	absence	NoFljB	none	none	none	ins	none	none
113	B1727	0.65	0.49	0.57	none	ins	none		one	site-2	Beccles	NextSeq	absence	NoFljB	none	none	none	ins	none	none
114	B4182	0.47	0.38	0.425	none	ins	none		one	site-2	Jersey	NextSeq	absence	NoFljB	none	none	none	ins	none	none
115	CIP 54.115	1.09	0.95	1.02	none	ins	none		one	site-2	Jersey	HiSeq	absence	NoFljB	none	none	none	ins	none	none
116	202000832	1.11	0.52	0.815	none	ins	none		one	site-2	Not available	NextSeq	absence	NoFljB	none	none	none	none	none	none
117	202002228	0.81	0.48	0.645	none	ins	none		one	site-2	Not available	NextSeq	absence	NoFljB	none	none	none	ins	none	none
118	34-62	0.52	0.32	0.42	none	ins	none		one	site-2	Beccles	NextSeq	absence	PP7else	none	none	none	ins	none	none
119	95-66	1.14	1.25	1.195	none	ins	none		one	site-2	Beccles	HiSeq	presence	PP2	none	none	none	ins	none	none
120	7-67	1.07	1.26	1.165	none	ins	none		one	site-2	Beccles	HiSeq	presence	PP2	none	none	none	ins	none	none
121	70-89	1.2	1.32	1.26	none	ins	none		one	site-2	Beccles	HiSeq	presence	PP2	none	none	none	none	none	none
122	73-67	0.01	0.01	0.01	none	none	none		zero	none	RDNC	HiSeq	presence	PP2	none	none	none	ins	none	none
123	56-66	0.85	0.94	0.895	ins	none	none		one	site-1	Not available	HiSeq	presence	PP2	none	none	none	ins	none	none
124	200306515	0.52	0.25	0.385	none	ins	none		one	site-2	3aI	NextSeq	presence	PP2	none	none	none	ins	none	none
125	147-75	0.58	0.34	0.46	none	ins	none		one	site-2	3aI	NextSeq	presence	PP2	none	none	none	ins	none	none
126	81-83	0.59	0.28	0.435	none	ins	none		one	site-2	3aI	NextSeq	presence	PP2	none	none	none	ins	none	none
127	SARA41_FB_1	1.13	1.22	1.175	none	ins	none		one	site-2	3a	Genome_Analyzer_II	presence	PP2	none	none	none	ins	none	none
128	201806893	0.68	0.42	0.55	none	ins	none		one	site-2	Not available	NextSeq	presence	PP2	none	none	none	ins	none	none
129	201308236	1.09	1.2	1.145	none	ins	none		one	site-2	Not available	HiSeq	presence	PP2	none	none	none	ins	none	none
130	201905617	0.45	0.2	0.325	none	ins	none		one	site-2	Not available	NextSeq	presence	PP2	none	none	none	ins	none	none
131	SARA44	0.87	1.05	0.96	none	ins	none		one	site-2	Not available	HiSeq	presence	PP2	none	none	none	ins	none	none
132	NCTC 20223	2.47	2.73	2.6	none	ins	ins		two	sites-2-3	Not available	HiSeq	presence	PP2	none	none	none	ins	none	none
133	NCTC 20219	2.23	2.47	2.35	none	ins	ins		two	sites-2-3	Not available	HiSeq	presence	PP2	none	none	none	ins	none	none
134	55-76	1.97	0.95	1.46	none	ins	ins		two	sites-2-3	BAOR	NextSeq	presence	PP2	none	none	none	none	none	none
135	B2227	1.27	0.92	1.095	none	ins	ins		two	sites-2-3	BAOR	NextSeq	presence	PP2	none	none	none	none	none	none
136	201610287	0.73	0.37	0.55	none	ins	ins		two	sites-2-3	Not available	NextSeq	presence	PP2	none	none	none	none	none	none
137	CIP 54.101	1.26	0.97	1.115	none	ins	ins		two	sites-2-3	BAOR	NextSeq	presence	PP2	none	none	none	none	none	none
138	16-67	2.46	2.78	2.62	none	ins	ins		two	sites-2-3	BAOR	HiSeq	presence	PP2	none	none	none	none	none	none
139	201007565	2.91	2.63	2.77	none	ins	ins		two	sites-2-3	Not available	HiSeq	presence	PP2	none	none	none	none	none	none
140	170-75	1.45	0.79	1.12	none	ins	ins		two	sites-2-3	BAOR	NextSeq	presence	PP2	none	none	none	none	none	none
141	85-77	1.94	0.83	1.385	none	ins	ins		two	sites-2-3	BAOR	NextSeq	presence	PP2	none	none	none	none	none	none
142	62-82	2.29	2.61	2.45	none	ins	ins		two	sites-2-3	BAOR	HiSeq	presence	PP2	none	none	none	none	none	none
143	76-2163	1.96	0.98	1.47	none	ins	ins		two	sites-2-3	Not available	NextSeq	presence	PP2	none	none	none	none	none	none
144	B99-6757	1.51	0.58	1.045	none	ins	ins		two	sites-2-3	BAOR	NextSeq	presence	PP2	none	none	none	none	none	none
145	B97-8981	1.48	0.67	1.075	none	ins	ins		two	sites-2-3	BAOR	NextSeq	presence	PP2	none	none	none	none	none	none
146	54-87	2.44	2.72	2.58	none	ins	ins		two	sites-2-3	RDNC	HiSeq	presence	PP2	none	none	none	none	none	none
147	201903854	0.96	0.67	0.815	none	ins	ins		two	sites-2-3	Not available	NextSeq	presence	PP2	none	none	none	none	none	none
148	47-89	2.27	2.54	2.405	none	ins	ins		two	sites-2-3	BAOR	HiSeq	presence	PP2_PP7	none	none	none	none	none	none
149	85-86	1.98	2.2	2.09	none	ins	ins		two	sites-2-3	BAOR	HiSeq	presence	PP2	none	none	none	none	none	none
150	56-85	2.12	2.43	2.275	none	ins	ins		two	sites-2-3	Taunton	HiSeq	presence	PP2	none	none	none	none	none	none
151	56-0045	0.76	0.47	0.615	none	ins	none		one	site-2	Not available	NextSeq	presence	PP2	none	none	none	none	none	none
152	B67-134	1.63	1.12	1.375	ins	ins	none		two	sites-1-2	3b	NextSeq	presence	PP2	none	none	none	none	none	none
153	B66-1060	1.38	1.03	1.205	ins	ins	none		two	sites-1-2	3b	NextSeq	presence	PP2	none	none	none	none	none	none
154	81-67	1.07	1.18	1.125	none	ins	none		one	site-2	3aI	HiSeq	presence	PP2	none	none	none	ins	none	none
155	13-80	0.61	0.26	0.435	ins	none	none		one	site-1	Beccles	NextSeq	presence	PP2	none	none	none	ins	none	none
156	110-76	1.46	0.64	1.05	ins	ins	none		two	sites-1-2	Beccles	NextSeq	presence	PP2	none	none	none	ins	none	none
157	108-76	1.39	0.75	1.07	ins	ins	none		two	sites-1-2	3aI	NextSeq	presence	PP2	none	none	none	ins	none	none
158	47-84	1.45	0.77	1.11	ins	ins	none		two	sites-1-2	Taunton	NextSeq	presence	PP2	none	none	none	none	none	none
159	77-0322	1.47	0.63	1.05	ins	ins	none		two	sites-1-2	Not available	NextSeq	presence	PP2	none	none	none	ins	none	none
160	15-65	0.66	0.39	0.525	none	ins	none		one	site-2	3aI	NextSeq	presence	PP2	none	none	none	ins	none	none
161	SPPI_26	1.37	0.86	1.115	none	ins	ins		two	sites-2-3	Not available	NextSeq	presence	PP2	none	none	none	ins	none	none
162	75-0754	1.66	0.97	1.315	none	ins	ins		two	sites-2-3	Not available	NextSeq	presence	PP2	none	none	none	ins	none	none
163	B60-1917	2.08	2.14	2.11	none	ins	ins		two	sites-2-3	3aI	HiSeq	presence	PP2	none	none	none	ins	none	none
164	CIP 54.104	2.81	2.11	2.46	ins	ins	ins		three	sites-1-2-3	3b	NextSeq	presence	PP2	none	none	none	none	none	none
165	CIP 54.114	2.22	1.73	1.975	ins	ins	ins		three	sites-1-2-3	Dundee	NextSeq	presence	PP2	none	none	none	ins	none	none
166	B64-728	2.59	1.84	2.215	ins	ins	ins		three	sites-1-2-3	3b	NextSeq	presence	PP2	none	none	none	none	none	none
167	4-61	3.17	3.42	3.295	ins	ins	ins		three	sites-1-2-3	Dundee	HiSeq	presence	PP2	none	none	none	ins	none	none
168	1-59	3.82	4.24	4.03	ins	ins	ins		three	sites-1-2-3	Dundee	HiSeq	presence	PP2	none	none	none	ins	none	none
169	202101415	1.82	1.11	1.465	ins	ins	ins		three	sites-1-2-3	Not available	NextSeq	presence	PP2	none	none	none	ins	none	none
170	201808772	0.83	0.58	0.705	none	ins	none		one	site-2	Not available	NextSeq	presence	PP2	none	none	none	none	none	none
171	208-73	2.96	3.37	3.165	ins	ins	ins		three	sites-1-2-3	Dundee	HiSeq	presence	PP2	none	none	none	ins	none	none
172	8-80	2.75	1.24	1.995	ins	ins	ins		three	sites-1-2-3	Dundee	NextSeq	presence	PP2	none	none	none	ins	none	none
173	159-74	2.22	2.44	2.33	ins	ins	none		two	sites-1-2	Beccles	HiSeq	presence	PP2	none	none	none	ins	none	none
174	B91-314	1.99	0.98	1.485	ins	ins	ins		three	sites-1-2-3	Dundee	NextSeq	presence	PP2	none	none	none	ins	none	none
175	57-76	2.64	1.22	1.93	ins	ins	ins		three	sites-1-2-3	Dundee	NextSeq	presence	PP2	none	none	none	ins	none	none
176	2-59	2.46	1.89	2.175	ins	ins	ins		three	sites-1-2-3	Dundee	NextSeq	presence	PP2	none	none	none	ins	none	none
177	9-83	3.03	1.16	2.095	ins	ins	ins		three	sites-1-2-3	Dundee	NextSeq	presence	PP2	none	none	none	ins	none	none
178	B2590	1.73	1.38	1.555	ins	ins	ins		three	sites-1-2-3	Dundee	NextSeq	presence	PP2	none	none	none	ins	none	none
179	82-69	3.27	3.55	3.41	ins	ins	ins		three	sites-1-2-3	Dundee	HiSeq	presence	PP2	none	none	none	ins	none	none
180	201800858	1.63	1.31	1.47	ins	ins	ins		three	sites-1-2-3	Not available	NextSeq	presence	PP2	none	none	none	ins	none	none
181	27-60	3.19	3.48	3.335	ins	ins	ins		three	sites-1-2-3	Dundee	HiSeq	presence	PP2	none	none	none	ins	none	none
182	28-60	2.7	3.25	2.975	ins	ins	ins		three	sites-1-2-3	Dundee	HiSeq	presence	PP2	none	none	none	ins	none	none
183	106-82	3.04	3.24	3.14	ins	ins	ins		three	sites-1-2-3	Dundee	HiSeq	presence	PP2	none	none	none	ins	none	none
184	2-56	3.19	3.58	3.385	ins	ins	ins		three	sites-1-2-3	Dundee	HiSeq	presence	PP2	none	none	none	ins	none	none
185	29-66	3.22	3.46	3.34	ins	ins	ins		three	sites-1-2-3	Dundee	HiSeq	presence	PP2	none	none	none	ins	none	none
186	73-66	2.38	2.67	2.525	none	ins	ins		two	sites-2-3	Dundee	HiSeq	presence	PP2	none	none	none	ins	none	none
187	6-66	2.36	2.6	2.48	none	ins	ins		two	sites-2-3	Dundee	HiSeq	presence	PP2	none	none	none	ins	none	none
188	56-73	2.13	2.47	2.3	ins	ins	none		two	sites-1-2	Beccles	HiSeq	presence	PP2	none	none	none	ins	none	none
189	40-60	0.84	0.93	0.885	ins	ins**	none	The mapping to B62 and coverage analysis is concordant with the presence of a single copy of SopE gene; The SopE carrier prophage is likely inserted at site-1	two	site-1***	Beccles	HiSeq	presence	PP2	none	none	none	none	none	none
190	10-57	3.3	3.6	3.45	ins	ins	ins		three	sites-1-2-3	3b	HiSeq	presence	PP2	none	none	none	none	none	none
191	120-74	2.32	2.5	2.41	ins	ins	none		two	sites-1-2	Beccles	HiSeq	presence	PP2	none	none	none	ins	none	none
192	200800999	2.04	1.11	1.575	ins	ins	ins		three	sites-1-2-3	Not available	NextSeq	presence	PP2	none	none	none	ins	none	none
193	200808918	1.58	1.08	1.33	ins	ins	ins		three	sites-1-2-3	Not available	NextSeq	presence	PP2	none	none	none	ins	none	none
194	60-84	2.66	1.1	1.88	ins	ins	ins		three	sites-1-2-3	Dundee	NextSeq	presence	PP2	none	none	none	none	none	none
195	202107503	3.16	1.59	2.375	ins	ins	ins		three	sites-1-2-3	Not available	NextSeq	presence	PP2	none	none	none	ins	none	none
196	201703686	1.79	0.83	1.31	ins	none	ins		two	sites-1-3	Not available	NextSeq	presence	PP2	none	none	none	ins	none	none
197	20-77	2.36	1.17	1.765	ins	ins	ins		three	sites-1-2-3	Dundee	NextSeq	presence	PP2	none	none	none	ins	none	none
198	62-65	3.18	3.56	3.37	ins	ins	ins		three	sites-1-2-3	Dundee	HiSeq	presence	PP2	none	none	none	ins	none	none
199	21-59	3.05	3.33	3.19	ins	ins	ins		three	sites-1-2-3	Dundee	HiSeq	presence	PP2	none	none	none	none	none	none
200	18-84	2.56	1.33	1.945	ins	ins	ins		three	sites-1-2-3	Dundee	NextSeq	presence	PP2	none	none	none	ins	none	none
201	201600075	0.89	0.49	0.69	ins	ins	none		two	sites-1-2	Not available	NextSeq	presence	PP2	none	none	none	ins	none	none
202	201901362	1.65	0.85	1.25	none	ins	ins		two	sites-2-3	Not available	NextSeq	presence	PP2	none	none	none	ins	none	none
203	5-68	3.15	3.46	3.305	ins	ins	ins		three	sites-1-2-3	Dundee	HiSeq	presence	PP2	none	none	none	ins	none	none
204	84-70	2.8	3.25	3.025	ins	ins	ins		three	sites-1-2-3	Dundee	HiSeq	presence	PP2	none	none	none	ins	none	none
205	27-68	3.18	3.56	3.37	ins	ins	ins		three	sites-1-2-3	Not available	HiSeq	presence	PP2	none	none	none	ins	none	none
206	201904345	1.45	0.54	0.995	ins	ins	none		two	sites-1-2	Not available	NextSeq	presence	FljB_noPP	none	none	none	ins	none	none
207	63-66	3.31	3.63	3.47	ins	ins	ins		three	sites-1-2-3	Dundee	HiSeq	presence	PP2	none	none	none	ins	none	none
208	61-66	3.18	3.56	3.37	ins	ins	ins		three	sites-1-2-3	Dundee	HiSeq	presence	PP2	none	none	none	ins	none	none
209	87-89	2.25	2.28	2.265	none	ins	ins		two	sites-2-3	1	HiSeq	presence	PP2	none	none	none	ins	none	none
210	7-83	2.72	1.2	1.96	ins	ins	ins		three	sites-1-2-3	Dundee	NextSeq	presence	PP2	none	none	none	ins	none	none
211	101-83	1.1	0.62	0.86	ins**	ins	none	Insertion blast at site-1 differs from general case !!presence of P88 prophage but absence of any insert at site-3	two	sites-1-2	Taunton	NextSeq	presence	PP2	none	none	none	ins	none	none
212	42-69	3.6	3.82	3.71	ins	ins	ins		three	sites-1-2-3	Dundee	HiSeq	presence	PP2	none	none	none	ins	none	none
213	129-74	3.16	3.56	3.36	ins	ins	ins		three	sites-1-2-3	Dundee	HiSeq	presence	PP2	none	none	none	ins	none	none
214	168-73	2.65	3.18	2.915	ins	ins	ins		three	sites-1-2-3	Dundee	HiSeq	presence	PP2	none	none	none	ins	none	none
215	80-69	3.51	3.67	3.59	ins	ins	ins		three	sites-1-2-3	Dundee	HiSeq	presence	PP2	none	none	none	ins	none	none
216	201103752	3.43	3.3	3.365	ins	ins	ins		three	sites-1-2-3	Not available	HiSeq	presence	PP2	none	none	none	ins	none	none
217	45-86	0.33	0.19	0.26	none	ins	none		one	site-2	3aI	NextSeq	presence	PP2	none	none	none	ins	none	none
218	RPO 6464	1.11	1.22	1.165	none	ins	none		one	site-2	Not available	HiSeq	presence	PP2	none	none	none	ins	none	none
219	SMG-20-978	1.13	1.12	1.125	none	ins	none		one	site-2	3aI	MiSeq	presence	PP2	none	none	none	ins	none	none
220	SMG-18-831	1.1	1.19	1.145	none	ins	none		one	site-2	Not available	MiSeq	presence	PP2	none	none	none	none	none	none
221	138-71	0.4	0.26	0.33	none	ins	none		one	site-2	3aI	NextSeq	presence	PP2	none	none	none	ins	none	none
222	139-71	0.53	0.3	0.415	none	ins	none		one	site-2	3aI	NextSeq	presence	PP2	none	none	none	ins	none	none
223	201206684	0.87	0.56	0.715	none	ins	none		one	site-2	Not available	NextSeq	presence	PP2	none	none	none	ins	none	none
224	73-6774	0.8	0.37	0.585	none	ins	none		one	site-2	Not available	NextSeq	presence	PP2	none	none	none	ins	none	none
225	CIP 54.106	0.67	0.51	0.59	none	ins	none		one	site-2	3a	NextSeq	presence	PP2	none	none	none	none	none	none
226	SPPI_23	0.82	0.37	0.595	none	ins	none		one	site-2	Not available	NextSeq	presence	FljB_noPP	none	none	none	none	none	none
227	SPPI_24	0.78	0.38	0.58	none	ins	none		one	site-2	Not available	NextSeq	presence	PP2	none	none	none	ins	none	none
228	73-65	1.13	1.25	1.19	none	ins	none		one	site-2	3aI	HiSeq	presence	PP2	none	none	none	ins	none	none
229	72-65	1.21539	1.39376	1.30458	none	ins	none		one	site-2	3aI	HiSeq	presence	PP2	none	none	none	ins	none	none
230	74-65	1.21	1.41	1.31	none	ins	none		one	site-2	3aI	HiSeq	presence	PP2	none	none	none	ins	none	none
231	HB3	1.05	1.13	1.09	none	ins	none		one	site-2	Not available	HiSeq	presence	PP2_PP7	none	none	none	ins	none	none
232	201810947	0.35	0.22	0.285	none	ins	none		one	site-2	Not available	NextSeq	presence	PP2	none	none	none	ins	none	none
233	202000526	0.86	0.57	0.715	none	ins	none		one	site-2	Not available	NextSeq	presence	PP2	none	none	none	ins	none	none
234	201900502	0.71	0.49	0.6	none	ins	none		one	site-2	Not available	NextSeq	presence	PP2	none	none	none	ins	none	none
235	202100515	0.51	0.32	0.415	none	ins	none		one	site-2	Not available	NextSeq	presence	PP2	none	none	none	ins	none	none
236	201611212	0.4	0.23	0.315	none	ins	none		one	site-2	Not available	NextSeq	presence	PP2	none	none	none	ins	none	none
237	3-59	0.56	0.4	0.48	none	ins	none		one	site-2	Not available	NextSeq	presence	PP2_PP7	none	none	none	none	none	none
238	CIP 54.116	0.79	0.73	0.76	none	ins	none		one	site-2	3aI	NextSeq	presence	PP2	none	none	none	ins	none	none
239	10-62	0.6	0.43	0.515	none	ins	none		one	site-2	Taunton	NextSeq	presence	PP2_PP7	none	none	none	ins	none	none
240	201409601	1.21	1.35	1.28	none	ins	none		one	site-2	Not available	HiSeq	presence	PP2_PP7	none	none	none	ins	none	none
241	200102771	0.62	0.43	0.525	none	ins	none		one	site-2	Not available	NextSeq	presence	PP2_PP7	none	none	none	none	none	none
242	16-66	1.14	1.26	1.2	none	ins	none		one	site-2	Taunton	HiSeq	presence	PP2_PP7	none	none	none	ins	none	none
243	13-52	0.45	0.28	0.365	none	ins	none		one	site-2	Not available	NextSeq	presence	PP2_PP7	none	none	none	ins	none	none
244	16-89	0.6	0.35	0.475	none	ins	none		one	site-2	Taunton	NextSeq	presence	PP2_PP7	none	none	none	none	none	none
245	95-74	1.14	1.25	1.195	none	ins	none		one	site-2	Taunton	HiSeq	presence	PP2_PP7	none	none	none	ins	none	ins
246	80-74	1.04	1.16	1.1	none	ins	none		one	site-2	Taunton	HiSeq	presence	PP2_PP7	none	none	none	ins	none	none
247	54-67	1.2	1.34	1.27	none	ins	none		one	site-2	Taunton	HiSeq	presence	PP2_PP7	none	none	none	ins	none	none
248	202002437	1.11	0.49	0.8	none	ins	none		one	site-2	Not available	NextSeq	presence	PP7else	none	none	none	ins	none	none
249	3-78	0.83	0.32	0.575	none	ins	none		one	site-2	3aI	NextSeq	presence	PP2	none	none	none	ins	none	none
250	201703220	0.8	0.47	0.635	none	ins	none		one	site-2	Not available	NextSeq	presence	PP2_PP7	none	none	none	ins	none	none
251	46-73	1	1.19	1.095	none	ins	none		one	site-2	Taunton	HiSeq	presence	PP2_PP7	none	none	none	ins	none	none
252	13-73	1.11	1.33	1.22	none	ins	none		one	site-2	Taunton	HiSeq	presence	PP2_PP7	none	none	none	ins	none	none
253	117-84	0.81	0.31	0.56	none	ins	none		one	site-2	3aI	NextSeq	presence	PP2	none	none	none	ins	none	none
254	200-75	1.19	1.36	1.275	none	ins	none		one	site-2	Taunton	HiSeq	presence	PP2_PP7	none	none	none	ins	none	none
255	183-75	0.51	0.34	0.425	none	ins	none		one	site-2	Taunton	NextSeq	presence	PP2_PP7	none	none	none	ins	none	none
256	62-83	1.14	1.27	1.205	none	ins	none		one	site-2	Taunton	HiSeq	presence	PP2_PP7	none	none	none	ins	none	none
257	98-73	1.24	1.35	1.295	none	ins	none		one	site-2	Taunton	HiSeq	presence	PP2_PP7	none	none	none	ins	none	none
258	36-62	0.79	0.31	0.55	none	ins	none		one	site-2	Taunton	NextSeq	presence	PP2_PP7	none	none	none	ins	none	none
259	SPPI_14	0.67	0.33	0.5	none	ins	none		one	site-2	Not available	NextSeq	presence	PP2_PP7	none	none	none	ins	none	none
260	201704392	0.61	0.35	0.48	none	ins	none		one	site-2	Not available	NextSeq	presence	PP2_PP7	none	none	none	ins	none	none
261	RKI_15-04639	0.92	0.92	0.92	none	ins	none		one	site-2	Not available	HiSeq	presence	PP2_PP7	none	none	none	ins	none	none
262	1-67	0.85	0.41	0.63	none	ins	none		one	site-2	Taunton	NextSeq	presence	PP2_PP7	none	none	none	ins	none	none
263	17-75	0.68	0.44	0.56	none	ins	none		one	site-2	Not available	NextSeq	presence	PP2_PP7	none	none	none	none	none	none
264	72-76	0.59	0.39	0.49	none	ins	none		one	site-2	Taunton	NextSeq	presence	PP2_PP7	none	none	none	none	none	none
265	RKI_16-01948	1.04	1.14	1.09	none	ins	none		one	site-2	Not available	HiSeq	presence	PP2_PP7	none	none	none	ins	none	none
266	87-65	0.7	0.35	0.525	none	ins	none		one	site-2	Not available	NextSeq	presence	PP2_PP7	none	none	none	ins	none	none
267	4587/84	0.64	0.31	0.475	none	ins	none		one	site-2	Not available	NextSeq	presence	PP2_PP7	none	none	none	ins	none	none
268	157269	0.98	1	0.99	none	ins	none		one	site-2	Not available	HiSeq	presence	PP2_PP7	none	none	none	ins	none	none
269	201708800	0.56	0.31	0.435	none	ins	none		one	site-2	Not available	NextSeq	presence	PP2_PP7	none	none	none	ins	none	none
270	652965	1.17	1.63	1.4	none	ins	none		one	site-2	Not available	HiSeq	presence	PP2_PP7	none	none	none	ins	none	none
271	890420	1.51	1.23	1.37	none	ins	none		one	site-2	Not available	HiSeq	presence	PP2_PP7	none	none	none	ins	none	none
272	813384	1.24	1.09	1.165	none	ins	none		one	site-2	Not available	HiSeq	presence	PP2_PP7	none	none	none	ins	none	none
273	808192	1.26	1.17	1.215	none	ins	none		one	site-2	Not available	HiSeq	presence	PP2_PP7	none	none	none	ins	none	none
274	436944	1.52	1.08	1.3	none	ins	none		one	site-2	Not available	HiSeq	presence	PP2_PP7	none	none	none	ins	none	none
275	164895	1.19	1.31	1.25	none	ins	none		one	site-2	Not available	HiSeq	presence	PP2_PP7	none	none	none	ins	none	none
276	166379	1.52	1.75	1.635	none	ins	none		one	site-2	Not available	HiSeq	presence	PP2_PP7	none	none	none	ins	none	none
277	182074	1.24	1.37	1.305	none	ins	none		one	site-2	Not available	HiSeq	presence	PP2_PP7	none	none	none	ins	none	none
278	SMG-20-959	1.15	1.08	1.115	none	ins	none		one	site-2	Not available	MiSeq	presence	PP2	none	none	none	ins	none	none
279	SH16G5113	1.13	0.96	1.045	none	ins	none		one	site-2	Not available	HiSeq	presence	PP2_PP7	none	none	none	ins	none	none
280	SPPI_20110	0.7	0.27	0.485	none	ins	none		one	site-2	Not available	NextSeq	presence	PP2_PP7	none	none	none	ins	none	none
281	164-75	0.63	0.36	0.495	none	ins	none		one	site-2	Dundee	NextSeq	presence	PP2	none	none	none	ins	none	none
282	122-74	1.31	1.26	1.285	none	ins	none		one	site-2	Taunton	HiSeq	presence	PP2_PP7	none	none	none	ins	none	none
283	3661/82	0.45	0.33	0.39	none	ins	none		one	site-2	Not available	NextSeq	presence	PP2_PP7	none	none	none	ins	none	none
284	SMG-20-961	1.09	1.07	1.08	none	ins	ins**	Site-3 is not similar to other isolates. The prophage inserted at site-3 is likely not P88.	two	site-2***	Not available	MiSeq	presence	PP2_PP7	none	none	none	ins	none	none
285	SMG-20-954	1.24	1.06	1.15	none	ins	none		one	site-2	Taunton	MiSeq	presence	PP2_PP7	none	none	none	ins	none	none
286	617004	1.6	1.72	1.66	none	ins	none		one	site-2	Not available	HiSeq	presence	PP2_PP7	none	none	none	ins	none	none
287	201606982	0.25	0.15	0.2	none	ins	none		one	site-2	Not available	NextSeq	presence	PP2_PP7	none	none	none	ins	none	none
288	00-6417	1.16	1.29	1.225	none	ins	none		one	site-2	Dundee	HiSeq	presence	PP2_PP7	none	none	none	ins	none	none
289	SMG-20-973	0.89	0.64	0.765	none	ins	none		one	site-2	Not available	MiSeq	presence	PP2_PP7	none	none	none	ins	none	none
290	01-7995	1.11	1.15	1.13	none	ins	none		one	site-2	Dundee	HiSeq	presence	PP2_PP7	none	none	none	ins	none	none
291	36-74	0.63	0.47	0.55	none	ins	none		one	site-2	Not available	NextSeq	presence	PP2	none	none	none	ins	none	none
292	SMG-19-211	1.27	1.22	1.245	none	ins	none		one	site-2	Not available	MiSeq	presence	PP2_PP7	none	none	none	ins	none	none
293	475848	1.56	1.76	1.66	none	ins	none		one	site-2	Not available	HiSeq	presence	PP2_PP7	none	none	none	ins	none	none
294	RKI_04-00630	2.84	3.09	2.965	none	ins	ins		two	sites-2-3	Not available	HiSeq	presence	PP2_PP7	none	none	none	ins	none	none
295	201543	1.3	1.48	1.39	none	ins	none		one	site-2	Not available	HiSeq	presence	PP2_PP7	none	none	none	ins	none	none
296	248546	1.23	1.38	1.305	none	ins	none		one	site-2	Not available	HiSeq	presence	PP2_PP7	none	none	none	ins	none	none
297	19-88	0.63	0.37	0.5	none	ins	none		one	site-2	RDNC	NextSeq	presence	PP2_PP7	none	none	none	ins	none	none
298	SMG-20-952	1.11	0.93	1.02	none	ins	none		one	site-2	Taunton	MiSeq	presence	PP2_PP7	none	none	none	ins	none	none
299	SMG-20-967	1.29	1.1	1.195	none	ins	none		one	site-2	Taunton	MiSeq	presence	PP2_PP7	none	none	none	none	none	none
300	SMG-20-966	1.11	0.95	1.03	none	ins	none		one	site-2	Taunton	MiSeq	presence	PP2_PP7	none	none	none	ins	none	none
301	201002201	0.72	0.5	0.61	none	ins	none		one	site-2	Not available	NextSeq	presence	PP2	none	none	none	ins	none	none
302	201301733	1.37	1.33	1.35	none	ins	none		one	site-2	Not available	HiSeq	presence	PP2	none	none	none	ins	none	none
303	200602696	0.66	0.35	0.505	none	ins	none		one	site-2	Not available	NextSeq	presence	PP2	none	none	none	ins	none	none
304	200608191	0.74	0.43	0.585	none	ins	none		one	site-2	Not available	NextSeq	presence	PP2	none	none	none	ins	none	none
305	SPPI_8	0.54	0.32	0.43	none	ins	none		one	site-2	Not available	NextSeq	presence	PP2_PP7	none	none	none	ins	none	none
306	SPPI_9	0.56	0.44	0.5	none	ins	none		one	site-2	Not available	NextSeq	presence	PP2_PP7	none	none	none	ins	none	none
307	73-82	1.18	1.37	1.275	none	ins	none		one	site-2	Taunton	HiSeq	presence	PP2_PP7	none	none	none	ins	none	none
308	SMG-20-955	1.09	1	1.045	none	ins	none		one	site-2	Not available	MiSeq	presence	PP2_PP7	none	none	none	ins	none	none
309	43-84	0.42	0.21	0.315	none	ins	none		one	site-2	Taunton	NextSeq	presence	PP2_PP7	none	none	none	ins	none	none
310	86-66	1.11	1.18	1.145	none	ins	none		one	site-2	Taunton	HiSeq	presence	PP2_PP7	none	none	none	ins	none	none
311	9-56	1.13	1.24	1.185	none	ins	none		one	site-2	Not available	HiSeq	presence	PP2_PP7	none	none	none	ins	none	none
312	B97-7624	0.65	0.35	0.5	none	ins	none		one	site-2	Dundee	NextSeq	presence	PP2_PP7	none	none	none	none	none	none
313	60-83	1.14	1.23	1.185	none	ins	none		one	site-2	3aI	HiSeq	presence	PP2	none	none	none	none	none	none
314	SARA46	1.26	1.42	1.34	none	ins	none		one	site-2	Not available	HiSeq	presence	PP2_PP7	none	none	none	ins	none	none
315	B1655	0.59	0.45	0.52	none	ins	none		one	site-2	Taunton	NextSeq	presence	PP2_PP7	none	none	none	ins	none	none
316	141-76	0.77	0.43	0.6	none	ins	none		one	site-2	Taunton	NextSeq	presence	PP2_PP7	none	none	none	ins	none	none
317	78-2556	0.74	0.3	0.52	none	ins	none		one	site-2	Not available	NextSeq	presence	PP2_PP7	none	none	none	ins	none	none
318	FTP 81	1.15	1.26	1.205	none	ins	none		one	site-2	Not available	HiSeq	presence	PP2_PP7	none	none	none	ins	none	none
319	JSV 7371	1.21	1.34	1.275	none	ins	none		one	site-2	Not available	HiSeq	presence	PP2_PP7	none	none	none	ins	none	none
320	78-3169	0.6	0.34	0.47	none	ins	none		one	site-2	Not available	NextSeq	presence	PP2_PP7	none	none	none	ins	none	none
321	78-3168	1.1	0.42	0.76	none	ins	none		one	site-2	Not available	NextSeq	presence	PP2_PP7	none	none	none	ins	none	none
322	ELB 6380	1.06	1.14	1.1	none	ins	none		one	site-2	Not available	HiSeq	presence	PP2_PP7	none	none	none	ins	none	none
323	MUG 6222	1.12	1.18	1.15	none	ins	none		one	site-2	Not available	HiSeq	presence	PP2_PP7	none	none	none	ins	none	none
324	CLA-113-7	1.29	1.47	1.38	none	ins	none		one	site-2	Not available	NextSeq	presence	PP2_PP7	none	none	none	ins	none	none
325	CLA-143-9	0.98	1.06	1.02	none	ins	none		one	site-2	Not available	NextSeq	presence	PP2_PP7	none	none	none	ins	none	none
326	CLA-53-1	0.997214	1.03489	1.01605	none	ins	none		one	site-2	Not available	MiSeq	presence	PP2_PP7	none	none	none	ins	none	none
327	CLA-113-4	1.41	1.71	1.56	none	ins	none		one	site-2	Not available	NextSeq	presence	PP2_PP7	none	none	none	ins	none	none
328	SPPI_28	0.72	0.39	0.555	none	ins	none		one	site-2	Not available	NextSeq	presence	PP2_PP7	none	none	none	ins	none	none
329	69-0690	0.7	0.39	0.545	none	ins	none		one	site-2	Not available	NextSeq	presence	PP2_PP7	none	none	none	ins	none	none
330	70-65	1.36	1.48	1.42	none	ins	none		one	site-2	Beccles	HiSeq	presence	PP2	none	none	none	ins	none	none
331	CIP 54.113	0.55	0.41	0.48	none	ins	none		one	site-2	Taunton	NextSeq	presence	PP2_PP7	none	none	none	ins	none	none
332	13839	1.21	1.38	1.295	none	ins	none		one	site-2	Taunton	HiSeq	presence	PP2_PP7	none	none	none	none	none	none
333	201006450	1.03	1.13	1.08	none	ins	none		one	site-2	Not available	HiSeq	presence	PP2_PP7	none	none	none	ins	none	none
334	44_PB-J	1.08	1.16	1.12	none	ins	none		one	site-2	Not available	HiSeq	presence	PP2_PP7	none	none	none	ins	none	none
335	Burnett-SPE70	0.72	0.66	0.69	none	ins	none		one	site-2	Not available	MiSeq	presence	PP2_PP7	none	none	none	ins	none	none
336	04-6017	0.96	0.99	0.975	none	ins	none		one	site-2	Not available	HiSeq	presence	PP2_PP7	none	none	none	ins	none	none
337	383937	1.58591	1.66735	1.62663	none**	ins	none	SopE and site-2 (mdoB partial CDS) were found on the same node of the assembly; likely no insertion at site-1 as blast output strongly differs from expectations	two	site-2***	Not available	HiSeq	presence	PP2_PP7	none	none	#a88fa2	ins	none	none
338	201608990	0.61	0.39	0.5	none	ins	none		one	site-2	Not available	NextSeq	presence	PP2_PP7	none	none	none	ins	none	none
339	3766/82	0.65	0.43	0.54	none	ins	none		one	site-2	Taunton	NextSeq	presence	PP2_PP7	none	none	none	ins	none	none
340	127431	1.07	1.09	1.08	none	ins	none		one	site-2	Not available	HiSeq	presence	PP2_PP7	none	none	none	ins	none	none
341	201809295	0.69	0.59	0.64	none	ins	none		one	site-2	Not available	NextSeq	presence	PP2_PP7	none	none	none	ins	none	none
342	201609017	0.63	0.31	0.47	none	ins	none		one	site-2	Not available	NextSeq	presence	PP2_PP7	none	none	none	ins	none	none
343	792595	1.14	1.14	1.14	none	ins	none		one	site-2	Not available	HiSeq	presence	PP2_PP7	none	none	none	ins	none	none
344	200705319	0.84	0.36	0.6	none	ins	none		one	site-2	Not available	NextSeq	presence	PP2_PP7	none	none	none	ins	none	none
345	1125477	1.3	1.04	1.17	none	ins	none		one	site-2	Taunton	HiSeq	presence	PP2_PP7	none	none	none	none	none	none
346	SMG-20-989	1.34	1.22	1.28	none	ins	none		one	site-2	Not available	MiSeq	presence	PP2_PP7	none	none	none	none	none	none
347	68678	1.19	1.27	1.23	none	ins	none		one	site-2	Taunton	HiSeq	presence	PP2_PP7	none	none	none	none	none	none
348	723633	1.4	1.2	1.3	none	ins	none		one	site-2	Not available	HiSeq	presence	PP2_PP7	none	none	none	none	none	none
349	163226	1.11	1.18	1.145	none	ins	none		one	site-2	Not available	HiSeq	presence	PP2_PP7	none	none	none	none	none	none
350	RKI_16-00161	1.31	1.37	1.34	none	ins	none		one	site-2	Not available	MiSeq	presence	PP2_PP7	none	none	none	none	none	none
351	916942	1.32	0.97	1.145	none	ins	none		one	site-2	Not available	HiSeq	presence	PP2_PP7	none	none	none	none	none	none
352	91-67	1.17	1.31	1.24	none	ins	none		one	site-2	Taunton	HiSeq	presence	PP2_PP7	none	none	none	ins	none	none
353	89-67	1.14	1.26	1.2	none	ins	none		one	site-2	Taunton	HiSeq	presence	PP2_PP7	none	none	none	ins	none	none
354	87-67	1.12	1.25	1.185	none	ins	none		one	site-2	Taunton	HiSeq	presence	PP2_PP7	none	none	none	ins	none	none
355	88-67	1.08	1.21	1.145	none	ins	none		one	site-2	Taunton	HiSeq	presence	PP2_PP7	none	none	none	ins	none	none
356	201900702	0.55	0.38	0.465	none	ins	none		one	site-2	Not available	NextSeq	presence	PP2_PP7	none	none	none	ins	none	none
357	03-9927	1.21	1.34	1.275	none	ins	none		one	site-2	Not available	HiSeq	presence	PP2_PP7	none	none	none	ins	none	none
358	SMG-20-998	0.97	0.89	0.93	none	ins	none		one	site-2	Not available	MiSeq	presence	PP2_PP7	none	none	none	ins	none	none
359	575132	0.95	0.88	0.915	none	ins	none		one	site-2	Not available	HiSeq	presence	PP2_PP7	none	none	none	ins	none	none
360	874835	1.17	1	1.085	none	ins	none		one	site-2	Not available	HiSeq	presence	PP2_PP7	none	none	none	none	none	none
361	43_PB-J	1.18	1.3	1.24	none	ins	none		one	site-2	Not available	HiSeq	presence	PP2_PP7	none	none	none	none	none	none
362	201907308	0.5	0.33	0.415	none	ins	none		one	site-2	Not available	NextSeq	presence	PP2_PP7	none	none	none	none	none	none
363	31936	1.06	1.14	1.1	none	ins	none		one	site-2	Taunton	HiSeq	presence	PP2_PP7	none	none	none	none	none	none
364	440068	1.56	1.62	1.59	none	ins	none		one	site-2	Not available	HiSeq	presence	PP2_PP7	none	none	none	none	none	none
365	SMG-20-1001	1.24	1.16	1.2	none	ins	none		one	site-2	Not available	MiSeq	presence	PP2_PP7	none	none	none	ins	none	none
366	H73700271	0.65	0.64	0.645	none	ins	none		one	site-2	Not available	Genome_Analyzer_II	presence	PP2_PP7	none	none	none	ins	none	none
367	SMG-20-963	0.95	0.68	0.815	none	ins	none		one	site-2	Taunton	MiSeq	presence	PP2_PP7	none	none	none	ins	none	none
368	SMG-20-974	1.04	0.89	0.965	none	ins	none		one	site-2	Not available	MiSeq	presence	PP2_PP7	none	none	none	ins	none	none
369	454903	1.48	1.33	1.405	none	ins	none		one	site-2	Not available	HiSeq	presence	PP2_PP7	none	none	none	ins	none	none
370	454881	1.7	1.69	1.695	none	ins	none		one	site-2	Not available	HiSeq	presence	PP2_PP7	none	none	none	ins	none	none
371	201704389	0.66	0.43	0.545	none	ins	none		one	site-2	Not available	NextSeq	presence	PP2_PP7	none	none	none	ins	none	none
372	P7704	NA	NA	NA	none	ins	none			site-2	Not available		presence	PP2_PP7	none	none	none	ins	none	none
373	201700708	0.61	0.49	0.55	none	ins	none		one	site-2	Not available	NextSeq	presence	PP2_PP7	none	none	none	ins	none	none
374	201800826	0.64	0.51	0.575	none	ins	none		one	site-2	Not available	NextSeq	presence	PP2_PP7	none	none	none	ins	none	none
375	841378	1.11	1.08	1.095	none	ins	none		one	site-2	Not available	HiSeq	presence	PP2_PP7	none	none	none	ins	none	none
376	658623	0.87	0.48	0.675	none	ins	none		one	site-2	Not available	HiSeq	presence	PP2_PP7	none	none	none	ins	none	none
377	MS170024	1.25	1.21	1.23	none	ins	none		one	site-2	Not available	HiSeq	presence	PP2_PP7	none	none	none	ins	none	none
378	201711578	0.51	0.4	0.455	none	ins	none		one	site-2	Not available	NextSeq	presence	PP2_PP7	none	none	none	ins	none	none
379	1137926	1.12	0.61	0.865	none	ins	none		one	site-2	Dundee	HiSeq	presence	PP2_PP7	none	none	none	ins	none	none
380	202000134	0.63	0.36	0.495	none	ins	none		one	site-2	Not available	NextSeq	presence	PP2_PP7	none	none	none	ins	none	none
381	201412010	0.41	0.17	0.29	none	ins	none		one	site-2	Not available	NextSeq	presence	PP2_PP7	none	none	none	none	none	none
382	201502579	0.78	0.32	0.55	none	ins	none		one	site-2	Not available	NextSeq	presence	PP2_PP7	none	none	none	none	none	none
383	201905260	0.65	0.36	0.505	none	ins	none		one	site-2	Not available	NextSeq	presence	PP2_PP7	none	none	none	none	none	none
384	410878	1.53	1.73	1.63	none	ins	none		one	site-2	Not available	HiSeq	presence	PP2_PP7	none	none	none	none	none	none
385	H103520475	1.18	1.31	1.245	none	ins	none		one	site-2	Not available	HiSeq	presence	PP2_PP7	none	none	none	none	none	none
386	201908452	0.75	0.37	0.56	none	ins	none		one	site-2	Not available	NextSeq	presence	PP2_PP7	none	none	none	none	none	none
387	201711516	0.58	0.48	0.53	none	ins	none		one	site-2	Not available	NextSeq	presence	PP7else	none	none	none	none	none	none
388	SMG-20-1008	1.27	1.16	1.215	none	ins	none		one	site-2	Taunton	MiSeq	presence	PP2_PP7	none	none	none	none	none	none
389	H070540154v1	0.7	0.66	0.68	none	ins	none		one	site-2	Not available	Genome_Analyzer_II	presence	PP2_PP7	none	none	none	none	none	none
390	83283	1.28	1.4	1.34	none	ins	none		one	site-2	Taunton	HiSeq	presence	PP2_PP7	none	none	none	none	none	none
391	83282	1.05	1.1	1.075	none	ins	none		one	site-2	Not available	HiSeq	presence	PP2_PP7	none	none	none	none	none	none
392	RKI_15-04049	1.02	1.13	1.075	none	ins	none		one	site-2	Not available	MiSeq	presence	PP2_PP7	none	none	none	none	none	none
393	201004976	1.11	1.26	1.185	none	ins	none		one	site-2	Not available	HiSeq	presence	PP2_PP7	none	none	none	none	none	none
394	129499	1.17	1.31	1.24	none	ins	none		one	site-2	Not available	HiSeq	presence	PP2_PP7	none	none	none	none	none	none
395	201800151	0.44	0.25	0.345	none	ins	none		one	site-2	Not available	NextSeq	presence	PP2_PP7	none	none	none	none	none	none
396	H104240488	1.26	1.39	1.325	none	ins	none	!! There is a hit for P88 prophage, but is not inserted at site-3 and likely not with sopE	one	site-2	Not available	HiSeq	presence	PP2_PP7	none	none	none	ins	none	none
397	S275240	1.11	1.16	1.135	none	ins	none		one	site-2	Not available	HiSeq	presence	PP2_PP7	none	none	none	none	none	none
398	201903679	0.69	0.32	0.505	none	ins	none		one	site-2	Not available	NextSeq	presence	PP2_PP7	none	none	none	none	none	none
399	201708949	0.75	0.55	0.65	none	ins	none		one	site-2	Not available	NextSeq	presence	PP7else	none	none	none	none	none	none
400	202107757	0.87	0.46	0.665	none	ins	none		one	site-2	Not available	NextSeq	presence	PP7else	none	none	none	none	none	none
401	201710889	0.36	0.23	0.295	none	ins	none		one	site-2	Not available	NextSeq	presence	PP2_PP7	none	none	none	none	none	none
402	201803542	0.43	0.29	0.36	none	ins	none		one	site-2	Not available	NextSeq	presence	PP2_PP7	none	none	none	none	none	none
403	201807370	0.82	0.55	0.685	none	ins	none		one	site-2	Not available	NextSeq	presence	PP2_PP7	none	none	none	none	none	none
404	201007632	1.12	1.25	1.185	none	ins	none		one	site-2	Not available	HiSeq	presence	PP2_PP7	none	none	none	none	none	none
405	845690	1.14	1.06	1.1	none	ins	none		one	site-2	Not available	HiSeq	presence	PP2_PP7	none	none	none	none	none	none
406	886703	1.06	0.9	0.98	none	ins	none		one	site-2	Not available	HiSeq	presence	PP2_PP7	none	none	none	none	none	none
407	1137915	1.18	0.92	1.05	none	ins	none		one	site-2	Taunton	HiSeq	presence	PP2_PP7	none	none	none	none	none	none
408	243874	1.25	1.39	1.32	none	ins	none		one	site-2	Not available	HiSeq	presence	PP2_PP7	none	none	none	none	none	none
409	201412266	1.13	1.3	1.215	none	ins	none		one	site-2	Not available	HiSeq	presence	PP2_PP7	none	none	none	none	none	none
410	RKI_16-00770	1.12	1.12	1.12	none	ins	none		one	site-2	Not available	MiSeq	presence	PP2_PP7	none	none	none	none	none	none
411	201907215	0.58	0.28	0.43	none	ins	none		one	site-2	Not available	NextSeq	presence	PP2_PP7	none	none	none	none	none	none
412	576405	1.26	1.01	1.135	none	ins	none		one	site-2	Not available	HiSeq	presence	PP2_PP7	none	none	none	none	none	none
413	201707432	1.02	0.47	0.745	none	ins	none		one	site-2	Not available	NextSeq	presence	PP2_PP7	none	none	none	none	none	none
414	201904044	0.76	0.35	0.555	none	ins	none		one	site-2	Not available	NextSeq	presence	PP2_PP7	none	none	none	none	none	none
415	707210	1.56	1.22	1.39	none	ins	none		one	site-2	Not available	HiSeq	presence	PP2_PP7	none	none	none	none	none	none
416	29-67	1.1	1.19	1.145	none	ins	none		one	site-2	Taunton	HiSeq	presence	PP2_PP7	none	none	none	ins	none	none
417	112-74	2.42	2.68	2.55	none	ins	ins		two	sites-2-3	Dundee	HiSeq	presence	PP2_PP7	none	none	none	ins	none	none
418	RKI_16-02907	2.78	3.36	3.07	none	ins	ins		two	sites-2-3	Not available	MiSeq	presence	PP2_PP7	none	none	none	ins	none	none
419	78-2965	1.79	0.92	1.355	none	ins	ins		two	sites-2-3	Not available	NextSeq	presence	PP2_PP7	none	none	none	ins	none	none
420	175-75	1.67	0.79	1.23	none	ins	ins		two	sites-2-3	Dundee	NextSeq	presence	PP2_PP7	none	none	none	ins	none	none
421	147871	1.28	1.46	1.37	none	ins	none		one	site-2	Not available	HiSeq	presence	PP2_PP7	none	none	none	ins	none	none
422	201708500	0.83	0.56	0.695	none	ins	none		one	site-2	Not available	NextSeq	presence	PP2_PP7	none	none	none	ins	none	none
423	SPPI_19	0.74	0.34	0.54	none	ins	none		one	site-2	Not available	NextSeq	presence	PP2_PP7	none	none	none	ins	none	none
424	SPPI_31	0.82	0.32	0.57	none	ins	none		one	site-2	Not available	NextSeq	presence	PP2_PP7	none	none	none	ins	none	none
425	SPPI_25	0.72	0.43	0.575	none	ins	none		one	site-2	Not available	NextSeq	presence	PP2_PP7	none	none	none	none	none	none
426	200007388	0.49	0.3	0.395	none	ins	none		one	site-2	Dundee	NextSeq	presence	PP2_PP7	none	none	none	ins	none	none
427	188-75	1.2	1.31	1.255	none	ins	none		one	site-2	Taunton	HiSeq	presence	PP2_PP7	none	none	none	ins	none	none
428	64-83	1.17	1.3	1.235	none	ins	none		one	site-2	Taunton	HiSeq	presence	PP2_PP7	none	none	none	ins	none	none
429	897254	1.06	1.03	1.045	none	ins	none		one	site-2	Not available	HiSeq	presence	PP2_PP7	none	none	none	ins	none	none
430	201708437	0.52	0.34	0.43	none	ins	none		one	site-2	Not available	NextSeq	presence	PP2_PP7	none	none	none	ins	none	none
431	201707833	0.59	0.34	0.465	none	ins	none		one	site-2	Not available	NextSeq	presence	PP2_PP7	none	none	none	ins	none	none
432	180-76	0.59	0.26	0.425	none	ins	none		one	site-2	Dundee	NextSeq	presence	PP2	none	none	none	ins	none	none
433	79-65	1.07	1.17	1.12	none	ins	none		one	site-2	Taunton	HiSeq	presence	PP2_PP7	none	none	none	ins	none	none
434	77-65	1.17	1.29	1.23	none	ins	none		one	site-2	Taunton	HiSeq	presence	PP2_PP7	none	none	none	ins	none	none
435	75-65	1.12	1.23	1.175	none	ins	none		one	site-2	Taunton	HiSeq	presence	PP2_PP7	none	none	none	ins	none	none
436	6-61	0.37	0.26	0.315	none	ins	none		one	site-2	Not available	NextSeq	presence	PP2_PP7	none	none	none	ins	none	none
437	9-61	0.54	0.38	0.46	none	ins	none		one	site-2	Not available	NextSeq	presence	PP2_PP7	none	none	none	ins	none	none
438	67-70	1.28	0.71	0.995	none	ins	none		one	site-2	Not available	NextSeq	presence	PP2_PP7	none	none	none	ins	none	none
439	40-84	0.72	0.32	0.52	none	ins	none		one	site-2	Taunton	NextSeq	presence	PP2_PP7	none	none	none	ins	none	none
440	25-88	1.17	1.3	1.235	none	ins	none		one	site-2	Taunton	HiSeq	presence	PP2_PP7	none	none	none	ins	none	none
441	201006596	1.19	1.3	1.245	none	ins	none		one	site-2	Not available	HiSeq	presence	PP2_PP7	none	none	none	none	none	none
442	75-90	1.2	1.29	1.245	none	ins	none		one	site-2	3a	HiSeq	presence	PP2_PP7	none	none	none	ins	none	none
443	B97-9885	0.6	0.38	0.49	none	ins	none		one	site-2	Not available	NextSeq	presence	PP2_PP7	none	none	none	ins	none	none
444	200606439	0.57	0.26	0.415	none	ins	none		one	site-2	Not available	NextSeq	presence	PP2_PP7	none	none	none	ins	none	none
445	201108561	1.19	1.32	1.255	none	ins	none		one	site-2	Not available	HiSeq	presence	PP2_PP7	none	none	none	ins	none	none
446	42-90	1.11	1.26	1.185	none	ins	none		one	site-2	Taunton	HiSeq	presence	PP2_PP7	none	none	none	ins	none	none
447	114-66	1.14	1.26	1.2	none	ins	none		one	site-2	Taunton	HiSeq	presence	PP2_PP7	none	none	none	ins	none	none
448	201607893	0.4	0.29	0.345	none	ins	none		one	site-2	Not available	NextSeq	presence	PP2_PP7	none	none	none	ins	none	none
449	201202991	0.74	0.43	0.585	none	ins	none		one	site-2	Not available	NextSeq	presence	PP2_PP7	none	none	none	ins	none	none
450	32-88	1.16	1.31	1.235	none	ins	none		one	site-2	Taunton	HiSeq	presence	PP2_PP7	none	none	none	ins	none	none
451	B91-359	1.09	1.22	1.155	none	ins	none		one	site-2	Taunton	HiSeq	presence	PP2_PP7	none	none	none	none	none	none
452	201109301	0.78	0.32	0.55	none	ins	none		one	site-2	Not available	NextSeq	presence	PP2_PP7	none	none	none	ins	none	none
453	135-73	0.65	0.28	0.465	none	ins	none		one	site-2	Non typable	NextSeq	presence	PP7else	no_decision	none	none	ins	none	none
454	76-82	1.15	1.29	1.22	none	ins	none		one	site-2	Taunton	HiSeq	presence	PP2_PP7	none	none	none	ins	none	none
455	36-87	1.14	1.24	1.19	none	ins	none		one	site-2	Taunton	HiSeq	presence	PP2_PP7	none	none	none	ins	none	none
456	B98-7433	0.64	0.31	0.475	none	ins	none		one	site-2	Dundee	NextSeq	presence	PP2_PP7	none	none	none	ins	none	none
457	201408568	1.11	1.19	1.15	none	ins	none		one	site-2	Not available	HiSeq	presence	PP2_PP7	none	none	none	ins	none	none
458	46-89	1.14	1.27	1.205	none	ins	none		one	site-2	Taunton	HiSeq	presence	PP2_PP7	none	none	none	ins	none	none
459	53-89	1.17	1.31	1.24	none	ins	none		one	site-2	Taunton	HiSeq	presence	PP2_PP7	none	none	none	ins	none	none
460	B91-65	1.49	1.63	1.56	none	ins	none		one	site-2	Taunton	HiSeq	presence	PP2_PP7	none	none	none	ins	none	none
461	200807047	1.14	0.4	0.77	none	ins	none		one	site-2	Not available	NextSeq	presence	PP2_PP7	none	none	none	ins	none	none
462	68-82	1.09	1.26	1.175	none	ins	none		one	site-2	Taunton	HiSeq	presence	PP2_PP7	none	none	none	ins	none	none
463	103-84	1.18	1.32	1.25	none	ins	none		one	site-2	Taunton	HiSeq	presence	PP2_PP7	none	none	none	ins	none	none
464	200107167	0.56	0.29	0.425	none	ins	none		one	site-2	Dundee	NextSeq	presence	PP2_PP7	none	none	none	ins	none	none
465	00-6504	1.09	1.22	1.155	none	ins	none		one	site-2	Dundee	HiSeq	presence	PP2_PP7	none	none	none	ins	none	none
466	02-8042	1.1	1.2	1.15	none	ins	none		one	site-2	Taunton	HiSeq	presence	PP2_PP7	none	none	none	ins	none	none
467	05-4862	1.08	1.17	1.125	none	ins	none		one	site-2	Not available	HiSeq	presence	PP2_PP7	none	none	none	ins	none	none
468	106-86	1.16	1.31	1.235	none	ins	none		one	site-2	3aI	HiSeq	presence	PP2	none	none	none	ins	none	none
469	131-86	1.37	1.28	1.325	none	ins	none		one	site-2	3aI	HiSeq	presence	PP2	none	none	none	ins	none	none
470	39-90	1.12	1.24	1.18	none	ins	none		one	site-2	3aI	HiSeq	presence	PP2	none	none	none	ins	none	none
471	32-90	1.14	1.35	1.245	none	ins	none		one	site-2	Taunton	HiSeq	presence	PP2_PP7	none	none	none	#8296ab	none	none
472	02-7168	1.2	1.24	1.22	none	ins	none		one	site-2	Taunton	HiSeq	presence	PP2_PP7	none	none	none	ins	none	none
473	37-88	1.12	1.27	1.195	none	ins	none		one	site-2	Taunton	HiSeq	presence	PP2_PP7	none	none	none	ins	none	none
474	99-7459	1.21	1.37	1.29	none	ins	none		one	site-2	3aI	HiSeq	presence	PP2_PP7	none	none	none	ins	none	none
475	50-89	1.15	1.28	1.215	none	ins	none		one	site-2	RDNC	HiSeq	presence	PP2_PP7	none	none	none	ins	none	none
476	63-82	0.88	1.05	0.965	none	ins	none		one	site-2	Taunton	HiSeq	presence	PP2_PP7	none	none	none	ins	none	none
477	94-89	1.14	1.33	1.235	none	ins	none		one	site-2	Dundee	HiSeq	presence	PP2_PP7	none	none	none	ins	none	none
478	B94-8145	0.54	0.26	0.4	none	ins	none		one	site-2	Taunton	NextSeq	presence	PP2_PP7	none	none	none	ins	none	none
479	200306909	0.52	0.35	0.435	none	ins	none		one	site-2	Not available	NextSeq	presence	PP2_PP7	none	none	none	ins	none	none
480	00-6821	1.18	1.3	1.24	none	ins	none		one	site-2	Dundee	HiSeq	presence	PP2_PP7	none	none	none	ins	none	none
481	57-90	1.14	1.28	1.21	none	ins	none		one	site-2	Dundee	HiSeq	presence	PP2_PP7	none	none	none	ins	none	none
482	55-89	1.09	1.23	1.16	none	ins	none		one	site-2	Dundee	HiSeq	presence	PP2_PP7	none	none	none	ins	none	none
483	37-87	1.12	1.21	1.165	none	ins	none		one	site-2	RDNC	HiSeq	presence	PP2_PP7	none	none	none	ins	none	none
484	09-6120	1.04	1.12	1.08	none	ins	none		one	site-2	Not available	HiSeq	presence	PP2_PP7	none	none	none	ins	none	none
485	40-87	1.16	1.33	1.245	none	ins	none		one	site-2	Taunton	HiSeq	presence	PP2_PP7	none	none	none	ins	none	none
486	145-75	0.81	0.4	0.605	none	ins	none		one	site-2	Taunton	NextSeq	presence	PP7else	none	none	none	ins	none	none
487	200205663	0.62	0.32	0.47	none	ins	none		one	site-2	Dundee	NextSeq	presence	PP2_PP7	none	none	none	ins	none	none
488	41-89	1.17	1.34	1.255	none	ins	none		one	site-2	Taunton	HiSeq	presence	PP2_PP7	none	none	none	ins	none	none
489	200705718	1.37	0.56	0.965	none	ins	ins		two	sites-2-3	Not available	NextSeq	presence	PP2_PP7	none	none	none	ins	none	none
490	143-78	2	0.94	1.47	none	ins	ins		two	sites-2-3	Dundee	NextSeq	presence	PP2_PP7	none	none	none	ins	none	none
491	117-79	1.63	0.99	1.31	none	ins	ins		two	sites-2-3	Dundee	NextSeq	presence	PP2_PP7	none	none	none	ins	none	none
492	144-73	1.39	0.89	1.14	none	ins	ins		two	sites-2-3	Dundee	NextSeq	presence	PP2_PP7	none	none	none	ins	none	none
493	211-75	1.01	1.12	1.065	none	ins	none		one	site-2	Not available	HiSeq	presence	PP2_PP7	none	none	none	ins	none	none
494	SARA43	2.27	2.68	2.475	none	ins	ins		two	sites-2-3	Not available	HiSeq	presence	PP2_PP7	none	none	none	ins	none	none
495	90-85	2	0.93	1.465	none	ins	ins		two	sites-2-3	Dundee	NextSeq	presence	PP2_PP7	none	none	none	ins	none	none
496	59-85	2.22	2.42	2.32	none	ins	ins		two	sites-2-3	Dundee	HiSeq	presence	PP2_PP7	none	none	none	ins	none	none
497	116-86	1.98	2.39	2.185	none	ins	ins		two	sites-2-3	Dundee	HiSeq	presence	PP2_PP7	none	none	none	ins	none	none
498	723623	2.6	2.51	2.555	none	ins	ins		two	sites-2-3	Not available	HiSeq	presence	PP2_PP7	none	none	none	ins	none	none
499	304577	2.3	2.1	2.2	none	ins	ins		two	sites-2-3	Not available	HiSeq	presence	PP2_PP7	none	none	none	ins	none	none
500	1137923	3.13	2.25	2.69	none	ins	ins		two	sites-2-3	Dundee	HiSeq	presence	PP2_PP7	none	none	none	ins	none	none
501	1136471	2.73	2.08	2.405	none	ins	ins		two	sites-2-3	Dundee	HiSeq	presence	PP2_PP7	none	none	none	ins	none	none
502	38-87	2.17	2.42	2.295	none	ins	ins		two	sites-2-3	Dundee	HiSeq	presence	PP2_PP7	none	none	none	ins	none	none
503	201106616	1.38	0.55	0.965	none	ins	ins		two	sites-2-3	Not available	NextSeq	presence	PP2_PP7	none	none	none	ins	none	none
504	201006986	2.37	2.62	2.495	none	ins	ins		two	sites-2-3	Not available	HiSeq	presence	PP2_PP7	none	none	none	ins	none	none
505	201005812	2.35	2.6	2.475	none	ins	ins		two	sites-2-3	Not available	HiSeq	presence	PP2_PP7	none	none	none	ins	none	none
506	201706695	0.82	0.56	0.69	none	ins	ins		two	sites-2-3	Not available	NextSeq	presence	PP2_PP7	none	none	none	ins	none	none
507	421207	2.69	3	2.845	none	ins	ins		two	sites-2-3	Not available	HiSeq	presence	PP2_PP7	none	none	none	ins	none	none
508	201610803	0.98	0.53	0.755	none	ins	ins		two	sites-2-3	Not available	NextSeq	presence	PP2_PP7	none	none	none	ins	none	none
509	201005693	1.35	0.97	1.16	none	ins	ins		two	sites-2-3	Not available	NextSeq	presence	PP2_PP7	none	none	none	ins	none	none
510	09-6723	2.21	2.26	2.235	none	ins	ins		two	sites-2-3	Not available	HiSeq	presence	PP2_PP7	none	none	none	ins	none	none
511	201508837	1.41	0.89	1.15	none	ins	ins		two	sites-2-3	Not available	NextSeq	presence	PP2_PP7	none	none	none	ins	none	none
512	201807193	1.65	0.82	1.235	none	ins	ins		two	sites-2-3	Not available	NextSeq	presence	PP2_PP7	none	none	none	ins	none	none
513	201006170	2.24	2.44	2.34	none	ins	ins		two	sites-2-3	Not available	HiSeq	presence	PP2_PP7	none	none	none	ins	none	none
514	201005837	2.41	2.67	2.54	none	ins	ins		two	sites-2-3	Not available	HiSeq	presence	PP2_PP7	none	none	none	ins	none	none
515	200704851	1.19	0.56	0.875	none	ins	ins		two	sites-2-3	Not available	NextSeq	presence	PP2_PP7	none	none	none	ins	none	none
516	09-5700	2.12	1.85	1.985	none	ins	ins		two	sites-2-3	Not available	HiSeq	presence	PP2_PP7	none	none	none	ins	none	none
517	201007762	2.08	2.26	2.17	none	ins	ins		two	sites-2-3	Not available	HiSeq	presence	PP2_PP7	none	none	none	ins	none	none
518	200806317	1.1	0.64	0.87	none	ins	ins		two	sites-2-3	Not available	NextSeq	presence	PP2_PP7	none	none	none	ins	none	none
519	201003876	1.8	2.14	1.97	none	ins	ins		two	sites-2-3	Not available	HiSeq	presence	PP2_PP7	none	none	none	ins	none	none
520	H83580298	1.48	1.36	1.42	none	ins	ins		two	sites-2-3	Not available	Genome_Analyzer_II	presence	PP1	none	none	ins	none	none	none
521	201106792	1.55	0.95	1.25	none	ins	ins		two	sites-2-3	Not available	NextSeq	presence	PP2_PP7	none	none	none	ins	none	none
522	201710471	2.54	0.85	1.695	none	ins	ins		two	sites-2-3	Not available	NextSeq	presence	PP2_PP7	none	none	none	ins	none	none
523	201609244	0.82	0.46	0.64	none	ins	ins		two	sites-2-3	Not available	NextSeq	presence	PP2_PP7	none	none	none	ins	none	none
524	09-6106	1.41	0.99	1.2	none	ins	ins		two	sites-2-3	Not available	NextSeq	presence	PP2_PP7	none	none	none	ins	none	none
525	200906025	1.92	0.84	1.38	none	ins	ins		two	sites-2-3	Not available	NextSeq	presence	PP2_PP7	none	none	none	ins	none	none
526	201006689	2.25	2.7	2.475	none	ins	ins		two	sites-2-3	Not available	HiSeq	presence	PP2_PP7	none	none	none	ins	none	none
527	201307935	2.3	2.49	2.395	none	ins	ins		two	sites-2-3	Not available	HiSeq	presence	PP2_PP7	none	none	none	ins	none	none
528	535359	1.36	1.62	1.49	none	ins	none		one	site-2	Not available	HiSeq	presence	PP2_PP7	none	none	none	ins	none	none
529	541373	1.31	1.58	1.445	none	ins	none		one	site-2	Not available	HiSeq	presence	PP2_PP7	none	none	none	ins	none	none
530	452518	1.36	1.44	1.4	none	ins	none		one	site-2	Not available	HiSeq	presence	PP2_PP7	none	none	none	ins	none	none
531	201800797	0.39	0.24	0.315	none	ins	none		one	site-2	Not available	NextSeq	presence	PP2_PP7	none	none	none	ins	none	none
532	529880	1.25	1.47	1.36	none	ins	none		one	site-2	Not available	HiSeq	presence	PP2_PP7	none	none	none	ins	none	none
533	22-80	0.73	0.4	0.565	none	ins	none		one	site-2	Taunton	NextSeq	presence	PP2_PP7	none	none	none	ins	none	none
534	200006752	0.62	0.3	0.46	none	ins	none		one	site-2	Dundee	NextSeq	presence	PP2_PP7	none	none	none	ins	none	none
535	1008776	1.14	0.86	1	none	ins	none		one	site-2	Not available	HiSeq	presence	PP2_PP7	none	none	none	ins	none	none
536	201907724	0.52	0.33	0.425	none	ins	none		one	site-2	Not available	NextSeq	presence	PP2_PP7	none	none	none	ins	none	none
537	B97-8064	0.69	0.32	0.505	none	ins	none		one	site-2	Not available	NextSeq	presence	PP2_PP7	none	none	none	ins	none	none
538	B94-8105	0.43	0.15	0.29	none	ins	none		one	site-2	Dundee	NextSeq	presence	PP2_PP7	none	none	none	ins	none	none
539	200606302	0.57	0.33	0.45	none	ins	none		one	site-2	Not available	NextSeq	presence	PP2_PP7	none	none	none	ins	none	none
540	77-89	1.13	1.28	1.205	none	ins	none		one	site-2	Taunton	HiSeq	presence	PP2_PP7	none	none	none	ins	none	none
541	22-59	0.96	0.4	0.68	none	ins	none		one	site-2	Taunton	NextSeq	presence	PP2_PP7	none	none	none	none	none	none
542	169-74	1.18	1.31	1.245	none	ins	none		one	site-2	Taunton	HiSeq	presence	PP2_PP7	none	none	none	ins	none	none
543	4-57	0.52	0.27	0.395	none	ins	none		one	site-2	Taunton	NextSeq	presence	PP2_PP7	none	none	none	ins	none	none
544	87-76	0.74	0.35	0.545	none	ins	none		one	site-2	Taunton	NextSeq	presence	PP2_PP7	none	none	none	ins	none	none
545	42-84	0.93	0.32	0.625	none	ins	none		one	site-2	Taunton	NextSeq	presence	PP2_PP7	none	none	none	ins	none	none
546	09-1009	1.09	1.2	1.145	none	ins	none		one	site-2	Not available	HiSeq	presence	PP2_PP7	none	none	none	ins	none	none
547	72-74	1.21	1.33	1.27	none	ins	none		one	site-2	Taunton	HiSeq	presence	PP2_PP7	none	none	none	ins	none	none
548	201510469	0.63	0.34	0.485	none	ins	none		one	site-2	Not available	NextSeq	presence	PP2_PP7	none	none	none	ins	none	none
549	201106546	0.41	0.14	0.275	none	ins	none		one	site-2	Not available	NextSeq	presence	PP2_PP7	none	none	none	ins	none	none
550	34-67	1.18	1.35	1.265	none	ins	none		one	site-2	Taunton	HiSeq	presence	PP2	none	none	none	ins	none	none
551	13-59	1.17523	1.28956	1.2324	none	ins	none		one	site-2	Taunton	HiSeq	presence	PP2_PP7	none	none	none	ins	none	none
552	88-84	1.23	1.36	1.295	none	ins	none		one	site-2	Taunton	HiSeq	presence	PP2_PP7	none	none	none	ins	none	none
553	70-86	0.41	0.18	0.295	none	ins	none		one	site-2	3aI	NextSeq	presence	PP2_PP7	none	none	none	ins	none	none
554	45-88	1.04	1.16	1.1	none	ins	none		one	site-2	Taunton	HiSeq	presence	PP2	none	none	none	ins	none	none
555	14-60	0.79	0.35	0.57	none	ins	none		one	site-2	Taunton	NextSeq	presence	PP2_PP7	ins	none	none	ins	none	none
556	44-66	1.97	1.38	1.675	none	ins	none		one	site-2	Taunton	HiSeq	presence	PP2_PP7	none	none	none	ins	none	none
557	88-65	1.14	1.27	1.205	none	ins	none		one	site-2	Taunton	HiSeq	presence	PP2_PP7	none	none	none	ins	none	none
558	89-65	1.16	1.29	1.225	none	ins	none		one	site-2	Taunton	HiSeq	presence	PP2_PP7	none	none	none	ins	none	none
559	2-66	1.15	1.27	1.21	none	ins	none		one	site-2	Taunton	HiSeq	presence	PP2_PP7	none	none	none	none	none	none
560	28-59	1.17	1.27	1.22	none	ins	none		one	site-2	Taunton	HiSeq	presence	PP2_PP7	none	none	none	ins	none	none
561	95-67	1.12	1.24	1.18	none	ins	none		one	site-2	Taunton	HiSeq	presence	PP2_PP7	none	none	none	ins	none	none
562	6-60	1.09	1.22	1.155	none	ins	none		one	site-2	Taunton	HiSeq	presence	PP2_PP7	none	none	none	ins	none	none
563	B90-23	0.33	0.2	0.265	none	ins	none		one	site-2	Taunton	NextSeq	presence	PP2_PP7	no_decision	none	none	ins	none	none
564	24bis-59	0.67	0.27	0.47	none	ins	none		one	site-2	Taunton	NextSeq	presence	PP2_PP7	none	none	none	ins	none	none
565	131-75	1.28	1.39	1.335	none	ins	none		one	site-2	Dundee	HiSeq	presence	PP2_PP7	none	none	none	ins	none	none
566	26-67	1.13	1.29	1.21	none	ins	none		one	site-2	Taunton	HiSeq	presence	PP2_PP7	none	none	none	ins	none	none
567	201705796	0.65	0.45	0.55	none	ins	none		one	site-2	Not available	NextSeq	presence	PP2_PP7	none	none	none	ins	none	none
568	172-74	0.68	0.31	0.495	none	ins	none		one	site-2	Taunton	NextSeq	presence	PP2_PP7	none	none	none	ins	none	none
* The coverage was estimated across the entire genome (cov_g), at the sopE locus (cov_s) and the Pathogenicity Island 1 locus (cov_pi); sopE-CN is the mean of cov_s/cov_pi and cov_s/ cov_g
** was used to underline that a prophage insertion differs from common expections (ins**) or that insertion is unlikely (none**). More details are given in the comments' column.
*** When insertion site occupancy was detected but the coverage data analysis suggests that the insert (prophage) does not carry the SopE gene.
