# Supplementary material for: Genomic perspective on the bacillus causing paratyphoid B fever
Source: Research Square preprint supplement (doi:10.21203/rs.3.rs-4502330/v1), 2024-06-18
Supplement: Supplementary file 3 [file 2aba4be6c359c797178e98f7.xlsx]

## Sheet: Data 8
			PHASTER_predictions (https://phaster.ca/#citation)
Isolate	Insertion site	Delination of the insert at site [attB/attP]*	REGION	REGION_LENGTH	COMPLETENESS(score)	SPECIFIC_KEYWORD	REGION_POSITION	TRNA_NUM	TOTAL_PROTEIN_NUM	PHAGE_HIT_PROTEIN_NUM	HYPOTHETICAL_PROTEIN_NUM	PHAGE+HYPO_PROTEIN_PERCENTAGE	BACTERIAL_PROTEIN_NUM	ATT_SITE_SHOWUP	PHAGE_SPECIES_NUM	MOST_COMMON_PHAGE_NAME(hit_genes_count)	FIRST_MOST_COMMON_PHAGE_NUM	FIRST_MOST_COMMON_PHAGE_PERCENTAGE	GC_PERCENTAGE
63-90	site A [fljB_PP1]	1123292-1155831 [GAGCTGGCGGGAGTTGAACCCGCGTCCGAAATTCCTACATCCTC]	1	38.7kb	intact(94)	lysin	1122230-1161027	0	42	35	7	1	0	yes	8	PHAGE_Cronob_ESSI_2_NC_047854(27),PHAGE_Salmon_SI7_NC_049460(18),PHAGE_Aeromo_phiO18P_NC_009542(11),PHAGE_Haemop_HP1_NC_001697(11),PHAGE_Haemop_HP2_NC_003315(10),PHAGE_Vibrio_1.202.O._10N.222.45.E8_NC_048066(4),PHAGE_Vibrio_K139_NC_003313(4),PHAGE_Pasteu_F108_NC_008193(4),PHAGE_Salmon_SW9_NC_049459(4),PHAGE_Salini_SMHB1_NC_047775(4),PHAGE_Salmon_SEN8_NC_047753(4),PHAGE_Vibrio_8_NC_022747(3),PHAGE…	26	64.28%	50.60%
63-90			2	25.5kb	incomplete(50)	tail	1157392-1182901	0	16	12	4	1	0	no	3	PHAGE_Escher_500465_1_NC_049342(12),PHAGE_Staphy_StauST398_5_NC_023500(1),PHAGE_Bacill_G_NC_023719(1),PHAGE_Klebsi_ST437_OXA245phi4.1_NC_049448(1),PHAGE_Bacill_SPbeta_NC_001884(1),PHAGE_Plankt_PaV_LD_NC_016564(1),PHAGE_Klebsi_ST15_OXA48phi14.1_NC_049454(1),PHAGE_Acinet_vB_AbaM_ME3_NC_041884(1)	10	0.75	54.96%
63-90	not considered (conserved, incomplete or questionable prophage)	-	3	14.2kb	questionable(70)	tail,lysis,capsid	1615314-1629590	0	17	14	3	1	0	no	10	PHAGE_Salmon_118970_sal3_NC_031940(5),PHAGE_Salmon_ST64B_NC_004313(3),PHAGE_Entero_HK140_NC_019710(2),PHAGE_Salmon_Fels_1_NC_010391(2),PHAGE_Phage_Gifsy_2_NC_010393(2),PHAGE_Shigel_SfIV_NC_022749(2),PHAGE_Phage_Gifsy_1_NC_010392(2),PHAGE_Shigel_SfII_NC_021857(2),PHAGE_Entero_PsP3_NC_005340(2),PHAGE_Entero_SfV_NC_003444(2),PHAGE_Salmon_SJ46_NC_031129(2),PHAGE_Lactob_LJ_NC_048680(1),PHAGE_Lactob_BH…	3	29.41%	47.48%
63-90	site B'	1899597-1939047 [CGGTCTCGAAAACCG]	4	46.7kb	intact(97)	integrase,tail	1895316-1942055	0	61	58	3	1	0	yes	7	PHAGE_Salmon_118970_sal3_NC_031940(88),PHAGE_Salmon_ST64B_NC_004313(36),PHAGE_Shigel_SfII_NC_021857(9),PHAGE_Entero_SfI_NC_027339(8),PHAGE_Entero_SfV_NC_003444(7),PHAGE_Entero_phiP27_NC_003356(6),PHAGE_Shigel_SfIV_NC_022749(6),PHAGE_Entero_mEp460_NC_019716(4),PHAGE_Cronob_ENT39118_NC_019934(3),PHAGE_Escher_HK639_NC_016158(2),PHAGE_Salmon_vB_SosS_Oslo_NC_018279(2),PHAGE_Vibrio_VBP32_NC_020868(1),P…	52	144.26%	50.63%
63-90	not considered (conserved, incomplete or questionable prophage)	-	5	11.8kb	incomplete(50)	tail,integrase	2045093-2056965	0	11	6	5	1	0	yes	5	PHAGE_Salmon_SEN1_NC_029003(2),PHAGE_Pseudo_Bjorn_NC_042103(1),PHAGE_Pseudo_PhiPA3_NC_028999(1),PHAGE_Salmon_SW9_NC_049459(1),PHAGE_Salmon_SEN34_NC_028699(1),PHAGE_Salmon_SEN5_NC_028701(1),PHAGE_Ralsto_RSL2_NC_028950(1),PHAGE_Entero_HK106_NC_019768(1),PHAGE_Entero_mEp235_NC_019708(1),PHAGE_Caulob_Sansa_NC_047756(1),PHAGE_Escher_RCS47_NC_042128(1),PHAGE_Phage_Gifsy_1_NC_010392(1),PHAGE_Pseudo_Lu11…	2	18.18%	51.59%
63-90	not considered (conserved, incomplete or questionable prophage)	-	6	12kb	intact(120)	integrase,lysin,tail,terminase	2060712-2072781	0	15	12	3	1	0	yes	5	PHAGE_Salmon_Fels_1_NC_010391(5),PHAGE_Phage_Gifsy_1_NC_010392(3),PHAGE_Phage_Gifsy_2_NC_010393(3),PHAGE_Salmon_SEN5_NC_028701(2),PHAGE_Salmon_SPN1S_NC_016761(2),PHAGE_Entero_mEp213_NC_019720(2),PHAGE_Salmon_SEN4_NC_029015(2),PHAGE_Entero_c_1_NC_019706(2),PHAGE_Salmon_SEN34_NC_028699(1),PHAGE_Salmon_SI7_NC_049460(1),PHAGE_Salmon_epsilon15_NC_004775(1),PHAGE_Entero_HK106_NC_019768(1),PHAGE_Entero_…	7	33.33%	46.21%
63-90	site 1 [SopE]	2898437-2854773 [GCTACATTTTTATAACATG]	7	43kb	intact(140)	tail,plate,head,portal,terminase,lysis,lysin,integrase	2856690-2899781	0	60	57	3	1	0	yes	19	PHAGE_Salmon_SEN34_NC_028699(36),PHAGE_Phage_Gifsy_2_NC_010393(11),PHAGE_Phage_Gifsy_1_NC_010392(8),PHAGE_Salmon_SPN3UB_NC_019545(6),PHAGE_Entero_mEp237_NC_019704(6),PHAGE_Psychr_pOW20_A_NC_020841(6),PHAGE_Salmon_Fels_1_NC_010391(5),PHAGE_Haemop_Aaphi23_NC_004827(5),PHAGE_Aggreg_S1249_NC_013597(4),PHAGE_Salmon_vB_SemP_Emek_NC_018275(3),PHAGE_Vibrio_CP_T1_NC_019457(3),PHAGE_Stx2_c_Stx2a_F451_NC_04…	35	0.6	50.40%
CIP 54.100	site A [fljB_PP1]	1123164-1155694 [GAGCTGGCGGGAGTTGAACCCGCGTCCGAA]	1	38.7kb	questionable(90)	lysin	1122102-1160900	0	41	34	7	1	0	yes	9	PHAGE_Cronob_ESSI_2_NC_047854(26),PHAGE_Salmon_SI7_NC_049460(18),PHAGE_Haemop_HP1_NC_001697(11),PHAGE_Aeromo_phiO18P_NC_009542(11),PHAGE_Haemop_HP2_NC_003315(10),PHAGE_Salini_SMHB1_NC_047775(4),PHAGE_Pasteu_F108_NC_008193(4),PHAGE_Vibrio_1.202.O._10N.222.45.E8_NC_048066(4),PHAGE_Vibrio_K139_NC_003313(4),PHAGE_Klebsi_4LV2017_NC_047818(3),PHAGE_Salmon_SW9_NC_049459(3),PHAGE_Vibrio_8_NC_022747(3),PH…	25	63.41%	50.59%
CIP 54.100			2	25.5kb	incomplete(50)	tail	1157265-1182774	0	16	12	4	1	0	no	3	PHAGE_Escher_500465_1_NC_049342(12),PHAGE_Acinet_vB_AbaM_ME3_NC_041884(1),PHAGE_Staphy_StauST398_5_NC_023500(1),PHAGE_Bacill_G_NC_023719(1),PHAGE_Bacill_SPbeta_NC_001884(1),PHAGE_Plankt_PaV_LD_NC_016564(1),PHAGE_Klebsi_ST437_OXA245phi4.1_NC_049448(1),PHAGE_Klebsi_ST15_OXA48phi14.1_NC_049454(1)	10	0.75	54.95%
CIP 54.100	not considered (conserved, incomplete or questionable prophage)		3	14.2kb	incomplete(60)	tail,lysis,capsid	1609424-1623673	0	17	14	3	1	0	no	8	PHAGE_Salmon_118970_sal3_NC_031940(6),PHAGE_Salmon_ST64B_NC_004313(5),PHAGE_Entero_SfV_NC_003444(3),PHAGE_Phage_Gifsy_1_NC_010392(2),PHAGE_Salmon_Fels_1_NC_010391(2),PHAGE_Salmon_SJ46_NC_031129(2),PHAGE_Phage_Gifsy_2_NC_010393(2),PHAGE_Entero_HK140_NC_019710(2),PHAGE_Entero_mEp390_NC_019721(1),PHAGE_Escher_pro483_NC_028943(1),PHAGE_Escher_P2_NC_041848(1),PHAGE_Entero_c_1_NC_019706(1),PHAGE_Klebsi…	5	35.29%	47.50%
CIP 54.100	site B	1809925-1850691 [GTAATCGTGGAAGAGGAATGT]	4	40.7kb	intact(150)	integrase,tail,lysis,head,capsid,plate	1809957-1850743	0	64	63	1	1	0	yes	15	PHAGE_Salmon_118970_sal3_NC_031940(44),PHAGE_Salmon_ST64B_NC_004313(28),PHAGE_Salmon_SEN34_NC_028699(18),PHAGE_Shigel_SfII_NC_021857(8),PHAGE_Entero_SfI_NC_027339(8),PHAGE_Entero_mEp237_NC_019704(7),PHAGE_Phage_Gifsy_1_NC_010392(7),PHAGE_Salmon_SPN3UB_NC_019545(7),PHAGE_Phage_Gifsy_2_NC_010393(7),PHAGE_Shigel_SfIV_NC_022749(6),PHAGE_Entero_SfV_NC_003444(5),PHAGE_Entero_phiP27_NC_003356(5),PHAGE_E…	31	68.75%	50.49%
CIP 54.100	not considered (conserved, incomplete or questionable prophage)	-	5	11.8kb	incomplete(50)	tail,integrase	2040148-2052020	0	11	6	5	1	0	yes	5	PHAGE_Salmon_SEN1_NC_029003(2),PHAGE_Phage_Gifsy_1_NC_010392(1),PHAGE_Pseudo_Lu11_NC_017972(1),PHAGE_Cronob_vB_CsaM_GAP32_NC_019401(1),PHAGE_Yersin_fHe_Yen9_04_NC_042116(1),PHAGE_Salmon_SEN5_NC_028701(1),PHAGE_Entero_HK106_NC_019768(1),PHAGE_Entero_HK97_NC_002167(1),PHAGE_Ralsto_RSL2_NC_028950(1),PHAGE_Salmon_SEN34_NC_028699(1),PHAGE_Pseudo_PhiPA3_NC_028999(1),PHAGE_Ralsto_RSF1_NC_028899(1),PHAGE…	2	18.18%	51.59%
CIP 54.100	not considered (conserved, incomplete or questionable prophage)	-	6	12kb	intact(120)	integrase,lysin,tail,terminase	2055767-2067833	0	14	12	2	1	0	yes	5	PHAGE_Salmon_Fels_1_NC_010391(5),PHAGE_Phage_Gifsy_2_NC_010393(3),PHAGE_Phage_Gifsy_1_NC_010392(3),PHAGE_Salmon_SEN4_NC_029015(2),PHAGE_Entero_mEp213_NC_019720(2),PHAGE_Salmon_SPN1S_NC_016761(2),PHAGE_Salmon_SEN5_NC_028701(2),PHAGE_Entero_c_1_NC_019706(2),PHAGE_Escher_RCS47_NC_042128(1),PHAGE_Salmon_epsilon15_NC_004775(1),PHAGE_Entero_N15_NC_001901(1),PHAGE_Entero_mEp235_NC_019708(1),PHAGE_Entero…	7	35.71%	46.19%
CIP 54.100	site 1 [SopE]	2895262-2852179 [GCTACATTTTTATAACATG]	7	42.5kb	intact(140)	tail,plate,head,portal,capsid,integrase	2854096-2896606	0	58	53	5	1	0	yes	13	PHAGE_Salmon_SEN34_NC_028699(30),PHAGE_Phage_Gifsy_2_NC_010393(19),PHAGE_Phage_Gifsy_1_NC_010392(15),PHAGE_Salmon_SPN3UB_NC_019545(13),PHAGE_Psychr_pOW20_A_NC_020841(6),PHAGE_Salmon_Fels_1_NC_010391(5),PHAGE_Haemop_Aaphi23_NC_004827(5),PHAGE_Entero_mEp237_NC_019704(5),PHAGE_Entero_HK225_NC_019717(4),PHAGE_Salmon_118970_sal3_NC_031940(4),PHAGE_Aggreg_S1249_NC_013597(4),PHAGE_Vibrio_CP_T1_NC_019457…	30	51.72%	51.40%
CIP 54.100	site C	3307320-3341545 [AAAAAACCCAT]	8	49.4kb	intact(118)	tail	3305159-3354636	0	51	41	10	1	0	yes	6	PHAGE_Klebsi_4LV2017_NC_047818(30),PHAGE_Escher_500465_1_NC_049342(26),PHAGE_Salmon_SEN8_NC_047753(22),PHAGE_Klebsi_ST512_KPC3phi13.2_NC_049452(19),PHAGE_Salmon_Fels_2_NC_010463(19),PHAGE_Klebsi_ST437_OXA245phi4.2_NC_049449(18),PHAGE_Salmon_RE_2010_NC_019488(17),PHAGE_Klebsi_ST15_OXA48phi14.1_NC_049454(7),PHAGE_Klebsi_ST437_OXA245phi4.1_NC_049448(3),PHAGE_Klebsi_ST13_OXA48phi12.1_NC_049453(3),PHA…	15	58.82%	52.09%
CIP 54.100	not considered (conserved, incomplete or questionable prophage)	-	9	5.9kb	incomplete(20)	transposase	3363209-3369158	0	10	6	4	1	0	no	5	PHAGE_Salmon_103203_sal5_NC_031946(2),PHAGE_Salmon_SPN9CC_NC_017985(2),PHAGE_Entero_UAB_Phi20_NC_031019(2),PHAGE_Salmon_118970_sal4_NC_030919(2),PHAGE_Vibrio_Aphrodite1_NC_042100(1),PHAGE_Oenoco_phiS11_NC_023571(1),PHAGE_Salmon_Maynard_NC_022768(1),PHAGE_Photob_PDCC_1_NC_048821(1),PHAGE_Salmon_epsilon34_NC_011976(1),PHAGE_Vibrio_TSL_2019_NC_048747(1),PHAGE_Salmon_maane_NC_049508(1),PHAGE_Oenoco_p…	2	0.2	45.71%
CIP 54.100	site E	4365448-4405105 [TCGAGCATAGG]	10	42kb	intact(150)	integrase,recombinase,tail,lysin,plate,capsid,head,terminase,lysis	4361466-4403562	0	54	50	4	1	0	no	15	PHAGE_Salmon_118970_sal3_NC_031940(43),PHAGE_Salmon_ST64B_NC_004313(26),PHAGE_Entero_SfV_NC_003444(17),PHAGE_Shigel_SfII_NC_021857(17),PHAGE_Entero_mEp460_NC_019716(14),PHAGE_Shigel_SfIV_NC_022749(14),PHAGE_Entero_cdtI_NC_009514(10),PHAGE_Entero_SfI_NC_027339(8),PHAGE_Entero_phiP27_NC_003356(6),PHAGE_Salmon_SJ46_NC_031129(5),PHAGE_Salmon_Fels_2_NC_010463(4),PHAGE_Entero_BP_4795_NC_004813(2),PHAGE…	26	79.62%	51.23%
B76	site A [fljB_PP1]	1123065-1155595 [GAGCTGGCGGGAGTTGAACCCGCGTCCGAA]	1	38.7kb	questionable(90)	lysin	1122003-1160801	0	40	34	6	1	0	yes	9	PHAGE_Cronob_ESSI_2_NC_047854(26),PHAGE_Salmon_SI7_NC_049460(18),PHAGE_Haemop_HP1_NC_001697(11),PHAGE_Aeromo_phiO18P_NC_009542(11),PHAGE_Haemop_HP2_NC_003315(10),PHAGE_Vibrio_1.202.O._10N.222.45.E8_NC_048066(4),PHAGE_Pasteu_F108_NC_008193(4),PHAGE_Salini_SMHB1_NC_047775(4),PHAGE_Vibrio_K139_NC_003313(4),PHAGE_Salmon_SW9_NC_049459(3),PHAGE_Vibrio_8_NC_022747(3),PHAGE_Salmon_SEN8_NC_047753(3),PHAGE…	25	0.65	50.60%
B76			2	25.5kb	incomplete(50)	tail	1157166-1182675	0	16	12	4	1	0	no	3	PHAGE_Escher_500465_1_NC_049342(12),PHAGE_Klebsi_ST15_OXA48phi14.1_NC_049454(1),PHAGE_Acinet_vB_AbaM_ME3_NC_041884(1),PHAGE_Staphy_StauST398_5_NC_023500(1),PHAGE_Bacill_SPbeta_NC_001884(1),PHAGE_Plankt_PaV_LD_NC_016564(1),PHAGE_Klebsi_ST437_OXA245phi4.1_NC_049448(1),PHAGE_Bacill_G_NC_023719(1)	10	0.75	54.95%
B76	not considered (conserved, incomplete or questionable prophage)	-	3	14.2kb	incomplete(60)	tail,lysis,capsid	1609446-1623695	0	17	14	3	1	0	no	8	PHAGE_Salmon_118970_sal3_NC_031940(6),PHAGE_Salmon_ST64B_NC_004313(5),PHAGE_Entero_SfV_NC_003444(3),PHAGE_Salmon_SJ46_NC_031129(2),PHAGE_Phage_Gifsy_2_NC_010393(2),PHAGE_Salmon_Fels_1_NC_010391(2),PHAGE_Entero_HK140_NC_019710(2),PHAGE_Phage_Gifsy_1_NC_010392(2),PHAGE_Lactob_Lrm1_NC_011104(1),PHAGE_Lactob_A2_NC_004112(1),PHAGE_Sodali_phiSG1_NC_007902(1),PHAGE_Entero_HK225_NC_019717(1),PHAGE_Lactob…	5	35.29%	47.50%
B76	not considered (conserved, incomplete or questionable prophage)	-	4	11.8kb	incomplete(50)	tail,integrase	1999385-2011257	0	11	6	5	1	0	yes	5	PHAGE_Salmon_SEN1_NC_029003(2),PHAGE_Cronob_vB_CsaM_GAP32_NC_019401(1),PHAGE_Pseudo_Bjorn_NC_042103(1),PHAGE_Escher_RCS47_NC_042128(1),PHAGE_Entero_HK022_NC_002166(1),PHAGE_Pectob_ZF40_NC_019522(1),PHAGE_Entero_mEp235_NC_019708(1),PHAGE_Caulob_Sansa_NC_047756(1),PHAGE_Yersin_fHe_Yen9_04_NC_042116(1),PHAGE_Salmon_SW9_NC_049459(1),PHAGE_Entero_HK106_NC_019768(1),PHAGE_Pseudo_Lu11_NC_017972(1),PHAGE…	2	18.18%	51.59%
B76	not considered (conserved, incomplete or questionable prophage)	-	5	12kb	intact(120)	integrase,lysin,tail,terminase	2015004-2027070	0	15	12	3	1	0	yes	5	PHAGE_Salmon_Fels_1_NC_010391(5),PHAGE_Phage_Gifsy_1_NC_010392(3),PHAGE_Phage_Gifsy_2_NC_010393(3),PHAGE_Salmon_SEN4_NC_029015(2),PHAGE_Salmon_SEN5_NC_028701(2),PHAGE_Entero_c_1_NC_019706(2),PHAGE_Salmon_SPN1S_NC_016761(2),PHAGE_Entero_mEp213_NC_019720(2),PHAGE_Salmon_SEN34_NC_028699(1),PHAGE_Entero_mEp460_NC_019716(1),PHAGE_Escher_TL_2011b_NC_019445(1),PHAGE_Escher_C130_2_NC_048067(1),PHAGE_Ente…	7	33.33%	46.18%
B76	site 1 [SopE]	2812484-2855567 [GCTACATTTTTATAACATG]	6	44.1kb	intact(140)	tail,plate,head,portal,capsid,integrase	2812804-2856911	0	60	54	6	1	0	yes	14	PHAGE_Salmon_SEN34_NC_028699(30),PHAGE_Phage_Gifsy_2_NC_010393(19),PHAGE_Phage_Gifsy_1_NC_010392(15),PHAGE_Salmon_SPN3UB_NC_019545(13),PHAGE_Psychr_pOW20_A_NC_020841(6),PHAGE_Entero_mEp237_NC_019704(6),PHAGE_Salmon_Fels_1_NC_010391(5),PHAGE_Haemop_Aaphi23_NC_004827(5),PHAGE_Entero_HK225_NC_019717(5),PHAGE_Salmon_118970_sal3_NC_031940(4),PHAGE_Aggreg_S1249_NC_013597(4),PHAGE_Entero_SfV_NC_003444(3…	30	0.5	50.95%
B76	site C	3267626-3301060 [AAAAAACCCAT]	7	48.6kb	intact(118)	tail	3265465-3314151	0	50	40	10	1	0	yes	6	PHAGE_Klebsi_4LV2017_NC_047818(30),PHAGE_Escher_500465_1_NC_049342(25),PHAGE_Salmon_SEN8_NC_047753(20),PHAGE_Klebsi_ST512_KPC3phi13.2_NC_049452(18),PHAGE_Salmon_RE_2010_NC_019488(18),PHAGE_Salmon_Fels_2_NC_010463(18),PHAGE_Klebsi_ST437_OXA245phi4.2_NC_049449(17),PHAGE_Klebsi_ST15_OXA48phi14.1_NC_049454(7),PHAGE_Klebsi_ST437_OXA245phi4.1_NC_049448(3),PHAGE_Klebsi_ST13_OXA48phi12.1_NC_049453(3),PHA…	15	0.6	52.02%
CIP A214	site A [fljB_PP3c]	1120431-1128964	1	41.1kb	incomplete(60)	tail	1114967-1156079	1	30	22	8	1	0	no	4	PHAGE_Escher_500465_1_NC_049342(21),PHAGE_Klebsi_4LV2017_NC_047818(7),PHAGE_Salmon_Fels_2_NC_010463(6),PHAGE_Salmon_SEN8_NC_047753(5),PHAGE_Klebsi_ST15_OXA48phi14.1_NC_049454(3),PHAGE_Klebsi_ST437_OXA245phi4.1_NC_049448(2),PHAGE_Klebsi_ST512_KPC3phi13.2_NC_049452(2),PHAGE_Vibrio_PV94_NC_027368(1),PHAGE_Bacill_G_NC_023719(1),PHAGE_Acinet_vB_AbaM_ME3_NC_041884(1),PHAGE_Mannhe_phiMHaA1_NC_008201(1),…	15	0.7	54.83%
CIP A214	not considered (conserved, incomplete or questionable prophage)	-	2	11.8kb	incomplete(50)	tail,integrase	1973226-1985098	0	11	6	5	1	0	yes	5	PHAGE_Salmon_SEN1_NC_029003(2),PHAGE_Salmon_SEN4_NC_029015(1),PHAGE_Entero_PsP3_NC_005340(1),PHAGE_Entero_lambda_NC_001416(1),PHAGE_Pectob_CBB_NC_041878(1),PHAGE_Entero_HK106_NC_019768(1),PHAGE_Entero_mEp235_NC_019708(1),PHAGE_Salmon_RE_2010_NC_019488(1),PHAGE_Phage_Gifsy_1_NC_010392(1),PHAGE_Entero_P1_NC_005856(1),PHAGE_Ralsto_RSF1_NC_028899(1),PHAGE_Pseudo_H101_NC_029094(1),PHAGE_Salmon_SEN34_N…	2	18.18%	51.60%
CIP A214	not considered (conserved, incomplete or questionable prophage)	-	3	12kb	intact(120)	integrase,lysin,tail,terminase	1988845-2000901	0	15	12	3	1	0	yes	5	PHAGE_Salmon_Fels_1_NC_010391(5),PHAGE_Phage_Gifsy_2_NC_010393(3),PHAGE_Phage_Gifsy_1_NC_010392(3),PHAGE_Salmon_SEN4_NC_029015(2),PHAGE_Entero_c_1_NC_019706(2),PHAGE_Salmon_SEN5_NC_028701(2),PHAGE_Entero_mEp213_NC_019720(2),PHAGE_Entero_Tyrion_NC_031077(2),PHAGE_Entero_IME_EC2_NC_047742(1),PHAGE_Entero_lambda_NC_001416(1),PHAGE_Entero_HK106_NC_019768(1),PHAGE_Entero_mEp235_NC_019708(1),PHAGE_Esch…	7	33.33%	46.21%
CIP A214	site 1 [SopE]	2780441-2823536 [GCTACATTTTTATAACATG]	4	42.5kb	intact(140)	tail,plate,head,portal,capsid,integrase	2782358-2824880	0	56	53	3	1	0	yes	13	PHAGE_Salmon_SEN34_NC_028699(30),PHAGE_Phage_Gifsy_2_NC_010393(19),PHAGE_Phage_Gifsy_1_NC_010392(15),PHAGE_Salmon_SPN3UB_NC_019545(13),PHAGE_Psychr_pOW20_A_NC_020841(6),PHAGE_Entero_mEp237_NC_019704(5),PHAGE_Haemop_Aaphi23_NC_004827(5),PHAGE_Salmon_Fels_1_NC_010391(5),PHAGE_Entero_HK225_NC_019717(4),PHAGE_Salmon_118970_sal3_NC_031940(4),PHAGE_Aggreg_S1249_NC_013597(4),PHAGE_Pectob_ZF40_NC_019522(…	30	53.57%	51.40%
CIP A214	site D	3508594-3549787 [TGCCGATAATAGGAGTCGAACCTACGACCTTCGCATTACGAAT]	5	42.2kb	intact(150)	transposase,tail,head,capsid,coat,portal,terminase,integrase	3507532-3549742	0	52	50	2	1	0	yes	18	PHAGE_Salmon_ST64T_NC_004348(21),PHAGE_Salmon_BTP1_NC_042346(17),PHAGE_Salmon_ST160_NC_014900(15),PHAGE_Salmon_118970_sal4_NC_030919(13),PHAGE_Salmon_vB_SemP_Emek_NC_018275(13),PHAGE_Salmon_SPN9CC_NC_017985(13),PHAGE_Entero_UAB_Phi20_NC_031019(12),PHAGE_Salmon_103203_sal5_NC_031946(9),PHAGE_Salmon_g341c_NC_013059(9),PHAGE_Entero_ST104_NC_005841(9),PHAGE_Salmon_SE1_NC_011802(8),PHAGE_Salmon_vB_Sos…	21	40.38%	47.47%
B624	site A [fljB_PP2]	1123395-1160274 [GAGCTGGCGGGAGTTGAACCA/CGCGTCCGAA]	1	39.5kb	intact(150)	integrase,capsid,lysis,lysin,terminase,head,tail,plate	1123395-1162951	1	51	47	4	1	0	yes	9	PHAGE_Salmon_118970_sal3_NC_031940(58),PHAGE_Salmon_ST64B_NC_004313(32),PHAGE_Shigel_SfII_NC_021857(14),PHAGE_Entero_SfV_NC_003444(12),PHAGE_Shigel_SfIV_NC_022749(10),PHAGE_Entero_SfI_NC_027339(8),PHAGE_Entero_mEp460_NC_019716(7),PHAGE_Entero_phiP27_NC_003356(6),PHAGE_Entero_cdtI_NC_009514(3),PHAGE_Salmon_Fels_1_NC_010391(2),PHAGE_Salmon_SW9_NC_049459(1),PHAGE_Entero_phiEap_3_NC_041980(1),PHAGE_K…	34	113.72%	50.27%
B624	not considered (conserved, incomplete or questionable prophage)	-	2	11.8kb	incomplete(50)	tail,integrase	2004376-2016248	0	11	6	5	1	0	yes	5	PHAGE_Salmon_SEN1_NC_029003(2),PHAGE_Escher_HK639_NC_016158(1),PHAGE_Ralsto_RSL2_NC_028950(1),PHAGE_Salmon_RE_2010_NC_019488(1),PHAGE_Ralsto_RSF1_NC_028899(1),PHAGE_Pectob_ZF40_NC_019522(1),PHAGE_Entero_P1_NC_005856(1),PHAGE_Entero_mEp235_NC_019708(1),PHAGE_Escher_RCS47_NC_042128(1),PHAGE_Entero_PsP3_NC_005340(1),PHAGE_Entero_HK106_NC_019768(1),PHAGE_Entero_lambda_NC_001416(1),PHAGE_Pseudo_Lu11_N…	2	18.18%	51.58%
B624	not considered (conserved, incomplete or questionable prophage)	-	3	12kb	intact(100)	integrase,tail,terminase	2019995-2032050	0	12	10	2	1	0	yes	4	PHAGE_Salmon_Fels_1_NC_010391(4),PHAGE_Phage_Gifsy_2_NC_010393(3),PHAGE_Phage_Gifsy_1_NC_010392(3),PHAGE_Entero_c_1_NC_019706(2),PHAGE_Entero_mEp213_NC_019720(2),PHAGE_Salmon_SEN5_NC_028701(2),PHAGE_Salmon_SEN4_NC_029015(2),PHAGE_Entero_HK022_NC_002166(1),PHAGE_Entero_N15_NC_001901(1),PHAGE_Escher_C130_2_NC_048067(1),PHAGE_Entero_IME_EC2_NC_047742(1),PHAGE_Sinorh_phiM7_NC_041929(1),PHAGE_Entero_l…	6	33.33%	46.20%
B624	not considered (conserved, incomplete or questionable prophage)	-	4	5.8kb	incomplete(20)	transposase	3244415-3250306	0	10	6	4	1	0	no	5	PHAGE_Entero_UAB_Phi20_NC_031019(2),PHAGE_Salmon_SPN9CC_NC_017985(2),PHAGE_Salmon_118970_sal4_NC_030919(2),PHAGE_Salmon_103203_sal5_NC_031946(2),PHAGE_Vibrio_TSL_2019_NC_048747(1),PHAGE_Salmon_Marshall_NC_022772(1),PHAGE_Bordet_vB_BbrM_PHB04_NC_047861(1),PHAGE_Shigel_SfIV_NC_022749(1),PHAGE_Salmon_SenALZ1_NC_049440(1),PHAGE_Salmon_epsilon34_NC_011976(1),PHAGE_Vibrio_Aphrodite1_NC_042100(1),PHAGE_…	2	0.2	45.81%
B624	site D	3495863-3537056 [TGCCGATAATAGGAGTCGAACCTACGACCTTCGCATTACGAAT]	5	42.2kb	intact(150)	transposase,tail,head,capsid,coat,portal,terminase,integrase	3494801-3537011	0	50	48	2	1	0	yes	17	PHAGE_Salmon_ST64T_NC_004348(21),PHAGE_Salmon_BTP1_NC_042346(16),PHAGE_Salmon_ST160_NC_014900(15),PHAGE_Salmon_SPN9CC_NC_017985(13),PHAGE_Salmon_118970_sal4_NC_030919(13),PHAGE_Entero_UAB_Phi20_NC_031019(12),PHAGE_Salmon_vB_SemP_Emek_NC_018275(12),PHAGE_Salmon_103203_sal5_NC_031946(9),PHAGE_Salmon_g341c_NC_013059(9),PHAGE_Salmon_SE1_NC_011802(8),PHAGE_Entero_ST104_NC_005841(8),PHAGE_Salmon_vB_Sos…	21	0.42	47.46%
B624	site 2 [SopE]	3957864-3999199 [TATTATAAA]	6	52.8kb	intact(150)	integrase,capsid,tail,portal,head,plate	3948276-4001117	0	57	50	7	1	0	yes	14	PHAGE_Salmon_SEN34_NC_028699(26),PHAGE_Phage_Gifsy_2_NC_010393(19),PHAGE_Phage_Gifsy_1_NC_010392(15),PHAGE_Salmon_SPN3UB_NC_019545(13),PHAGE_Psychr_pOW20_A_NC_020841(6),PHAGE_Entero_mEp237_NC_019704(5),PHAGE_Haemop_Aaphi23_NC_004827(5),PHAGE_Salmon_Fels_1_NC_010391(5),PHAGE_Entero_HK225_NC_019717(4),PHAGE_Salmon_118970_sal3_NC_031940(4),PHAGE_Aggreg_S1249_NC_013597(3),PHAGE_Vibrio_CP_T1_NC_019457…	26	45.61%	50.27%
B624	site 3 [SopE]	4137773-4172496 [CAACGCCACCCGAGGGTG]	7	35kb	intact(150)	integrase,recombinase,portal,terminase,capsid,head,tail,lysin,plate	4137773-4172798	0	52	47	5	1	0	yes	4	PHAGE_Entero_P88_NC_026014(44),PHAGE_Escher_520873_NC_049344(33),PHAGE_Escher_503458_NC_049341(27),PHAGE_Escher_500465_2_NC_049343(23),PHAGE_Entero_phiT5282H_NC_049429(17),PHAGE_Klebsi_ST16_OXA48phi5.4_NC_049450(9),PHAGE_Klebsi_3LV2017_NC_047817(5),PHAGE_Escher_pro147_NC_028896(4),PHAGE_Salmon_SEN5_NC_028701(3),PHAGE_Escher_pro483_NC_028943(3),PHAGE_Cellul_phi14:2_NC_021806(1),PHAGE_Salmon_SJ46_N…	44	84.61%	52.64%
B624	site F	4700800-4735026	8	46.5kb	intact(114)	protease,tail	4700600-4747194	0	48	40	8	1	0	yes	6	PHAGE_Klebsi_4LV2017_NC_047818(29),PHAGE_Escher_500465_1_NC_049342(25),PHAGE_Salmon_SEN8_NC_047753(21),PHAGE_Salmon_Fels_2_NC_010463(18),PHAGE_Klebsi_ST512_KPC3phi13.2_NC_049452(18),PHAGE_Klebsi_ST437_OXA245phi4.2_NC_049449(18),PHAGE_Salmon_RE_2010_NC_019488(16),PHAGE_Klebsi_ST15_OXA48phi14.1_NC_049454(7),PHAGE_Klebsi_ST13_OXA48phi12.1_NC_049453(4),PHAGE_Klebsi_ST437_OXA245phi4.1_NC_049448(3),PHA…	14	60.41%	51.30%
B62	site A [fljB_PP2]	1123299-1160178 [GAGCTGGCGGGAGTTGAACCA/CGCGTCCGAA]	1	39.5kb	intact(150)	integrase,capsid,lysis,lysin,terminase,head,tail,plate	1123299-1162855	1	49	45	4	1	0	yes	9	PHAGE_Salmon_118970_sal3_NC_031940(55),PHAGE_Salmon_ST64B_NC_004313(32),PHAGE_Shigel_SfII_NC_021857(14),PHAGE_Shigel_SfIV_NC_022749(11),PHAGE_Entero_SfV_NC_003444(10),PHAGE_Entero_SfI_NC_027339(8),PHAGE_Entero_phiP27_NC_003356(6),PHAGE_Entero_mEp460_NC_019716(6),PHAGE_Entero_cdtI_NC_009514(2),PHAGE_Salmon_Fels_1_NC_010391(2),PHAGE_Klebsi_KP15_NC_014036(1),PHAGE_Klebsi_Miro_NC_041981(1),PHAGE_Baci…	33	112.24%	50.27%
B62	not considered (conserved, incomplete or questionable prophage)	-	2	11.8kb	incomplete(50)	tail,integrase	2004272-2016144	0	11	6	5	1	0	yes	5	PHAGE_Salmon_SEN1_NC_029003(2),PHAGE_Entero_PsP3_NC_005340(1),PHAGE_Ralsto_RSF1_NC_028899(1),PHAGE_Yersin_fHe_Yen9_04_NC_042116(1),PHAGE_Escher_HK639_NC_016158(1),PHAGE_Entero_lambda_NC_001416(1),PHAGE_Salmon_SEN34_NC_028699(1),PHAGE_Salmon_SEN5_NC_028701(1),PHAGE_Entero_HK106_NC_019768(1),PHAGE_Salmon_RE_2010_NC_019488(1),PHAGE_Pectob_ZF40_NC_019522(1),PHAGE_Phage_Gifsy_1_NC_010392(1),PHAGE_Pseu…	2	18.18%	51.59%
B62	not considered (conserved, incomplete or questionable prophage)	-	3	12kb	intact(110)	integrase,lysin,tail,terminase	2019891-2031945	0	13	11	2	1	0	yes	4	PHAGE_Salmon_Fels_1_NC_010391(5),PHAGE_Phage_Gifsy_1_NC_010392(3),PHAGE_Phage_Gifsy_2_NC_010393(3),PHAGE_Salmon_SEN4_NC_029015(2),PHAGE_Salmon_SPN1S_NC_016761(2),PHAGE_Entero_c_1_NC_019706(2),PHAGE_Entero_mEp213_NC_019720(2),PHAGE_Salmon_SEN5_NC_028701(2),PHAGE_Entero_cdtI_NC_009514(1),PHAGE_Entero_mEp235_NC_019708(1),PHAGE_Sinorh_phiM7_NC_041929(1),PHAGE_Entero_HK97_NC_002167(1),PHAGE_Entero_IME…	7	38.46%	46.21%
B62	site 2 [SopE]	3917378-3961318 [TATTATAAA]	4	55.4kb	intact(150)	integrase,capsid,tail,portal,head,plate	3907789-3963237	0	60	55	5	1	0	yes	14	PHAGE_Salmon_SEN34_NC_028699(31),PHAGE_Phage_Gifsy_2_NC_010393(19),PHAGE_Phage_Gifsy_1_NC_010392(15),PHAGE_Salmon_SPN3UB_NC_019545(13),PHAGE_Psychr_pOW20_A_NC_020841(7),PHAGE_Haemop_Aaphi23_NC_004827(5),PHAGE_Entero_mEp237_NC_019704(5),PHAGE_Salmon_Fels_1_NC_010391(5),PHAGE_Salmon_118970_sal3_NC_031940(4),PHAGE_Entero_HK225_NC_019717(4),PHAGE_Vibrio_CP_T1_NC_019457(3),PHAGE_Pectob_ZF40_NC_019522(…	31	51.66%	50.49%
B97	site A [PP3a_PP2_fljB_PP3b]	1119776-1194451	1	81.2kb	intact(130)	lysin,tail,head,terminase,capsid,integrase	1111975-1193196	0	103	93	10	1	0	yes	20	PHAGE_Salmon_118970_sal3_NC_031940(56),PHAGE_Salmon_ST64B_NC_004313(32),PHAGE_Klebsi_4LV2017_NC_047818(28),PHAGE_Escher_500465_1_NC_049342(27),PHAGE_Salmon_Fels_2_NC_010463(26),PHAGE_Salmon_RE_2010_NC_019488(24),PHAGE_Salmon_SEN8_NC_047753(21),PHAGE_Klebsi_ST512_KPC3phi13.2_NC_049452(18),PHAGE_Klebsi_ST437_OXA245phi4.2_NC_049449(16),PHAGE_Shigel_SfII_NC_021857(14),PHAGE_Klebsi_ST15_OXA48phi14.1_N…	25	54.36%	51.13%
B97			2	25.5kb	incomplete(50)	tail	1196012-1221520	0	16	12	4	1	0	no	3	PHAGE_Escher_500465_1_NC_049342(12),PHAGE_Klebsi_ST437_OXA245phi4.1_NC_049448(1),PHAGE_Bacill_G_NC_023719(1),PHAGE_Klebsi_ST15_OXA48phi14.1_NC_049454(1),PHAGE_Acinet_vB_AbaM_ME3_NC_041884(1),PHAGE_Bacill_SPbeta_NC_001884(1),PHAGE_Plankt_PaV_LD_NC_016564(1),PHAGE_Staphy_StauST398_5_NC_023500(1)	10	0.75	54.96%
B97	not considered (conserved, incomplete or questionable prophage)	-	3	11.8kb	incomplete(50)	tail,integrase	2038533-2050405	0	11	6	5	1	0	yes	5	PHAGE_Salmon_SEN1_NC_029003(2),PHAGE_Salmon_RE_2010_NC_019488(1),PHAGE_Entero_HK022_NC_002166(1),PHAGE_Salmon_SEN5_NC_028701(1),PHAGE_Pectob_ZF40_NC_019522(1),PHAGE_Ralsto_RSF1_NC_028899(1),PHAGE_Entero_P1_NC_005856(1),PHAGE_Escher_HK639_NC_016158(1),PHAGE_Pseudo_H101_NC_029094(1),PHAGE_Entero_mEp235_NC_019708(1),PHAGE_Pseudo_PhiPA3_NC_028999(1),PHAGE_Phage_Gifsy_1_NC_010392(1),PHAGE_Entero_PsP3_…	2	18.18%	51.59%
B97	not considered (conserved, incomplete or questionable prophage)	-	4	12kb	intact(100)	integrase,tail,terminase	2054152-2066208	0	13	10	3	1	0	yes	4	PHAGE_Salmon_Fels_1_NC_010391(4),PHAGE_Phage_Gifsy_1_NC_010392(3),PHAGE_Phage_Gifsy_2_NC_010393(3),PHAGE_Salmon_SEN5_NC_028701(2),PHAGE_Salmon_SEN4_NC_029015(2),PHAGE_Entero_c_1_NC_019706(2),PHAGE_Entero_mEp213_NC_019720(2),PHAGE_Escher_TL_2011b_NC_019445(1),PHAGE_Entero_HK022_NC_002166(1),PHAGE_Klebsi_vB_KpnS_IME279_NC_047862(1),PHAGE_Escher_C130_2_NC_048067(1),PHAGE_Entero_mEp460_NC_019716(1),P…	6	30.76%	46.21%
B97	site 2 [SopE]	3951449-3995391 [TATTATAAA]	5	55.4kb	intact(150)	integrase,capsid,tail,portal,head,plate	3941861-3997309	0	61	55	6	1	0	yes	14	PHAGE_Salmon_SEN34_NC_028699(31),PHAGE_Phage_Gifsy_2_NC_010393(19),PHAGE_Phage_Gifsy_1_NC_010392(15),PHAGE_Salmon_SPN3UB_NC_019545(13),PHAGE_Psychr_pOW20_A_NC_020841(7),PHAGE_Haemop_Aaphi23_NC_004827(5),PHAGE_Salmon_Fels_1_NC_010391(5),PHAGE_Entero_mEp237_NC_019704(5),PHAGE_Salmon_118970_sal3_NC_031940(4),PHAGE_Entero_HK225_NC_019717(4),PHAGE_Aggreg_S1249_NC_013597(3),PHAGE_Pectob_ZF40_NC_019522(…	31	50.81%	50.48%
B1727	not considered (conserved, incomplete or questionable prophage)	-	1	25.5kb	incomplete(50)	tail	1124126-1149635	0	16	12	4	1	0	no	3	PHAGE_Escher_500465_1_NC_049342(12),PHAGE_Plankt_PaV_LD_NC_016564(1),PHAGE_Bacill_SPbeta_NC_001884(1),PHAGE_Klebsi_ST15_OXA48phi14.1_NC_049454(1),PHAGE_Acinet_vB_AbaM_ME3_NC_041884(1),PHAGE_Bacill_G_NC_023719(1),PHAGE_Staphy_StauST398_5_NC_023500(1),PHAGE_Klebsi_ST437_OXA245phi4.1_NC_049448(1)	10	0.75	54.97%
B1727	not considered (conserved, incomplete or questionable prophage)	-	2	11.8kb	incomplete(50)	tail,integrase	1965608-1977480	0	11	6	5	1	0	yes	5	PHAGE_Salmon_SEN1_NC_029003(2),PHAGE_Entero_HK022_NC_002166(1),PHAGE_Escher_HK639_NC_016158(1),PHAGE_Ralsto_RSL2_NC_028950(1),PHAGE_Phage_Gifsy_1_NC_010392(1),PHAGE_Entero_HK97_NC_002167(1),PHAGE_Pseudo_Lu11_NC_017972(1),PHAGE_Pseudo_Bjorn_NC_042103(1),PHAGE_Entero_lambda_NC_001416(1),PHAGE_Escher_RCS47_NC_042128(1),PHAGE_Salmon_SEN34_NC_028699(1),PHAGE_Salmon_SEN5_NC_028701(1),PHAGE_Ralsto_RSF1_…	2	18.18%	51.59%
B1727	not considered (conserved, incomplete or questionable prophage)	-	3	12kb	intact(110)	integrase,lysin,tail,terminase	1981227-1993283	0	15	11	4	1	0	yes	5	PHAGE_Salmon_Fels_1_NC_010391(5),PHAGE_Phage_Gifsy_1_NC_010392(3),PHAGE_Phage_Gifsy_2_NC_010393(3),PHAGE_Salmon_SEN4_NC_029015(2),PHAGE_Entero_mEp213_NC_019720(2),PHAGE_Entero_Tyrion_NC_031077(2),PHAGE_Entero_c_1_NC_019706(2),PHAGE_Salmon_SEN5_NC_028701(2),PHAGE_Entero_cdtI_NC_009514(1),PHAGE_Entero_HK106_NC_019768(1),PHAGE_Entero_mEp235_NC_019708(1),PHAGE_Salmon_SPN1S_NC_016761(1),PHAGE_Sinorh_p…	6	33.33%	46.20%
B1727	site D	3458618-3499811 [TGCCGATAATAGGAGTCGAACCTACGACCTTCGCATTACGAAT]	4	42.2kb	intact(150)	transposase,tail,head,capsid,coat,portal,terminase,integrase	3457556-3499766	0	53	52	1	1	0	yes	19	PHAGE_Salmon_ST64T_NC_004348(20),PHAGE_Salmon_BTP1_NC_042346(18),PHAGE_Salmon_ST160_NC_014900(17),PHAGE_Salmon_SPN9CC_NC_017985(13),PHAGE_Entero_UAB_Phi20_NC_031019(13),PHAGE_Salmon_vB_SemP_Emek_NC_018275(13),PHAGE_Salmon_118970_sal4_NC_030919(13),PHAGE_Entero_ST104_NC_005841(10),PHAGE_Salmon_SE1_NC_011802(10),PHAGE_Salmon_g341c_NC_013059(9),PHAGE_Salmon_103203_sal5_NC_031946(9),PHAGE_Entero_P22_…	20	37.73%	47.46%
B1727	site 2 [SopE]	3920599-3964541 [TATTATAAA]	5	55.4kb	intact(140)	integrase,capsid,tail,portal,head,plate	3911011-3966459	0	63	55	8	1	0	yes	14	PHAGE_Salmon_SEN34_NC_028699(31),PHAGE_Phage_Gifsy_2_NC_010393(19),PHAGE_Phage_Gifsy_1_NC_010392(15),PHAGE_Salmon_SPN3UB_NC_019545(13),PHAGE_Psychr_pOW20_A_NC_020841(7),PHAGE_Salmon_Fels_1_NC_010391(5),PHAGE_Entero_mEp237_NC_019704(5),PHAGE_Haemop_Aaphi23_NC_004827(5),PHAGE_Salmon_118970_sal3_NC_031940(4),PHAGE_Entero_HK225_NC_019717(4),PHAGE_Entero_SfV_NC_003444(3),PHAGE_Aggreg_S1249_NC_013597(3…	31	49.2%	50.48%
SARA41	site A [fljB_PP2]	1123411-1160291 [GAGCTGGCGGGAGTTGAACCCGCGTCCGAA]	1	39.5kb	intact(150)	integrase,capsid,lysis,lysin,terminase,head,tail,plate	1123411-1162968	1	50	46	4	1	0	yes	9	PHAGE_Salmon_118970_sal3_NC_031940(56),PHAGE_Salmon_ST64B_NC_004313(32),PHAGE_Shigel_SfII_NC_021857(14),PHAGE_Shigel_SfIV_NC_022749(11),PHAGE_Entero_SfV_NC_003444(11),PHAGE_Entero_SfI_NC_027339(8),PHAGE_Entero_mEp460_NC_019716(7),PHAGE_Entero_phiP27_NC_003356(6),PHAGE_Entero_cdtI_NC_009514(3),PHAGE_Salmon_Fels_1_NC_010391(2),PHAGE_Klebsi_Miro_NC_041981(1),PHAGE_Salmon_SJ46_NC_031129(1),PHAGE_Kleb…	33	1.12	0.5028
SARA41	not considered (conserved, incomplete or questionable prophage)	-	2	11.8kb	incomplete(50)	tail,integrase	2004384-2016256	0	11	6	5	1	0	yes	5	PHAGE_Salmon_SEN1_NC_029003(2),PHAGE_Entero_HK022_NC_002166(1),PHAGE_Entero_HK97_NC_002167(1),PHAGE_Pectob_CBB_NC_041878(1),PHAGE_Salmon_SEN5_NC_028701(1),PHAGE_Entero_P1_NC_005856(1),PHAGE_Pectob_ZF40_NC_019522(1),PHAGE_Yersin_fHe_Yen9_04_NC_042116(1),PHAGE_Escher_HK639_NC_016158(1),PHAGE_Cronob_vB_CsaM_GAP32_NC_019401(1),PHAGE_Pseudo_H101_NC_029094(1),PHAGE_Entero_lambda_NC_001416(1),PHAGE_Pseu…	2	0.1818	0.5158
SARA41	not considered (conserved, incomplete or questionable prophage)	-	3	12kb	intact(100)	integrase,tail,terminase	2020003-2032059	0	12	10	2	1	0	yes	4	PHAGE_Salmon_Fels_1_NC_010391(4),PHAGE_Phage_Gifsy_2_NC_010393(3),PHAGE_Phage_Gifsy_1_NC_010392(3),PHAGE_Salmon_SEN4_NC_029015(2),PHAGE_Entero_mEp213_NC_019720(2),PHAGE_Entero_c_1_NC_019706(2),PHAGE_Salmon_SEN5_NC_028701(2),PHAGE_Entero_mEp460_NC_019716(1),PHAGE_Entero_mEp235_NC_019708(1),PHAGE_Klebsi_vB_KpnS_IME279_NC_047862(1),PHAGE_Salmon_SI7_NC_049460(1),PHAGE_Entero_HK106_NC_019768(1),PHAGE_…	6	0.3333	0.462
SARA41	site D	3496436-3537629 [TGCCGATAATAGGAGTCGAACCTACGACCTTCGCATTACGAAT]	4	42.2kb	intact(150)	transposase,tail,head,capsid,coat,portal,terminase,integrase	3495374-3537584	0	49	47	2	1	0	yes	17	PHAGE_Salmon_ST64T_NC_004348(21),PHAGE_Salmon_BTP1_NC_042346(16),PHAGE_Salmon_ST160_NC_014900(15),PHAGE_Salmon_SPN9CC_NC_017985(13),PHAGE_Salmon_118970_sal4_NC_030919(13),PHAGE_Salmon_vB_SemP_Emek_NC_018275(12),PHAGE_Entero_UAB_Phi20_NC_031019(11),PHAGE_Salmon_103203_sal5_NC_031946(9),PHAGE_Salmon_g341c_NC_013059(9),PHAGE_Entero_ST104_NC_005841(8),PHAGE_Salmon_SE1_NC_011802(8),PHAGE_Salmon_vB_Sos…	21	0.4285	0.4746
SARA41	site 2 [SopE]	3958419-4001709 [TATTATAAA]	5	54.7kb	intact(140)	integrase,lysin,lysis,terminase,portal,head,tail,plate	3948831-4003627	0	61	57	4	1	0	yes	14	PHAGE_Salmon_SEN34_NC_028699(37),PHAGE_Phage_Gifsy_2_NC_010393(15),PHAGE_Phage_Gifsy_1_NC_010392(12),PHAGE_Salmon_SPN3UB_NC_019545(10),PHAGE_Psychr_pOW20_A_NC_020841(7),PHAGE_Entero_mEp237_NC_019704(6),PHAGE_Salmon_Fels_1_NC_010391(5),PHAGE_Haemop_Aaphi23_NC_004827(4),PHAGE_Aggreg_S1249_NC_013597(3),PHAGE_Salmon_SPN1S_NC_016761(3),PHAGE_Salmon_SJ46_NC_031129(3),PHAGE_Salmon_ST64B_NC_004313(3),PHA…	37	0.6065	0.5021
B2227	site A [fljB_PP2]	1123371 -1160251 [GAGCTGGCGGGAGTTGAACCCGCGTCCGAA]	1	39.5kb	intact(150)	integrase,capsid,lysis,lysin,terminase,head,tail,plate	1123371-1162928	1	49	45	4	1	0	yes	9	PHAGE_Salmon_118970_sal3_NC_031940(55),PHAGE_Salmon_ST64B_NC_004313(32),PHAGE_Shigel_SfII_NC_021857(14),PHAGE_Shigel_SfIV_NC_022749(11),PHAGE_Entero_SfV_NC_003444(10),PHAGE_Entero_SfI_NC_027339(8),PHAGE_Entero_mEp460_NC_019716(6),PHAGE_Entero_phiP27_NC_003356(6),PHAGE_Entero_cdtI_NC_009514(2),PHAGE_Salmon_Fels_1_NC_010391(2),PHAGE_Pseudo_phiCTX_NC_003278(1),PHAGE_Klebsi_Matisse_NC_028750(1),PHAGE…	33	112.24%	50.27%
B2227	not considered (conserved, incomplete or questionable prophage)	-	2	11.8kb	incomplete(50)	tail,integrase	2003695-2015567	0	11	6	5	1	0	yes	5	PHAGE_Salmon_SEN1_NC_029003(2),PHAGE_Escher_HK639_NC_016158(1),PHAGE_Caulob_Sansa_NC_047756(1),PHAGE_Salmon_SEN34_NC_028699(1),PHAGE_Salmon_RE_2010_NC_019488(1),PHAGE_Pseudo_H101_NC_029094(1),PHAGE_Salmon_SEN5_NC_028701(1),PHAGE_Pectob_CBB_NC_041878(1),PHAGE_Salmon_SEN4_NC_029015(1),PHAGE_Entero_HK106_NC_019768(1),PHAGE_Entero_mEp235_NC_019708(1),PHAGE_Entero_PsP3_NC_005340(1),PHAGE_Phage_Gifsy_1…	2	18.18%	51.59%
B2227	not considered (conserved, incomplete or questionable prophage)	-	3	12kb	intact(110)	integrase,lysin,tail,terminase	2019314-2031369	0	13	11	2	1	0	yes	4	PHAGE_Salmon_Fels_1_NC_010391(5),PHAGE_Phage_Gifsy_1_NC_010392(3),PHAGE_Phage_Gifsy_2_NC_010393(3),PHAGE_Entero_c_1_NC_019706(2),PHAGE_Salmon_SEN4_NC_029015(2),PHAGE_Salmon_SEN5_NC_028701(2),PHAGE_Entero_mEp213_NC_019720(2),PHAGE_Salmon_SPN1S_NC_016761(2),PHAGE_Entero_IME_EC2_NC_047742(1),PHAGE_Salmon_epsilon15_NC_004775(1),PHAGE_Entero_mEp235_NC_019708(1),PHAGE_Entero_HK106_NC_019768(1),PHAGE_Si…	7	38.46%	46.20%
B2227	site 2 [SopE]	3914035-3958649 [TATTATAAA]	4	56.1kb	intact(140)	integrase,lysin,lysis,terminase,portal,head,tail,plate	3904446-3960567	0	65	59	6	1	0	yes	15	PHAGE_Salmon_SEN34_NC_028699(39),PHAGE_Phage_Gifsy_2_NC_010393(15),PHAGE_Phage_Gifsy_1_NC_010392(12),PHAGE_Salmon_SPN3UB_NC_019545(11),PHAGE_Entero_mEp237_NC_019704(8),PHAGE_Psychr_pOW20_A_NC_020841(7),PHAGE_Salmon_Fels_1_NC_010391(5),PHAGE_Haemop_Aaphi23_NC_004827(4),PHAGE_Salmon_ST64B_NC_004313(3),PHAGE_Entero_YYZ_2008_NC_011356(3),PHAGE_Salmon_SJ46_NC_031129(3),PHAGE_Salmon_SPN1S_NC_016761(3),…	38	0.6	50.08%
B2227	site 3 [SopE]	4097225-4131947 [CACCC(GA)/(TC)GGGTGGCG]	5	35.8kb	intact(150)	tail,lysin,plate,head,terminase,capsid,portal,recombinase,integrase	4096353-4132246	0	50	46	4	1	0	yes	3	PHAGE_Entero_P88_NC_026014(44),PHAGE_Escher_520873_NC_049344(32),PHAGE_Escher_503458_NC_049341(27),PHAGE_Escher_500465_2_NC_049343(22),PHAGE_Entero_phiT5282H_NC_049429(16),PHAGE_Klebsi_ST16_OXA48phi5.4_NC_049450(9),PHAGE_Klebsi_3LV2017_NC_047817(5),PHAGE_Escher_pro147_NC_028896(4),PHAGE_Salmon_SEN5_NC_028701(3),PHAGE_Escher_pro483_NC_028943(3),PHAGE_Entero_P2_NC_001895(2),PHAGE_Entero_WPhi_NC_005…	44	0.88	52.52%
B2590	site A [fljB_PP2]	1123413-1160293 [GAGCTGGCGGGAGTTGAACCCGCGTCCGAA]	1	39.5kb	intact(150)	integrase,capsid,lysis,lysin,terminase,head,tail,plate	1123413-1162970	1	49	45	4	1	0	yes	9	PHAGE_Salmon_118970_sal3_NC_031940(55),PHAGE_Salmon_ST64B_NC_004313(32),PHAGE_Shigel_SfII_NC_021857(14),PHAGE_Shigel_SfIV_NC_022749(11),PHAGE_Entero_SfV_NC_003444(10),PHAGE_Entero_SfI_NC_027339(8),PHAGE_Entero_phiP27_NC_003356(6),PHAGE_Entero_mEp460_NC_019716(6),PHAGE_Salmon_Fels_1_NC_010391(2),PHAGE_Entero_cdtI_NC_009514(2),PHAGE_Klebsi_Matisse_NC_028750(1),PHAGE_Salmon_SJ46_NC_031129(1),PHAGE_E…	33	112.24%	50.28%
B2590	not considered (conserved, incomplete or questionable prophage)	-	2	11.8kb	incomplete(50)	tail,integrase	2004395-2016267	0	11	6	5	1	0	yes	5	PHAGE_Salmon_SEN1_NC_029003(2),PHAGE_Pectob_CBB_NC_041878(1),PHAGE_Entero_HK106_NC_019768(1),PHAGE_Entero_mEp235_NC_019708(1),PHAGE_Escher_HK639_NC_016158(1),PHAGE_Entero_HK022_NC_002166(1),PHAGE_Ralsto_RSF1_NC_028899(1),PHAGE_Salmon_SEN4_NC_029015(1),PHAGE_Yersin_fHe_Yen9_04_NC_042116(1),PHAGE_Pseudo_Lu11_NC_017972(1),PHAGE_Escher_RCS47_NC_042128(1),PHAGE_Entero_P1_NC_005856(1),PHAGE_Pectob_ZF40…	2	18.18%	51.59%
B2590	not considered (conserved, incomplete or questionable prophage)	-	3	12kb	intact(120)	integrase,lysin,tail,terminase	2020014-2032070	0	14	12	2	1	0	yes	5	PHAGE_Salmon_Fels_1_NC_010391(5),PHAGE_Phage_Gifsy_1_NC_010392(3),PHAGE_Phage_Gifsy_2_NC_010393(3),PHAGE_Entero_mEp213_NC_019720(2),PHAGE_Entero_c_1_NC_019706(2),PHAGE_Salmon_SEN5_NC_028701(2),PHAGE_Salmon_SEN4_NC_029015(2),PHAGE_Salmon_SPN1S_NC_016761(2),PHAGE_Escher_C130_2_NC_048067(1),PHAGE_Klebsi_vB_KpnS_IME279_NC_047862(1),PHAGE_Salmon_ST64B_NC_004313(1),PHAGE_Salmon_SEN34_NC_028699(1),PHAGE…	7	35.71%	46.21%
B2590	site 1 [SopE]	2811536-2855522 [GCTACATTTTTATAACATG]	4	43.4kb	intact(150)	tail,plate,head,portal,capsid,integrase	2813452-2856866	0	61	56	5	1	0	yes	16	PHAGE_Salmon_SEN34_NC_028699(33),PHAGE_Phage_Gifsy_2_NC_010393(14),PHAGE_Phage_Gifsy_1_NC_010392(10),PHAGE_Salmon_SPN3UB_NC_019545(10),PHAGE_Psychr_pOW20_A_NC_020841(7),PHAGE_Haemop_Aaphi23_NC_004827(6),PHAGE_Salmon_118970_sal3_NC_031940(5),PHAGE_Salmon_Fels_1_NC_010391(5),PHAGE_Pectob_ZF40_NC_019522(4),PHAGE_Aggreg_S1249_NC_013597(4),PHAGE_Entero_YYZ_2008_NC_011356(3),PHAGE_Entero_SfV_NC_003444(…	35	54.09%	50.31%
B2590	site D	3540580-3581773 [TGCCGATAATAGGAGTCGAACCTACGACCTTCGCATTACGAAT]	5	42.2kb	intact(150)	transposase,tail,head,capsid,coat,portal,terminase,integrase	3539518-3581728	0	51	48	3	1	0	yes	17	PHAGE_Salmon_ST64T_NC_004348(20),PHAGE_Salmon_BTP1_NC_042346(17),PHAGE_Salmon_ST160_NC_014900(15),PHAGE_Salmon_SPN9CC_NC_017985(14),PHAGE_Salmon_vB_SemP_Emek_NC_018275(13),PHAGE_Salmon_118970_sal4_NC_030919(13),PHAGE_Entero_UAB_Phi20_NC_031019(11),PHAGE_Salmon_SE1_NC_011802(9),PHAGE_Salmon_103203_sal5_NC_031946(9),PHAGE_Entero_ST104_NC_005841(9),PHAGE_Salmon_g341c_NC_013059(9),PHAGE_Salmon_SEN22_…	20	39.21%	47.46%
B2590	site 2 [SopE]	4002562-4043811 [TATTATAAA]	6	52.7kb	intact(150)	integrase,capsid,tail,lysin,lysis,terminase,portal,head,plate	3992973-4045730	0	59	52	7	1	0	yes	13	PHAGE_Salmon_SEN34_NC_028699(29),PHAGE_Phage_Gifsy_2_NC_010393(17),PHAGE_Phage_Gifsy_1_NC_010392(14),PHAGE_Salmon_SPN3UB_NC_019545(10),PHAGE_Psychr_pOW20_A_NC_020841(6),PHAGE_Salmon_Fels_1_NC_010391(5),PHAGE_Haemop_Aaphi23_NC_004827(4),PHAGE_Aggreg_S1249_NC_013597(4),PHAGE_Entero_mEp237_NC_019704(4),PHAGE_Vibrio_CP_T1_NC_019457(3),PHAGE_Pectob_ZF40_NC_019522(3),PHAGE_Entero_HK225_NC_019717(3),PHA…	29	49.15%	50.90%
B2590	site 3 [SopE]	4182383-4217105 [CGCCACCCGAGGGTG]	7	35kb	intact(150)	integrase,recombinase,portal,terminase,capsid,head,tail,lysin,plate	4182383-4217407	0	52	47	5	1	0	yes	4	PHAGE_Entero_P88_NC_026014(44),PHAGE_Escher_520873_NC_049344(33),PHAGE_Escher_503458_NC_049341(27),PHAGE_Escher_500465_2_NC_049343(23),PHAGE_Entero_phiT5282H_NC_049429(18),PHAGE_Klebsi_ST16_OXA48phi5.4_NC_049450(9),PHAGE_Klebsi_3LV2017_NC_047817(5),PHAGE_Escher_pro147_NC_028896(4),PHAGE_Escher_pro483_NC_028943(3),PHAGE_Salmon_SEN5_NC_028701(3),PHAGE_Entero_P2_NC_001895(2),PHAGE_Entero_mEp213_NC_0…	44	84.61%	52.63%
B1655	site A [fljB_PP2_PP3]	1123362-1194275 [GAGCTGGCGGGAGTTGAACCA/CGCGTCCGAA]	1	70.8kb	intact(150)	integrase,tail,capsid,lysin,terminase,head,plate,lysis	1123362-1194246	0	94	90	4	1	0	yes	12	PHAGE_Salmon_118970_sal3_NC_031940(56),PHAGE_Salmon_RE_2010_NC_019488(42),PHAGE_Salmon_Fels_2_NC_010463(35),PHAGE_Salmon_ST64B_NC_004313(32),PHAGE_Salmon_SEN8_NC_047753(31),PHAGE_Escher_500465_1_NC_049342(16),PHAGE_Klebsi_ST437_OXA245phi4.2_NC_049449(15),PHAGE_Klebsi_4LV2017_NC_047818(14),PHAGE_Shigel_SfII_NC_021857(13),PHAGE_Klebsi_ST512_KPC3phi13.2_NC_049452(13),PHAGE_Klebsi_ST15_OXA48phi14.1_N…	42	59.57%	50.46%
B1655			2	25.5kb	incomplete(50)	tail	1195846-1221353	0	16	12	4	1	0	no	3	PHAGE_Escher_500465_1_NC_049342(12),PHAGE_Bacill_SPbeta_NC_001884(1),PHAGE_Plankt_PaV_LD_NC_016564(1),PHAGE_Klebsi_ST437_OXA245phi4.1_NC_049448(1),PHAGE_Klebsi_ST15_OXA48phi14.1_NC_049454(1),PHAGE_Bacill_G_NC_023719(1),PHAGE_Acinet_vB_AbaM_ME3_NC_041884(1),PHAGE_Staphy_StauST398_5_NC_023500(1)	10	0.75	54.97%
B1655	not considered (conserved, incomplete or questionable prophage)	-	3	11.8kb	incomplete(50)	tail,integrase	2038350-2050222	0	11	6	5	1	0	yes	5	PHAGE_Salmon_SEN1_NC_029003(2),PHAGE_Yersin_fHe_Yen9_04_NC_042116(1),PHAGE_Escher_RCS47_NC_042128(1),PHAGE_Entero_P1_NC_005856(1),PHAGE_Salmon_SEN4_NC_029015(1),PHAGE_Pseudo_PhiPA3_NC_028999(1),PHAGE_Caulob_Sansa_NC_047756(1),PHAGE_Ralsto_RSF1_NC_028899(1),PHAGE_Salmon_SEN5_NC_028701(1),PHAGE_Ralsto_RSL2_NC_028950(1),PHAGE_Pectob_CBB_NC_041878(1),PHAGE_Entero_lambda_NC_001416(1),PHAGE_Escher_HK63…	2	18.18%	51.59%
B1655	not considered (conserved, incomplete or questionable prophage)	-	4	12kb	questionable(90)	integrase,tail,terminase	2053968-2066023	0	12	9	3	1	0	yes	4	PHAGE_Salmon_Fels_1_NC_010391(4),PHAGE_Phage_Gifsy_1_NC_010392(3),PHAGE_Entero_c_1_NC_019706(2),PHAGE_Entero_mEp213_NC_019720(2),PHAGE_Phage_Gifsy_2_NC_010393(2),PHAGE_Salmon_SEN5_NC_028701(2),PHAGE_Salmon_SEN4_NC_029015(2),PHAGE_Salmon_SI7_NC_049460(1),PHAGE_Entero_HK022_NC_002166(1),PHAGE_Salmon_SPN1S_NC_016761(1),PHAGE_Entero_HK106_NC_019768(1),PHAGE_Entero_mEp460_NC_019716(1),PHAGE_Entero_cdt…	5	33.33%	46.20%
B1655	not considered (conserved, incomplete or questionable prophage)	-	5	5.8kb	incomplete(20)	transposase	3261477-3267367	0	10	6	4	1	0	no	5	PHAGE_Salmon_118970_sal4_NC_030919(2),PHAGE_Salmon_SPN9CC_NC_017985(2),PHAGE_Entero_UAB_Phi20_NC_031019(2),PHAGE_Salmon_103203_sal5_NC_031946(2),PHAGE_Shigel_SfIV_NC_022749(1),PHAGE_Salmon_epsilon34_NC_011976(1),PHAGE_Salmon_Maynard_NC_022768(1),PHAGE_Vibrio_TSL_2019_NC_048747(1),PHAGE_Salmon_SenALZ1_NC_049440(1),PHAGE_Vibrio_Aphrodite1_NC_042100(1),PHAGE_Salmon_maane_NC_049508(1),PHAGE_Bordet_vB…	2	0.2	45.82%
B1655	site D	3512924-3554116 [TGCCGATAATAGGAGTCGAACCTACGACCTTCGCATTACGAAT]	6	42.2kb	intact(150)	transposase,tail,head,capsid,coat,portal,terminase,integrase	3511862-3554071	0	50	47	3	1	0	yes	17	PHAGE_Salmon_ST64T_NC_004348(20),PHAGE_Salmon_BTP1_NC_042346(15),PHAGE_Salmon_ST160_NC_014900(15),PHAGE_Entero_UAB_Phi20_NC_031019(13),PHAGE_Salmon_118970_sal4_NC_030919(13),PHAGE_Salmon_SPN9CC_NC_017985(13),PHAGE_Salmon_vB_SemP_Emek_NC_018275(11),PHAGE_Salmon_103203_sal5_NC_031946(9),PHAGE_Salmon_SE1_NC_011802(9),PHAGE_Salmon_g341c_NC_013059(8),PHAGE_Entero_ST104_NC_005841(8),PHAGE_Salmon_SEN22_…	21	0.4	47.46%
B1655	site 2 [SopE]	3974903-4018845 [TATTATAAA]	7	55.4kb	intact(150)	integrase,capsid,tail,portal,head,plate	3965315-4020763	0	61	54	7	1	0	yes	14	PHAGE_Salmon_SEN34_NC_028699(31),PHAGE_Phage_Gifsy_2_NC_010393(19),PHAGE_Phage_Gifsy_1_NC_010392(15),PHAGE_Salmon_SPN3UB_NC_019545(13),PHAGE_Psychr_pOW20_A_NC_020841(7),PHAGE_Entero_mEp237_NC_019704(5),PHAGE_Salmon_Fels_1_NC_010391(5),PHAGE_Haemop_Aaphi23_NC_004827(5),PHAGE_Entero_HK225_NC_019717(4),PHAGE_Entero_YYZ_2008_NC_011356(3),PHAGE_Vibrio_CP_T1_NC_019457(3),PHAGE_Aggreg_S1249_NC_013597(3)…	31	50.81%	50.49%
P7704	site A [fljB_PP2_PP3]	1090640-1161554 [GAGCTGGCGGGAGTTGAACCA/CGCGTCCGAA]	1	70.8kb	intact(150)	integrase,tail,capsid,lysin,terminase,head,plate,lysis	1090640-1161525	0	93	90	3	1	0	yes	12	PHAGE_Salmon_118970_sal3_NC_031940(56),PHAGE_Salmon_RE_2010_NC_019488(43),PHAGE_Salmon_Fels_2_NC_010463(35),PHAGE_Salmon_ST64B_NC_004313(32),PHAGE_Salmon_SEN8_NC_047753(31),PHAGE_Escher_500465_1_NC_049342(16),PHAGE_Klebsi_ST437_OXA245phi4.2_NC_049449(15),PHAGE_Klebsi_4LV2017_NC_047818(14),PHAGE_Shigel_SfII_NC_021857(14),PHAGE_Klebsi_ST512_KPC3phi13.2_NC_049452(13),PHAGE_Klebsi_ST15_OXA48phi14.1_N…	43	0.6021	0.5046
P7704			2	25.5kb	incomplete(50)	tail	1163125-1188634	0	16	12	4	1	0	no	3	PHAGE_Escher_500465_1_NC_049342(12),PHAGE_Acinet_vB_AbaM_ME3_NC_041884(1),PHAGE_Plankt_PaV_LD_NC_016564(1),PHAGE_Bacill_SPbeta_NC_001884(1),PHAGE_Bacill_G_NC_023719(1),PHAGE_Staphy_StauST398_5_NC_023500(1),PHAGE_Klebsi_ST15_OXA48phi14.1_NC_049454(1),PHAGE_Klebsi_ST437_OXA245phi4.1_NC_049448(1)	10	0.75	0.5496
P7704	not considered (conserved, incomplete or questionable prophage)	-	3	11.8kb	incomplete(50)	tail,integrase	2005660-2017532	0	11	6	5	1	0	yes	5	PHAGE_Salmon_SEN1_NC_029003(2),PHAGE_Ralsto_RSF1_NC_028899(1),PHAGE_Ralsto_RSL2_NC_028950(1),PHAGE_Entero_P1_NC_005856(1),PHAGE_Entero_PsP3_NC_005340(1),PHAGE_Escher_RCS47_NC_042128(1),PHAGE_Escher_HK639_NC_016158(1),PHAGE_Pseudo_H101_NC_029094(1),PHAGE_Entero_HK97_NC_002167(1),PHAGE_Salmon_SEN5_NC_028701(1),PHAGE_Pseudo_Bjorn_NC_042103(1),PHAGE_Pseudo_PhiPA3_NC_028999(1),PHAGE_Salmon_SEN4_NC_029…	2	0.1818	0.5159
P7704	not considered (conserved, incomplete or questionable prophage)	-	4	12kb	intact(100)	integrase,tail,terminase	2021279-2033335	0	12	10	2	1	0	yes	4	PHAGE_Salmon_Fels_1_NC_010391(4),PHAGE_Phage_Gifsy_2_NC_010393(3),PHAGE_Phage_Gifsy_1_NC_010392(3),PHAGE_Salmon_SEN5_NC_028701(2),PHAGE_Salmon_SEN4_NC_029015(2),PHAGE_Entero_mEp213_NC_019720(2),PHAGE_Entero_c_1_NC_019706(2),PHAGE_Escher_TL_2011b_NC_019445(1),PHAGE_Klebsi_vB_KpnS_IME279_NC_047862(1),PHAGE_Escher_RCS47_NC_042128(1),PHAGE_Erwini_phiEt88_NC_015295(1),PHAGE_Salmon_SI7_NC_049460(1),PHA…	6	0.3333	0.462
P7704	site D	3497047-3538240 [TGCCGATAATAGGAGTCGAACCTACGACCTTCGCATTACGAAT]	5	42.2kb	intact(150)	transposase,tail,head,capsid,coat,portal,terminase,integrase	3495985-3538195	0	50	48	2	1	0	yes	17	PHAGE_Salmon_ST64T_NC_004348(21),PHAGE_Salmon_BTP1_NC_042346(16),PHAGE_Salmon_ST160_NC_014900(15),PHAGE_Salmon_SPN9CC_NC_017985(13),PHAGE_Salmon_118970_sal4_NC_030919(13),PHAGE_Salmon_vB_SemP_Emek_NC_018275(12),PHAGE_Entero_UAB_Phi20_NC_031019(12),PHAGE_Salmon_103203_sal5_NC_031946(9),PHAGE_Salmon_g341c_NC_013059(9),PHAGE_Entero_ST104_NC_005841(8),PHAGE_Salmon_SE1_NC_011802(8),PHAGE_Salmon_vB_Sos…	21	0.42	0.4746
P7704	site 2 [SopE]	3959041-4002983 [TATTATAAA]	6	55.4kb	intact(150)	integrase,capsid,tail,portal,head,plate	3949452-4004901	0	61	55	6	1	0	yes	14	PHAGE_Salmon_SEN34_NC_028699(31),PHAGE_Phage_Gifsy_2_NC_010393(19),PHAGE_Phage_Gifsy_1_NC_010392(15),PHAGE_Salmon_SPN3UB_NC_019545(13),PHAGE_Psychr_pOW20_A_NC_020841(7),PHAGE_Entero_mEp237_NC_019704(5),PHAGE_Salmon_Fels_1_NC_010391(5),PHAGE_Haemop_Aaphi23_NC_004827(5),PHAGE_Salmon_118970_sal3_NC_031940(4),PHAGE_Entero_HK225_NC_019717(4),PHAGE_Entero_YYZ_2008_NC_011356(3),PHAGE_Pectob_ZF40_NC_0195…	31	0.5081	0.5049
CIP 54.115	not considered (conserved, incomplete or questionable prophage)	-	1	11.8kb	incomplete(50)	tail,integrase	695970-707842	0	11	6	5	1	0	yes	5	PHAGE_Salmon_SEN1_NC_029003(2),PHAGE_Pseudo_Lu11_NC_017972(1),PHAGE_Entero_lambda_NC_001416(1),PHAGE_Ralsto_RSF1_NC_028899(1),PHAGE_Phage_Gifsy_1_NC_010392(1),PHAGE_Salmon_RE_2010_NC_019488(1),PHAGE_Escher_HK639_NC_016158(1),PHAGE_Pectob_ZF40_NC_019522(1),PHAGE_Entero_PsP3_NC_005340(1),PHAGE_Cronob_vB_CsaM_GAP32_NC_019401(1),PHAGE_Salmon_SEN4_NC_029015(1),PHAGE_Salmon_SEN5_NC_028701(1),PHAGE_Ente…	2	18.18%	51.59%
CIP 54.115	not considered (conserved, incomplete or questionable prophage)	-	2	12kb	intact(120)	integrase,lysin,tail,terminase	711589-723645	0	15	12	3	1	0	yes	5	PHAGE_Salmon_Fels_1_NC_010391(5),PHAGE_Phage_Gifsy_2_NC_010393(3),PHAGE_Phage_Gifsy_1_NC_010392(3),PHAGE_Entero_c_1_NC_019706(2),PHAGE_Entero_mEp213_NC_019720(2),PHAGE_Salmon_SPN1S_NC_016761(2),PHAGE_Salmon_SEN4_NC_029015(2),PHAGE_Salmon_SEN5_NC_028701(2),PHAGE_Entero_mEp460_NC_019716(1),PHAGE_Entero_HK97_NC_002167(1),PHAGE_Cronob_ENT39118_NC_019934(1),PHAGE_Sinorh_phiM7_NC_041929(1),PHAGE_Entero…	7	33.33%	46.20%
CIP 54.115	site D	2188981-2230174 [TGCCGATAATAGGAGTCGAACCTACGACCTTCGCATTACGAAT]	3	42.2kb	intact(150)	transposase,tail,head,capsid,coat,portal,terminase,integrase	2187919-2230129	0	54	49	5	1	0	yes	18	PHAGE_Salmon_ST64T_NC_004348(20),PHAGE_Salmon_BTP1_NC_042346(17),PHAGE_Salmon_SPN9CC_NC_017985(14),PHAGE_Salmon_ST160_NC_014900(14),PHAGE_Salmon_118970_sal4_NC_030919(13),PHAGE_Salmon_vB_SemP_Emek_NC_018275(13),PHAGE_Entero_UAB_Phi20_NC_031019(12),PHAGE_Salmon_103203_sal5_NC_031946(9),PHAGE_Salmon_g341c_NC_013059(9),PHAGE_Salmon_SE1_NC_011802(8),PHAGE_Entero_ST104_NC_005841(8),PHAGE_Salmon_SEN22_…	20	37.03%	47.46%
CIP 54.115	site 2 [SopE]	2650963-2694903 [TATTATAAA]	4	55.4kb	intact(140)	integrase,capsid,tail,portal,head,plate	2641374-2696822	0	61	55	6	1	0	yes	15	PHAGE_Salmon_SEN34_NC_028699(30),PHAGE_Phage_Gifsy_2_NC_010393(19),PHAGE_Phage_Gifsy_1_NC_010392(15),PHAGE_Salmon_SPN3UB_NC_019545(13),PHAGE_Psychr_pOW20_A_NC_020841(7),PHAGE_Salmon_Fels_1_NC_010391(5),PHAGE_Haemop_Aaphi23_NC_004827(5),PHAGE_Entero_mEp237_NC_019704(5),PHAGE_Entero_HK225_NC_019717(4),PHAGE_Salmon_118970_sal3_NC_031940(4),PHAGE_Pectob_ZF40_NC_019522(4),PHAGE_Aggreg_S1249_NC_013597(…	30	49.18%	50.48%
CIP 54.115	site A	4540532-4543285 (no prophage)	5	25.5kb	incomplete(50)	tail	4544891-4570400	0	16	12	4	1	0	no	3	PHAGE_Escher_500465_1_NC_049342(12),PHAGE_Bacill_SPbeta_NC_001884(1),PHAGE_Klebsi_ST15_OXA48phi14.1_NC_049454(1),PHAGE_Acinet_vB_AbaM_ME3_NC_041884(1),PHAGE_Bacill_G_NC_023719(1),PHAGE_Klebsi_ST437_OXA245phi4.1_NC_049448(1),PHAGE_Plankt_PaV_LD_NC_016564(1),PHAGE_Staphy_StauST398_5_NC_023500(1)	10	0.75	54.96%
-, not manually determined (see Phaster data in column H)
*, All genomes begin at the dnaA locus (positions 1..1401), with the exception of CIP 54.115 and P7704 for which the coordinates of the dnaA locus are 3420769..3422169 and 4728777..4730177, respectively.
