# Supplementary material for: Genomic perspective on the bacillus causing paratyphoid B fever
Source: Research Square preprint supplement (doi:10.21203/rs.3.rs-4502330/v1), 2024-06-18
Supplement: Supplementary file 5 [file 7f88d741890db26aa261d64e.xlsx]

## Sheet: Data 5
Genotype	Allele		Position*	Locus tag*	Gene product	Codon	Codon position	Change	Gene NS/S ratio
	Ancestral	Derived
1	C	T	3634767	CIP54_03607	Long polar fimbria protein A	39	3	S	0
2.0	G	A	1951772	CIP54_01961	Probable fimbrial chaperone SfmC	174	3	S	0
2.1	G	A	4658056	CIP54_04618	Iron-sulfur cluster assembly iron binding protein IscA	41	3	S	0
2.1.1	C	T	684024	CIP54_00668	Holliday junction ATP-dependent DNA helicase RuvB (EC 3.6.4.12)	181	1	S	0
3	A	G	90539	CIP54_00070	Inner membrane protein YfeZ	26	3	S	0
4	T	A	3433743	CIP54_03405	2-dehydro-3-deoxyphosphogalactonate aldolase (EC 4.1.2.21)	116	3	S	0
11	T	C	1906676	CIP54_01913	2,3-dihydroxybenzoate-AMP ligase (EC 2.7.7.58) [enterobactin] siderophore	524	3	S	0
5	G	A	1093308	CIP54_01093	Arginine/ornithine antiporter ArcD	322	3	S	0.3
6	G	A	38915	CIP54_00022	Exported zinc metalloprotease YfgC precursor	197	3	S	0.3
7.0	C	T	4263615	CIP54_04237	VapB protein (antitoxin to VapC)	53	3	S	0
7.1	C	T	683549	CIP54_00668	Holliday junction ATP-dependent DNA helicase RuvB (EC 3.6.4.12)	22	3	S	0
7.1.1_Chile1	C	T	2730821	CIP54_02752	LysR-family transcriptional regulator YjiE	106	3	S	0.3
7.2_EuropeEasternAsia	C	T	425008	CIP54_00402	Uncharacterized protein STM2133	100	3	S	0
7.3	T	C	2523631	CIP54_02524	Carnitine operon protein CaiE	72	3	S	2
7.3.1_NorthAfrica1	G	A	4062592	CIP54_04028	Uncharacterized oxidoreductase YgjR	23	3	S	0.7
7.3.2_BAOR	G	A	2863873	CIP54_02892	L-ascorbate-6-phosphate lactonase UlaG	163	3	S	0.25
8	C	T	265733	CIP54_00245	YfaE: ferredoxin involved with ribonucleotide reductase diferric-tyrosyl radical cofactor maintenance	58	3	S	0
9.0	G	A	1173418	CIP54_01183	Tetrathionate reductase two-component response regulator	113	1	S	1.5
9.1_France	C	T	2377096	CIP54_02386	ATP-dependent helicase HrpB	107	3	S	0.4
10.0	G	A	1824734	CIP54_01826	Asparagine synthetase [glutamine-hydrolyzing] (EC 6.3.5.4)	117	1	NS	0.75
10.1	G	A	1137604	CIP54_01141	hypothetical protein	5	1	S	0
10.1.1_Europe1	G	A	1484720	CIP54_01514	DNA transformation protein TfoX	68	3	S	0
10.2	C	T	2728136	CIP54_02748	Uncharacterized protein YjiH	23	1	S	0
10.3	G	A	3526440	CIP54_03499	ATP-dependent DNA helicase RecG (EC 3.6.4.12)	570	1	NS	3
10.3.1_SouthAsia1	G	A	1000664	CIP54_01005	L-amino acid N-acyltransferase MnaT	15	3	S	0
10.3.2_MiddleEast1	C	T	471647	CIP54_00439	UTP--glucose-1-phosphate uridylyltransferase (EC 2.7.7.9)	232	3	S	0
10.3.3_Turkey2	G	A	754875	CIP54_00754	UPF0053 inner membrane protein YoaE	275	3	S	0.5
10.3.4_Chile2	C	T	4610147	CIP54_04573	Sigma factor RpoE regulatory protein RseC	140	3	S	0
10.3.5_MiddleEast2	C	T	1596080	CIP54_01604	Uncharacterized lipoprotein YbjP	71	1	S	0
10.3.6_SouthAmerica	G	A	4061917	CIP54_04028	Uncharacterized oxidoreductase YgjR	248	3	S	0.7
10.3.7_NorthAfrica2	G	A	1647368	CIP54_01657	Sugar phosphatase YbiV	175	3	S	1
10.3.8	G	A	1629504	CIP54_01639	Acyl-CoA dehydrogenase STM0857	54	3	S	0.5
10.3.8.1_SouthAsia2	G	A	2017342	CIP54_02026	Adenine phosphoribosyltransferase (EC 2.4.2.7)	119	3	S	1
10.3.8.2_Turkey3	T	C	1598832	CIP54_01608	Arginine ABC transporter, permease protein ArtM	6	3	S	1
10.3.8.3_MiddleEast3	C	T	307604	CIP54_00283	E3 ubiquitin-protein ligase SspH2	23	3	S	0.2
10.3.8.4_MiddleEast4	C	T	1617243	CIP54_01627	Inner membrane protein YbjJ	221	3	S	1.5
10.3.8.5_EuropeNorthAfrica	G	T	3431419	CIP54_03402	Sugar phosphatase YidA (EC 3.1.3.23)	226	3	S	2
10.3.9_NorthAfrica3	C	T	829143	CIP54_00833	putative secreted protein	36	3	S	0
*based on CIP 54.115 reference genome
S, synonymous, NS, non-synonymous
