# Supplementary material for: Genomic perspective on the bacillus causing paratyphoid B fever
Source: Research Square preprint supplement (doi:10.21203/rs.3.rs-4502330/v1), 2024-06-18
Supplement: Supplementary file 6 [file abf63a987d925f2850e7e8cc.xlsx]

## Sheet: Data 6
Name	Date Entered	Collection Year	Country of isolation	Genotype	HC0 cgMLST	HC2	HC5	HC10	HC20	HC50	HC100	HC200	HC400	HC900	HC2000	HC2600	HC2850	Also in Diversity dataset	Data Source(Accession No.	Lab Contact
202213956	2023-01-03	2022	France	4	343757	343757	343757	343757	343757	343757	343757	12575	1620	155	155	2	2		ERR12736629	F.X.Weill, Institut Pasteur
748852	2019-06-11	2019	United Kingdom	5	184772	184772	184772	184772	184772	184772	184772	184772	1620	155	155	2	2	Yes	SRR9261109	Public Health England
202109956	2023-04-11	2021	France	10.1.1_Europe1	355139	355139	256895	256882	256882	5867	1620	1620	1620	155	155	2	2		ERR12736621	F.X.Weill, Institut Pasteur
202200633	2023-01-16	2022	France	10.1.1_Europe1	345307	345307	345307	256882	256882	5867	1620	1620	1620	155	155	2	2		ERR12736623	F.X.Weill, Institut Pasteur
201606869	2021-03-10	2016	France	10.3.6_SouthAmerica	256890	19820	1857	1857	1857	1857	1620	1620	1620	155	155	2	2		ERR12736559	F.X.Weill, Institut Pasteur
201611065	2021-03-10	2016	France	10.3.6_SouthAmerica	256874	68095	68095	68095	68095	1857	1620	1620	1620	155	155	2	2		ERR12736565	F.X.Weill, Institut Pasteur
201611212	2021-03-10	2016	France	10.1.1_Europe1	256882	256882	256882	256882	256882	5867	1620	1620	1620	155	155	2	2	yes	ERR12736566	F.X.Weill, Institut Pasteur
201810947	2021-04-12	2018	France	10.1.1_Europe1	260151	260151	256895	256882	256882	5867	1620	1620	1620	155	155	2	2	yes	ERR12736596	F.X.Weill, Institut Pasteur
201900502	2021-04-12	2019	France	10.1.1_Europe1	260150	256895	256895	256882	256882	5867	1620	1620	1620	155	155	2	2	yes	ERR12736597	F.X.Weill, Institut Pasteur
202000526	2021-03-10	2020	France	10.1.1_Europe1	256895	256895	256895	256882	256882	5867	1620	1620	1620	155	155	2	2	yes	ERR12736611	F.X.Weill, Institut Pasteur
201701274	2021-03-10	2017	France	10.3.6_SouthAmerica	68095	68095	68095	68095	68095	1857	1620	1620	1620	155	155	2	2		ERR12736543	F.X.Weill, Institut Pasteur
201800037	2021-03-10	2018	France	10.3.6_SouthAmerica	256873	68095	68095	68095	68095	1857	1620	1620	1620	155	155	2	2		ERR12736544	F.X.Weill, Institut Pasteur
201703220	2021-03-10	2017	France	10.2	256883	256883	256883	256883	256883	1857	1620	1620	1620	155	155	2	2	yes	ERR12736567	F.X.Weill, Institut Pasteur
202002437	2022-12-29	2020	France	10.2	342088	342088	342088	342088	342088	1857	1620	1620	1620	155	155	2	2	yes	ERR12736614	F.X.Weill, Institut Pasteur
201708437	2021-03-10	2017	France	10.3	256887	256887	256887	256887	256887	1857	1620	1620	1620	155	155	2	2	yes	ERR12736578	F.X.Weill, Institut Pasteur
201704392	2022-12-29	2017	France	10.3	341932	341932	341932	341932	341932	1857	1620	1620	1620	155	155	2	2	yes	ERR12736570	F.X.Weill, Institut Pasteur
201707833	2022-12-29	2017	France	10.3	341926	341926	256887	256887	256887	1857	1620	1620	1620	155	155	2	2	yes	ERR12736576	F.X.Weill, Institut Pasteur
201543	2017-08-29	2015	United Kingdom	10.3.1_SouthAsia1	83939	83939	83939	83939	83939	37773	1620	1620	1620	155	155	2	2	Yes	SRR5985729	Public Health England
201808376	2021-03-10	2018	France	10.3.6_SouthAmerica	60784	60784	60784	60784	32225	1857	1620	1620	1620	155	155	2	2		ERR12736593	F.X.Weill, Institut Pasteur
202109527	2023-04-11	2021	France	10.3.6_SouthAmerica	355133	85651	60784	60784	32225	1857	1620	1620	1620	155	155	2	2		ERR12736620	F.X.Weill, Institut Pasteur
248546	2017-08-29	2016	United Kingdom	10.3.1_SouthAsia1	83952	83952	83939	83939	83939	37773	1620	1620	1620	155	155	2	2	Yes	SRR5985728	Public Health England
202110643	2023-04-12	2021	France	10.3.6_SouthAmerica	355490	355490	355490	68095	68095	1857	1620	1620	1620	155	155	2	2		ERR12736622	F.X.Weill, Institut Pasteur
475848	2018-09-28	2018	United Kingdom	10.3.1_SouthAsia1	145414	145414	145414	145414	145414	37773	1620	1620	1620	155	155	2	2	Yes	SRR7910361	Public Health England
202201461	2023-01-16	2022	France	10.3.6_SouthAmerica	345306	345306	68095	68095	68095	1857	1620	1620	1620	155	155	2	2		ERR12736624	F.X.Weill, Institut Pasteur
202201462	2023-01-16	2022	France	10.3.6_SouthAmerica	345306	345306	68095	68095	68095	1857	1620	1620	1620	155	155	2	2		ERR12736625	F.X.Weill, Institut Pasteur
157269	2016-04-02	2015	United Kingdom	10.3.2_MiddleEast1	1620	1620	1620	1620	1620	1620	1620	1620	1620	155	155	2	2	Yes	SRR3322359	Public Health England
202213250	2022-12-19	2022	France	10.3.6_SouthAmerica	339875	339875	1857	1857	1857	1857	1620	1620	1620	155	155	2	2		ERR12736626	F.X.Weill, Institut Pasteur
202213562	2022-12-26	2022	France	10.3.6_SouthAmerica	83937	19820	1857	1857	1857	1857	1620	1620	1620	155	155	2	2		ERR12736627	F.X.Weill, Institut Pasteur
164895	2017-08-29	2015	United Kingdom	10.3.2_MiddleEast1	83949	83935	83935	83935	83935	1620	1620	1620	1620	155	155	2	2	Yes	SRR5985747	Public Health England
166379	2017-08-30	2015	United Kingdom	10.3.2_MiddleEast1	83949	83935	83935	83935	83935	1620	1620	1620	1620	155	155	2	2	Yes	SRR5989243	Public Health England
202213663	2022-12-26	2022	France	10.3.6_SouthAmerica	340897	340897	32232	1857	1857	1857	1620	1620	1620	155	155	2	2		ERR12736628	F.X.Weill, Institut Pasteur
202214298	2023-01-13	2022	France	10.3.6_SouthAmerica	345069	345069	345069	1857	1857	1857	1620	1620	1620	155	155	2	2		ERR12736630	F.X.Weill, Institut Pasteur
202301454	2023-03-20	2023	France	10.3.6_SouthAmerica	351266	19820	1857	1857	1857	1857	1620	1620	1620	155	155	2	2		ERR12736632	F.X.Weill, Institut Pasteur
182074	2017-08-29	2015	United Kingdom	10.3.2_MiddleEast1	83949	83935	83935	83935	83935	1620	1620	1620	1620	155	155	2	2	Yes	SRR5985746	Public Health England
201705824	2021-03-10	2017	France	10.3.7_NorthAfrica2	256885	256885	256885	256885	256885	37812	1620	1620	1620	155	155	2	2		ERR12736572	F.X.Weill, Institut Pasteur
201911621	2021-03-10	2019	France	10.3.7_NorthAfrica2	256892	256892	256892	256892	256892	256892	1620	1620	1620	155	155	2	2		ERR12736609	F.X.Weill, Institut Pasteur
201608407	2021-03-10	2016	France	10.3.8.2_Turkey3	256889	256889	256889	17705	17705	1857	1620	1620	1620	155	155	2	2		ERR12736561	F.X.Weill, Institut Pasteur
201708324	2021-03-10	2017	France	10.3.8.2_Turkey3	256888	256888	17705	17705	17705	1857	1620	1620	1620	155	155	2	2		ERR12736577	F.X.Weill, Institut Pasteur
202301321	2023-03-16	2023	France	10.3.8.5_EuropeNorthAfrica	350847	350847	350847	350847	350847	1857	1620	1620	1620	155	155	2	2		ERR12736631	F.X.Weill, Institut Pasteur
202302548	2023-03-20	2023	France	7.3	357349	357349	357349	357349	357349	37832	4708	1620	1620	155	155	2	2		ERR12736633	F.X.Weill, Institut Pasteur
201707217	2021-03-10	2017	France	7.3.1_NorthAfrica1	256881	256881	256881	256881	4708	4708	4708	1620	1620	155	155	2	2		ERR12736574	F.X.Weill, Institut Pasteur
202102737	2021-10-25	2021	France	7.3.2_BAOR	289425	289425	289425	289425	289425	168757	4708	1620	1620	155	155	2	2		ERR12736617	F.X.Weill, Institut Pasteur
1693190	2022-09-10	2022	United Kingdom	10	322751	322751	322751	322751	322751	234064	123844	1620	1620	155	155	2	2		SRR21408199	Public Health England
1705718	2022-09-19	2022	United Kingdom	10	324704	322751	322751	322751	322751	234064	123844	1620	1620	155	155	2	2		SRR21619165	Public Health England
436944	2018-06-21	2017	United Kingdom	10.3.2_MiddleEast1	83949	83935	83935	83935	83935	1620	1620	1620	1620	155	155	2	2	Yes	SRR7401836	Public Health England
PNCS012865	2021-05-18	2017	Canada	10.1	271761	271761	271761	271761	271761	5867	1620	1620	1620	155	155	2	2		SRR14570947	National Microbiology Laboratory
652965	2018-12-17	2018	United Kingdom	10.3.2_MiddleEast1	159457	145069	1620	1620	1620	1620	1620	1620	1620	155	155	2	2	Yes	SRR8325469	Public Health England
PNCS012866	2021-05-18	2017	Canada	10.1	271761	271761	271761	271761	271761	5867	1620	1620	1620	155	155	2	2		SRR14570951	National Microbiology Laboratory
204430	2017-09-01	2016	United Kingdom	10.3.1_SouthAsia1	83939	83939	83939	83939	83939	37773	1620	1620	1620	155	155	2	2		SRR5989985	Public Health England
204431	2017-08-29	2016	United Kingdom	10.3.1_SouthAsia1	83939	83939	83939	83939	83939	37773	1620	1620	1620	155	155	2	2		SRR5985739	Public Health England
808192	2019-10-04	2019	United Kingdom	10.3.2_MiddleEast1	204051	83935	83935	83935	83935	1620	1620	1620	1620	155	155	2	2	Yes	SRR10229745	Public Health England
376281	2017-08-29	2017	United Kingdom	10.3.1_SouthAsia1	86258	83939	83939	83939	83939	37773	1620	1620	1620	155	155	2	2		SRR5983000	Public Health England
1616384	2022-04-25	2022	United Kingdom	10.3.1_SouthAsia1	303823	303823	303823	145414	145414	37773	1620	1620	1620	155	155	2	2		SRR18894061	Public Health England
813384	2019-10-04	2019	United Kingdom	10.3.2_MiddleEast1	203950	145069	1620	1620	1620	1620	1620	1620	1620	155	155	2	2	Yes	SRR10228817	Public Health England
49694	2015-08-27	2014	United Kingdom	10.3.2_MiddleEast1	25304	25304	25304	1620	1620	1620	1620	1620	1620	155	155	2	2		SRR1958677	Public Health England - Gastrointestinal Bacteria Reference Unit
158924	2017-08-29	2015	United Kingdom	10.3.2_MiddleEast1	83949	83935	83935	83935	83935	1620	1620	1620	1620	155	155	2	2		SRR5985753	Public Health England
158949	2017-08-30	2015	United Kingdom	10.3.2_MiddleEast1	83948	83935	83935	83935	83935	1620	1620	1620	1620	155	155	2	2		SRR5989316	Public Health England
890420	2020-02-23	2019	United Kingdom	10.3.2_MiddleEast1	203950	145069	1620	1620	1620	1620	1620	1620	1620	155	155	2	2	Yes	SRR11142698	Public Health England
168316	2017-08-29	2015	United Kingdom	10.3.2_MiddleEast1	83948	83935	83935	83935	83935	1620	1620	1620	1620	155	155	2	2		SRR5985754	Public Health England
169616	2017-08-29	2015	United Kingdom	10.3.2_MiddleEast1	83935	83935	83935	83935	83935	1620	1620	1620	1620	155	155	2	2		SRR5985730	Public Health England
173749	2017-08-29	2015	United Kingdom	10.3.2_MiddleEast1	83948	83935	83935	83935	83935	1620	1620	1620	1620	155	155	2	2		SRR5985734	Public Health England
182837	2017-08-29	2015	United Kingdom	10.3.2_MiddleEast1	83948	83935	83935	83935	83935	1620	1620	1620	1620	155	155	2	2		SRR5985737	Public Health England
185865	2017-08-29	2015	United Kingdom	10.3.2_MiddleEast1	83949	83935	83935	83935	83935	1620	1620	1620	1620	155	155	2	2		SRR5985745	Public Health England
185916	2017-08-29	2015	United Kingdom	10.3.2_MiddleEast1	83949	83935	83935	83935	83935	1620	1620	1620	1620	155	155	2	2		SRR5985731	Public Health England
186530	2017-08-29	2015	United Kingdom	10.3.2_MiddleEast1	83949	83935	83935	83935	83935	1620	1620	1620	1620	155	155	2	2		SRR5985752	Public Health England
187551	2017-08-29	2015	United Kingdom	10.3.2_MiddleEast1	83948	83935	83935	83935	83935	1620	1620	1620	1620	155	155	2	2		SRR5985749	Public Health England
197021	2017-09-01	2015	United Kingdom	10.3.2_MiddleEast1	83949	83935	83935	83935	83935	1620	1620	1620	1620	155	155	2	2		SRR5989987	Public Health England
197022	2017-08-30	2015	United Kingdom	10.3.2_MiddleEast1	84197	83935	83935	83935	83935	1620	1620	1620	1620	155	155	2	2		SRR5989250	Public Health England
203640	2017-09-01	2016	United Kingdom	10.3.2_MiddleEast1	83949	83935	83935	83935	83935	1620	1620	1620	1620	155	155	2	2		SRR5989989	Public Health England
404925	2018-06-05	2017	United Kingdom	10.3.2_MiddleEast1	83949	83935	83935	83935	83935	1620	1620	1620	1620	155	155	2	2		SRR7257487	Public Health England
408404	2019-02-09	2017	United Kingdom	10.3.2_MiddleEast1	83949	83935	83935	83935	83935	1620	1620	1620	1620	155	155	2	2		SRR8548887	Public Health England
607867	2018-09-26	2018	United Kingdom	10.3.2_MiddleEast1	145069	145069	1620	1620	1620	1620	1620	1620	1620	155	155	2	2		SRR7903091	Public Health England
654691	2018-12-24	2018	United Kingdom	10.3.2_MiddleEast1	160095	145069	1620	1620	1620	1620	1620	1620	1620	155	155	2	2		SRR8367071	Public Health England
668723	2019-01-22	2019	United Kingdom	10.3.2_MiddleEast1	160095	145069	1620	1620	1620	1620	1620	1620	1620	155	155	2	2		SRR8452291	Public Health England
801488	2019-09-13	2019	United Kingdom	10.3.2_MiddleEast1	145069	145069	1620	1620	1620	1620	1620	1620	1620	155	155	2	2		SRR10108459	Public Health England
811020	2019-10-06	2019	United Kingdom	10.3.2_MiddleEast1	204051	83935	83935	83935	83935	1620	1620	1620	1620	155	155	2	2		SRR10232049	Public Health England
812192	2019-10-18	2019	United Kingdom	10.3.2_MiddleEast1	203950	145069	1620	1620	1620	1620	1620	1620	1620	155	155	2	2		SRR10247486	Public Health England
814335	2019-10-04	2019	United Kingdom	10.3.2_MiddleEast1	203987	145069	1620	1620	1620	1620	1620	1620	1620	155	155	2	2		SRR10228873	Public Health England
815518	2019-10-08	2019	United Kingdom	10.3.2_MiddleEast1	204454	145069	1620	1620	1620	1620	1620	1620	1620	155	155	2	2		SRR10236698	Public Health England
825143	2019-10-21	2019	United Kingdom	10.3.2_MiddleEast1	145069	145069	1620	1620	1620	1620	1620	1620	1620	155	155	2	2		SRR10314919	Public Health England
890463	2020-02-25	2019	United Kingdom	10.3.2_MiddleEast1	204454	145069	1620	1620	1620	1620	1620	1620	1620	155	155	2	2		SRR11147305	Public Health England
1383358	2021-09-13	2021	United Kingdom	10.3.2_MiddleEast1	283631	145069	1620	1620	1620	1620	1620	1620	1620	155	155	2	2		SRR15853374	Public Health England
1432877	2021-09-17	2021	United Kingdom	10.3.2_MiddleEast1	284057	145069	1620	1620	1620	1620	1620	1620	1620	155	155	2	2		SRR15924195	Public Health England
1438005	2021-09-17	2021	United Kingdom	10.3.2_MiddleEast1	284052	145069	1620	1620	1620	1620	1620	1620	1620	155	155	2	2		SRR15924201	Public Health England
1439515	2021-09-23	2021	United Kingdom	10.3.2_MiddleEast1	284057	145069	1620	1620	1620	1620	1620	1620	1620	155	155	2	2		SRR16012276	Public Health England
1449358	2021-09-24	2021	United Kingdom	10.3.2_MiddleEast1	284807	145069	1620	1620	1620	1620	1620	1620	1620	155	155	2	2		SRR16028288	Public Health England
201708800	2022-12-29	2017	France	10.3.2_MiddleEast1	341936	145069	1620	1620	1620	1620	1620	1620	1620	155	155	2	2	yes	ERR12736580	F.X.Weill, Institut Pasteur
617004	2018-10-11	2018	United Kingdom	10.3.3_Turkey2	146565	146565	146565	146565	146565	37833	1620	1620	1620	155	155	2	2	Yes	SRR7997130	Public Health England
201606982	2022-12-29	2016	France	10.3.3_Turkey2	341880	341880	341880	341880	146565	37833	1620	1620	1620	155	155	2	2	yes	ERR12736539	F.X.Weill, Institut Pasteur
147871	2017-08-30	2015	United Kingdom	10.3.5_MiddleEast2	84211	84211	84211	84211	84211	1857	1620	1620	1620	155	155	2	2	Yes	SRR5989311	Public Health England
201708500	2022-12-29	2017	France	10.3.5_MiddleEast2	84211	84211	84211	84211	84211	1857	1620	1620	1620	155	155	2	2	yes	ERR12736579	F.X.Weill, Institut Pasteur
13839	2015-08-27	2014	United Kingdom	10.3.6_SouthAmerica	27029	7157	7157	7157	7092	1857	1620	1620	1620	155	155	2	2	Yes	SRR1966097	Gastrointestinal Bacteria Reference Unit, Public Health England
1449940	2021-12-01	2021	United Kingdom	10.3.2_MiddleEast1	284057	145069	1620	1620	1620	1620	1620	1620	1620	155	155	2	2		SRR16134594	Public Health England
31936	2015-08-27	2014	United Kingdom	10.3.6_SouthAmerica	26385	26385	26385	26385	26385	26385	1620	1620	1620	155	155	2	2	Yes	SRR1965307	Gastrointestinal Bacteria Reference Unit, Public Health England
1469983	2021-09-28	2021	United Kingdom	10.3.2_MiddleEast1	285129	281594	1620	1620	1620	1620	1620	1620	1620	155	155	2	2		SRR16077458	Public Health England
1472906	2021-12-01	2021	United Kingdom	10.3.2_MiddleEast1	287295	145069	1620	1620	1620	1620	1620	1620	1620	155	155	2	2		SRR16134690	Public Health England
68678	2015-08-27	2014	United Kingdom	10.3.6_SouthAmerica	26545	26545	26545	26545	26545	1857	1620	1620	1620	155	155	2	2	Yes	SRR1965500	Gastrointestinal Bacteria Reference Unit, Public Health England
1478380	2021-12-01	2021	United Kingdom	10.3.2_MiddleEast1	284057	145069	1620	1620	1620	1620	1620	1620	1620	155	155	2	2		SRR16134638	Public Health England
83282	2015-08-27	2014	United Kingdom	10.3.6_SouthAmerica	28320	28320	1857	1857	1857	1857	1620	1620	1620	155	155	2	2	Yes	SRR1968891	Public Health England - Gastrointestinal Bacteria Reference Unit
83283	2015-08-27	2014	United Kingdom	10.3.6_SouthAmerica	28320	28320	1857	1857	1857	1857	1620	1620	1620	155	155	2	2	Yes	SRR1967611	Public Health England - Gastrointestinal Bacteria Reference Unit
127431	2017-08-29	2015	United Kingdom	10.3.6_SouthAmerica	84013	84013	84013	84013	32225	1857	1620	1620	1620	155	155	2	2	Yes	SRR5985750	Public Health England
129499	2017-08-29	2015	United Kingdom	10.3.6_SouthAmerica	1857	1857	1857	1857	1857	1857	1620	1620	1620	155	155	2	2	Yes	SRR5985744	Public Health England
1486297	2021-10-04	2021	United Kingdom	10.3.2_MiddleEast1	287295	145069	1620	1620	1620	1620	1620	1620	1620	155	155	2	2		SRR16168875	Public Health England
1487460	2021-10-13	2021	United Kingdom	10.3.2_MiddleEast1	288787	145069	1620	1620	1620	1620	1620	1620	1620	155	155	2	2		SRR16301627	Public Health England
1487484	2021-10-13	2021	United Kingdom	10.3.2_MiddleEast1	285129	281594	1620	1620	1620	1620	1620	1620	1620	155	155	2	2		SRR16301617	Public Health England
1487519	2021-10-13	2021	United Kingdom	10.3.2_MiddleEast1	287295	145069	1620	1620	1620	1620	1620	1620	1620	155	155	2	2		SRR16301621	Public Health England
1488358	2021-10-04	2021	United Kingdom	10.3.2_MiddleEast1	284057	145069	1620	1620	1620	1620	1620	1620	1620	155	155	2	2		SRR16173719	Public Health England
163226	2017-08-29	2015	United Kingdom	10.3.6_SouthAmerica	83938	26545	26545	26545	26545	1857	1620	1620	1620	155	155	2	2	Yes	SRR5985724	Public Health England
1488431	2021-10-04	2021	United Kingdom	10.3.2_MiddleEast1	287295	145069	1620	1620	1620	1620	1620	1620	1620	155	155	2	2		SRR16173692	Public Health England
1489280	2021-10-05	2021	United Kingdom	10.3.2_MiddleEast1	285129	281594	1620	1620	1620	1620	1620	1620	1620	155	155	2	2		SRR16199731	Public Health England
1493012	2021-10-13	2021	United Kingdom	10.3.2_MiddleEast1	284057	145069	1620	1620	1620	1620	1620	1620	1620	155	155	2	2		SRR16278007	Public Health England
1497134	2021-10-13	2021	United Kingdom	10.3.2_MiddleEast1	284057	145069	1620	1620	1620	1620	1620	1620	1620	155	155	2	2		SRR16291940	Public Health England
1497942	2021-10-20	2021	United Kingdom	10.3.2_MiddleEast1	284057	145069	1620	1620	1620	1620	1620	1620	1620	155	155	2	2		SRR16466791	Public Health England
243874	2017-08-29	2016	United Kingdom	10.3.6_SouthAmerica	83937	19820	1857	1857	1857	1857	1620	1620	1620	155	155	2	2	Yes	SRR5985720	Public Health England
1498945	2021-10-26	2021	United Kingdom	10.3.2_MiddleEast1	284052	145069	1620	1620	1620	1620	1620	1620	1620	155	155	2	2		SRR16568937	Public Health England
1498990	2021-10-26	2021	United Kingdom	10.3.2_MiddleEast1	289825	281594	1620	1620	1620	1620	1620	1620	1620	155	155	2	2		SRR16568878	Public Health England
1749713	2022-11-13	2022	United Kingdom	10.3.2_MiddleEast1	334359	334359	1620	1620	1620	1620	1620	1620	1620	155	155	2	2		SRR22264025	Gastrointestinal Bacteria Reference Unit, Public Health England
1752593	2022-11-15	2022	United Kingdom	10.3.2_MiddleEast1	334359	334359	1620	1620	1620	1620	1620	1620	1620	155	155	2	2		SRR22284553	Gastrointestinal Bacteria Reference Unit, Public Health England
1700543	2022-09-12	2022	United Kingdom	10.3.2_MiddleEast1	323383	281594	1620	1620	1620	1620	1620	1620	1620	155	155	2	2		SRR21520571	Public Health England
383937	2018-05-25	2017	United Kingdom	10.3.6_SouthAmerica	122744	122744	54510	54510	32225	1857	1620	1620	1620	155	155	2	2	Yes	SRR7215993	Public Health England
1703291	2022-09-16	2022	United Kingdom	10.3.2_MiddleEast1	285129	281594	1620	1620	1620	1620	1620	1620	1620	155	155	2	2		SRR21594852	Public Health England
1708119	2022-09-23	2022	United Kingdom	10.3.2_MiddleEast1	325524	281594	1620	1620	1620	1620	1620	1620	1620	155	155	2	2		SRR21678232	Public Health England
410878	2018-07-19	2017	United Kingdom	10.3.6_SouthAmerica	32232	32232	32232	1857	1857	1857	1620	1620	1620	155	155	2	2	Yes	SRR7538783	Public Health England
PNUSAS223827	2021-09-01	2021	United States	10.3.2_MiddleEast1	281594	281594	1620	1620	1620	1620	1620	1620	1620	155	155	2	2		SRR15655698	PulseNet Next Generation Subtyping Methods Unit
27009	2015-08-27	2014	United Kingdom	10.3.6_SouthAmerica	28558	28558	7157	7157	7092	1857	1620	1620	1620	155	155	2	2		SRR1967857	Gastrointestinal Bacteria Reference Unit, Public Health England
440068	2018-07-09	2017	United Kingdom	10.3.6_SouthAmerica	126949	126949	26385	26385	26385	26385	1620	1620	1620	155	155	2	2	Yes	SRR7495453	Public Health England
44704	2015-08-27	2014	United Kingdom	10.3.6_SouthAmerica	7092	7092	7092	7092	7092	1857	1620	1620	1620	155	155	2	2		SRR1957735	Gastrointestinal Bacteria Reference Unit, Public Health England
46597	2015-08-27	2014	United Kingdom	10.3.6_SouthAmerica	7092	7092	7092	7092	7092	1857	1620	1620	1620	155	155	2	2		SRR1966390	Gastrointestinal Bacteria Reference Unit, Public Health England
454881	2018-05-14	2017	United Kingdom	10.3.6_SouthAmerica	120708	120708	120708	68095	68095	1857	1620	1620	1620	155	155	2	2	Yes	SRR7159859	Public Health England
454903	2018-05-04	2017	United Kingdom	10.3.6_SouthAmerica	119607	119607	119607	119607	119607	1857	1620	1620	1620	155	155	2	2	Yes	SRR7108945	Public Health England
68943	2015-08-27	2014	United Kingdom	10.3.6_SouthAmerica	28320	28320	1857	1857	1857	1857	1620	1620	1620	155	155	2	2		SRR1967580	Gastrointestinal Bacteria Reference Unit, Public Health England
134032	2016-04-02	2015	United Kingdom	10.3.6_SouthAmerica	1857	1857	1857	1857	1857	1857	1620	1620	1620	155	155	2	2		SRR3323026	Public Health England
138334	2017-08-29	2015	United Kingdom	10.3.6_SouthAmerica	83950	32232	32232	1857	1857	1857	1620	1620	1620	155	155	2	2		SRR5985751	Public Health England
142184	2017-08-29	2015	United Kingdom	10.3.6_SouthAmerica	83950	32232	32232	1857	1857	1857	1620	1620	1620	155	155	2	2		SRR5985741	Public Health England
142185	2017-08-29	2015	United Kingdom	10.3.6_SouthAmerica	83950	32232	32232	1857	1857	1857	1620	1620	1620	155	155	2	2		SRR5985738	Public Health England
149240	2017-08-29	2015	United Kingdom	10.3.6_SouthAmerica	83936	26385	26385	26385	26385	26385	1620	1620	1620	155	155	2	2		SRR5985727	Public Health England
174758	2017-08-30	2015	United Kingdom	10.3.6_SouthAmerica	84210	84210	84210	84210	32225	1857	1620	1620	1620	155	155	2	2		SRR5989314	Public Health England
183620	2017-08-29	2015	United Kingdom	10.3.6_SouthAmerica	84210	84210	84210	84210	32225	1857	1620	1620	1620	155	155	2	2		SRR5985735	Public Health England
192924	2017-08-29	2015	United Kingdom	10.3.6_SouthAmerica	83934	83934	26545	26545	26545	1857	1620	1620	1620	155	155	2	2		SRR5985740	Public Health England
196362	2017-08-29	2015	United Kingdom	10.3.6_SouthAmerica	83947	26545	26545	26545	26545	1857	1620	1620	1620	155	155	2	2		SRR5985755	Public Health England
575132	2019-01-01	2018	United Kingdom	10.3.6_SouthAmerica	160419	160419	160419	160419	160419	1857	1620	1620	1620	155	155	2	2	Yes	SRR8380681	Public Health England
576405	2018-09-24	2018	United Kingdom	10.3.6_SouthAmerica	144862	19820	1857	1857	1857	1857	1620	1620	1620	155	155	2	2	Yes	SRR7892172	Public Health England
243873	2017-08-29	2016	United Kingdom	10.3.6_SouthAmerica	83937	19820	1857	1857	1857	1857	1620	1620	1620	155	155	2	2		SRR5985732	Public Health England
279515	2017-08-29	2016	United Kingdom	10.3.6_SouthAmerica	84015	32230	1857	1857	1857	1857	1620	1620	1620	155	155	2	2		SRR5985742	Public Health England
279553	2017-09-01	2016	United Kingdom	10.3.6_SouthAmerica	84015	32230	1857	1857	1857	1857	1620	1620	1620	155	155	2	2		SRR5989986	Public Health England
285660	2017-01-22	2016	United Kingdom	10.3.6_SouthAmerica	60322	60322	1857	1857	1857	1857	1620	1620	1620	155	155	2	2		SRR5193999	Public Health England
658623	2019-01-01	2018	United Kingdom	10.3.6_SouthAmerica	160398	68095	68095	68095	68095	1857	1620	1620	1620	155	155	2	2	Yes	SRR8377929	Public Health England
707210	2019-03-24	2019	United Kingdom	10.3.6_SouthAmerica	176553	19820	1857	1857	1857	1857	1620	1620	1620	155	155	2	2	Yes	SRR8772226	Public Health England
288903	2018-06-13	2016	United Kingdom	10.3.6_SouthAmerica	84015	32230	1857	1857	1857	1857	1620	1620	1620	155	155	2	2		SRR7297946	Public Health England
376181	2018-06-18	2017	United Kingdom	10.3.6_SouthAmerica	19820	19820	1857	1857	1857	1857	1620	1620	1620	155	155	2	2		SRR7351567	Public Health England
400315	2018-06-24	2017	United Kingdom	10.3.6_SouthAmerica	129773	19820	1857	1857	1857	1857	1620	1620	1620	155	155	2	2		SRR7414825	Public Health England
410866	2018-05-14	2017	United Kingdom	10.3.6_SouthAmerica	32232	32232	32232	1857	1857	1857	1620	1620	1620	155	155	2	2		SRR7159865	Public Health England
416376	2018-06-26	2017	United Kingdom	10.3.6_SouthAmerica	130737	19820	1857	1857	1857	1857	1620	1620	1620	155	155	2	2		SRR7426941	Public Health England
723633	2019-04-16	2019	United Kingdom	10.3.6_SouthAmerica	178061	26545	26545	26545	26545	1857	1620	1620	1620	155	155	2	2	Yes	SRR8893165	Public Health England
433606	2018-06-27	2017	United Kingdom	10.3.6_SouthAmerica	131105	19820	1857	1857	1857	1857	1620	1620	1620	155	155	2	2		SRR7439531	Public Health England
440069	2018-06-14	2017	United Kingdom	10.3.6_SouthAmerica	126949	126949	26385	26385	26385	26385	1620	1620	1620	155	155	2	2		SRR7310588	Public Health England
440805	2019-02-04	2017	United Kingdom	10.3.6_SouthAmerica	19820	19820	1857	1857	1857	1857	1620	1620	1620	155	155	2	2		SRR8526069	Public Health England
792595	2019-08-27	2019	United Kingdom	10.3.6_SouthAmerica	199269	199269	60784	60784	32225	1857	1620	1620	1620	155	155	2	2	Yes	SRR10018212	Public Health England
459968	2018-06-17	2017	United Kingdom	10.3.6_SouthAmerica	119607	119607	119607	119607	119607	1857	1620	1620	1620	155	155	2	2		SRR7349156	Public Health England
841378	2019-11-30	2019	United Kingdom	10.3.6_SouthAmerica	216888	68095	68095	68095	68095	1857	1620	1620	1620	155	155	2	2	Yes	SRR10513436	Public Health England
475741	2018-06-18	2018	United Kingdom	10.3.6_SouthAmerica	152193	152193	119607	119607	119607	1857	1620	1620	1620	155	155	2	2		SRR7350816	Public Health England
845690	2019-12-02	2019	United Kingdom	10.3.6_SouthAmerica	217468	217033	1857	1857	1857	1857	1620	1620	1620	155	155	2	2	Yes	SRR10561152	Public Health England
874835	2020-02-14	2020	United Kingdom	10.3.6_SouthAmerica	223700	223700	223700	26385	26385	26385	1620	1620	1620	155	155	2	2	Yes	SRR10948446	Public Health England
886703	2020-02-18	2020	United Kingdom	10.3.6_SouthAmerica	225273	217033	1857	1857	1857	1857	1620	1620	1620	155	155	2	2	Yes	SRR11096910	Public Health England
916942	2020-04-08	2020	United Kingdom	10.3.6_SouthAmerica	230118	135240	135240	135240	26545	1857	1620	1620	1620	155	155	2	2	Yes	SRR11479057	Public Health England
501571	2018-06-11	2018	United Kingdom	10.3.6_SouthAmerica	125764	19820	1857	1857	1857	1857	1620	1620	1620	155	155	2	2		SRR7286825	Public Health England
526148	2019-01-30	2018	United Kingdom	10.3.6_SouthAmerica	166232	19820	1857	1857	1857	1857	1620	1620	1620	155	155	2	2		SRR8503896	Public Health England
531305	2018-06-19	2018	United Kingdom	10.3.6_SouthAmerica	128350	19820	1857	1857	1857	1857	1620	1620	1620	155	155	2	2		SRR7358348	Public Health England
534040	2018-07-06	2018	United Kingdom	10.3.6_SouthAmerica	135240	135240	135240	135240	26545	1857	1620	1620	1620	155	155	2	2		SRR7475285	Public Health England
539017	2018-07-08	2018	United Kingdom	10.3.6_SouthAmerica	141875	19820	1857	1857	1857	1857	1620	1620	1620	155	155	2	2		SRR7480213	Public Health England
548859	2018-07-18	2018	United Kingdom	10.3.6_SouthAmerica	134667	19820	1857	1857	1857	1857	1620	1620	1620	155	155	2	2		SRR7533341	Public Health England
549082	2018-06-29	2018	United Kingdom	10.3.6_SouthAmerica	134667	19820	1857	1857	1857	1857	1620	1620	1620	155	155	2	2		SRR7450831	Public Health England
550678	2018-06-29	2018	United Kingdom	10.3.6_SouthAmerica	134597	19820	1857	1857	1857	1857	1620	1620	1620	155	155	2	2		SRR7451204	Public Health England
579950	2018-09-14	2018	United Kingdom	10.3.6_SouthAmerica	142692	19820	1857	1857	1857	1857	1620	1620	1620	155	155	2	2		SRR7828459	Public Health England
582307	2018-09-16	2018	United Kingdom	10.3.6_SouthAmerica	60784	60784	60784	60784	32225	1857	1620	1620	1620	155	155	2	2		SRR7841515	Public Health England
652086	2019-01-28	2018	United Kingdom	10.3.6_SouthAmerica	19820	19820	1857	1857	1857	1857	1620	1620	1620	155	155	2	2		SRR8492465	Public Health England
654002	2018-12-24	2018	United Kingdom	10.3.6_SouthAmerica	160094	19820	1857	1857	1857	1857	1620	1620	1620	155	155	2	2		SRR8367068	Public Health England
709084	2019-03-27	2019	United Kingdom	10.3.6_SouthAmerica	176553	19820	1857	1857	1857	1857	1620	1620	1620	155	155	2	2		SRR8788791	Public Health England
709116	2019-03-27	2019	United Kingdom	10.3.6_SouthAmerica	176553	19820	1857	1857	1857	1857	1620	1620	1620	155	155	2	2		SRR8788795	Public Health England
712249	2019-04-02	2019	United Kingdom	10.3.6_SouthAmerica	176553	19820	1857	1857	1857	1857	1620	1620	1620	155	155	2	2		SRR8833279	Public Health England
716031	2019-04-03	2019	United Kingdom	10.3.6_SouthAmerica	176553	19820	1857	1857	1857	1857	1620	1620	1620	155	155	2	2		SRR8839580	Public Health England
723631	2019-04-16	2019	United Kingdom	10.3.6_SouthAmerica	178050	26545	26545	26545	26545	1857	1620	1620	1620	155	155	2	2		SRR8893156	Public Health England
728371	2019-04-25	2019	United Kingdom	10.3.6_SouthAmerica	178050	26545	26545	26545	26545	1857	1620	1620	1620	155	155	2	2		SRR8951814	Public Health England
748885	2019-06-11	2019	United Kingdom	10.3.6_SouthAmerica	178050	26545	26545	26545	26545	1857	1620	1620	1620	155	155	2	2		SRR9261304	Public Health England
756213	2019-06-12	2019	United Kingdom	10.3.6_SouthAmerica	185575	32232	32232	1857	1857	1857	1620	1620	1620	155	155	2	2		SRR9273943	Public Health England
795357	2019-08-29	2019	United Kingdom	10.3.6_SouthAmerica	192437	26545	26545	26545	26545	1857	1620	1620	1620	155	155	2	2		SRR10032591	Public Health England
843968	2019-11-30	2019	United Kingdom	10.3.6_SouthAmerica	217033	217033	1857	1857	1857	1857	1620	1620	1620	155	155	2	2		SRR10542559	Public Health England
988304	2020-09-20	2020	United Kingdom	10.3.6_SouthAmerica	83936	26385	26385	26385	26385	26385	1620	1620	1620	155	155	2	2		SRR12676775	Public Health England
1034850	2020-11-27	2020	United Kingdom	10.3.6_SouthAmerica	83936	26385	26385	26385	26385	26385	1620	1620	1620	155	155	2	2		SRR13153678	Public Health England
1793123	2022-12-21	2022	United Kingdom	10.3.6_SouthAmerica	341046	341046	341046	1857	1857	1857	1620	1620	1620	155	155	2	2		SRR22829779	Gastrointestinal Bacteria Reference Unit, Public Health England
1806148	2023-01-09	2022	United Kingdom	10.3.6_SouthAmerica	344379	344379	344379	344379	344379	1857	1620	1620	1620	155	155	2	2		SRR23000203	Gastrointestinal Bacteria Reference Unit, Public Health England
1597361	2022-06-07	2022	United Kingdom	10.3.6_SouthAmerica	308047	308047	308047	60784	32225	1857	1620	1620	1620	155	155	2	2		SRR18350728	Public Health England
1612182	2022-06-07	2022	United Kingdom	10.3.6_SouthAmerica	304740	19820	1857	1857	1857	1857	1620	1620	1620	155	155	2	2		SRR18762160	Public Health England
1613342	2022-06-07	2022	United Kingdom	10.3.6_SouthAmerica	304740	19820	1857	1857	1857	1857	1620	1620	1620	155	155	2	2		SRR18761881	Public Health England
1623275	2022-05-09	2022	United Kingdom	10.3.6_SouthAmerica	304740	19820	1857	1857	1857	1857	1620	1620	1620	155	155	2	2		SRR19100855	Public Health England
1631517	2022-06-07	2022	United Kingdom	10.3.6_SouthAmerica	309164	19820	1857	1857	1857	1857	1620	1620	1620	155	155	2	2		SRR19334860	Public Health England
1638549	2022-06-08	2022	United Kingdom	10.3.6_SouthAmerica	310076	310076	1857	1857	1857	1857	1620	1620	1620	155	155	2	2		SRR19494482	Public Health England
1644779	2022-06-14	2022	United Kingdom	10.3.6_SouthAmerica	311820	19820	1857	1857	1857	1857	1620	1620	1620	155	155	2	2		SRR19638820	Public Health England
1810740	2023-01-12	2023	United Kingdom	10.3.6_SouthAmerica	344949	344949	344949	1857	1857	1857	1620	1620	1620	155	155	2	2		SRR23052166	Gastrointestinal Bacteria Reference Unit, Public Health England
21131	2015-12-23		United Kingdom	10.3.6_SouthAmerica	7157	7157	7157	7157	7092	1857	1620	1620	1620	155	155	2	2		SRR3049074	Public Health England
37061	2015-12-23		United Kingdom	10.3.6_SouthAmerica	7092	7092	7092	7092	7092	1857	1620	1620	1620	155	155	2	2		SRR3049000	Public Health England
PNUSAS011906	2017-05-23	2016	United States	10.3.6_SouthAmerica	71227	60784	60784	60784	32225	1857	1620	1620	1620	155	155	2	2		SRR5583846	Centers for Disease Control and Prevention - PulseNet
PNUSAS014337	2017-06-02	2017	United States	10.3.6_SouthAmerica	73697	19820	1857	1857	1857	1857	1620	1620	1620	155	155	2	2		SRR5642019	Centers for Disease Control and Prevention - PulseNet
2016K-0213	2017-05-23		United States	10.3.6_SouthAmerica	71227	60784	60784	60784	32225	1857	1620	1620	1620	155	155	2	2		SRR5583008	Centers for Disease Control and Prevention - PulseNet
PNUSAS005183	2016-11-30	2016	United States	10.3.6_SouthAmerica	54510	54510	54510	54510	32225	1857	1620	1620	1620	155	155	2	2		SRR5060594	Centers for Disease Control and Prevention Enteric Diseases Laboratory Branch
PNUSAS030221	2017-12-20	2017	United States	10.3.6_SouthAmerica	102968	102968	102968	102968	102968	1857	1620	1620	1620	155	155	2	2		SRR6396480	Centers for Disease Control and Prevention Enteric Diseases Laboratory Branch
PNUSAS032786	2018-02-08	2017	United States	10.3.6_SouthAmerica	60784	60784	60784	60784	32225	1857	1620	1620	1620	155	155	2	2		SRR6682107	Centers for Disease Control and Prevention Enteric Diseases Laboratory Branch
PNUSAS033523	2018-02-08	2018	United States	10.3.6_SouthAmerica	108676	108676	108676	108676	108676	1857	1620	1620	1620	155	155	2	2		SRR6682044	Centers for Disease Control and Prevention Enteric Diseases Laboratory Branch
PNUSAS033773	2018-02-15	2018	United States	10.3.6_SouthAmerica	109611	19820	1857	1857	1857	1857	1620	1620	1620	155	155	2	2		SRR6726293	Centers for Disease Control and Prevention Enteric Diseases Laboratory Branch
PNUSAS037648	2019-11-18	2018	United States	10.3.6_SouthAmerica	215688	159538	119499	1857	1857	1857	1620	1620	1620	155	155	2	2		SRR6926834	Centers for Disease Control and Prevention Enteric Diseases Laboratory Branch
201608990	2022-12-29	2016	France	10.3.6_SouthAmerica	54510	54510	54510	54510	32225	1857	1620	1620	1620	155	155	2	2	yes	ERR12736562	F.X.Weill, Institut Pasteur
201609017	2022-12-29	2016	France	10.3.6_SouthAmerica	341898	60784	60784	60784	32225	1857	1620	1620	1620	155	155	2	2	yes	ERR12736563	F.X.Weill, Institut Pasteur
PNUSAS038431	2018-04-12		United States	10.3.6_SouthAmerica	116595	116595	1857	1857	1857	1857	1620	1620	1620	155	155	2	2		SRR6994762	Centers for Disease Control and Prevention Enteric Diseases Laboratory Branch
201700708	2022-12-29	2017	France	10.3.6_SouthAmerica	341884	68095	68095	68095	68095	1857	1620	1620	1620	155	155	2	2	yes	ERR12736542	F.X.Weill, Institut Pasteur
PNUSAS038415	2018-05-03		United States	10.3.6_SouthAmerica	119499	119499	119499	1857	1857	1857	1620	1620	1620	155	155	2	2		SRR7105186	Centers for Disease Control and Prevention Enteric Diseases Laboratory Branch
201704389	2022-12-29	2017	France	10.3.6_SouthAmerica	341938	341938	341938	68095	68095	1857	1620	1620	1620	155	155	2	2	yes	ERR12736569	F.X.Weill, Institut Pasteur
201707432	2022-12-29	2017	France	10.3.6_SouthAmerica	341931	341931	1857	1857	1857	1857	1620	1620	1620	155	155	2	2	yes	ERR12736575	F.X.Weill, Institut Pasteur
201708949	2022-12-29	2017	France	10.3.6_SouthAmerica	341928	19820	1857	1857	1857	1857	1620	1620	1620	155	155	2	2	yes	ERR12736581	F.X.Weill, Institut Pasteur
201710889	2022-12-29	2017	France	10.3.6_SouthAmerica	341937	19820	1857	1857	1857	1857	1620	1620	1620	155	155	2	2	yes	ERR12736583	F.X.Weill, Institut Pasteur
201711516	2022-12-29	2017	France	10.3.6_SouthAmerica	341927	341927	32232	1857	1857	1857	1620	1620	1620	155	155	2	2	yes	ERR12736584	F.X.Weill, Institut Pasteur
201711578	2022-12-29	2017	France	10.3.6_SouthAmerica	341933	68095	68095	68095	68095	1857	1620	1620	1620	155	155	2	2	yes	ERR12736585	F.X.Weill, Institut Pasteur
201800151	2022-12-29	2018	France	10.3.6_SouthAmerica	341959	341959	341959	1857	1857	1857	1620	1620	1620	155	155	2	2	yes	ERR12736586	F.X.Weill, Institut Pasteur
201800826	2022-12-29	2018	France	10.3.6_SouthAmerica	341949	68095	68095	68095	68095	1857	1620	1620	1620	155	155	2	2	yes	ERR12736588	F.X.Weill, Institut Pasteur
201803542	2022-12-29	2018	France	10.3.6_SouthAmerica	341883	19820	1857	1857	1857	1857	1620	1620	1620	155	155	2	2	yes	ERR12736545	F.X.Weill, Institut Pasteur
201807370	2022-12-29	2018	France	10.3.6_SouthAmerica	341941	19820	1857	1857	1857	1857	1620	1620	1620	155	155	2	2	yes	ERR12736592	F.X.Weill, Institut Pasteur
PNUSAS043326	2018-07-03		United States	10.3.6_SouthAmerica	60784	60784	60784	60784	32225	1857	1620	1620	1620	155	155	2	2		SRR7466479	Centers for Disease Control and Prevention Enteric Diseases Laboratory Branch
201809295	2022-12-29	2018	France	10.3.6_SouthAmerica	341946	341946	60784	60784	32225	1857	1620	1620	1620	155	155	2	2	yes	ERR12736595	F.X.Weill, Institut Pasteur
PNUSAS044353	2018-07-12		United States	10.3.6_SouthAmerica	136442	136442	136442	136442	32225	1857	1620	1620	1620	155	155	2	2		SRR7504713	Centers for Disease Control and Prevention Enteric Diseases Laboratory Branch
201900702	2022-12-29	2019	France	10.3.6_SouthAmerica	341878	341878	341878	341878	341878	1857	1620	1620	1620	155	155	2	2	yes	ERR12736546	F.X.Weill, Institut Pasteur
201903679	2022-12-29	2019	France	10.3.6_SouthAmerica	341939	341939	1857	1857	1857	1857	1620	1620	1620	155	155	2	2	yes	ERR12736599	F.X.Weill, Institut Pasteur
201904044	2022-12-29	2019	France	10.3.6_SouthAmerica	341945	19820	1857	1857	1857	1857	1620	1620	1620	155	155	2	2	yes	ERR12736601	F.X.Weill, Institut Pasteur
201905260	2022-12-29	2019	France	10.3.6_SouthAmerica	341935	341935	341935	1857	1857	1857	1620	1620	1620	155	155	2	2	yes	ERR12736603	F.X.Weill, Institut Pasteur
201907215	2021-03-10	2019	France	10.3.6_SouthAmerica	256893	19820	1857	1857	1857	1857	1620	1620	1620	155	155	2	2	yes	ERR12736605	F.X.Weill, Institut Pasteur
201907308	2022-12-29	2019	France	10.3.6_SouthAmerica	342093	342093	342093	26385	26385	26385	1620	1620	1620	155	155	2	2	yes	ERR12736606	F.X.Weill, Institut Pasteur
201908452	2022-12-29	2019	France	10.3.6_SouthAmerica	342089	342089	342089	1857	1857	1857	1620	1620	1620	155	155	2	2	yes	ERR12736608	F.X.Weill, Institut Pasteur
202000134	2022-12-29	2020	France	10.3.6_SouthAmerica	342087	342087	342087	68095	68095	1857	1620	1620	1620	155	155	2	2	yes	ERR12736610	F.X.Weill, Institut Pasteur
202107757	2021-10-25	2021	France	10.3.6_SouthAmerica	289426	289426	1857	1857	1857	1857	1620	1620	1620	155	155	2	2	yes	ERR12736619	F.X.Weill, Institut Pasteur
PNUSAS007333	2017-01-25	2016	United States	10.3.6_SouthAmerica	60784	60784	60784	60784	32225	1857	1620	1620	1620	155	155	2	2		SRR5201342	PulseNet Next Generation Subtyping Methods Unit
PNUSAS258782	2022-02-23	2022	United States	10.3.6_SouthAmerica	299073	135240	135240	135240	26545	1857	1620	1620	1620	155	155	2	2		SRR18061727	PulseNet Next Generation Subtyping Methods Unit
PNUSAS320672	2022-12-08	2022	United States	10.3.6_SouthAmerica	338312	338312	1857	1857	1857	1857	1620	1620	1620	155	155	2	2		SRR22548319	PulseNet Next Generation Subtyping Methods Unit
PNUSAS325702	2023-01-07	2022	United States	10.3.6_SouthAmerica	344192	344192	344192	344192	344192	1857	1620	1620	1620	155	155	2	2		SRR22988557	PulseNet Next Generation Subtyping Methods Unit
PNUSAS329742	2023-01-31	2023	United States	10.3.6_SouthAmerica	347597	347597	347597	347597	347597	1857	1620	1620	1620	155	155	2	2		SRR23273835	PulseNet Next Generation Subtyping Methods Unit
PNUSAS340117	2023-03-31	2023	United States	10.3.6_SouthAmerica	353937	353937	353937	1857	1857	1857	1620	1620	1620	155	155	2	2		SRR24018639	PulseNet Next Generation Subtyping Methods Unit
PNUSAS340754	2023-04-05	2023	United States	10.3.6_SouthAmerica	354648	354648	1857	1857	1857	1857	1620	1620	1620	155	155	2	2		SRR24048960	PulseNet Next Generation Subtyping Methods Unit
PNUSAS008939	2017-03-11		United States	10.3.6_SouthAmerica	65410	60784	60784	60784	32225	1857	1620	1620	1620	155	155	2	2		SRR5335997	PulseNet Next Generation Subtyping Methods Unit
PNUSAS017387	2017-07-11		United States	10.3.6_SouthAmerica	77382	77382	77382	1857	1857	1857	1620	1620	1620	155	155	2	2		SRR5812015	PulseNet Next Generation Subtyping Methods Unit
PNUSAS020885	2017-08-22		United States	10.3.6_SouthAmerica	83117	60784	60784	60784	32225	1857	1620	1620	1620	155	155	2	2		SRR5951448	PulseNet Next Generation Subtyping Methods Unit
PNUSAS021758	2017-09-07		United States	10.3.6_SouthAmerica	85651	85651	60784	60784	32225	1857	1620	1620	1620	155	155	2	2		SRR6014215	PulseNet Next Generation Subtyping Methods Unit
PNUSAS021755	2017-09-07		United States	10.3.6_SouthAmerica	87048	85651	60784	60784	32225	1857	1620	1620	1620	155	155	2	2		SRR6014217	PulseNet Next Generation Subtyping Methods Unit
PNUSAS021754	2017-09-07		United States	10.3.6_SouthAmerica	85691	85651	60784	60784	32225	1857	1620	1620	1620	155	155	2	2		SRR6014218	PulseNet Next Generation Subtyping Methods Unit
PNUSAS021756	2017-09-07		United States	10.3.6_SouthAmerica	85651	85651	60784	60784	32225	1857	1620	1620	1620	155	155	2	2		SRR6014219	PulseNet Next Generation Subtyping Methods Unit
PNUSAS021759	2017-09-07		United States	10.3.6_SouthAmerica	85651	85651	60784	60784	32225	1857	1620	1620	1620	155	155	2	2		SRR6014221	PulseNet Next Generation Subtyping Methods Unit
PNUSAS083039	2019-07-17		United States	10.3.6_SouthAmerica	192437	26545	26545	26545	26545	1857	1620	1620	1620	155	155	2	2		SRR9697072	PulseNet Next Generation Subtyping Methods Unit
PNUSAS077062	2019-07-23		United States	10.3.6_SouthAmerica	193443	19820	1857	1857	1857	1857	1620	1620	1620	155	155	2	2		SRR9729560	PulseNet Next Generation Subtyping Methods Unit
PNCS013056	2020-11-05	2016	Canada	10.3.6_SouthAmerica	32232	32232	32232	1857	1857	1857	1620	1620	1620	155	155	2	2		SRR12980306	National Microbiology Laboratory
PNCS011135	2020-11-26	2017	Canada	10.3.6_SouthAmerica	249628	249628	249628	249628	249628	1857	1620	1620	1620	155	155	2	2		SRR13145369	National Microbiology Laboratory
PNCS010912	2020-11-26	2017	Canada	10.3.6_SouthAmerica	249620	249620	119607	119607	119607	1857	1620	1620	1620	155	155	2	2		SRR13145370	National Microbiology Laboratory
201607893	2022-12-29	2016	France	10.3.7_NorthAfrica2	341892	341892	341892	341892	261555	37812	1620	1620	1620	155	155	2	2	yes	ERR12736560	F.X.Weill, Institut Pasteur
PNCS011525	2020-12-06	2017	Canada	10.3.6_SouthAmerica	250272	249628	249628	249628	249628	1857	1620	1620	1620	155	155	2	2		SRR13202893	National Microbiology Laboratory
PNCS013632	2020-12-09	2017	Canada	10.3.6_SouthAmerica	250804	1857	1857	1857	1857	1857	1620	1620	1620	155	155	2	2		SRR13220796	National Microbiology Laboratory
PNCS002814	2021-02-21	2017	Canada	10.3.6_SouthAmerica	249620	249620	119607	119607	119607	1857	1620	1620	1620	155	155	2	2		SRR13748107	National Microbiology Laboratory
PNCS004793	2021-02-23	2017	Canada	10.3.6_SouthAmerica	19820	19820	1857	1857	1857	1857	1620	1620	1620	155	155	2	2		SRR13762551	National Microbiology Laboratory
PNCS002954	2021-03-01	2017	Canada	10.3.6_SouthAmerica	261497	261497	261497	261497	32225	1857	1620	1620	1620	155	155	2	2		SRR13783969	National Microbiology Laboratory
PNCS004792	2021-03-23	2017	Canada	10.3.6_SouthAmerica	19820	19820	1857	1857	1857	1857	1620	1620	1620	155	155	2	2		SRR14008813	National Microbiology Laboratory
304577	2018-06-11	2016	United Kingdom	10.3.8.1_SouthAsia2	125860	125860	125860	125860	125860	1857	1620	1620	1620	155	155	2	2	Yes	SRR7286960	Public Health England
723623	2019-04-22	2019	United Kingdom	10.3.8.1_SouthAsia2	178827	178827	178827	178827	178827	1857	1620	1620	1620	155	155	2	2	Yes	SRR8936140	Public Health England
PNCS010696	2022-06-07	2017	Canada	10.3.6_SouthAmerica	308731	32232	32232	1857	1857	1857	1620	1620	1620	155	155	2	2		SRR18333046	National Microbiology Laboratory
PNUSAS029914	2017-12-19	2017	United States	10.3.7_NorthAfrica2	102595	102595	102595	102595	102595	37812	1620	1620	1620	155	155	2	2		SRR6386398	PulseNet Next Generation Subtyping Methods Unit
PNUSAS023302	2017-09-28		United States	10.3.8	88363	88363	88363	88363	88363	1857	1620	1620	1620	155	155	2	2		SRR6107208	PulseNet Next Generation Subtyping Methods Unit
PNUSAS023173	2017-09-28		United States	10.3.8	88363	88363	88363	88363	88363	1857	1620	1620	1620	155	155	2	2		SRR6107255	PulseNet Next Generation Subtyping Methods Unit
PNCS011535	2020-12-06	2017	Canada	10.3.8	250273	250273	250273	250273	250273	250273	250273	1620	1620	155	155	2	2		SRR13202894	National Microbiology Laboratory
300661	2018-06-26	2016	United Kingdom	10.3.8.1_SouthAsia2	130745	125860	125860	125860	125860	1857	1620	1620	1620	155	155	2	2		SRR7427011	Public Health England
800594	2019-09-11	2019	United Kingdom	10.3.8.1_SouthAsia2	201180	201180	201180	23788	23788	1857	1620	1620	1620	155	155	2	2		SRR10096510	Public Health England
801116	2019-09-11	2019	United Kingdom	10.3.8.1_SouthAsia2	201180	201180	201180	23788	23788	1857	1620	1620	1620	155	155	2	2		SRR10096464	Public Health England
1101849	2021-02-22	2021	United Kingdom	10.3.8.1_SouthAsia2	260737	260737	260737	260737	23788	1857	1620	1620	1620	155	155	2	2		SRR13755486	Public Health England
1101968	2021-08-09	2021	United Kingdom	10.3.8.1_SouthAsia2	260737	260737	260737	260737	23788	1857	1620	1620	1620	155	155	2	2		SRR15334934	Public Health England
1144352	2021-03-30	2021	United Kingdom	10.3.8.1_SouthAsia2	260737	260737	260737	260737	23788	1857	1620	1620	1620	155	155	2	2		SRR14084422	Public Health England
1144353	2021-03-30	2021	United Kingdom	10.3.8.1_SouthAsia2	260737	260737	260737	260737	23788	1857	1620	1620	1620	155	155	2	2		SRR14084424	Public Health England
1167548	2021-05-09	2021	United Kingdom	10.3.8.1_SouthAsia2	260737	260737	260737	260737	23788	1857	1620	1620	1620	155	155	2	2		SRR14472215	Public Health England
1769911	2022-11-28	2022	United Kingdom	10.3.8.1_SouthAsia2	303818	301243	201180	23788	23788	1857	1620	1620	1620	155	155	2	2		SRR22422942	Gastrointestinal Bacteria Reference Unit, Public Health England
1771058	2022-11-28	2022	United Kingdom	10.3.8.1_SouthAsia2	303818	301243	201180	23788	23788	1857	1620	1620	1620	155	155	2	2		SRR22422940	Gastrointestinal Bacteria Reference Unit, Public Health England
1771114	2022-11-28	2022	United Kingdom	10.3.8.1_SouthAsia2	303818	301243	201180	23788	23788	1857	1620	1620	1620	155	155	2	2		SRR22422962	Gastrointestinal Bacteria Reference Unit, Public Health England
1613186	2022-06-07	2022	United Kingdom	10.3.8.1_SouthAsia2	303818	301243	201180	23788	23788	1857	1620	1620	1620	155	155	2	2		SRR18762053	Public Health England
1616353	2022-04-25	2022	United Kingdom	10.3.8.1_SouthAsia2	303818	301243	201180	23788	23788	1857	1620	1620	1620	155	155	2	2		SRR18894051	Public Health England
2014K-0560	2015-08-27		United States	10.3.8.1_SouthAsia2	23788	23788	23788	23788	23788	1857	1620	1620	1620	155	155	2	2		SRR1824460	Centers for Disease Control and Prevention - PulseNet
PNUSAS331811	2023-02-09	2023	United States	10.3.8.1_SouthAsia2	348471	348471	348471	348471	348471	1857	1620	1620	1620	155	155	2	2		SRR23373623	PulseNet Next Generation Subtyping Methods Unit
421207	2018-09-20	2017	United Kingdom	10.3.8.2_Turkey3	32237	32237	17705	17705	17705	1857	1620	1620	1620	155	155	2	2	Yes	SRR7879553	Public Health England
201609244	2022-12-29	2016	France	10.3.8.2_Turkey3	341881	341881	341881	17705	17705	1857	1620	1620	1620	155	155	2	2	yes	ERR12736540	F.X.Weill, Institut Pasteur
201610803	2022-12-29	2016	France	10.3.8.2_Turkey3	341886	341886	17705	17705	17705	1857	1620	1620	1620	155	155	2	2	yes	ERR12736564	F.X.Weill, Institut Pasteur
PNUSAS073461	2019-04-29		United States	10.3.8.1_SouthAsia2	178827	178827	178827	178827	178827	1857	1620	1620	1620	155	155	2	2		SRR8987489	PulseNet Next Generation Subtyping Methods Unit
83678	2015-08-27	2014	United Kingdom	10.3.8.2_Turkey3	28196	28196	17705	17705	17705	1857	1620	1620	1620	155	155	2	2		SRR1967440	Gastrointestinal Bacteria Reference Unit, Public Health England
201706695	2022-12-29	2017	France	10.3.8.2_Turkey3	341925	32237	17705	17705	17705	1857	1620	1620	1620	155	155	2	2	yes	ERR12736573	F.X.Weill, Institut Pasteur
201710471	2022-12-29	2017	France	10.3.8.2_Turkey3	341930	341930	341930	17705	17705	1857	1620	1620	1620	155	155	2	2	yes	ERR12736582	F.X.Weill, Institut Pasteur
201807193	2022-12-29	2018	France	10.3.8.2_Turkey3	341943	341943	17705	17705	17705	1857	1620	1620	1620	155	155	2	2	yes	ERR12736591	F.X.Weill, Institut Pasteur
161054	2017-09-01	2015	United Kingdom	10.3.8.2_Turkey3	84256	84256	17705	17705	17705	1857	1620	1620	1620	155	155	2	2		SRR5989990	Public Health England
452518	2019-02-04	2017	United Kingdom	10.3.8.3_MiddleEast3	113445	113445	113445	113445	113445	53828	1620	1620	1620	155	155	2	2	Yes	SRR8524709	Public Health England
529880	2018-06-28	2018	United Kingdom	10.3.8.3_MiddleEast3	113445	113445	113445	113445	113445	53828	1620	1620	1620	155	155	2	2	Yes	SRR7443872	Public Health England
535359	2018-06-18	2018	United Kingdom	10.3.8.3_MiddleEast3	152213	113445	113445	113445	113445	53828	1620	1620	1620	155	155	2	2	Yes	SRR7350793	Public Health England
209992	2017-08-29	2016	United Kingdom	10.3.8.2_Turkey3	32233	32228	17705	17705	17705	1857	1620	1620	1620	155	155	2	2		SRR5985743	Public Health England
541373	2018-06-27	2018	United Kingdom	10.3.8.3_MiddleEast3	125099	113445	113445	113445	113445	53828	1620	1620	1620	155	155	2	2	Yes	SRR7439523	Public Health England
225088	2017-09-01	2016	United Kingdom	10.3.8.2_Turkey3	32233	32228	17705	17705	17705	1857	1620	1620	1620	155	155	2	2		SRR5989988	Public Health England
304418	2017-08-24	2016	United Kingdom	10.3.8.2_Turkey3	83429	32228	17705	17705	17705	1857	1620	1620	1620	155	155	2	2		SRR5957752	Public Health England
451998	2018-09-24	2017	United Kingdom	10.3.8.3_MiddleEast3	113445	113445	113445	113445	113445	53828	1620	1620	1620	155	155	2	2		SRR7890213	Public Health England
538444	2019-01-29	2018	United Kingdom	10.3.8.3_MiddleEast3	152213	113445	113445	113445	113445	53828	1620	1620	1620	155	155	2	2		SRR8499154	Public Health England
201800797	2022-12-29	2018	France	10.3.8.3_MiddleEast3	341944	341944	113445	113445	113445	53828	1620	1620	1620	155	155	2	2	yes	ERR12736587	F.X.Weill, Institut Pasteur
1008776	2020-10-26	2020	United Kingdom	10.3.8.4_MiddleEast4	246822	246822	246822	246822	246822	1857	1620	1620	1620	155	155	2	2	Yes	SRR12887424	Public Health England
545295	2019-01-29	2018	United Kingdom	10.3.8.3_MiddleEast3	125099	113445	113445	113445	113445	53828	1620	1620	1620	155	155	2	2		SRR8499141	Public Health England
201907724	2022-12-29	2019	France	10.3.8.4_MiddleEast4	342095	342095	342095	342095	246822	1857	1620	1620	1620	155	155	2	2	yes	ERR12736607	F.X.Weill, Institut Pasteur
201705796	2021-03-10	2017	France	10.3.8.5_EuropeNorthAfrica	256896	256896	256896	256896	256896	1857	1620	1620	1620	155	155	2	2	yes	ERR12736571	F.X.Weill, Institut Pasteur
621380	2018-11-20	2018	United Kingdom	10.3.8.3_MiddleEast3	153949	113445	113445	113445	113445	53828	1620	1620	1620	155	155	2	2		SRR8204792	Public Health England
PNUSAS042085	2018-06-08		United States	10.3.8.3_MiddleEast3	125099	113445	113445	113445	113445	53828	1620	1620	1620	155	155	2	2		SRR7280143	Centers for Disease Control and Prevention Enteric Diseases Laboratory Branch
416382	2018-06-01	2017	United Kingdom	2.1	123728	123728	123728	123728	29151	17706	17706	17706	1620	155	155	2	2	Yes	SRR7244400	Public Health England
493366	2019-02-04	2018	United Kingdom	2.1	168664	168664	168664	168664	168664	168664	168664	17706	1620	155	155	2	2	Yes	SRR8523817	Public Health England
524183	2018-07-01	2018	United Kingdom	2.1	131992	131992	123728	123728	29151	17706	17706	17706	1620	155	155	2	2	Yes	SRR7456920	Public Health England
PNUSAS074447	2019-05-07		United States	10.3.8.3_MiddleEast3	180117	180117	180117	113445	113445	53828	1620	1620	1620	155	155	2	2		SRR9016910	PulseNet Next Generation Subtyping Methods Unit
1016696	2021-08-09	2020	United Kingdom	10.3.8.4_MiddleEast4	246822	246822	246822	246822	246822	1857	1620	1620	1620	155	155	2	2		SRR15334682	Public Health England
39461	2015-08-27	2014	United Kingdom	2.1	29151	29151	29151	29151	29151	17706	17706	17706	1620	155	155	2	2		SRR1968410	Public Health England - Gastrointestinal Bacteria Reference Unit
41977	2015-08-27	2014	United Kingdom	2.1.1_Turkey1	27562	27562	27562	27562	27562	27562	17706	17706	1620	155	155	2	2	Yes	SRR1966704	Gastrointestinal Bacteria Reference Unit, Public Health England
202000832	2022-12-29	2020	France	7.3	342086	342086	342086	342086	342086	37832	4708	1620	1620	155	155	2	2	yes	ERR12736612	F.X.Weill, Institut Pasteur
202002228	2021-03-10	2020	France	7.3	256894	256894	256894	256894	256894	37832	4708	1620	1620	155	155	2	2	yes	ERR12736613	F.X.Weill, Institut Pasteur
1120250	2021-03-09	2021	United Kingdom	2.1	262694	262694	262694	262694	262694	262694	262694	17706	1620	155	155	2	2		SRR13871367	Public Health England
1120332	2021-08-09	2021	United Kingdom	2.1	280216	262694	262694	262694	262694	262694	262694	17706	1620	155	155	2	2		SRR15334675	Public Health England
201806893	2022-12-29	2018	France	7.3.1_NorthAfrica1	341940	341940	341940	4708	4708	4708	4708	1620	1620	155	155	2	2	yes	ERR12736590	F.X.Weill, Institut Pasteur
201905617	2022-12-29	2019	France	7.3.1_NorthAfrica1	342090	342090	342090	342090	4708	4708	4708	1620	1620	155	155	2	2	yes	ERR12736604	F.X.Weill, Institut Pasteur
201610287	2022-12-29	2016	France	7.3.2_BAOR	341882	341882	341882	341882	341882	341882	4708	1620	1620	155	155	2	2	yes	ERR12736541	F.X.Weill, Institut Pasteur
201903854	2022-12-29	2019	France	7.3.2_BAOR	341957	341957	341957	341957	341957	168757	4708	1620	1620	155	155	2	2	yes	ERR12736600	F.X.Weill, Institut Pasteur
1682959	2022-08-20	2022	United Kingdom	2.1	320029	320029	320029	320029	320029	17706	17706	17706	1620	155	155	2	2		SRR21129909	Public Health England
201600075	2022-12-29	2016	France	9.1_France	341879	341879	341879	341879	341879	69918	41265	1620	1620	155	155	2	2	yes	ERR12736538	F.X.Weill, Institut Pasteur
201703686	2021-03-10	2017	France	9.1_France	256880	256880	256880	256880	256880	69918	41265	1620	1620	155	155	2	2	yes	ERR12736568	F.X.Weill, Institut Pasteur
201800858	2022-12-29	2018	France	9.1_France	341947	341947	341947	341947	261618	69918	41265	1620	1620	155	155	2	2	yes	ERR12736589	F.X.Weill, Institut Pasteur
201808772	2022-12-29	2018	France	9.1_France	341948	341948	341948	341948	341948	341948	341948	1620	1620	155	155	2	2	yes	ERR12736594	F.X.Weill, Institut Pasteur
201901362	2022-12-29	2019	France	9.1_France	341934	341934	341934	341934	341934	69918	41265	1620	1620	155	155	2	2	yes	ERR12736598	F.X.Weill, Institut Pasteur
201904345	2022-12-29	2019	France	9.1_France	341942	341942	341942	341942	341942	69918	41265	1620	1620	155	155	2	2	yes	ERR12736602	F.X.Weill, Institut Pasteur
202100515	2021-04-12	2021	France	10.1.1_Europe1	259997	259997	259997	256882	256882	5867	1620	1620	1620	155	155	2	2	yes	ERR12736615	F.X.Weill, Institut Pasteur
202101415	2021-04-12	2021	France	9.1_France	259999	259999	259999	259999	259999	259999	259999	259999	1620	155	155	2	2	yes	ERR12736616	F.X.Weill, Institut Pasteur
202107503	2021-10-25	2021	France	9.1_France	289427	289427	289427	289427	289427	69918	41265	1620	1620	155	155	2	2	yes	ERR12736618	F.X.Weill, Institut Pasteur
