# Supplementary material for: Genomic perspective on the bacillus causing paratyphoid B fever
Source: Research Square preprint supplement (doi:10.21203/rs.3.rs-4502330/v1), 2024-06-18
Supplement: Supplementary file 7 [file bca1e4ad785f2ffb0d255d3a.xlsx]

## Sheet: Data 1
Tree order	Strain name	Alternative na me	Year of isolation	Year for Beast	Included in Beast	Country of sampling/isolation	International travel reported for European patients when known	Country/inferred country of contamination	Inferred Continent of contamination	Inferred Region of contamination (UN Geoscheme)	Inferred Region of contamination (for Figures)	Sample origin	Sample type	Place of sampling (Water)	Species	Serotype prediction	STM 3356 d-Tar- specific SNV	Phage type	aroC	dnaN	hemD	hisD	purE	sucA	thrA	MLST	BAPS lineage	Genotype	cgMLST HC2	HC5	HC10	HC20	HC50	HC100	HC200	HC400	HC900	HC2000	HC2600	HC2850	Antimicrobial susceptibility testing	NAL MIC (mg/L)	CIP MIC (mg/L)	Antimicrobial resistance determinants	Chromosomal coverage (%)	Average chromosomal read depth	% reads mapped	Total reads	Num SNVs
1	NCTC 8299	543929	1945	1945	Yes	Mandatory Palestine	NA	Mandatory Palestine	Asia	Western Asia	Middle East	Human	Stools	NA	S. enterica	Paratyphi B	Present	Not available	aroC(1)	dnaN(14)	hemD(24)	hisD(14)	purE(37)	sucA(19)	thrA(8)	5113	Lineage 1	1	137805	137805	137805	137805	137805	137805	137805	1620	155	155	2	2				none	98.52	52.13	97.8029	2494522	1425
2	63-90	B90-590	1990	1990	Yes	France	Turkey	Turkey	Asia	Western Asia	Middle East	Human	Blood	NA	S. enterica	Paratyphi B	Present	Beccles	aroC(1)	dnaN(14)	hemD(24)	hisD(14)	purE(37)	sucA(19)	thrA(8)	5113	Lineage 1	1	341322	341322	341322	341286	341286	341286	137805	1620	155	155	2	2				none	98.74	119.97	89.368	5891578	1442
3	42-88	B88-905	1988	1988	Yes	France	Turkey	Turkey	Asia	Western Asia	Middle East	Human	Stools	NA	S. enterica	Paratyphi B	Present	RDNC	aroC(1)	dnaN(14)	hemD(24)	hisD(14)	purE(37)	sucA(19)	thrA(8)	5113	Lineage 1	1	341286	341286	341286	341286	341286	341286	137805	1620	155	155	2	2				none	99.07	141.34	97.9217	5411904	1402
4	173-73	B73-112	1973	1973	Yes	France	NA	France	Europe	Western Europe	Europe	Environment	Sea water	NA	S. enterica	Paratyphi B	Present	1	aroC(2)	dnaN(14)	hemD(24)	hisD(14)	purE(37)	sucA(19)	thrA(8)	86	Lineage 2	2.0	341249	341249	341249	341249	341249	17706	17706	1620	155	155	2	2				none	98.35	197.91	97.4911	7534342	673
5	CIP 106224	Murray M306= Sp. 414	1935	1935	Yes	Canada	NA	Canada	America	North America	America	Unknown		NA	S. enterica	Paratyphi B	Present	Not available	aroC(2)	dnaN(14)	hemD(24)	hisD(14)	purE(37)	sucA(19)	thrA(8)	86	Lineage 2	2.0	234061	234061	234061	234061	234061	17706	17706	1620	155	155	2	2				none	98.47	89.27	96.6162	2965448	649
6	52-76	B76-980	1976	1976	Yes	France	NA	France	Europe	Western Europe	Europe	Environment	River water	Normandy	S. enterica	Paratyphi B	Present	1	aroC(2)	dnaN(14)	hemD(24)	hisD(14)	purE(37)	sucA(19)	thrA(8)	86	Lineage 2	2.0	289307	289307	289307	289307	261552	17706	17706	1620	155	155	2	2				none	98.93	222.66	97.7566	7420286	654
7	167-76	B76-1812	1976	1976	Yes	France	NA	France	Europe	Western Europe	Europe	Environment	River water	Normandy	S. enterica	Paratyphi B	Present	Non typable	aroC(2)	dnaN(14)	hemD(24)	hisD(14)	purE(37)	sucA(19)	thrA(8)	86	Lineage 2	2.0	289318	289318	289318	289318	261552	17706	17706	1620	155	155	2	2	Susceptible			none	98.9	129.82	96.9694	4454820	672
8	37-73	B73-564	1973	1973	Yes	France	NA	France	Europe	Western Europe	Europe	Human	Bile	NA	S. enterica	Paratyphi B	Present	1	aroC(2)	dnaN(14)	hemD(24)	hisD(14)	purE(37)	sucA(19)	thrA(8)	86	Lineage 2	2.0	261548	261548	261548	261548	261548	17706	17706	1620	155	155	2	2	Susceptible			none	98.91	99.23	97.1309	3447758	657
9	102-66	B66-1201	1966	1966	Yes	France	NA	France	Europe	Western Europe	Europe	Animal	Clams	NA	S. enterica	Paratyphi B	Present	1	aroC(2)	dnaN(14)	hemD(24)	hisD(14)	purE(37)	sucA(19)	thrA(8)	86	Lineage 2	2.0	261554	261554	261554	261552	261552	17706	17706	1620	155	155	2	2	Susceptible			none	98.88	74.62	97.9748	2579012	648
10	18-67	B67-193	1967	1967	Yes	France	NA	France	Europe	Western Europe	Europe	Human	Blood	NA	S. enterica	Paratyphi B	Present	1	aroC(2)	dnaN(14)	hemD(24)	hisD(14)	purE(37)	sucA(19)	thrA(8)	86	Lineage 2	2.0	261552	261552	261552	261552	261552	17706	17706	1620	155	155	2	2	Susceptible			none	98.9	209.94	98.2542	6980576	663
11	22-73	B73-538	1973	1973	Yes	France	NA	France	Europe	Western Europe	Europe	Environment	River water	NA	S. enterica	Paratyphi B	Present	1	aroC(2)	dnaN(14)	hemD(24)	hisD(14)	purE(37)	sucA(19)	thrA(8)	86	Lineage 2	2.1	261566	261566	261566	261566	261566	17706	17706	1620	155	155	2	2	Susceptible			none	98.9	108.58	98.3191	3674400	666
12	ATCC 10719	AMC 41-H-6	before 1940	1939		United States	NA	United States	America	North America	America	Unknown		NA	S. enterica	Paratyphi B	Present	Not available	aroC(2)	dnaN(14)	hemD(24)	hisD(14)	purE(37)	sucA(19)	thrA(8)	86	Lineage 2	2.1																none	98.8	20.27	97.0205	252558	619
13	CIP 54.103	B53-1852	1953	1953	Yes	Austria	NA	Austria	Europe	Western Europe	Europe	Unknown		NA	S. enterica	Paratyphi B	Present	1	aroC(2)	dnaN(14)	hemD(24)	hisD(14)	purE(37)	sucA(19)	thrA(8)	86	Lineage 2	2.1	234055	234055	234055	234055	234055	17706	17706	1620	155	155	2	2				none	98.85	80.09	96.7167	2670386	665
14	SH15G2070		2015	2015	Yes	China	No travel	China	Asia	Eastern Asia	Asia	Human	Stools	NA	S. enterica	Paratyphi B	Present	Not available	aroC(2)	dnaN(14)	hemD(24)	hisD(14)	purE(37)	sucA(19)	thrA(8)	86	Lineage 2	2.1	301036	301036	301036	301036	301036	17706	17706	1620	155	155	2	2				none	98.94	377.78	98.777	12641856	696
15	493366		2018	2018		United Kingdom	Unknown	UK or elsewhere	Unknown	Unknown	Unknown	Human	Stools	NA	S. enterica	Paratyphi B	Present	Not available	aroC(2)	dnaN(14)	hemD(24)	hisD(14)	purE(37)	sucA(19)	thrA(8)	86	Lineage 2	2.1	168664	168664	168664	168664	168664	168664	17706	1620	155	155	2	2				none	99.27	83.67	97.4015	4008506	1385
16	SMG-20-979		1990	1990	Yes	United Kingdom	Spain	Spain	Europe	Southern Europe	Europe	Human	Pus	NA	S. enterica	Paratyphi B	Present	Not available	aroC(2)	dnaN(14)	hemD(24)	hisD(14)	purE(37)	sucA(19)	thrA(8)	86	Lineage 2	2.1	234069	234069	234069	234069	17706	17706	17706	1620	155	155	2	2				none	98.92	101.05	97.8262	1923274	656
17	SMG-20-968		1989	1989	Yes	United Kingdom	Egypt	Egypt	Africa	Northern Africa	Middle East	Human	Blood	NA	S. enterica	Paratyphi B	Present	Dundee	aroC(2)	dnaN(14)	hemD(24)	hisD(14)	purE(37)	sucA(19)	thrA(8)	86	Lineage 2	2.1	234069	234069	234069	234069	17706	17706	17706	1620	155	155	2	2				none	98.9	69.14	98.4724	1250458	652
18	SL210010		1977	1977		Japan (Toyama)	NA	Japan	Asia	Eastern Asia	Asia	Environment	Unknown	NA	S. enterica	Paratyphi B	Present	Not available	aroC(2)	dnaN(14)	hemD(24)	hisD(14)	purE(37)	sucA(19)	thrA(8)	86	Lineage 2	2.1	263739	263739	263739	263739	17706	17706	17706	1620	155	155	2	2				none	98.84	70.3	98.8379	1681476	544
19	SH16G3159		2015	2015	Yes	China	No travel	China	Asia	Eastern Asia	Asia	Human	Stools	NA	S. enterica	Paratyphi B	Present	Not available	aroC(2)	dnaN(14)	hemD(24)	hisD(14)	purE(37)	sucA(19)	thrA(8)	86	Lineage 2	2.1	282023	282023	282023	282023	17706	17706	17706	1620	155	155	2	2				none	99.02	285.84	97.6875	9619420	633
20	B309		1941	1941	Yes	United Kingdom	NA	United Kingdom	Europe	Northern Europe	Europe	Unknown		NA	S. enterica	Paratyphi B	Present	1	aroC(2)	dnaN(14)	hemD(24)	hisD(14)	purE(37)	sucA(19)	thrA(8)	86	Lineage 2	2.1	341914	341914	341914	341914	17706	17706	17706	1620	155	155	2	2	Susceptible			none	98.94	163.48	97.8485	5469322	649
21	2-57	B56-2185	1956	1956	Yes	Germany	NA	Germany	Europe	Western Europe	Europe	Human	Bile	NA	S. enterica	Paratyphi B	Present	Not available	aroC(2)	dnaN(14)	hemD(24)	hisD(14)	purE(37)	sucA(19)	thrA(8)	86	Lineage 2	2.1	341180	341180	341180	341180	17706	17706	17706	1620	155	155	2	2				none	99.07	176.53	97.8261	6761110	687
22	524183		2018	2018	Yes	United Kingdom	No travel	United Kingdom	Europe	Northern Europe	Europe	Human	Stools	NA	S. enterica	Paratyphi B	Present	Not available	aroC(2)	dnaN(14)	hemD(24)	hisD(14)	purE(37)	sucA(19)	thrA(8)	86	Lineage 2	2.1	131992	123728	123728	29151	17706	17706	17706	1620	155	155	2	2				none	98.92	42.19	97.9193	2014988	646
23	416382		2017	2017	Yes	United Kingdom	No travel	United Kingdom	Europe	Northern Europe	Europe	Human	Unknown	NA	S. enterica	Paratyphi B	Present	Not available	aroC(2)	dnaN(14)	hemD(24)	hisD(14)	purE(37)	sucA(19)	thrA(8)	86	Lineage 2	2.1	123728	123728	123728	29151	17706	17706	17706	1620	155	155	2	2				none	98.92	57.2	98.3246	2724828	671
24	SH11G0446		2011	2011	Yes	China	No travel	China	Asia	Eastern Asia	Asia	Human	Stools	NA	S. enterica	Paratyphi B	Present	Not available	aroC(2)	dnaN(14)	hemD(24)	hisD(14)	purE(37)	sucA(19)	thrA(8)	86	Lineage 2	2.1	301039	301039	301039	301039	17706	17706	17706	1620	155	155	2	2				gyrA_S83F	98.94	198.36	98.039	6724316	675
25	CIP 54.100	B-300	1941	1941	Yes	United Kingdom	NA	United Kingdom	Europe	Northern Europe	Europe	Human	Unknown	NA	S. enterica	Paratyphi B	Present	2	aroC(2)	dnaN(14)	hemD(24)	hisD(14)	purE(37)	sucA(19)	thrA(8)	86	Lineage 2	2.1	41269	41269	41269	17706	17706	17706	17706	1620	155	155	2	2	Susceptible			none	98.97	99.36	96.2096	5365614	663
26	B73-1117		1973	1973	Yes	France	NA	France	Europe	Western Europe	Europe	Human	Stools	NA	S. enterica	Paratyphi B	Present	1	aroC(2)	dnaN(14)	hemD(24)	hisD(14)	purE(37)	sucA(19)	thrA(8)	86	Lineage 2	2.1	341899	341899	341899	341899	341899	17706	17706	1620	155	155	2	2	AMP STR CHL SUL TET			blaTEM-1D, strAB, aadA1, aadA2b, sul1, cmlA1, tetA	98.91	129.58	91.2197	4816614	667
27	B76		1940	1940	Yes	United Kingdom	NA	United Kingdom	Europe	Northern Europe	Europe	Unknown		NA	S. enterica	Paratyphi B	Present	1	aroC(2)	dnaN(14)	hemD(24)	hisD(14)	purE(37)	sucA(19)	thrA(8)	86	Lineage 2	2.1	341905	341905	341905	341905	17706	17706	17706	1620	155	155	2	2	Susceptible			none	98.93	147.98	97.9989	5131520	649
28	72-66	B66-1022	1966	1966	Yes	France	NA	France	Europe	Western Europe	Europe	Human	Blood	NA	S. enterica	Paratyphi B	Present	1	aroC(2)	dnaN(14)	hemD(24)	hisD(14)	purE(37)	sucA(19)	thrA(8)	86	Lineage 2	2.1	341230	341230	341230	341230	17706	17706	17706	1620	155	155	2	2				none	99.06	124.04	97.569	5565442	681
29	76-2469		1976	1976	Yes	United States (District of Columbia)	NA	United States of America	America	North America	America	Human	Stools	NA	S. enterica	Paratyphi B	Present	Not available	aroC(2)	dnaN(14)	hemD(24)	hisD(14)	purE(37)	sucA(19)	thrA(8)	86	Lineage 2	2.1	277448	277448	277448	27562	27562	17706	17706	1620	155	155	2	2	Susceptible			none	98.9	147.26	97.5531	4947054	659
30	200107858		2001	2001	Yes	France	Turkey	Turkey	Asia	Western Asia	Middle East	Human	Stools	NA	S. enterica	Paratyphi B	Present	1	aroC(2)	dnaN(14)	hemD(24)	hisD(14)	purE(37)	sucA(19)	thrA(8)	86	Lineage 2	2.1.1_Turkey1	261558	261558	261558	27562	27562	17706	17706	1620	155	155	2	2	Susceptible			none	98.86	96.6	98.1966	3298034	671
31	06-6420		2006	2006	Yes	France	Turkey	Turkey	Asia	Western Asia	Middle East	Human	Blood	NA	S. enterica	Paratyphi B	Present	Not available	aroC(2)	dnaN(14)	hemD(24)	hisD(14)	purE(37)	sucA(19)	thrA(8)	86	Lineage 2	2.1.1_Turkey1	41271	41271	27562	27562	27562	17706	17706	1620	155	155	2	2	Susceptible			none	98.92	97.19	97.4123	4975676	687
32	41977		2014	2014	Yes	United Kingdom	No travel	United Kingdom	Europe	Northern Europe	Europe	Human	Stools	NA	S. enterica	Paratyphi B	Present	RDNC	aroC(2)	dnaN(14)	hemD(24)	hisD(14)	purE(37)	sucA(19)	thrA(8)	86	Lineage 2	2.1.1_Turkey1	27562	27562	27562	27562	27562	17706	17706	1620	155	155	2	2				gyrA_D87Y	98.39	46.65	98.3077	2368808	679
33	1125478		2004	2004	Yes	United Kingdom	Unknown	UK or elsewhere	Unknown	Unknown	Unknown	Human	Blood	NA	S. enterica	Paratyphi B	Present	1	aroC(2)	dnaN(14)	hemD(24)	hisD(14)	purE(37)	sucA(19)	thrA(8)	86	Lineage 2	2.1.1_Turkey1	262000	32227	27562	27562	27562	17706	17706	1620	155	155	2	2				gyrA_D87Y	98.91	98.67	98.0363	4504250	625
34	H093680197		2009	2009	Yes	United Kingdom	Turkey	Turkey	Asia	Western Asia	Middle East	Human	Blood	NA	S. enterica	Paratyphi B	Present	Dundee	aroC(2)	dnaN(14)	hemD(24)	hisD(14)	purE(37)	sucA(19)	thrA(8)	86	Lineage 2	2.1.1_Turkey1	32227	32227	27562	27562	27562	17706	17706	1620	155	155	2	2				gyrA_D87Y	99.94	148.14	96.6775	7384422	665
35	SH14SF018		2014	2014	Yes	China	NA	China	Asia	Eastern Asia	Asia	Animal	Freshwater snail	NA	S. enterica	Paratyphi B	Present	Not available	aroC(2)	dnaN(14)	hemD(24)	hisD(14)	purE(37)	sucA(19)	thrA(8)	86	Lineage 3	3	301037	301037	301037	301037	301037	301037	301037	1620	155	155	2	2				gyrA_D82N	99.06	227.65	96.3968	8127736	664
36	CIP A214	Conradi strain	1898	1898	Yes	Germany	NA	Germany	Europe	Western Europe	Europe	Unknown		NA	S. enterica	Paratyphi B (monophasic)	Present	Not available	aroC(2)	dnaN(14)	hemD(24)	hisD(14)	purE(37)	sucA(19)	thrA(8)	86	Lineage 4	4	41270	41270	41270	41270	41270	41270	12575	1620	155	155	2	2	Susceptible			none	99.83	104.32	99.2599	5442130	465
37	1190=221K+222K		1938	1938	Yes	Sweden	NA	Sweden	Europe	Northern Europe	Europe	Animal	Dog	NA	S. enterica	Paratyphi B (monophasic)	Present	Not available	aroC(2)	dnaN(14)	hemD(24)	hisD(14)	purE(37)	sucA(19)	thrA(8)	86	Lineage 4	4	37816	37816	37816	37816	37816	12575	12575	1620	155	155	2	2	Susceptible			none	98.85	94.69	99.1686	4789640	457
38	138-75	B75-1122	1975	1975	Yes	Spain	NA	Spain	Europe	Southern Europe	Europe	Human	Stools	NA	S. enterica	Paratyphi B	Present	3a	aroC(2)	dnaN(14)	hemD(24)	hisD(14)	purE(37)	sucA(19)	thrA(8)	86	Lineage 4	4	341245	341245	341245	341245	341245	12575	12575	1620	155	155	2	2				none	99.16	80.43	95.756	3698706	484
39	MS160191		2016	2016	Yes	Ireland	No travel	Ireland	Europe	Northern Europe	Europe	Human	Blood	NA	S. enterica	Paratyphi B	Present	Not available	aroC(2)	dnaN(14)	hemD(24)	hisD(14)	purE(37)	sucA(19)	thrA(8)	86	Lineage 4	4	62781	62781	62781	62781	62781	62781	12575	1620	155	155	2	2				none	98.77	64.85	97.9373	3103162	471
40	NCTC 20180	M99	1932	1932	Yes	Canada	NA	Canada	America	North America	America	Unknown		NA	S. enterica	Paratyphi B (monophasic)	Present	Not available	aroC(2)	dnaN(14)	hemD(24)	hisD(14)	purE(37)	sucA(19)	thrA(8)	86	Lineage 4	4	12575	12575	12575	12575	12575	12575	12575	1620	155	155	2	2				none	98.87	82.3	98.5275	4028088	453
41	28-67	B67-551	1967	1967	Yes	France	NA	France	Europe	Western Europe	Europe	Human	Stools	NA	S. enterica	Paratyphi B	Present	Not available	aroC(2)	dnaN(14)	hemD(24)	hisD(14)	purE(37)	sucA(19)	thrA(8)	86	Lineage 11	11	341224	341224	341224	341224	341224	41273	1620	1620	155	155	2	2				none	99.13	208.38	96.4354	8096506	246
42	SL210015		1978	1978	Yes	Japan	NA	Japan	Asia	Eastern Asia	Asia	Human	Unknown	NA	S. enterica	Paratyphi B	Present	Not available	aroC(2)	dnaN(14)	hemD(24)	hisD(14)	purE(37)	sucA(19)	thrA(8)	86	Lineage 5	5	263737	263737	263737	263680	263680	263680	1620	1620	155	155	2	2				none	99.79	59.04	98.0769	1429160	262
43	SL210004		1972	1972	Yes	Japan (Toyama)	NA	Japan	Asia	Eastern Asia	Asia	Environment	Unknown	NA	S. enterica	Paratyphi B	Present	Not available	aroC(2)	dnaN(14)	hemD(24)	hisD(14)	purE(37)	sucA(19)	thrA(8)	86	Lineage 5	5	263680	263680	263680	263680	263680	263680	1620	1620	155	155	2	2				none	99.79	55.16	98.0462	1353484	266
44	SL210002		1971	1971	Yes	Japan (Toyama)	NA	Japan	Asia	Eastern Asia	Asia	Environment	Unknown	NA	S. enterica	Paratyphi B	Present	Not available	aroC(2)	dnaN(14)	hemD(24)	hisD(14)	purE(37)	sucA(19)	thrA(8)	86	Lineage 5	5	263681	263681	263681	263680	263680	263680	1620	1620	155	155	2	2				none	99.62	64.56	98.0387	1569796	255
45	SL210028		1980	1980	Yes	Japan (Toyama)	NA	Japan	Asia	Eastern Asia	Asia	Environment	Unknown	NA	S. enterica	Paratyphi B	Present	Not available	aroC(2)	dnaN(14)	hemD(24)	hisD(14)	purE(37)	sucA(19)	thrA(8)	86	Lineage 5	5	263731	263731	263731	263730	263680	263680	1620	1620	155	155	2	2				none	99.8	65.48	98.2157	1587874	268
46	SL210024		1980	1980	Yes	Japan (Toyama)	NA	Japan	Asia	Eastern Asia	Asia	Environment	Unknown	NA	S. enterica	Paratyphi B	Present	Not available	aroC(2)	dnaN(14)	hemD(24)	hisD(14)	purE(37)	sucA(19)	thrA(8)	86	Lineage 5	5	263730	263730	263730	263730	263680	263680	1620	1620	155	155	2	2				none	99.76	58.81	98.0622	1456496	258
47	SPPI_33		1958	1958	Yes	Russian Federation (St-Petersburg region)	NA	Russian Federation	Europe	Eastern Europe	Europe	Human	Unknown	NA	S. enterica	Paratyphi B	Present	Not available	aroC(2)	dnaN(14)	hemD(24)	hisD(14)	purE(37)	sucA(19)	thrA(8)	86	Lineage 5	5	289331	289331	289331	289331	289331	234054	1620	1620	155	155	2	2	Susceptible			none	99.83	115.23	97.4187	3950462	318
48	CIP 106246	Muray M475=Guise	1926	1926	Yes	United Kingdom	NA	United Kingdom	Europe	Northern Europe	Europe	Human	Blood	NA	S. enterica	Paratyphi B	Present	Not available	aroC(2)	dnaN(14)	hemD(24)	hisD(14)	purE(37)	sucA(19)	thrA(8)	86	Lineage 5	5	234054	234054	234054	234054	234054	234054	1620	1620	155	155	2	2				none	99.04	91.02	96.5846	3068602	265
49	116K	WS2454	1935	1935	Yes	Japan	NA	Japan	Asia	Eastern Asia	Asia	Human	unknown	NA	S. enterica	Onarimon (9:b:1,2)	Present	Not available	aroC(2)	dnaN(14)	hemD(24)	hisD(1)	purE(37)	sucA(19)	thrA(8)	6558	Lineage 5	5	191676	191676	191676	191676	191676	191676	1620	1620	155	155	2	2				none	99.48	61.31	97.4636	2012036	571
50	7K	8085, WS0087	1934	1934	Yes	Denmark	NA	Denmark	Europe	Northern Europe	Europe	Unknown		NA	S. enterica	Paratyphi B	Present	3a	aroC(2)	dnaN(14)	hemD(24)	hisD(14)	purE(37)	sucA(19)	thrA(8)	86	Lineage 5	5	256772	256772	256772	256772	256772	256772	1620	1620	155	155	2	2	Susceptible			none	99.64	140.67	98.0945	5047812	265
51	748852		2019	2019	Outlier in Tempest	United Kingdom	No travel	United Kingdom	Europe	Northern Europe	Europe	Human	Stools	NA	S. enterica	Paratyphi B	Present	Not available	aroC(2)	dnaN(14)	hemD(24)	hisD(14)	purE(37)	sucA(19)	thrA(8)	86	Lineage 5	5	184772	184772	184772	184772	184772	184772	184772	1620	155	155	2	2				none	98.76	137.18	97.605	6562004	454
52	SH16G0260		2016	2016	Yes	China	No travel	China	Asia	Eastern Asia	Asia	Human	Stools	NA	S. enterica	Paratyphi B	Present	Not available	aroC(2)	dnaN(14)	hemD(24)	hisD(14)	purE(37)	sucA(19)	thrA(8)	86	Lineage 5	5	301034	301034	301034	301034	301034	234054	1620	1620	155	155	2	2				gyrA_S83F	99.09	157.53	97.3835	5412908	282
53	SH16SF1222		2016	2016	Yes	China	NA	China	Asia	Eastern Asia	Asia	Animal	Shrimp	NA	S. enterica	Paratyphi B	Present	Not available	aroC(2)	dnaN(14)	hemD(24)	hisD(14)	purE(37)	sucA(19)	thrA(8)	86	Lineage 5	5	301034	301034	301034	301034	301034	234054	1620	1620	155	155	2	2				gyrA_S83F	99.08	251.55	97.8566	8437914	285
54	17-87	B87-354	1987	1987	Yes	France	NA	France	Europe	Western Europe	Europe	Animal	Mussels	NA	S. enterica	Paratyphi B	Present	3aI	aroC(2)	dnaN(14)	hemD(24)	hisD(14)	purE(37)	sucA(19)	thrA(8)	86	Lineage 6	6	261551	261551	261551	261551	261551	261551	1620	1620	155	155	2	2	Susceptible			none	99.26	105.1	97.4563	3576322	287
55	B624		1941	1941	Yes	United Kingdom	NA	United Kingdom	Europe	Northern Europe	Europe	Unknown		NA	S. enterica	Paratyphi B	Present	3aI	aroC(2)	dnaN(14)	hemD(24)	hisD(14)	purE(37)	sucA(19)	thrA(8)	86	Lineage 6	6	341896	341896	341896	341896	341896	12577	1620	1620	155	155	2	2	Susceptible			none	99.95	154.08	97.3537	5213124	251
56	77-1018		1977	1977	Yes	United States (Washington)	NA	United States of America	America	North America	America	Human	Stools	NA	S. enterica	Paratyphi B	Present	Not available	aroC(2)	dnaN(14)	hemD(24)	hisD(14)	purE(37)	sucA(19)	thrA(8)	86	Lineage 6	6	277449	277449	277449	277449	277449	12577	1620	1620	155	155	2	2	Susceptible			none	99.9	125.71	98.2744	4269600	255
57	CIP 106229	Murray M352=Lepine H 1911 strain II	1943	1943	Yes	Canada	NA	Canada	America	North America	America	Unknown		NA	S. enterica	Paratyphi B	Present	Not available	aroC(2)	dnaN(14)	hemD(24)	hisD(14)	purE(37)	sucA(19)	thrA(8)	86	Lineage 6	6	234058	234058	234058	12577	12577	12577	1620	1620	155	155	2	2				none	99.71	67.72	96.1423	2303530	244
58	NCTC 20182	M105	1943	1943	Yes	Canada	NA	Canada	America	North America	America	Human	Stools	NA	S. enterica	Paratyphi B	Present	Not available	aroC(2)	dnaN(14)	hemD(24)	hisD(14)	purE(37)	sucA(19)	thrA(8)	86	Lineage 6	6	12577	12577	12577	12577	12577	12577	1620	1620	155	155	2	2				none	99.82	86	97.0663	4286328	245
59	NCTC 20183	M106	1943	1943	Yes	Canada	NA	Canada	America	North America	America	Human	Stools	NA	S. enterica	Paratyphi B	Present	Not available	aroC(2)	dnaN(14)	hemD(24)	hisD(14)	purE(37)	sucA(19)	thrA(8)	86	Lineage 6	6	12578	12578	12577	12577	12577	12577	1620	1620	155	155	2	2				none	99.81	85.73	97.8687	4231320	234
60	NCTC 20232	M499	1943	1943	Yes	Canada	NA	Canada	America	North America	America	Human	Stools	NA	S. enterica	Paratyphi B	Present	Not available	aroC(2)	dnaN(14)	hemD(24)	hisD(14)	purE(37)	sucA(19)	thrA(8)	86	Lineage 6	6	12612	12612	12577	12577	12577	12577	1620	1620	155	155	2	2				none	99.82	187.54	96.7735	9308942	243
61	CIP 54.105	B53-1688	1953	1953	Yes	Austria	NA	Austria	Europe	Western Europe	Europe	Unknown		NA	S. enterica	Paratyphi B	Present	Beccles	aroC(2)	dnaN(14)	hemD(24)	hisD(14)	purE(37)	sucA(19)	thrA(8)	86	Lineage 7	7.0	234060	234060	234060	234060	234060	234060	1620	1620	155	155	2	2				none	99.78	81.55	97.0539	2759296	253
62	12-80	B80--297	1980	1980		France	NA	France	Europe	Western Europe	Europe	Environment	Superficial water	Seine Maritime	S. enterica	Paratyphi B	Present	Taunton	aroC(2)	dnaN(14)	hemD(1111)	hisD(14)	purE(37)	sucA(19)	thrA(8)	8931	Lineage 7	7.1	289311	289311	289311	289311	289311	32196	1620	1620	155	155	2	2	Susceptible			none	99.69	176.65	96.6275	6164036	258
63	20_PB-J		2010	2010	Yes	Spain	NA	Spain	Europe	Southern Europe	Europe	Human	Stools	NA	S. enterica	Paratyphi B	Present	Not available	aroC(500)	dnaN(464)	hemD(383)	hisD(14)	purE(37)	sucA(19)	thrA(8)	2134	Lineage 7	7.1	32196	32196	32196	32196	32196	32196	1620	1620	155	155	2	2				none	99.94	142.29	98.3144	7385316	250
64	5-63		1963	1963	Yes	Chile	NA	Chile	America	South America	America	Unknown		NA	S. enterica	Paratyphi B	Present	3aI	aroC(2)	dnaN(14)	hemD(24)	hisD(14)	purE(37)	sucA(19)	thrA(8)	86	Lineage 7	7.1.1_Chile1	289297	289297	289297	289297	289297	289297	1620	1620	155	155	2	2	Susceptible			none	99.78	166.01	97.3694	5612896	289
65	DB 7403		1983	1983	Yes	Chile	No travel	Chile	America	South America	America	Human	Unknown	NA	S. enterica	Paratyphi B	Present	Not available	aroC(2)	dnaN(14)	hemD(24)	hisD(14)	purE(37)	sucA(19)	thrA(8)	86	Lineage 7	7.1.1_Chile1	340818	340818	340818	340818	340818	214282	1620	1620	155	155	2	2				none	99.95	156.13	97.384	7886078	255
66	BAS 9		1986	1986	Yes	Chile	No travel	Chile	America	South America	America	Human	Unknown	NA	S. enterica	Paratyphi B	Present	Not available	aroC(2)	dnaN(14)	hemD(24)	hisD(14)	purE(37)	sucA(19)	thrA(8)	86	Lineage 7	7.1.1_Chile1	340817	340817	340817	340817	214282	214282	1620	1620	155	155	2	2				none	99.95	156.96	97.9547	8040734	249
67	6198		1985	1985		Chile	No travel	Chile	America	South America	America	Human	Unknown	NA	S. enterica	Paratyphi B	Present	Not available	aroC(2)	dnaN(14)	hemD(24)	hisD(14)	purE(37)	sucA(19)	thrA(8)	86	Lineage 7	7.1.1_Chile1	340827	340827	340827	340827	214282	214282	1620	1620	155	155	2	2				none	99.94	149.96	98.1362	7671018	255
68	7020		1985	1985		Chile	No travel	Chile	America	South America	America	Human	Unknown	NA	S. enterica	Paratyphi B	Present	Not available	aroC(2)	dnaN(14)	hemD(24)	hisD(14)	purE(37)	sucA(19)	thrA(8)	86	Lineage 7	7.1.1_Chile1	340827	340827	340827	340827	214282	214282	1620	1620	155	155	2	2				none	99.94	146	98.2296	7447606	253
69	CFSAN024725		2012	2012	Yes	Chile	NA	Chile	America	South America	America	Animal	Kelp Gull	NA	S. enterica	Paratyphi B	Present	Not available	aroC(2)	dnaN(14)	hemD(410)	hisD(14)	purE(37)	sucA(19)	thrA(8)	2340	Lineage 7	7.1.1_Chile1	353546	353546	353546	353546	331042	214282	1620	1620	155	155	2	2				none	99.76	42.36	99.1689	1999994	265
70	CMF 6999		1983	1983		Chile	No travel	Chile	America	South America	America	Human	Unknown	NA	S. enterica	Paratyphi B	Present	Not available	aroC(2)	dnaN(14)	hemD(410)	hisD(14)	purE(37)	sucA(19)	thrA(8)	2340	Lineage 7	7.1.1_Chile1	340832	340832	340832	331042	331042	214282	1620	1620	155	155	2	2				none	99.94	165.94	98.5069	8347088	265
71	CLA-76-5		2019	2019		Chile	NA	Chile	America	South America	America	Environment	River water	NA	S. enterica	Paratyphi B	Present	Not available	aroC(2)	dnaN(14)	hemD(24)	hisD(14)	purE(37)	sucA(19)	thrA(8)	86	Lineage 7	7.1.1_Chile1	214282	214282	214282	214282	214282	214282	1620	1620	155	155	2	2				gyrA_S83F, gyrA_D87G	99.94	47.43	98.3076	991176	245
72	RML 7856		1983	1983		Chile	No travel	Chile	America	South America	America	Human	Unknown	NA	S. enterica	Paratyphi B	Present	Not available	aroC(2)	dnaN(14)	hemD(24)	hisD(14)	purE(37)	sucA(19)	thrA(8)	86	Lineage 7	7.1.1_Chile1	340863	340863	340863	340863	214282	214282	1620	1620	155	155	2	2				none	99.95	159.54	97.8272	8054544	244
73	18-88	B88-386	1988	1988	Yes	Chile	NA	Chile	America	South America	America	Human	Blood	NA	S. enterica	Paratyphi B	Present	RDNC	aroC(2)	dnaN(14)	hemD(24)	hisD(14)	purE(37)	sucA(19)	thrA(8)	86	Lineage 7	7.1.1_Chile1	341296	341296	341296	340863	214282	214282	1620	1620	155	155	2	2				none	99.86	119.43	97.4975	4620000	246
74	5644		1985	1985		Chile	No travel	Chile	America	South America	America	Human	Unknown	NA	S. enterica	Paratyphi B	Present	Not available	aroC(2)	dnaN(14)	hemD(24)	hisD(14)	purE(37)	sucA(19)	thrA(8)	86	Lineage 7	7.1.1_Chile1	340842	340842	340842	340842	214282	214282	1620	1620	155	155	2	2				none	99.91	158.71	98.6579	8080938	257
75	MNZ 6203		1983	1983	Yes	Chile	No travel	Chile	America	South America	America	Human	Unknown	NA	S. enterica	Paratyphi B	Present	Not available	aroC(2)	dnaN(14)	hemD(24)	hisD(14)	purE(37)	sucA(19)	thrA(8)	86	Lineage 7	7.1.1_Chile1	340860	340860	340860	340860	214282	214282	1620	1620	155	155	2	2				none	99.14	186.3	98.5406	9203546	258
76	PMP 2097		1984	1984		Chile	No travel	Chile	America	South America	America	Human	Unknown	NA	S. enterica	Paratyphi B	Present	Not available	aroC(2)	dnaN(14)	hemD(24)	hisD(14)	purE(37)	sucA(19)	thrA(8)	86	Lineage 7	7.1.1_Chile1	340870	340870	340870	340870	214282	214282	1620	1620	155	155	2	2				none	99.94	229.54	98.8296	11240700	252
77	4695/84	WS0776	1984	1984	Yes	Chile	NA	Chile	America	South America	America	Unknown		NA	S. enterica	Paratyphi B	Present	Not available	aroC(2)	dnaN(14)	hemD(24)	hisD(14)	purE(37)	sucA(19)	thrA(8)	86	Lineage 7	7.1.1_Chile1	263486	263486	263486	263486	214282	214282	1620	1620	155	155	2	2				none	99.9	173.02	98.7991	5728532	274
78	MATAQ-77-5		2019	2019	Yes	Chile	NA	Chile	America	South America	America	Environment	River water	NA	S. enterica	Paratyphi B	Present	Not available	aroC(2)	dnaN(14)	hemD(24)	hisD(14)	purE(37)	sucA(19)	thrA(8)	86	Lineage 7	7.1.1_Chile1	214283	214283	214283	214283	214282	214282	1620	1620	155	155	2	2				none	99.9	47.99	98.225	1059068	262
79	3K	8006	1937	1937	Yes	Denmark	NA	Denmark	Europe	Northern Europe	Europe	Human probably	Unknown	NA	S. enterica	Paratyphi B	Present	Not available	aroC(2)	dnaN(14)	hemD(24)	hisD(14)	purE(37)	sucA(19)	thrA(8)	86	Lineage 7	7.2_EuropeEasternAsia	41273	41273	41273	41273	41273	41273	1620	1620	155	155	2	2	Susceptible			none	99.05	103.96	98.6054	5352446	209
80	11-70	B70-205	1970	1970	Yes	Turkey	NA	Turkey	Asia	Western Asia	Middle East	Animal	European Ground Squirrel	NA	S. enterica	Paratyphi B	Present	3a	aroC(2)	dnaN(14)	hemD(24)	hisD(14)	purE(37)	sucA(19)	thrA(8)	86	Lineage 7	7.2_EuropeEasternAsia	342240	342240	342240	342240	41273	41273	1620	1620	155	155	2	2				none	99.01	176.11	97.9055	6721042	220
81	SH10G638		2010	2010	Yes	China	No travel	China	Asia	Eastern Asia	Asia	Human	Stools	NA	S. enterica	Paratyphi B	Present	Not available	aroC(2)	dnaN(14)	hemD(24)	hisD(14)	purE(37)	sucA(1272)	thrA(8)	9224	Lineage 7	7.2_EuropeEasternAsia	301040	301040	301040	301040	301040	41273	1620	1620	155	155	2	2				none	99.09	359.27	99.0325	12022944	247
82	B62		1940	1940	Yes	United Kingdom	NA	United Kingdom	Europe	Northern Europe	Europe	Unknown		NA	S. enterica	Paratyphi B	Present	3a	aroC(2)	dnaN(14)	hemD(24)	hisD(14)	purE(37)	sucA(19)	thrA(8)	86	Lineage 7	7.2_EuropeEasternAsia	342092	342092	342092	342092	342092	41273	1620	1620	155	155	2	2	Susceptible			none	99.19	158	98.6766	5231932	230
83	SARA42	DMS 724/74	1974	1974		United Kingdom	NA	United Kingdom	Europe	Northern Europe	Europe	Human	Unknown	NA	S. enterica	Paratyphi B	Present	Not available	aroC(2)	dnaN(14)	hemD(24)	hisD(14)	purE(37)	sucA(19)	thrA(8)	86	Lineage 7	7.2_EuropeEasternAsia	42695	42695	42695	42695	42695	41273	1620	1620	155	155	2	2				none	99.1	129.85	95.3364	7150298	232
84	SL210022		1980	1980		Japan (Toyama)	NA	Japan	Asia	Eastern Asia	Asia	Environment	Unknown	NA	S. enterica	Paratyphi B	Present	Not available	aroC(2)	dnaN(14)	hemD(24)	hisD(14)	purE(37)	sucA(19)	thrA(8)	86	Lineage 7	7.2_EuropeEasternAsia	263734	263734	263734	263734	263734	41273	1620	1620	155	155	2	2				none	99.08	59.73	97.1627	1475284	216
85	B397		1941	1941		United Kingdom	NA	United Kingdom	Europe	Northern Europe	Europe	Unknown		NA	S. enterica	Paratyphi B	Present	Not available	aroC(2)	dnaN(14)	hemD(24)	hisD(14)	purE(37)	sucA(19)	thrA(8)	86	Lineage 7	7.2_EuropeEasternAsia	341887	341887	341887	341887	263678	41273	1620	1620	155	155	2	2				none	99.04	81.62	98.4375	2755778	203
86	B97		1941	1941	Yes	United Kingdom	NA	United Kingdom	Europe	Northern Europe	Europe	Unknown		NA	S. enterica	Paratyphi B	Present	3b	aroC(2)	dnaN(14)	hemD(24)	hisD(14)	purE(37)	sucA(19)	thrA(8)	86	Lineage 7	7.2_EuropeEasternAsia	341890	341890	341890	341887	263678	41273	1620	1620	155	155	2	2	Susceptible			none	99.05	111.7	98.4958	3703616	204
87	SL210005		1972	1972	Yes	Japan (Toyama)	NA	Japan	Asia	Eastern Asia	Asia	Environment	Unknown	NA	S. enterica	Paratyphi B	Present	Not available	aroC(2)	dnaN(14)	hemD(24)	hisD(14)	purE(37)	sucA(19)	thrA(8)	86	Lineage 7	7.2_EuropeEasternAsia	263682	263682	263682	263682	263678	41273	1620	1620	155	155	2	2				none	99.06	58.32	99.694	1384186	193
88	SL210003		1971	1971		Japan (Toyama)	NA	Japan	Asia	Eastern Asia	Asia	Environment	Unknown	NA	S. enterica	Paratyphi B	Present	Not available	aroC(2)	dnaN(14)	hemD(24)	hisD(14)	purE(37)	sucA(19)	thrA(8)	86	Lineage 7	7.2_EuropeEasternAsia	263683	263683	263683	263683	263678	41273	1620	1620	155	155	2	2				none	99.05	56.44	98.8464	1341064	214
89	SL210006		1972	1972		Japan (Toyama)	NA	Japan	Asia	Eastern Asia	Asia	Environment	Unknown	NA	S. enterica	Paratyphi B	Present	Not available	aroC(2)	dnaN(14)	hemD(24)	hisD(14)	purE(37)	sucA(19)	thrA(8)	86	Lineage 7	7.2_EuropeEasternAsia	263740	263740	263740	263740	263678	41273	1620	1620	155	155	2	2				none	99.03	65.54	98.8741	1596002	213
90	SL210011		1978	1978	Yes	Japan (Toyama)	NA	Japan	Asia	Eastern Asia	Asia	Environment	Unknown	NA	S. enterica	Paratyphi B	Present	Not available	aroC(2)	dnaN(14)	hemD(24)	hisD(14)	purE(37)	sucA(19)	thrA(8)	86	Lineage 7	7.2_EuropeEasternAsia	263742	263742	263678	263678	263678	41273	1620	1620	155	155	2	2				none	99.08	67.17	98.9035	1610274	214
91	SL210013		1978	1978		Japan (Toyama)	NA	Japan	Asia	Eastern Asia	Asia	Environment	Unknown	NA	S. enterica	Paratyphi B	Present	Not available	aroC(2)	dnaN(14)	hemD(24)	hisD(14)	purE(37)	sucA(19)	thrA(8)	86	Lineage 7	7.2_EuropeEasternAsia	263678	263678	263678	263678	263678	41273	1620	1620	155	155	2	2				none	99.07	63.75	97.3542	1548550	207
92	SL210014		1978	1978		Japan (Toyama)	NA	Japan	Asia	Eastern Asia	Asia	Environment	Unknown	NA	S. enterica	Paratyphi B	Present	Not available	aroC(2)	dnaN(14)	hemD(24)	hisD(14)	purE(37)	sucA(19)	thrA(8)	86	Lineage 7	7.2_EuropeEasternAsia	263738	263738	263678	263678	263678	41273	1620	1620	155	155	2	2				none	99	63.16	96.3097	1560902	215
93	SL210009		1977	1977		Japan (Toyama)	NA	Japan	Asia	Eastern Asia	Asia	Environment	Unknown	NA	S. enterica	Paratyphi B	Present	Not available	aroC(2)	dnaN(14)	hemD(24)	hisD(14)	purE(37)	sucA(19)	thrA(8)	86	Lineage 7	7.2_EuropeEasternAsia	263741	263678	263678	263678	263678	41273	1620	1620	155	155	2	2				none	99.09	57.99	98.8693	1393960	205
94	SL210023		1980	1980		Japan (Toyama)	NA	Japan	Asia	Eastern Asia	Asia	Environment	Unknown	NA	S. enterica	Paratyphi B	Present	Not available	aroC(2)	dnaN(14)	hemD(24)	hisD(14)	purE(37)	sucA(19)	thrA(8)	86	Lineage 7	7.2_EuropeEasternAsia	263732	263732	263732	263732	263732	263732	1620	1620	155	155	2	2				none	99.03	63.62	98.9672	1522862	325
95	SL210021		1979	1979		Japan	NA	Japan	Asia	Eastern Asia	Asia	Human	Unknown	NA	S. enterica	Paratyphi B	Present	Not available	aroC(2)	dnaN(14)	hemD(24)	hisD(14)	purE(37)	sucA(19)	thrA(8)	86	Lineage 7	7.2_EuropeEasternAsia	263679	263679	263679	263678	263678	41273	1620	1620	155	155	2	2				none	98.92	64.54	97.3131	1557122	210
96	SL210019		1979	1979	Outlier in Tempest	Japan	NA	Japan	Asia	Eastern Asia	Asia	Human	Unknown	NA	S. enterica	Paratyphi B	Present	Not available	aroC(2)	dnaN(14)	hemD(24)	hisD(14)	purE(37)	sucA(19)	thrA(8)	86	Lineage 7	7.2_EuropeEasternAsia	263735	263735	263735	263735	263735	263733	1620	1620	155	155	2	2				none	99.04	65.77	98.9224	1566384	418
97	SL210020		1979	1979	Yes	Japan	NA	Japan	Asia	Eastern Asia	Asia	Human	Unknown	NA	S. enterica	Paratyphi B	Present	Not available	aroC(2)	dnaN(14)	hemD(24)	hisD(14)	purE(37)	sucA(19)	thrA(8)	86	Lineage 7	7.2_EuropeEasternAsia	263733	263733	263733	263733	263733	263733	1620	1620	155	155	2	2				none	99.09	65.77	98.9852	1576084	376
98	NCTC 20176	M87, Lowestoft	1923	1923	Yes	United Kingdom (England)	NA	United Kingdom	Europe	Northern Europe	Europe	Unknown		NA	S. enterica	Paratyphi B	Present	Not available	aroC(2)	dnaN(14)	hemD(24)	hisD(14)	purE(37)	sucA(19)	thrA(8)	86	Lineage 7	7.3	12574	12574	12574	12574	12574	12574	1620	1620	155	155	2	2				none	99.81	89.71	98.6406	4378942	226
99	73-1900		1973	1973	Yes	United States (Ohio)	NA	United States of America	America	North America	America	Human	Stools	NA	S. enterica	Paratyphi B (monophasic)	Present	Not available	aroC(2)	dnaN(14)	hemD(24)	hisD(14)	purE(37)	sucA(19)	thrA(8)	86	Lineage 7	7.3	277459	277459	277459	277459	277459	277459	1620	1620	155	155	2	2	Susceptible			none	99.58	127.61	99.0764	4292852	296
100	69-0480		1969	1969		United States (New Mexico)	NA	Unknown	America	North America	America	Human	Gallbladder	NA	S. enterica	Paratyphi B (monophasic)	Present	Not available	aroC(2)	dnaN(14)	hemD(24)	hisD(14)	purE(37)	sucA(19)	thrA(8)	86	Lineage 7	7.3	277466	277466	277466	277466	277466	277459	1620	1620	155	155	2	2	Susceptible			none	99.59	179.68	99.3295	5939484	324
101	30-62	B62-918	1962	1962	Yes	France	NA	France	Europe	Western Europe	Europe	Human	Cerebrospinal fluid	NA	S. enterica	Paratyphi B	Present	3b	aroC(2)	dnaN(14)	hemD(24)	hisD(14)	purE(37)	sucA(1186)	thrA(8)	8505	Lineage 7	7.3	261565	261565	261565	261565	261565	4708	1620	1620	155	155	2	2	Susceptible			none	99.06	102.38	97.8355	3469560	217
102	NCTC 20196	M153, Rowlands (vaccine strain RAMC)	1915	1915	Yes	France	NA	France	Europe	Western Europe	Europe	Unknown		NA	S. enterica	Paratyphi B	Present	Not available	aroC(2)	dnaN(14)	hemD(24)	hisD(14)	purE(37)	sucA(19)	thrA(8)	86	Lineage 7	7.3	12580	12580	12580	12580	12580	4708	1620	1620	155	155	2	2				none	98.92	72.36	97.3684	3556250	210
103	77-0106		1977	1977		United States (Arizona)	NA	United States of America	America	North America	America	Human	Stools	NA	S. enterica	Paratyphi B (monophasic)	Present	Not available	aroC(2)	dnaN(14)	hemD(24)	hisD(14)	purE(37)	sucA(19)	thrA(8)	86	Lineage 7	7.3	277450	277450	277450	277450	277450	4708	1620	1620	155	155	2	2	Susceptible	12	0.047	none	100	177.32	99.7033	5849406	124
104	6-58	B58-1711	1958	1958		France	NA	France	Europe	Western Europe	Europe	Human	Stools	NA	S. enterica	Paratyphi B (monophasic)	Present	Beccles	aroC(2)	dnaN(14)	hemD(24)	hisD(14)	purE(37)	sucA(19)	thrA(8)	86	Lineage 7	7.3	290789	290789	290789	290789	37832	4708	1620	1620	155	155	2	2	Susceptible			none	99.99	349.84	98.8199	11813844	43
105	2-58bis		1958	1958	Yes	The Netherlands	NA	The Netherlands	Europe	Western Europe	Europe	Human	Blood	NA	S. enterica	Paratyphi B (monophasic)	Present	Jersey	aroC(2)	dnaN(14)	hemD(24)	hisD(14)	purE(37)	sucA(19)	thrA(8)	86	Lineage 7	7.3	261550	261550	261550	261550	37832	4708	1620	1620	155	155	2	2	Susceptible			none	99.99	156.74	99.7238	5184436	45
106	4-58	B58-855	1958	1958		France	NA	France	Europe	Western Europe	Europe	Human	Stools	NA	S. enterica	Paratyphi B (monophasic)	Present	Jersey	aroC(2)	dnaN(14)	hemD(24)	hisD(14)	purE(37)	sucA(19)	thrA(8)	86	Lineage 7	7.3	290787	290787	290787	290787	290787	4708	1620	1620	155	155	2	2	Susceptible			none	99.98	130.76	99.1775	4469284	136
107	B91-91		1991	1991		France	No travel	France	Europe	Western Europe	Europe	Human	Blood	NA	S. enterica	Paratyphi B (monophasic)	Present	Jersey	aroC(2)	dnaN(14)	hemD(24)	hisD(14)	purE(37)	sucA(19)	thrA(8)	86	Lineage 7	7.3	261590	261590	261590	261590	261590	4708	1620	1620	155	155	2	2	Susceptible			none	99.96	130.35	99.4614	4433274	72
108	B72-1189		1972	1972		France	NA	France	Europe	Western Europe	Europe	Human	Unknown	NA	S. enterica	Paratyphi B (monophasic)	Present	Beccles	aroC(2)	dnaN(14)	hemD(24)	hisD(14)	purE(37)	sucA(19)	thrA(8)	86	Lineage 7	7.3	341888	341888	341888	341888	37832	4708	1620	1620	155	155	2	2	Susceptible			none	99.67	82.7	96.4156	2861798	59
109	346K		1951	1951		Denmark	NA	Denmark	Europe	Northern Europe	Europe	Unknown		NA	S. enterica	Paratyphi B (monophasic)	Present	Not available	aroC(2)	dnaN(14)	hemD(24)	hisD(14)	purE(37)	sucA(19)	thrA(8)	86	Lineage 7	7.3	41264	41264	41264	41264	41264	4708	1620	1620	155	155	2	2	Susceptible			none	99.99	98.04	99.5634	5206264	107
110	248K		1947	1947		Denmark	NA	Denmark	Europe	Northern Europe	Europe	Unknown		NA	S. enterica	Paratyphi B (monophasic)	Present	Not available	aroC(2)	dnaN(14)	hemD(24)	hisD(14)	purE(37)	sucA(19)	thrA(8)	86	Lineage 7	7.3	41272	41272	41272	41272	41272	4708	1620	1620	155	155	2	2	Susceptible			none	99.98	108.08	99.572	5523742	105
111	B66-1071		1966	1966	Yes	France	NA	France	Europe	Western Europe	Europe	Human	Blood	NA	S. enterica	Paratyphi B (monophasic)	Present	Jersey	aroC(2)	dnaN(14)	hemD(24)	hisD(14)	purE(37)	sucA(19)	thrA(8)	86	Lineage 7	7.3	341902	341902	341902	341902	37832	4708	1620	1620	155	155	2	2	Susceptible			none	99.99	144.76	99.6688	4947394	60
112	B66-545		1966	1966		Belgium	NA	Belgium	Europe	Western Europe	Europe	Unknown		NA	S. enterica	Paratyphi B (monophasic)	Present	Not available	aroC(2)	dnaN(14)	hemD(24)	hisD(14)	purE(37)	sucA(19)	thrA(8)	86	Lineage 7	7.3	341885	341885	341885	341885	37832	4708	1620	1620	155	155	2	2				none	99.89	70.56	99.6666	2354790	45
113	B1727		1944	1944	Yes	United Kingdom	NA	United Kingdom	Europe	Northern Europe	Europe	Unknown		NA	S. enterica	Paratyphi B (monophasic)	Present	Beccles	aroC(2)	dnaN(14)	hemD(24)	hisD(14)	purE(37)	sucA(19)	thrA(8)	86	Lineage 7	7.3	342091	342091	342091	342091	37832	4708	1620	1620	155	155	2	2	Susceptible			none	100	192.21	97.8762	6475280	34
114	B4182		1950	1950		United Kingdom	NA	Jersey	Europe	Northern Europe	Europe	Unknown		NA	S. enterica	Paratyphi B (monophasic)	Present	Jersey	aroC(2)	dnaN(14)	hemD(24)	hisD(14)	purE(37)	sucA(19)	thrA(8)	86	Lineage 7	7.3	341901	341901	341901	341901	37832	4708	1620	1620	155	155	2	2	Susceptible			none	99.88	171.42	99.6706	5648248	41
115	CIP 54.115		1953	1953		France	NA	France	Europe	Western Europe	Europe	Human	Blood	NA	S. enterica	Paratyphi B (monophasic)	Present	Jersey	aroC(2)	dnaN(14)	hemD(24)	hisD(14)	purE(37)	sucA(19)	thrA(8)	86	Lineage 7	7.3	37832	37832	37832	37832	37832	4708	1620	1620	155	155	2	2	Susceptible			none	100	107.33	99.5201	5208166	0
116	202000832		2020	2020		France	Canada	Canada	America	North America	America	Human	Blood	NA	S. enterica	Paratyphi B (monophasic)	Present	Not available	aroC(2)	dnaN(14)	hemD(24)	hisD(14)	purE(37)	sucA(19)	thrA(8)	86	Lineage 7	7.3	342086	342086	342086	342086	37832	4708	1620	1620	155	155	2	2	NAL	≥ 256	0.047	gyrA_D87N	99.13	98.32	99.5998	3251534	72
117	202002228		2020	2020	Yes	France	No travel	France	Europe	Western Europe	Europe	Human	Stools	NA	S. enterica	Paratyphi B (monophasic)	Present	Not available	aroC(2)	dnaN(14)	hemD(24)	hisD(14)	purE(37)	sucA(19)	thrA(8)	86	Lineage 7	7.3	256894	256894	256894	256894	37832	4708	1620	1620	155	155	2	2	Susceptible	8	0.023	none	99.99	324.37	99.3465	10692786	69
118	34-62	B62-970	1962	1962	Yes	France	NA	France	Europe	Western Europe	Europe	Environment	River water	NA	S. enterica	Paratyphi B (monophasic)	Present	Beccles	aroC(2)	dnaN(14)	hemD(24)	hisD(14)	purE(37)	sucA(19)	thrA(8)	86	Lineage 7	7.3	261553	261553	261553	261553	37832	4708	1620	1620	155	155	2	2	Susceptible			none	99.98	115.96	99.1015	3914880	51
119	95-66	B66-1193	1966	1966		Algeria	NA	Algeria	Africa	Northern Africa	Africa	Animal	Dog	NA	S. enterica	Paratyphi B	Present	Beccles	aroC(2)	dnaN(14)	hemD(24)	hisD(14)	purE(37)	sucA(19)	thrA(8)	86	Lineage 7	7.3.1_NorthAfrica1	341217	341217	341217	341217	4708	4708	1620	1620	155	155	2	2				none	99.65	135.94	97.9578	5224186	440
120	7-67	B67-108	1967	1967	Yes	France	NA	France	Europe	Western Europe	Europe	Animal	Hulls	NA	S. enterica	Paratyphi B	Present	Beccles	aroC(2)	dnaN(14)	hemD(24)	hisD(14)	purE(37)	sucA(19)	thrA(8)	86	Lineage 7	7.3.1_NorthAfrica1	341219	341219	341219	341219	341219	4708	1620	1620	155	155	2	2				none	99.5	156.25	97.8122	5995650	467
121	70-89	B89-698	1989	1989		France	NA	France	Europe	Western Europe	Europe	Human	Blood	NA	S. enterica	Paratyphi B	Present	Beccles	aroC(2)	dnaN(14)	hemD(24)	hisD(14)	purE(37)	sucA(19)	thrA(8)	86	Lineage 7	7.3.1_NorthAfrica1	341291	341291	341291	341291	4708	4708	1620	1620	155	155	2	2				none	98.91	237.76	97.9698	9054138	480
122	73-67	B67-911	1967	1967	Yes	Algeria	NA	Algeria	Africa	Northern Africa	Africa	Human	Blood	NA	S. enterica	Paratyphi B	Present	RDNC	aroC(2)	dnaN(14)	hemD(24)	hisD(14)	purE(37)	sucA(19)	thrA(8)	86	Lineage 7	7.3.1_NorthAfrica1	341214	341214	341214	341214	4708	4708	1620	1620	155	155	2	2				none	99.11	123.56	98.6113	4683424	226
123	56-66	B66-760	1966	1966		Algeria	NA	Algeria	Africa	Northern Africa	Africa	Human	Blood	NA	S. enterica	Paratyphi B	Present	Not available	aroC(2)	dnaN(14)	hemD(24)	hisD(14)	purE(37)	sucA(19)	thrA(8)	86	Lineage 7	7.3.1_NorthAfrica1	341203	341203	341203	341203	341203	4708	1620	1620	155	155	2	2				none	99.5	77.12	89.4983	3797408	393
124	200306515		2003	2003		France	Turkey	Turkey	Asia	Western Asia	Middle East	Human	Stools	NA	S. enterica	Paratyphi B	Present	3aI	aroC(2)	dnaN(14)	hemD(24)	hisD(14)	purE(37)	sucA(19)	thrA(8)	86	Lineage 7	7.3.1_NorthAfrica1	261561	261561	261561	261561	4708	4708	1620	1620	155	155	2	2	Susceptible			none	99.39	141.52	98.5503	4745764	390
125	147-75	B75-1325	1975	1975		Morocco	NA	Morocco	Africa	Northern Africa	Africa	Human	Blood	NA	S. enterica	Paratyphi B	Present	3aI	aroC(2)	dnaN(14)	hemD(24)	hisD(14)	purE(37)	sucA(19)	thrA(8)	86	Lineage 7	7.3.1_NorthAfrica1	261562	261562	261562	261562	4708	4708	1620	1620	155	155	2	2	Susceptible			none	99.43	94.49	98.6452	3183426	375
126	81-83	B83-1160	1983	1983		France	No travel	France	Europe	Western Europe	Europe	Human	Blood	NA	S. enterica	Paratyphi B	Present	3aI	aroC(2)	dnaN(14)	hemD(24)	hisD(14)	purE(37)	sucA(19)	thrA(8)	86	Lineage 7	7.3.1_NorthAfrica1	289350	289350	289350	289350	4708	4708	1620	1620	155	155	2	2	Susceptible			none	99.48	155.4	97.6592	5308128	374
127	SARA41_FB_1	SARB43, 155-76	1976	1976		France	NA	France	Europe	Western Europe	Europe	Human	Unknown	NA	S. enterica	Paratyphi B	Present	3a	aroC(2)	dnaN(14)	hemD(24)	hisD(14)	purE(37)	sucA(19)	thrA(8)	86	Lineage 7	7.3.1_NorthAfrica1	4708	4708	4708	4708	4708	4708	1620	1620	155	155	2	2				none	99.55	56.6	97.5648	3618618	335
128	201806893		2018	2018	Yes	France	Morocco	Morocco	Africa	Northern Africa	Africa	Human	Blood	NA	S. enterica	Paratyphi B	Present	Not available	aroC(2)	dnaN(14)	hemD(24)	hisD(14)	purE(37)	sucA(19)	thrA(8)	86	Lineage 7	7.3.1_NorthAfrica1	341940	341940	4708	4708	4708	4708	1620	1620	155	155	2	2	Susceptible	8	0.032	none	99.48	90.82	98.6072	3547636	373
129	201308236		2013	2013		France	Morocco	Morocco	Africa	Northern Africa	Africa	Human	Stools	NA	S. enterica	Paratyphi B	Present	Not available	aroC(2)	dnaN(14)	hemD(24)	hisD(14)	purE(37)	sucA(19)	thrA(8)	86	Lineage 7	7.3.1_NorthAfrica1	341317	341317	341317	4708	4708	4708	1620	1620	155	155	2	2	Susceptible	4	0.032	none	99.49	89.01	94.0343	4197272	444
130	201905617		2019	2019		France	Morocco	Morocco	Africa	Northern Africa	Africa	Human	Blood	NA	S. enterica	Paratyphi B	Present	Not available	aroC(2)	dnaN(14)	hemD(24)	hisD(14)	purE(37)	sucA(19)	thrA(8)	86	Lineage 7	7.3.1_NorthAfrica1	342090	342090	342090	4708	4708	4708	1620	1620	155	155	2	2	Susceptible	8	0.047	none	99.35	110.82	98.7355	3699918	375
131	SARA44	DMS 2434	1900-1934	1920		Unknown	NA	Unknown	Unknown	Unknown	Unknown	Human	Unknown	NA	S. enterica	Paratyphi B	Present	Not available	aroC(2)	dnaN(14)	hemD(24)	hisD(14)	purE(37)	sucA(19)	thrA(8)	86	Lineage 7	7.3	42697	42697	42697	42697	42697	4708	1620	1620	155	155	2	2				none	99.52	147.22	95.668	8076668	352
132	NCTC 20223	M318	1935	1935	Yes	Canada	NA	Canada	America	North America	America	Human	Blood	NA	S. enterica	Paratyphi B	Present	Not available	aroC(2)	dnaN(14)	hemD(24)	hisD(14)	purE(37)	sucA(19)	thrA(8)	86	Lineage 7	7.3	12583	12581	12581	12581	12581	4708	1620	1620	155	155	2	2				none	99.49	75.82	97.3813	3733354	371
133	NCTC 20219	M282	1935	1935		Canada	NA	Canada	America	North America	America	Unknown		NA	S. enterica	Paratyphi B	Present	Not available	aroC(2)	dnaN(14)	hemD(24)	hisD(14)	purE(37)	sucA(19)	thrA(8)	86	Lineage 7	7.3	12581	12581	12581	12581	12581	4708	1620	1620	155	155	2	2				none	99.51	85.02	97.0773	4206340	330
134	55-76	B76-984	1976	1976	Yes	France	NA	France	Europe	Western Europe	Europe	Environment	River water	Espierre river	S. enterica	Paratyphi B	Present	BAOR	aroC(2)	dnaN(14)	hemD(24)	hisD(14)	purE(37)	sucA(19)	thrA(8)	86	Lineage 7	7.3.2_BAOR	289306	289306	289306	289306	289306	4708	1620	1620	155	155	2	2	Susceptible			none	98.57	182.98	97.3693	6274340	395
135	B2227		1947	1947	Yes	Germany	NA	Germany	Europe	Western Europe	Europe	Unknown		NA	S. enterica	Paratyphi B	Present	BAOR	aroC(2)	dnaN(14)	hemD(24)	hisD(14)	purE(37)	sucA(19)	thrA(8)	86	Lineage 7	7.3.2_BAOR	341894	341894	341894	341894	168757	4708	1620	1620	155	155	2	2	Susceptible			none	99.9	148.43	97.3895	5035140	350
136	201610287		2016	2016		France	No travel	France	Europe	Western Europe	Europe	Human	Stools	NA	S. enterica	Paratyphi B	Present	Not available	aroC(2)	dnaN(14)	hemD(24)	hisD(14)	purE(37)	sucA(19)	thrA(8)	86	Lineage 7	7.3.2_BAOR	341882	341882	341882	341882	341882	4708	1620	1620	155	155	2	2	Susceptible			none	98.31	101.18	97.7997	3282538	385
137	CIP 54.101	B53-1839	1953	1953		Austria	NA	Austria	Europe	Western Europe	Europe	Unknown		NA	S. enterica	Paratyphi B	Present	BAOR	aroC(2)	dnaN(14)	hemD(24)	hisD(14)	purE(37)	sucA(19)	thrA(8)	86	Lineage 7	7.3.2_BAOR	234057	234057	234057	234057	168757	4708	1620	1620	155	155	2	2				none	98.45	81.29	96.8995	2717508	398
138	16-67	B67-152	1967	1967		Greece	NA	Greece	Europe	Southern Europe	Europe	Animal	Pig Node	NA	S. enterica	Paratyphi B	Present	BAOR	aroC(2)	dnaN(14)	hemD(24)	hisD(14)	purE(37)	sucA(19)	thrA(8)	86	Lineage 7	7.3.2_BAOR	341220	341220	341220	168757	168757	4708	1620	1620	155	155	2	2				none	98.97	147.66	97.0275	5684882	458
139	201007565		2010	2010		France	No travel	France	Europe	Western Europe	Europe	Human	Bile	NA	S. enterica	Paratyphi B	Present	Not available	aroC(2)	dnaN(14)	hemD(24)	hisD(14)	purE(37)	sucA(19)	thrA(8)	86	Lineage 7	7.3.2_BAOR	341307	341307	341307	341307	168757	4708	1620	1620	155	155	2	2	NAL (CIP)	≥ 256	0.19	gyrA_D87Y	98.29	56.6	95.857	2584652	458
140	170-75	B75-1850	1975	1975		France	Algeria	Algeria	Africa	Northern Africa	Africa	Human	Stools	NA	S. enterica	Paratyphi B	Present	BAOR	aroC(2)	dnaN(14)	hemD(24)	hisD(14)	purE(37)	sucA(19)	thrA(8)	86	Lineage 7	7.3.2_BAOR	261564	261564	261564	261564	168757	4708	1620	1620	155	155	2	2	Susceptible			none	98.51	127	97.8621	4303606	409
141	85-77	B77-749	1977	1977	Yes	France	Algeria	Algeria	Africa	Northern Africa	Africa	Human	Blood	NA	S. enterica	Paratyphi B	Present	BAOR	aroC(2)	dnaN(14)	hemD(24)	hisD(14)	purE(37)	sucA(19)	thrA(8)	86	Lineage 7	7.3.2_BAOR	289354	289354	289354	261564	168757	4708	1620	1620	155	155	2	2	Susceptible			none	98.57	208.87	97.5833	6997900	412
142	62-82	B82-927	1982	1982		France	NA	France	Europe	Western Europe	Europe	Human	Stools	NA	S. enterica	Paratyphi B	Present	BAOR	aroC(2)	dnaN(14)	hemD(24)	hisD(14)	purE(37)	sucA(19)	thrA(8)	86	Lineage 7	7.3.2_BAOR	341259	341259	341259	341259	168757	4708	1620	1620	155	155	2	2				none	98.62	104.48	96.0599	4779102	430
143	76-2163		1976	1976		United States (Arizona)	NA	United States of America	America	North America	America	Human	Stools	NA	S. enterica	Paratyphi B	Present	Not available	aroC(2)	dnaN(14)	hemD(24)	hisD(14)	purE(37)	sucA(19)	thrA(8)	86	Lineage 7	7.3.2_BAOR	168757	168757	168757	168757	168757	4708	1620	1620	155	155	2	2	Susceptible			none	98.55	182.7	97.8618	6053674	411
144	B99-6757		1999	1999		France	Morocco	Morocco	Africa	Northern Africa	Africa	Human	Blood	NA	S. enterica	Paratyphi B	Present	BAOR	aroC(2)	dnaN(14)	hemD(24)	hisD(14)	purE(37)	sucA(19)	thrA(8)	86	Lineage 7	7.3.2_BAOR	261594	261594	168757	168757	168757	4708	1620	1620	155	155	2	2	Susceptible			none	98.52	167.02	97.7744	5679448	419
145	B97-8981		1997	1997		France	Morocco	Morocco	Africa	Northern Africa	Africa	Human	Blood	NA	S. enterica	Paratyphi B	Present	BAOR	aroC(2)	dnaN(14)	hemD(24)	hisD(14)	purE(37)	sucA(19)	thrA(8)	86	Lineage 7	7.3.2_BAOR	261597	261597	261597	168757	168757	4708	1620	1620	155	155	2	2	Susceptible			none	98.01	110.3	97.8894	3687860	371
146	54-87	B87-649	1987	1987		France	Morocco	Morocco	Africa	Northern Africa	Africa	Human	Blood	NA	S. enterica	Paratyphi B	Present	RDNC	aroC(2)	dnaN(14)	hemD(24)	hisD(14)	purE(37)	sucA(19)	thrA(8)	86	Lineage 7	7.3.2_BAOR	341257	341257	341257	341257	168757	4708	1620	1620	155	155	2	2				none	98.64	42.68	96.1108	1956834	439
147	201903854		2019	2019	Yes	France	Morocco	Morocco	Africa	Northern Africa	Africa	Human	Stools	NA	S. enterica	Paratyphi B	Present	Not available	aroC(2)	dnaN(14)	hemD(24)	hisD(14)	purE(37)	sucA(19)	thrA(8)	86	Lineage 7	7.3.2_BAOR	341957	341957	341957	341957	168757	4708	1620	1620	155	155	2	2	Susceptible	6	0.012	none	98.53	193.78	97.3376	6234360	438
148	47-89	B89-636	1989	1989	Yes	France	Morocco	Morocco	Africa	Northern Africa	Africa	Human	Stools	NA	S. enterica	Paratyphi B	Present	BAOR	aroC(2)	dnaN(14)	hemD(24)	hisD(14)	purE(37)	sucA(19)	thrA(8)	86	Lineage 7	7.3.2_BAOR	341280	341280	341280	341280	168757	4708	1620	1620	155	155	2	2				none	98.79	135.92	96.4092	5257822	463
149	85-86	B86-762	1986	1986		France	Morocco	Morocco	Africa	Northern Africa	Africa	Human	Stools	NA	S. enterica	Paratyphi B	Present	BAOR	aroC(2)	dnaN(14)	hemD(24)	hisD(14)	purE(37)	sucA(19)	thrA(8)	86	Lineage 7	7.3.2_BAOR	341270	341270	341270	341270	168757	4708	1620	1620	155	155	2	2				none	98.33	109.23	92.5791	5122244	420
150	56-85	B85-855	1985	1985		France	Morocco	Morocco	Africa	Northern Africa	Africa	Human	Blood	NA	S. enterica	Paratyphi B	Present	Taunton	aroC(2)	dnaN(14)	hemD(24)	hisD(14)	purE(37)	sucA(19)	thrA(8)	86	Lineage 7	7.3.2_BAOR	341268	341268	341268	341268	168757	4708	1620	1620	155	155	2	2				none	98.31	109.39	96.5362	4964926	445
151	56-0045	CDC 45-56=SSI	1955	1955	Yes	The Netherlands	NA	The Netherlands	Europe	Western Europe	Europe	Human	Unknown	NA	S. enterica	Paratyphi B	Present	Not available	aroC(2)	dnaN(14)	hemD(24)	hisD(14)	purE(37)	sucA(19)	thrA(8)	86	Lineage 8	8	277465	277465	277465	277465	277465	277465	1620	1620	155	155	2	2	Susceptible			none	99.07	143.93	99.0648	4766292	244
152	B67-134		1967	1967		France	NA	France	Europe	Western Europe	Europe	Human	Unknown	NA	S. enterica	Paratyphi B	Present	3b	aroC(2)	dnaN(14)	hemD(24)	hisD(14)	purE(37)	sucA(19)	thrA(8)	86	Lineage 9	9.0	341923	341923	341923	341923	341893	341893	1620	1620	155	155	2	2	Susceptible			none	99.08	172.89	98.5432	5809570	247
153	B66-1060		1966	1966	Yes	France	NA	France	Europe	Western Europe	Europe	Human	Blood	NA	S. enterica	Paratyphi B	Present	3b	aroC(2)	dnaN(14)	hemD(24)	hisD(14)	purE(37)	sucA(19)	thrA(8)	86	Lineage 9	9.0	341893	341893	341893	341893	341893	341893	1620	1620	155	155	2	2	Susceptible			none	99.08	120.56	98.4888	4178772	235
154	81-67	B67-1047	1967	1967		France	NA	France	Europe	Western Europe	Europe	Environment	Sewage	NA	S. enterica	Paratyphi B	Present	3aI	aroC(2)	dnaN(14)	hemD(24)	hisD(14)	purE(37)	sucA(19)	thrA(8)	86	Lineage 9	9.0	341210	341210	341210	341210	341210	341210	1620	1620	155	155	2	2				none	99.89	46.06	95.3766	2138112	236
155	13-80	B80-298	1980	1980	Yes	France	NA	France	Europe	Western Europe	Europe	Environment	Superficial water	Seine Maritime (Oissel)	S. enterica	Paratyphi B	Present	Beccles	aroC(2)	dnaN(14)	hemD(24)	hisD(14)	purE(-291)	sucA(19)	thrA(8)	-1657	Lineage 9	9.0	289325	289325	289325	289325	289325	289325	1620	1620	155	155	2	2	STR			none	99.68	215.67	98.0095	7311636	337
156	110-76	B76-1190	1976	1976		Iraq	NA	Iraq	Asia	Western Asia	Middle East	Food	Minced beef	NA	S. enterica	Paratyphi B	Present	Beccles	aroC(2)	dnaN(14)	hemD(24)	hisD(14)	purE(37)	sucA(19)	thrA(8)	86	Lineage 9	9.0	289321	289321	289321	289320	289320	289320	1620	1620	155	155	2	2	Susceptible			none	99.62	176.31	97.7337	6072236	278
157	108-76	B76-1188	1976	1976		Iraq	NA	Iraq	Asia	Western Asia	Middle East	Food	Herbs	NA	S. enterica	Paratyphi B	Present	3aI	aroC(2)	dnaN(14)	hemD(24)	hisD(14)	purE(37)	sucA(19)	thrA(8)	86	Lineage 9	9.0	289320	289320	289320	289320	289320	289320	1620	1620	155	155	2	2	Susceptible			none	99.57	183.45	97.6804	6209450	274
158	47-84	B84-1166	1984	1984		France	NA	France	Europe	Western Europe	Europe	Environment	River water	Herault river	S. enterica	Paratyphi B	Present	Taunton	aroC(2)	dnaN(14)	hemD(24)	hisD(14)	purE(37)	sucA(19)	thrA(8)	86	Lineage 9	9.0	289301	289301	289301	289301	289301	289301	1620	1620	155	155	2	2	Susceptible			none	98.82	135.58	98.0966	4600828	293
159	77-0322		1977	1977		United States (Arizona)	NA	United States of America	America	North America	America	Human	Stools	NA	S. enterica	Paratyphi B	Present	Not available	aroC(2)	dnaN(14)	hemD(24)	hisD(14)	purE(37)	sucA(19)	thrA(8)	86	Lineage 9	9.0	277457	277457	277457	277457	277457	41265	1620	1620	155	155	2	2	Susceptible			none	99.9	144.54	98.6213	4926974	256
160	15-65	B65-528	1965	1965	Yes	France	NA	France	Europe	Western Europe	Europe	Human	Bile	NA	S. enterica	Paratyphi B	Present	3aI	aroC(2)	dnaN(14)	hemD(24)	hisD(14)	purE(37)	sucA(19)	thrA(8)	86	Lineage 9	9.0	261535	261535	261535	261535	261535	41265	1620	1620	155	155	2	2	Susceptible			none	98.78	131.51	98.4851	4405166	302
161	SPPI_26		1958	1958	Yes	Russian Federation (St-Petersburg region)	NA	Russian Federation	Europe	Eastern Europe	Europe	Human	Unknown	NA	S. enterica	Paratyphi B	Present	Not available	aroC(2)	dnaN(14)	hemD(24)	hisD(14)	purE(37)	sucA(19)	thrA(8)	86	Lineage 9	9.0	289312	289312	289312	289312	289312	41265	1620	1620	155	155	2	2	Susceptible			none	99.87	205.65	97.6333	6987770	242
162	75-0754		1975	1975		United States (Oregon)	NA	United States of America	America	North America	America	Human	Stools	NA	S. enterica	Paratyphi B	Present	Not available	aroC(2)	dnaN(14)	hemD(24)	hisD(14)	purE(37)	sucA(19)	thrA(8)	86	Lineage 9	9.0	277460	168767	168767	168767	168767	41265	1620	1620	155	155	2	2	Susceptible			none	99.93	145.25	98.2326	4837906	261
163	B60-1917		1960	1960	Yes	Germany	NA	Germany	Europe	Western Europe	Europe	Human	Unknown	NA	S. enterica	Paratyphi B	Present	3aI	aroC(2)	dnaN(14)	hemD(24)	hisD(14)	purE(37)	sucA(19)	thrA(8)	86	Lineage 9	9.0	41265	41265	41265	41265	41265	41265	1620	1620	155	155	2	2	Susceptible			none	99.41	97.3	98.0357	5056680	247
164	CIP 54.104	B53-1210	1953	1953	Yes	Austria	NA	Austria	Europe	Western Europe	Europe	Unknown		NA	S. enterica	Paratyphi B	Present	3b	aroC(2)	dnaN(14)	hemD(24)	hisD(14)	purE(37)	sucA(19)	thrA(8)	86	Lineage 9	9.0	234051	234051	234051	234051	234051	41265	1620	1620	155	155	2	2				none	99.07	68.74	96.9573	2276660	260
165	CIP 54.114	B53-1849	1953	1953		Austria	NA	Austria	Europe	Western Europe	Europe	Unknown		NA	S. enterica	Paratyphi B	Present	Dundee	aroC(2)	dnaN(14)	hemD(24)	hisD(14)	purE(37)	sucA(19)	thrA(8)	86	Lineage 9	9.0	234059	234059	234059	234059	234051	41265	1620	1620	155	155	2	2				none	99.83	79.9	96.3251	2672966	253
166	B64-728		1964	1964	Yes	France	NA	France	Europe	Western Europe	Europe	Human	Unknown	NA	S. enterica	Paratyphi B	Present	3b	aroC(2)	dnaN(14)	hemD(24)	hisD(14)	purE(37)	sucA(19)	thrA(8)	86	Lineage 9	9.1_France	342094	342094	342094	261618	69918	41265	1620	1620	155	155	2	2	Susceptible			none	99.08	203.67	97.4989	7115956	241
167	4-61	B601-29	1961	1961	Yes	France	NA	France	Europe	Western Europe	Europe	Human	Blood	NA	S. enterica	Paratyphi B	Present	Dundee	aroC(2)	dnaN(14)	hemD(24)	hisD(14)	purE(37)	sucA(19)	thrA(8)	86	Lineage 9	9.1_France	341187	341187	341187	341187	69918	41265	1620	1620	155	155	2	2				none	99.94	50.72	87.1963	2585202	250
168	1-59	B59-76	1959	1959		France	NA	France	Europe	Western Europe	Europe	Human	Blood	NA	S. enterica	Paratyphi B	Present	Dundee	aroC(2)	dnaN(14)	hemD(24)	hisD(14)	purE(37)	sucA(19)	thrA(8)	86	Lineage 9	9.1_France	341195	341195	341195	69918	69918	41265	1620	1620	155	155	2	2				none	99.94	141.2	96.9528	5495966	248
169	202101415		2021	2021	Outlier in Tempest	France	No travel	France	Europe	Western Europe	Europe	Human	Stools	NA	S. enterica	Paratyphi B	Present	Not available	aroC(2)	dnaN(14)	hemD(24)	hisD(14)	purE(37)	sucA(19)	thrA(8)	86	Lineage 9	9.1_France	259999	259999	259999	259999	259999	259999	259999	1620	155	155	2	2	Susceptible	3	0.023	none	99.91	141.67	97.2617	4977458	502
170	201808772		2018	2018	Outlier in Tempest	France	No travel	France	Europe	Western Europe	Europe	Human	Stools	NA	S. enterica	Paratyphi B	Present	Not available	aroC(2)	dnaN(14)	hemD(24)	hisD(14)	purE(37)	sucA(19)	thrA(8)	86	Lineage 9	9.1_France	341948	341948	341948	341948	341948	341948	1620	1620	155	155	2	2	NAL (CIP)	≥ 256	0.25	gyrA_D87N	99.07	164.83	98.7986	5577104	475
171	208-73	B73-2085	1973	1973		France	NA	France	Europe	Western Europe	Europe	Human	Blood	NA	S. enterica	Paratyphi B	Present	Dundee	aroC(2)	dnaN(14)	hemD(24)	hisD(14)	purE(37)	sucA(19)	thrA(8)	86	Lineage 9	9.1_France	341225	341225	341225	69918	69918	41265	1620	1620	155	155	2	2				none	99.94	75.64	97.022	2942510	247
172	8-80	B80-158	1980	1980	Yes	France	NA	France	Europe	Western Europe	Europe	Environment	River water	Ill river (Wantzenau)	S. enterica	Paratyphi B	Present	Dundee	aroC(2)	dnaN(14)	hemD(24)	hisD(14)	purE(37)	sucA(19)	thrA(8)	86	Lineage 9	9.1_France	289299	289299	289299	289299	69918	41265	1620	1620	155	155	2	2	Susceptible			none	99.93	191.2	97.5812	6546352	255
173	159-74	B74-1714	1974	1974		France	NA	France	Europe	Western Europe	Europe	Human	Blood	NA	S. enterica	Paratyphi B	Present	Beccles	aroC(2)	dnaN(14)	hemD(24)	hisD(1845)	purE(37)	sucA(19)	thrA(8)	10013	Lineage 9	9.1_France	341262	341262	341262	341262	341262	41265	1620	1620	155	155	2	2				none	99.94	175.85	98.1363	6764202	304
174	B91-314		1991	1991		France	No travel	France	Europe	Western Europe	Europe	Human	Blood	NA	S. enterica	Paratyphi B	Present	Dundee	aroC(2)	dnaN(14)	hemD(24)	hisD(14)	purE(37)	sucA(19)	thrA(8)	86	Lineage 9	9.1_France	261589	261589	261589	261589	69918	41265	1620	1620	155	155	2	2	Susceptible			none	99.88	110.51	97.5969	3800130	275
175	57-76	B76-986	1976	1976	Yes	France	NA	France	Europe	Western Europe	Europe	Environment	River water	Canal de la Somme	S. enterica	Paratyphi B	Present	Dundee	aroC(2)	dnaN(14)	hemD(24)	hisD(14)	purE(37)	sucA(19)	thrA(8)	86	Lineage 9	9.1_France	289355	289355	289355	289355	69918	41265	1620	1620	155	155	2	2	Susceptible			none	99.81	184.06	97.3969	6354190	261
176	2-59	B59-334	1959	1959		France	NA	France	Europe	Western Europe	Europe	Human	Bone	NA	S. enterica	Paratyphi B	Present	Dundee	aroC(2)	dnaN(14)	hemD(24)	hisD(14)	purE(37)	sucA(19)	thrA(8)	86	Lineage 9	9.1_France	290790	290790	290790	290790	69918	41265	1620	1620	155	155	2	2	Susceptible			none	99.94	126.31	97.4981	4177212	241
177	9-83	B83-161	1983	1983		France	No travel	France	Europe	Western Europe	Europe	Human	Stools	NA	S. enterica	Paratyphi B	Present	Dundee	aroC(2)	dnaN(14)	hemD(24)	hisD(14)	purE(37)	sucA(19)	thrA(8)	86	Lineage 9	9.1_France	289303	289303	289303	289303	69918	41265	1620	1620	155	155	2	2	Susceptible			none	99.92	179.33	97.5817	6119474	256
178	B2590		1947	1947	Yes	United Kingdom	NA	United Kingdom	Europe	Northern Europe	Europe	Unknown		NA	S. enterica	Paratyphi B	Present	Dundee	aroC(2)	dnaN(14)	hemD(24)	hisD(14)	purE(37)	sucA(19)	thrA(8)	86	Lineage 9	9.1_France	341900	341900	341900	341900	69918	41265	1620	1620	155	155	2	2	Susceptible			none	99.97	186.82	97.5553	6294010	253
179	82-69	B69-1205	1969	1969		France	NA	France	Europe	Western Europe	Europe	Human	Stools	NA	S. enterica	Paratyphi B	Present	Dundee	aroC(2)	dnaN(14)	hemD(24)	hisD(14)	purE(37)	sucA(19)	thrA(8)	86	Lineage 9	9.1_France	341247	341247	341247	341247	341247	341247	1620	1620	155	155	2	2				none	99.94	113.84	91.3196	4704012	367
180	201800858		2018	2018		France	No travel	France	Europe	Western Europe	Europe	Human	Stools	NA	S. enterica	Paratyphi B	Present	Not available	aroC(2)	dnaN(14)	hemD(24)	hisD(14)	purE(37)	sucA(19)	thrA(8)	86	Lineage 9	9.1_France	341947	341947	341947	261618	69918	41265	1620	1620	155	155	2	2	NAL (CIP)	≥ 256	0.125	gyrA_S83F	99.86	135.44	97.3495	4503832	253
181	27-60	B60-1582	1960	1960		Luxembourg	NA	Luxembourg	Europe	Western Europe	Europe	Human	Stools	NA	S. enterica	Paratyphi B	Present	Dundee	aroC(2)	dnaN(14)	hemD(24)	hisD(14)	purE(37)	sucA(19)	thrA(8)	86	Lineage 9	9.1_France	341190	341190	341190	261618	69918	41265	1620	1620	155	155	2	2				none	99.94	181.9	96.9885	7080168	242
182	28-60	B60-1580	1960	1960		Luxembourg	NA	Luxembourg	Europe	Western Europe	Europe	Human	Stools	NA	S. enterica	Paratyphi B	Present	Dundee	aroC(2)	dnaN(14)	hemD(24)	hisD(14)	purE(37)	sucA(19)	thrA(8)	86	Lineage 9	9.1_France	341185	341185	341185	341185	69918	41265	1620	1620	155	155	2	2				none	99.13	43.34	96.3461	1992660	244
183	106-82	B82-1268	1982	1982		France	NA	France	Europe	Western Europe	Europe	Human	Stools	NA	S. enterica	Paratyphi B	Present	Dundee	aroC(2)	dnaN(14)	hemD(24)	hisD(14)	purE(37)	sucA(19)	thrA(8)	86	Lineage 9	9.1_France	341260	341260	341260	261618	69918	41265	1620	1620	155	155	2	2				none	99.94	135.37	96.228	6254790	248
184	2-56	B56-487	1956	1956	Yes	France	NA	France	Europe	Western Europe	Europe	Human	Unknown	NA	S. enterica	Paratyphi B	Present	Dundee	aroC(2)	dnaN(14)	hemD(24)	hisD(14)	purE(37)	sucA(19)	thrA(8)	86	Lineage 9	9.1_France	341182	341182	341182	261618	69918	41265	1620	1620	155	155	2	2	Susceptible			none	99.94	95.43	95.2231	4455368	236
185	29-66	B66-57	1966	1966		France	NA	France	Europe	Western Europe	Europe	Human	Stools	NA	S. enterica	Paratyphi B	Present	Dundee	aroC(2)	dnaN(14)	hemD(24)	hisD(14)	purE(37)	sucA(19)	thrA(8)	86	Lineage 9	9.1_France	341209	341209	341209	261618	69918	41265	1620	1620	155	155	2	2				none	99.91	140.37	97.1814	5445534	254
186	73-66	B66-1040	1966	1966	Yes	France	NA	France	Europe	Western Europe	Europe	Human	Stools	NA	S. enterica	Paratyphi B	Present	Dundee	aroC(2)	dnaN(14)	hemD(24)	hisD(14)	purE(37)	sucA(19)	thrA(8)	86	Lineage 9	9.1_France	341227	341227	341227	341211	69918	41265	1620	1620	155	155	2	2				none	99.94	216.22	97.7133	8341094	262
187	6-66	B66-153	1966	1966		France	NA	France	Europe	Western Europe	Europe	Human	Stools	NA	S. enterica	Paratyphi B	Present	Dundee	aroC(2)	dnaN(14)	hemD(24)	hisD(14)	purE(37)	sucA(19)	thrA(8)	86	Lineage 9	9.1_France	341211	341211	341211	341211	69918	41265	1620	1620	155	155	2	2				none	99.53	214.38	97.131	8296686	367
188	56-73	B73-921	1973	1973		France	NA	France	Europe	Western Europe	Europe	Human	Stools	NA	S. enterica	Paratyphi B	Present	Beccles	aroC(2)	dnaN(14)	hemD(24)	hisD(14)	purE(37)	sucA(19)	thrA(8)	86	Lineage 9	9.1_France	341255	341255	341255	341211	69918	41265	1620	1620	155	155	2	2				none	99.94	113.81	97.4866	4404318	269
189	40-60	B60-2050	1960	1960	Yes	France	NA	France	Europe	Western Europe	Europe	Human	Blood	NA	S. enterica	Paratyphi B	Present	Beccles	aroC(2)	dnaN(14)	hemD(24)	hisD(14)	purE(37)	sucA(19)	thrA(8)	86	Lineage 9	9.1_France	341199	341199	289322	289322	69918	41265	1620	1620	155	155	2	2				none	99.94	154.05	95.2415	6106150	240
190	10-57	B57-1376	1957	1957		France	NA	France	Europe	Western Europe	Europe	Human	Unknown	NA	S. enterica	Paratyphi B	Present	3b	aroC(2)	dnaN(14)	hemD(24)	hisD(14)	purE(37)	sucA(19)	thrA(8)	86	Lineage 9	9.1_France	341179	341179	341179	261618	69918	41265	1620	1620	155	155	2	2				none	99.14	200.2	96.2076	7802058	241
191	120-74	B74-1522	1974	1974		France	NA	France	Europe	Western Europe	Europe	Human	Blood	NA	S. enterica	Paratyphi B	Present	Beccles	aroC(2)	dnaN(14)	hemD(24)	hisD(14)	purE(37)	sucA(19)	thrA(8)	86	Lineage 9	9.1_France	341238	341238	341238	341238	69918	41265	1620	1620	155	155	2	2				none	99.94	79.5	93.7248	3767710	260
192	200800999		2008	2008		France	Unknown	France or elsewhere	Unknown	Unknown	Unknown	Human	Stools	NA	S. enterica	Paratyphi B	Present	Not available	aroC(2)	dnaN(14)	hemD(24)	hisD(14)	purE(37)	sucA(19)	thrA(8)	86	Lineage 9	9.1_France	261579	261579	261579	261579	261579	41265	1620	1620	155	155	2	2	NAL CIP	≥ 256	0.5	gyrA_S83F	99.87	121.94	97.4248	4220434	317
193	200808918		2008	2008		France	Unknown	France or elsewhere	Unknown	Unknown	Unknown	Human	Unknown	NA	S. enterica	Paratyphi B	Present	Not available	aroC(2)	dnaN(14)	hemD(24)	hisD(14)	purE(37)	sucA(19)	thrA(8)	86	Lineage 9	9.1_France	261584	261584	261584	261584	69918	41265	1620	1620	155	155	2	2	Susceptible			none	99.92	100.94	97.762	3481302	245
194	60-84	B84-716	1984	1984		France	NA	France	Europe	Western Europe	Europe	Environment	Superficial water	Brittany	S. enterica	Paratyphi B	Present	Dundee	aroC(2)	dnaN(14)	hemD(24)	hisD(14)	purE(37)	sucA(19)	thrA(8)	86	Lineage 9	9.1_France	289695	289695	289695	289695	289695	41265	1620	1620	155	155	2	2	STR			none	98.86	214	96.8874	7264208	322
195	202107503		2021	2021	Yes	France	No travel	France	Europe	Western Europe	Europe	Human	Stools	NA	S. enterica	Paratyphi B	Present	Not available	aroC(2)	dnaN(14)	hemD(24)	hisD(14)	purE(37)	sucA(19)	thrA(8)	86	Lineage 9	9.1_France	289427	289427	289427	289427	69918	41265	1620	1620	155	155	2	2	Susceptible	2	0.008	none	99.94	104.92	97.9134	3637634	246
196	201703686		2017	2017		France	Unknown	France or elsewhere	Unknown	Unknown	Unknown	Human	Wound	NA	S. enterica	Paratyphi B	Present	Not available	aroC(2)	dnaN(14)	hemD(24)	hisD(14)	purE(37)	sucA(19)	thrA(8)	86	Lineage 9	9.1_France	256880	256880	256880	256880	69918	41265	1620	1620	155	155	2	2	STR	6	0.023	none	99.51	103	97.9615	3622700	326
197	20-77	B77-177	1977	1977		France	No travel	France	Europe	Western Europe	Europe	Human	Blood	NA	S. enterica	Paratyphi B	Present	Dundee	aroC(2)	dnaN(14)	hemD(24)	hisD(14)	purE(37)	sucA(19)	thrA(8)	86	Lineage 9	9.1_France	289304	289304	289304	289304	69918	41265	1620	1620	155	155	2	2	Susceptible			none	99.94	165.45	97.4146	5694112	257
198	62-65	B65-1014	1965	1965		France	NA	France	Europe	Western Europe	Europe	Human	Blood	NA	S. enterica	Paratyphi B	Present	Dundee	aroC(2)	dnaN(14)	hemD(24)	hisD(14)	purE(37)	sucA(19)	thrA(8)	86	Lineage 9	9.1_France	341192	341192	289305	289305	69918	41265	1620	1620	155	155	2	2				none	99.94	148.89	94.2933	5957298	247
199	21-59	B59-1499	1959	1959	Yes	France	NA	France	Europe	Western Europe	Europe	Human	Blood	NA	S. enterica	Paratyphi B	Present	Dundee	aroC(2)	dnaN(14)	hemD(24)	hisD(14)	purE(37)	sucA(19)	thrA(8)	86	Lineage 9	9.1_France	341186	341186	289305	289305	69918	41265	1620	1620	155	155	2	2				none	99.18	118.44	96.0001	4624708	243
200	18-84	B84-157	1984	1984		France	NA	France	Europe	Western Europe	Europe	Environment	River water	Loire river	S. enterica	Paratyphi B	Present	Dundee	aroC(2)	dnaN(14)	hemD(24)	hisD(14)	purE(37)	sucA(19)	thrA(8)	86	Lineage 9	9.1_France	289305	289305	289305	289305	69918	41265	1620	1620	155	155	2	2	Susceptible			none	99.93	109.98	97.4918	3797118	237
201	201600075		2016	2016		France	No travel	France	Europe	Western Europe	Europe	Human	Stools	NA	S. enterica	ND:b:1,2	Present	Not available	aroC(2)	dnaN(14)	hemD(24)	hisD(14)	purE(37)	sucA(19)	thrA(8)	86	Lineage 9	9.1_France	341879	341879	341879	341879	69918	41265	1620	1620	155	155	2	2	Susceptible			none	99.89	80.43	98.8945	2678316	277
202	201901362		2019	2019	Yes	France	No travel	France	Europe	Western Europe	Europe	Human	Stools	NA	S. enterica	Paratyphi B	Present	Not available	aroC(2)	dnaN(14)	hemD(24)	hisD(14)	purE(37)	sucA(19)	thrA(8)	86	Lineage 9	9.1_France	341934	341934	341934	341934	69918	41265	1620	1620	155	155	2	2	NAL (CIP)	≥ 256	0.25	gyrA_D82N	99.63	54.48	98.3851	1827738	257
203	5-68	B68-70	1968	1968		France	NA	France	Europe	Western Europe	Europe	Human	Blood	NA	S. enterica	Paratyphi B	Present	Dundee	aroC(2)	dnaN(14)	hemD(24)	hisD(14)	purE(37)	sucA(19)	thrA(8)	86	Lineage 9	9.1_France	341236	341236	289305	289305	69918	41265	1620	1620	155	155	2	2				none	99.94	148.24	96.8264	5778728	245
204	84-70	B70-1147	1970	1970		France	NA	France	Europe	Western Europe	Europe	Human	Blood	NA	S. enterica	Paratyphi B	Present	Dundee	aroC(2)	dnaN(14)	hemD(24)	hisD(14)	purE(37)	sucA(19)	thrA(8)	86	Lineage 9	9.1_France	341240	341240	341240	289305	69918	41265	1620	1620	155	155	2	2				none	99.94	165.1	97.0249	6416986	247
205	27-68	B68-332	1968	1968		France	NA	France	Europe	Western Europe	Europe	Human	Blood	NA	S. enterica	Paratyphi B	Present	Not available	aroC(2)	dnaN(14)	hemD(24)	hisD(14)	purE(37)	sucA(19)	thrA(8)	86	Lineage 9	9.1_France	341216	341216	341216	341216	69918	41265	1620	1620	155	155	2	2				none	99.94	126.52	94.4512	5051158	261
206	201904345		2019	2019	Yes	France	No travel	France	Europe	Western Europe	Europe	Human	Stools	NA	S. enterica	ND:b:1,2	Present	Not available	aroC(2)	dnaN(14)	hemD(24)	hisD(14)	purE(37)	sucA(19)	thrA(8)	86	Lineage 9	9.1_France	341942	341942	341942	341942	69918	41265	1620	1620	155	155	2	2	Susceptible	1.5	0.008	none	99.86	129.7	99.4762	4212162	246
207	63-66	B66-849	1966	1966		France	NA	France	Europe	Western Europe	Europe	Human	Blood	NA	S. enterica	Paratyphi B	Present	Dundee	aroC(2)	dnaN(14)	hemD(24)	hisD(14)	purE(37)	sucA(19)	thrA(8)	86	Lineage 9	9.1_France	341206	341206	341206	289322	69918	41265	1620	1620	155	155	2	2				none	99.94	163.46	96.7975	6375404	256
208	61-66	B66-786	1966	1966		France	NA	France	Europe	Western Europe	Europe	Human	Blood	NA	S. enterica	Paratyphi B	Present	Dundee	aroC(2)	dnaN(14)	hemD(24)	hisD(14)	purE(37)	sucA(19)	thrA(8)	86	Lineage 9	9.1_France	341204	341204	341204	341204	69918	41265	1620	1620	155	155	2	2				none	99.94	79.14	96.3419	3647724	255
209	87-89	B89-771	1989	1989	Yes	France	NA	France	Europe	Western Europe	Europe	Human	Stools	NA	S. enterica	Paratyphi B	Present	1	aroC(2)	dnaN(14)	hemD(24)	hisD(14)	purE(37)	sucA(19)	thrA(8)	86	Lineage 9	9.1_France	341310	341310	341310	341310	69918	41265	1620	1620	155	155	2	2				none	99.92	228.43	98.1351	8771102	260
210	7-83	B83-159	1983	1983	Yes	France	NA	France	Europe	Western Europe	Europe	Environment	River water	Canal de la Lys (Werwicq)	S. enterica	Paratyphi B	Present	Dundee	aroC(2)	dnaN(14)	hemD(24)	hisD(14)	purE(37)	sucA(19)	thrA(8)	86	Lineage 9	9.1_France	289298	289298	289298	289298	69918	41265	1620	1620	155	155	2	2	Susceptible			none	99.94	182.46	97.7098	6231516	259
211	101-83	B83-1367	1983	1983		France	No travel	France	Europe	Western Europe	Europe	Human	Bile	NA	S. enterica	Paratyphi B	Present	Taunton	aroC(2)	dnaN(14)	hemD(24)	hisD(14)	purE(37)	sucA(19)	thrA(8)	86	Lineage 9	9.1_France	289322	289322	289322	289322	69918	41265	1620	1620	155	155	2	2	Susceptible			none	99.94	164.07	95.8577	5747650	227
212	42-69	B69-798	1969	1969		France	NA	France	Europe	Western Europe	Europe	Human	Stools	NA	S. enterica	Paratyphi B	Present	Dundee	aroC(2)	dnaN(14)	hemD(24)	hisD(14)	purE(37)	sucA(19)	thrA(8)	86	Lineage 9	9.1_France	341229	341229	341229	289322	69918	41265	1620	1620	155	155	2	2				none	99.94	91.98	97.2743	3566332	269
213	129-74	B74-1603	1974	1974		France	NA	France	Europe	Western Europe	Europe	Human	Stools	NA	S. enterica	Paratyphi B	Present	Dundee	aroC(2)	dnaN(14)	hemD(24)	hisD(14)	purE(37)	sucA(19)	thrA(8)	86	Lineage 9	9.1_France	341239	341239	341239	289322	69918	41265	1620	1620	155	155	2	2				none	99.91	130.53	97.2916	5064114	263
214	168-73	B73-1613	1973	1973	Yes	France	NA	France	Europe	Western Europe	Europe	Human	Blood	NA	S. enterica	Paratyphi B	Present	Dundee	aroC(2)	dnaN(14)	hemD(24)	hisD(14)	purE(37)	sucA(19)	thrA(8)	86	Lineage 9	9.1_France	341242	341242	341242	289322	69918	41265	1620	1620	155	155	2	2				none	99.94	95.8	96.9012	3729806	255
215	80-69	B69-1203	1969	1969		France	NA	France	Europe	Western Europe	Europe	Human	Blood	NA	S. enterica	Paratyphi B	Present	Dundee	aroC(2)	dnaN(14)	hemD(24)	hisD(14)	purE(37)	sucA(19)	thrA(8)	86	Lineage 9	9.1_France	341244	341244	341244	289322	69918	41265	1620	1620	155	155	2	2				none	99.94	120.88	96.7666	4711708	254
216	201103752		2010	2010		France	No travel	France	Europe	Western Europe	Europe	Human	Stools	NA	S. enterica	Paratyphi B	Present	Not available	aroC(2)	dnaN(14)	hemD(24)	hisD(14)	purE(37)	sucA(19)	thrA(8)	86	Lineage 9	9.1_France	341312	341312	341312	341312	69918	41265	1620	1620	155	155	2	2	NAL (CIP)	≥ 256	0.25	gyrA_S83F	99.8	76.63	96.6846	3528670	261
217	45-86	B86-401	1986	1986	Yes	Austria	NA	Austria	Europe	Western Europe	Europe	Human	Unknown	NA	S. enterica	Paratyphi B	Present	3aI	aroC(2)	dnaN(14)	hemD(24)	hisD(14)	purE(37)	sucA(19)	thrA(8)	86	Lineage 10	10.0	261570	261570	261570	261570	261570	1620	1620	1620	155	155	2	2	Susceptible			none	99.82	121.08	98.8786	4113732	283
218	RPO 6464		1984	1984		Chile	No travel	Chile	America	South America	America	Human	Unknown	NA	S. enterica	Paratyphi B	Present	Not available	aroC(2)	dnaN(14)	hemD(24)	hisD(14)	purE(37)	sucA(19)	thrA(8)	86	Lineage 10	10.0	340107	340107	340107	340107	340107	123844	1620	1620	155	155	2	2				none	99.93	137.93	97.9072	7071524	232
219	SMG-20-978		1997	1997		United Kingdom	NA	United Kingdom	Europe	Northern Europe	Europe	Human	Unknown	NA	S. enterica	Paratyphi B	Present	3aI	aroC(2)	dnaN(14)	hemD(24)	hisD(14)	purE(37)	sucA(19)	thrA(8)	86	Lineage 10	10.0	234064	234064	234064	234064	234064	123844	1620	1620	155	155	2	2				none	99.94	116.72	97.4315	2149270	221
220	SMG-18-831		2018	2018	Yes	United Kingdom	Ethiopia	Ethiopia	Africa	Eastern Africa	Africa	Human	Blood	NA	S. enterica	Paratyphi B	Present	Not available	aroC(2)	dnaN(14)	hemD(24)	hisD(14)	purE(37)	sucA(19)	thrA(8)	86	Lineage 10	10.0	123844	123844	123844	123844	123844	123844	1620	1620	155	155	2	2				none	99.09	112.98	98.3408	3661718	241
221	138-71	B71-1901	1971	1971		Egypt	NA	Egypt	Africa	Northern Africa	Middle East	Human	Unknown	NA	S. enterica	Paratyphi B	Present	3aI	aroC(2)	dnaN(14)	hemD(24)	hisD(14)	purE(228)	sucA(19)	thrA(8)	772	Lineage 10	10.0	261577	261577	261577	261577	234064	123844	1620	1620	155	155	2	2	Susceptible			none	99.68	117.61	98.7545	3971730	225
222	139-71	B71-1902	1971	1971	Yes	Egypt	NA	Egypt	Africa	Northern Africa	Middle East	Human	Unknown	NA	S. enterica	Paratyphi B	Present	3aI	aroC(2)	dnaN(14)	hemD(24)	hisD(14)	purE(37)	sucA(19)	thrA(8)	86	Lineage 10	10.0	261575	261575	261575	261575	261575	123844	1620	1620	155	155	2	2	Susceptible			none	99.9	136.19	99.1175	4600042	264
223	201206684		2012	2012	Outlier in Tempest	France	No travel	France	Europe	Western Europe	Europe	Human	Stools	NA	S. enterica	Paratyphi B	Present	Not available	aroC(2)	dnaN(14)	hemD(24)	hisD(14)	purE(37)	sucA(19)	thrA(8)	86	Lineage 10	10.0	341910	341910	341910	341910	341910	341910	341910	1620	155	155	2	2	NAL (CIP)	≥ 256	0.19	gyrA_S83F	99.9	146.81	98.9661	4857982	779
224	73-6774	72-3610	1972	1972		United States	NA	United States of America	America	North America	America	Human	Stools	NA	S. enterica	Paratyphi B	Present	Not available	aroC(2)	dnaN(14)	hemD(24)	hisD(14)	purE(37)	sucA(19)	thrA(8)	86	Lineage 10	10.0	277455	277455	277455	277455	1857	1620	1620	1620	155	155	2	2	Susceptible			none	99.94	140.58	99.1411	4536320	223
225	CIP 54.106	B53-1842	1953	1953	Yes	Austria	NA	Austria	Europe	Western Europe	Europe	Unknown		NA	S. enterica	Paratyphi B	Present	3a	aroC(2)	dnaN(14)	hemD(24)	hisD(14)	purE(37)	sucA(19)	thrA(8)	86	Lineage 10	10.0	234052	234052	234052	234052	234052	1620	1620	1620	155	155	2	2				none	99.06	57.81	98.579	1948476	226
226	SPPI_23		1957	1957	Yes	Russian Federation (St-Petersburg region)	NA	Russian Federation	Europe	Eastern Europe	Europe	Human	Unknown	NA	S. enterica	Paratyphi B	Present	Not available	aroC(2)	dnaN(14)	hemD(24)	hisD(14)	purE(37)	sucA(19)	thrA(8)	86	Lineage 10	10.1	289310	289310	289310	289310	5867	1620	1620	1620	155	155	2	2	Susceptible			none	99.51	183.77	98.6275	6098242	234
227	SPPI_24		1957	1957		Russian Federation (St-Petersburg region)	NA	Russian Federation	Europe	Eastern Europe	Europe	Human	Unknown	NA	S. enterica	Paratyphi B	Present	Not available	aroC(2)	dnaN(14)	hemD(24)	hisD(14)	purE(37)	sucA(19)	thrA(8)	86	Lineage 10	10.1	289314	289314	289314	289314	5867	1620	1620	1620	155	155	2	2	Susceptible			none	99.93	132.3	97.8306	4499070	245
228	73-65	B65-1324	1965	1965	Yes	Turkey	NA	Turkey	Asia	Western Asia	Middle East	Human	Stools	NA	S. enterica	Paratyphi B	Present	3aI	aroC(2)	dnaN(14)	hemD(24)	hisD(14)	purE(37)	sucA(19)	thrA(8)	86	Lineage 10	10.1	341189	341189	341189	341184	5867	1620	1620	1620	155	155	2	2				none	99.94	91.89	98.1317	4149982	245
229	72-65	B65-1323	1965	1965		Turkey	NA	Turkey	Asia	Western Asia	Middle East	Human	Stools	NA	S. enterica	Paratyphi B	Present	3aI	aroC(2)	dnaN(14)	hemD(24)	hisD(14)	purE(37)	sucA(19)	thrA(8)	86	Lineage 10	10.1	341184	341184	341184	341184	5867	1620	1620	1620	155	155	2	2				none	99.94	99.74	97.7986	3845376	252
230	74-65	B65-1325	1965	1965		Turkey	NA	Turkey	Asia	Western Asia	Middle East	Human	Stools	NA	S. enterica	Paratyphi B	Present	3aI	aroC(2)	dnaN(14)	hemD(24)	hisD(14)	purE(37)	sucA(19)	thrA(8)	86	Lineage 10	10.1	341184	341184	341184	341184	5867	1620	1620	1620	155	155	2	2				none	99.94	117.19	98.1906	4497960	248
231	HB3		1934	1934	Yes	Mandatory Palestine	NA	Mandatory Palestine	Asia	Western Asia	Middle East	Unknown		NA	S. enterica	Paratyphi B	Present	Not available	aroC(2)	dnaN(14)	hemD(24)	hisD(14)	purE(228)	sucA(19)	thrA(8)	772	Lineage 10	10.1.1_Europe1	37831	5867	5867	5867	5867	1620	1620	1620	155	155	2	2	Susceptible			none	99.94	102.97	98.7116	5326036	254
232	201810947		2018	2018		France	No travel	France	Europe	Western Europe	Europe	Human	Urine	NA	S. enterica	Paratyphi B	Present	Not available	aroC(2)	dnaN(14)	hemD(24)	hisD(14)	purE(37)	sucA(19)	thrA(8)	86	Lineage 10	10.1.1_Europe1	260151	256895	256882	256882	5867	1620	1620	1620	155	155	2	2	Susceptible	6	0.012	none	99.77	62.91	99.1117	2056036	238
233	202000526		2020	2020		France	No travel	France	Europe	Western Europe	Europe	Human	Stools	NA	S. enterica	Paratyphi B	Present	Not available	aroC(2)	dnaN(14)	hemD(24)	hisD(14)	purE(37)	sucA(19)	thrA(8)	86	Lineage 10	10.1.1_Europe1	256895	256895	256882	256882	5867	1620	1620	1620	155	155	2	2	Susceptible	4	0.012	none	99.94	109.82	99.0356	3620210	245
234	201900502		2019	2019		France	Spain	Spain	Europe	Southern Europe	Europe	Human	Stools	NA	S. enterica	Paratyphi B	Present	Not available	aroC(2)	dnaN(14)	hemD(24)	hisD(14)	purE(37)	sucA(19)	thrA(8)	86	Lineage 10	10.1.1_Europe1	256895	256895	256882	256882	5867	1620	1620	1620	155	155	2	2	Susceptible	8	0.012	none	99.9	59.06	99.0432	1963888	243
235	202100515		2021	2021	Yes	France	No travel	France	Europe	Western Europe	Europe	Human	Blood	NA	S. enterica	Paratyphi B	Present	Not available	aroC(2)	dnaN(14)	hemD(24)	hisD(14)	purE(37)	sucA(19)	thrA(8)	86	Lineage 10	10.1.1_Europe1	259997	259997	256882	256882	5867	1620	1620	1620	155	155	2	2	Susceptible	2	0.012	none	99.85	76.94	98.4636	2611764	237
236	201611212		2016	2016		France	Unknown	France or elsewhere	Unknown	Unknown	Unknown	Human	Urine	NA	S. enterica	Paratyphi B	Present	Not available	aroC(2)	dnaN(14)	hemD(24)	hisD(14)	purE(37)	sucA(19)	thrA(8)	86	Lineage 10	10.1.1_Europe1	256882	256882	256882	256882	5867	1620	1620	1620	155	155	2	2	Susceptible			none	99.68	81.31	98.7345	2672728	240
237	3-59	B59-280	1959	1959		Italy	NA	Italy	Europe	Southern Europe	Europe	Unknown		NA	S. enterica	Paratyphi B	Present	Not available	aroC(2)	dnaN(14)	hemD(24)	hisD(14)	purE(37)	sucA(19)	thrA(8)	86	Lineage 10	10.2	261543	261543	261543	261543	261543	1620	1620	1620	155	155	2	2	Susceptible			none	99.05	134.96	98.4263	4476764	357
238	CIP 54.116	B53-1918	1953	1953	Yes	Germany	NA	Germany	Europe	Western Europe	Europe	Human	Blood	NA	S. enterica	Paratyphi B	Present	3aI	aroC(2)	dnaN(14)	hemD(24)	hisD(14)	purE(37)	sucA(19)	thrA(8)	86	Lineage 10	10.2	234056	234056	234056	234056	1857	1620	1620	1620	155	155	2	2				none	99.94	105.08	98.1516	3447988	226
239	10-62	B62-353	1962	1962	Yes	Madagascar	NA	Madagascar	Africa	Eastern Africa	Africa	Human	Blood	NA	S. enterica	Paratyphi B	Present	Taunton	aroC(2)	dnaN(14)	hemD(24)	hisD(14)	purE(37)	sucA(19)	thrA(8)	86	Lineage 10	10.2	261541	261541	261541	261541	1857	1620	1620	1620	155	155	2	2	Susceptible			none	99.93	135.23	98.4036	4635790	239
240	201409601		2014	2014		France	No travel	France	Europe	Western Europe	Europe	Human	Stools	NA	S. enterica	Paratyphi B	Present	Not available	aroC(2)	dnaN(14)	hemD(24)	hisD(14)	purE(37)	sucA(19)	thrA(8)	86	Lineage 10	10.2	341321	341321	341321	341321	1857	1620	1620	1620	155	155	2	2	Susceptible			none	99.94	92.93	97.1588	4272884	261
241	200102771		2001	2001	Yes	France	Madagascar	Madagascar	Africa	Eastern Africa	Africa	Human	Blood	NA	S. enterica	Paratyphi B	Present	Not available	aroC(2)	dnaN(14)	hemD(24)	hisD(14)	purE(37)	sucA(19)	thrA(8)	86	Lineage 10	10.2	261560	261560	261536	261536	1857	1620	1620	1620	155	155	2	2	Susceptible			none	98.92	115.6	98.7179	3991306	258
242	16-66	B66-460	1966	1966	Yes	Germany	NA	Germany	Europe	Western Europe	Europe	Human	Blood	NA	S. enterica	Paratyphi B	Present	Taunton	aroC(2)	dnaN(14)	hemD(24)	hisD(14)	purE(37)	sucA(19)	thrA(8)	86	Lineage 10	10.2	341205	341205	341205	341205	1857	1620	1620	1620	155	155	2	2	Susceptible			none	99.94	78.5	86.6793	4026044	223
243	13-52		1952	1952	Yes	France	NA	France	Europe	Western Europe	Europe	Human	Unknown	NA	S. enterica	Paratyphi B	Present	Not available	aroC(2)	dnaN(14)	hemD(24)	hisD(14)	purE(37)	sucA(19)	thrA(8)	86	Lineage 10	10.2	261547	261547	261547	261547	1857	1620	1620	1620	155	155	2	2	Susceptible			none	99.89	107.8	98.1682	3653520	229
244	16-89	B89-383	1989	1989		France	NA	France	Europe	Western Europe	Europe	Animal	Clams	NA	S. enterica	Paratyphi B	Present	Taunton	aroC(2)	dnaN(14)	hemD(24)	hisD(14)	purE(37)	sucA(19)	thrA(8)	86	Lineage 10	10.2	261533	261533	261533	261533	1857	1620	1620	1620	155	155	2	2	Susceptible			none	98.85	93.2	98.2659	3191268	237
245	95-74	B74-1131	1974	1974		France	NA	France	Europe	Western Europe	Europe	Human	Stools	NA	S. enterica	Paratyphi B	Present	Taunton	aroC(2)	dnaN(14)	hemD(24)	hisD(14)	purE(37)	sucA(19)	thrA(8)	86	Lineage 10	10.2	341258	341258	341258	341258	1857	1620	1620	1620	155	155	2	2				none	99.94	194.38	97.5417	8841752	222
246	80-74	B74-1070	1974	1974	Yes	France	NA	France	Europe	Western Europe	Europe	Human	Stools	NA	S. enterica	Paratyphi B	Present	Taunton	aroC(2)	dnaN(14)	hemD(24)	hisD(14)	purE(37)	sucA(19)	thrA(8)	86	Lineage 10	10.2	341235	341235	341235	341235	1857	1620	1620	1620	155	155	2	2				none	99.91	68.6	94.6649	3229892	228
247	54-67	B67-780	1967	1967	Yes	France	NA	France	Europe	Western Europe	Europe	Human	Blood	NA	S. enterica	Paratyphi B	Present	Taunton	aroC(2)	dnaN(14)	hemD(24)	hisD(14)	purE(37)	sucA(19)	thrA(8)	86	Lineage 10	10.2	341226	341226	341226	261546	1857	1620	1620	1620	155	155	2	2				none	99.94	195.49	97.9087	7520942	236
248	202002437		2020	2020	Yes	France	No travel	France	Europe	Western Europe	Europe	Human	Stools	NA	S. enterica	Paratyphi B	Present	Not available	aroC(2)	dnaN(14)	hemD(24)	hisD(14)	purE(37)	sucA(19)	thrA(8)	86	Lineage 10	10.2	342088	342088	342088	342088	1857	1620	1620	1620	155	155	2	2	STR	4	0.012	none	98.74	146.34	96.9615	4895520	289
249	3-78	B78-93	1978	1978		France	NA	France	Europe	Western Europe	Europe	Environment	River water	Loire river	S. enterica	Paratyphi B	Present	3aI	aroC(2)	dnaN(14)	hemD(24)	hisD(14)	purE(37)	sucA(19)	thrA(8)	86	Lineage 10	10.2	289296	289296	289296	289296	1857	1620	1620	1620	155	155	2	2	Susceptible			none	99.86	218.82	98.8072	7327678	262
250	201703220		2017	2017		France	Unknown	France or elsewhere	Unknown	Unknown	Unknown	Human	Urine	NA	S. enterica	Paratyphi B	Present	Not available	aroC(2)	dnaN(14)	hemD(24)	hisD(14)	purE(37)	sucA(19)	thrA(8)	86	Lineage 10	10.2	256883	256883	256883	256883	1857	1620	1620	1620	155	155	2	2	NAL (CIP)	≥ 256	0.38	gyrA_S83F	99.93	161.13	97.9233	5355044	247
251	46-73	B73-841	1973	1973		France	NA	France	Europe	Western Europe	Europe	Human	Blood	NA	S. enterica	Paratyphi B	Present	Taunton	aroC(2)	dnaN(14)	hemD(24)	hisD(14)	purE(37)	sucA(19)	thrA(8)	86	Lineage 10	10.2	341243	341243	341243	261546	1857	1620	1620	1620	155	155	2	2				none	99.72	119.17	96.8938	4627954	233
252	13-73	B73-415	1973	1973		France	NA	France	Europe	Western Europe	Europe	Human	Blood	NA	S. enterica	Paratyphi B	Present	Taunton	aroC(2)	dnaN(14)	hemD(24)	hisD(14)	purE(1502)	sucA(19)	thrA(8)	10014	Lineage 10	10.2	341274	341274	341274	341274	341274	1620	1620	1620	155	155	2	2				none	99.94	198.01	97.5916	7651022	295
253	117-84	B84-1166	1984	1984	Yes	France	NA	France	Europe	Western Europe	Europe	Environment	Sewage	H√©rault	S. enterica	Paratyphi B	Present	3aI	aroC(2)	dnaN(14)	hemD(24)	hisD(14)	purE(37)	sucA(19)	thrA(8)	86	Lineage 10	10.2	289333	289333	289333	289333	1857	1620	1620	1620	155	155	2	2	Susceptible			none	99.93	151.5	98.6309	5168810	276
254	200-75	B75-2304	1975	1975		France	NA	France	Europe	Western Europe	Europe	Human	Blood	NA	S. enterica	Paratyphi B	Present	Taunton	aroC(2)	dnaN(14)	hemD(24)	hisD(14)	purE(37)	sucA(19)	thrA(8)	86	Lineage 10	10.2	341246	341246	341246	261546	1857	1620	1620	1620	155	155	2	2				none	99.94	80.97	96.5896	3727638	238
255	183-75	B75-1890	1975	1975	Yes	France	Algeria	Algeria	Africa	Northern Africa	Africa	Human	Stools	NA	S. enterica	Paratyphi B	Present	Taunton	aroC(2)	dnaN(14)	hemD(24)	hisD(14)	purE(37)	sucA(19)	thrA(8)	86	Lineage 10	10.2	261563	261563	261563	261546	1857	1620	1620	1620	155	155	2	2	Susceptible			none	99.9	111.04	98.2208	3822032	246
256	62-83	B83-1042	1983	1983	Yes	France	Algeria	Algeria	Africa	Northern Africa	Africa	Human	Blood	NA	S. enterica	Paratyphi B	Present	Taunton	aroC(2)	dnaN(14)	hemD(24)	hisD(14)	purE(37)	sucA(19)	thrA(8)	86	Lineage 10	10.2	341275	341275	341275	341275	1857	1620	1620	1620	155	155	2	2				none	99.94	104.6	96.5617	4814624	250
257	98-73	B73-1177	1973	1973		France	NA	France	Europe	Western Europe	Europe	Human	Blood	NA	S. enterica	Paratyphi B	Present	Taunton	aroC(2)	dnaN(14)	hemD(24)	hisD(14)	purE(37)	sucA(19)	thrA(8)	86	Lineage 10	10.2	341250	341250	341250	261546	1857	1620	1620	1620	155	155	2	2				none	99.94	178.04	96.755	6941902	240
258	36-62	B62-1100	1962	1962	Yes	Algeria	NA	Algeria	Africa	Northern Africa	Africa	Human	Blood	NA	S. enterica	ND:b:1,2	Present	Taunton	aroC(2)	dnaN(14)	hemD(24)	hisD(14)	purE(37)	sucA(19)	thrA(8)	86	Lineage 10	10.2	261546	261546	261546	261546	1857	1620	1620	1620	155	155	2	2	Susceptible			none	99.84	91.68	98.3882	3128932	240
259	SPPI_14		1957	1957	Yes	Russian Federation (St-Petersburg region)	NA	Russian Federation	Europe	Eastern Europe	Europe	Human	Unknown	NA	S. enterica	Paratyphi B	Present	Not available	aroC(2)	dnaN(14)	hemD(24)	hisD(14)	purE(37)	sucA(19)	thrA(8)	86	Lineage 10	10.3	289316	289316	289316	289316	1857	1620	1620	1620	155	155	2	2	Susceptible			none	99.89	277.63	98.0465	9368592	227
260	201704392		2017	2017		France	Iran	Iran	Asia	Southern Asia	Asia	Human	Blood	NA	S. enterica	Paratyphi B	Present	Not available	aroC(2)	dnaN(14)	hemD(24)	hisD(14)	purE(37)	sucA(19)	thrA(8)	86	Lineage 10	10.3	341932	341932	341932	341932	1857	1620	1620	1620	155	155	2	2	Susceptible	4	0.012	none	99.89	141.67	98.4678	4608028	254
261	RKI_15-04639		2015	2015		Germany	Afghanistan	Afghanistan	Asia	Southern Asia	Asia	Human	Stools	NA	S. enterica	Paratyphi B	Present	Not available	aroC(2)	dnaN(14)	hemD(24)	hisD(14)	purE(37)	sucA(19)	thrA(8)	86	Lineage 10	10.3	343726	343726	343726	343726	1857	1620	1620	1620	155	155	2	2				none	99.94	78.52	98.1186	2791368	202
262	1-67	B67-63	1967	1967	Yes	Iran	NA	Iran	Asia	Southern Asia	Asia	Unknown		NA	S. enterica	Paratyphi B	Present	Taunton	aroC(2)	dnaN(14)	hemD(24)	hisD(14)	purE(37)	sucA(19)	thrA(8)	86	Lineage 10	10.3.2_MiddleEast1	261542	261537	261537	261537	1857	1620	1620	1620	155	155	2	2	Susceptible			none	99.89	78.38	91.3464	2911002	237
263	17-75		1975	1975		Iraq	NA	Iraq	Asia	Western Asia	Middle East	Human	Stools	NA	S. enterica	Paratyphi B	Present	Not available	aroC(2)	dnaN(14)	hemD(24)	hisD(14)	purE(37)	sucA(19)	thrA(8)	86	Lineage 10	10.3.2_MiddleEast1	261607	261607	261607	261607	1857	1620	1620	1620	155	155	2	2	Susceptible			none	98.79	103.51	98.4496	3559508	241
264	72-76	B76-1208	1976	1976	Yes	Iraq	NA	Iraq	Asia	Western Asia	Middle East	Human	Stools	NA	S. enterica	Paratyphi B	Present	Taunton	aroC(2)	dnaN(14)	hemD(24)	hisD(14)	purE(37)	sucA(19)	thrA(8)	86	Lineage 10	10.3.2_MiddleEast1	290788	290788	290788	261607	1857	1620	1620	1620	155	155	2	2	Susceptible			none	98.8	239.17	96.1365	8128330	246
265	RKI_16-01948		2016	2016		Germany	Mexico, Costa Rica	Mexico, Costa Rica	America	Central America	America	Human	Unknown	NA	S. enterica	Paratyphi B	Present	Not available	aroC(2)	dnaN(14)	hemD(24)	hisD(14)	purE(37)	sucA(19)	thrA(8)	86	Lineage 10	10.3.2_MiddleEast1	184444	184444	184444	184444	1620	1620	1620	1620	155	155	2	2				none	99.94	103.55	97.9602	4348194	237
266	87-65	B65-1301	1965	1965	Yes	Iran	NA	Iran	Asia	Southern Asia	Asia	Unknown		NA	S. enterica	Paratyphi B	Present	Not available	aroC(2)	dnaN(14)	hemD(24)	hisD(14)	purE(37)	sucA(19)	thrA(8)	86	Lineage 10	10.3.2_MiddleEast1	261574	261574	261574	261574	1620	1620	1620	1620	155	155	2	2	Susceptible			none	99.8	96.73	98.4218	3322740	224
267	4587/84		1984	1984	Yes	Iran	NA	Iran	Asia	Southern Asia	Asia	Unknown		NA	S. enterica	Paratyphi B	Present	Not available	aroC(2)	dnaN(14)	hemD(24)	hisD(14)	purE(37)	sucA(19)	thrA(8)	86	Lineage 10	10.3.2_MiddleEast1	341889	341889	341889	341889	1620	1620	1620	1620	155	155	2	2	Susceptible			none	99.79	77.89	98.4868	2638648	221
268	157269		2015	2015		United Kingdom	Iraq	Iraq	Asia	Western Asia	Middle East	Human	Stools	NA	S. enterica	Paratyphi B	Present	Not available	aroC(2)	dnaN(14)	hemD(24)	hisD(14)	purE(37)	sucA(19)	thrA(8)	86	Lineage 10	10.3.2_MiddleEast1	1620	1620	1620	1620	1620	1620	1620	1620	155	155	2	2				none	99.94	73.88	98.2507	3731190	244
269	201708800		2017	2017		France	Turkey	Turkey	Asia	Western Asia	Middle East	Human	Blood	NA	S. enterica	Paratyphi B	Present	Not available	aroC(2)	dnaN(14)	hemD(24)	hisD(14)	purE(37)	sucA(19)	thrA(8)	86	Lineage 10	10.3.2_MiddleEast1	145069	1620	1620	1620	1620	1620	1620	1620	155	155	2	2	Susceptible	3	0.016	none	99.83	113.81	98.2014	3703262	239
270	652965		2018	2018		United Kingdom	Iraq	Iraq	Asia	Western Asia	Middle East	Human	Blood	NA	S. enterica	Paratyphi B	Present	Not available	aroC(2)	dnaN(14)	hemD(24)	hisD(14)	purE(37)	sucA(19)	thrA(8)	86	Lineage 10	10.3.2_MiddleEast1	145069	1620	1620	1620	1620	1620	1620	1620	155	155	2	2				none	99.94	88.34	97.6291	4335966	259
271	890420		2019	2019		United Kingdom	Iraq	Iraq	Asia	Western Asia	Middle East	Human	Stools	NA	S. enterica	Paratyphi B	Present	Not available	aroC(2)	dnaN(14)	hemD(24)	hisD(14)	purE(37)	sucA(19)	thrA(8)	86	Lineage 10	10.3.2_MiddleEast1	145069	1620	1620	1620	1620	1620	1620	1620	155	155	2	2				none	99.94	82.35	98.0225	3963152	244
272	813384		2019	2019	Yes	United Kingdom	Iraq	Iraq	Asia	Western Asia	Middle East	Human	Blood	NA	S. enterica	Paratyphi B	Present	Not available	aroC(2)	dnaN(14)	hemD(24)	hisD(14)	purE(37)	sucA(19)	thrA(8)	86	Lineage 10	10.3.2_MiddleEast1	145069	1620	1620	1620	1620	1620	1620	1620	155	155	2	2				none	99.94	82.51	97.6565	4002454	249
273	808192		2019	2019		United Kingdom	Iraq	Iraq	Asia	Western Asia	Middle East	Human	Unknown	NA	S. enterica	Paratyphi B	Present	Not available	aroC(2)	dnaN(14)	hemD(24)	hisD(14)	purE(37)	sucA(19)	thrA(8)	86	Lineage 10	10.3.2_MiddleEast1	83935	83935	83935	83935	1620	1620	1620	1620	155	155	2	2				none	99.93	91.68	98.1924	4378926	272
274	436944		2017	2017		United Kingdom	Iraq	Iraq	Asia	Western Asia	Middle East	Human	Stools	NA	S. enterica	Paratyphi B	Present	Not available	aroC(2)	dnaN(14)	hemD(24)	hisD(14)	purE(37)	sucA(19)	thrA(8)	86	Lineage 10	10.3.2_MiddleEast1	83935	83935	83935	83935	1620	1620	1620	1620	155	155	2	2				none	99.93	81.52	97.9512	3921980	284
275	164895		2015	2015		United Kingdom	Iraq	Iraq	Asia	Western Asia	Middle East	Human	Stools	NA	S. enterica	Paratyphi B	Present	Not available	aroC(2)	dnaN(14)	hemD(24)	hisD(14)	purE(37)	sucA(19)	thrA(8)	86	Lineage 10	10.3.2_MiddleEast1	83935	83935	83935	83935	1620	1620	1620	1620	155	155	2	2				none	99.93	59.16	98.1412	3061266	268
276	166379		2015	2015		United Kingdom	Iraq	Iraq	Asia	Western Asia	Middle East	Human	Blood	NA	S. enterica	Paratyphi B	Present	Not available	aroC(2)	dnaN(14)	hemD(24)	hisD(14)	purE(37)	sucA(19)	thrA(8)	86	Lineage 10	10.3.2_MiddleEast1	83935	83935	83935	83935	1620	1620	1620	1620	155	155	2	2				none	99.93	99.14	98.2032	5041968	267
277	182074		2015	2015	Yes	United Kingdom	Iraq	Iraq	Asia	Western Asia	Middle East	Human	Blood	NA	S. enterica	Paratyphi B	Present	Not available	aroC(2)	dnaN(14)	hemD(24)	hisD(14)	purE(37)	sucA(19)	thrA(8)	86	Lineage 10	10.3.2_MiddleEast1	83935	83935	83935	83935	1620	1620	1620	1620	155	155	2	2				none	99.93	64.74	98.2575	3274938	268
278	SMG-20-959		1999	1999		United Kingdom	India	India	Asia	Southern Asia	Asia	Human	Blood	NA	S. enterica	Paratyphi B	Present	Not available	aroC(2)	dnaN(14)	hemD(24)	hisD(14)	purE(37)	sucA(19)	thrA(8)	86	Lineage 10	10.3	234065	234065	234065	234065	1857	1620	1620	1620	155	155	2	2				none	99.94	96.7	97.8593	1773328	255
279	SH16G5113		2016	2016	Yes	China	No travel	China	Asia	Eastern Asia	Asia	Human	Stools	NA	S. enterica	Paratyphi B	Present	Not available	aroC(2)	dnaN(14)	hemD(24)	hisD(14)	purE(37)	sucA(19)	thrA(8)	86	Lineage 10	10.3	301038	301038	301038	301038	301038	1620	1620	1620	155	155	2	2				gyrA_D87Y	99.91	311.2	97.1835	10727110	287
280	SPPI_20110		2020	2020		Russian Federation (Sverdlvosk region)	NA	Russian Federation	Asia	Central Asia	Asia	Human	Unknown	NA	S. enterica	Paratyphi B	Present	Not available	aroC(2)	dnaN(14)	hemD(24)	hisD(14)	purE(37)	sucA(19)	thrA(8)	86	Lineage 10	10.3	289327	289327	289327	289327	289327	1620	1620	1620	155	155	2	2	Susceptible			none	99.92	198.49	98.1577	6708336	270
281	164-75	B75-1812	1975	1975		France	Turkey	Turkey	Asia	Western Asia	Middle East	Human	Blood	NA	S. enterica	Paratyphi B	Present	Dundee	aroC(2)	dnaN(14)	hemD(24)	hisD(14)	purE(37)	sucA(19)	thrA(8)	86	Lineage 10	10.3.3_Turkey2	261611	261611	261611	234066	37833	1620	1620	1620	155	155	2	2	Susceptible			none	99.91	108.36	98.187	3661296	233
282	122-74	B74-1534	1974	1974	Yes	France	Turkey	Turkey	Asia	Western Asia	Middle East	Human	Bile	NA	S. enterica	Paratyphi B	Present	Taunton	aroC(2)	dnaN(14)	hemD(24)	hisD(14)	purE(37)	sucA(19)	thrA(8)	86	Lineage 10	10.3.3_Turkey2	341231	341231	261611	234066	37833	1620	1620	1620	155	155	2	2				none	99.21	92.88	97.831	3559736	243
283	3661/82		1982	1982		Turkey	NA	Turkey	Asia	Western Asia	Middle East	Human	Stools	NA	S. enterica	Paratyphi B	Present	Not available	aroC(2)	dnaN(14)	hemD(24)	hisD(14)	purE(37)	sucA(19)	thrA(8)	86	Lineage 10	10.3.3_Turkey2	341915	341915	341915	341915	37833	1620	1620	1620	155	155	2	2	Susceptible			none	99.92	157.09	98.1484	5205280	238
284	SMG-20-961		2000	2000		United Kingdom	Turkey	Turkey	Asia	Western Asia	Middle East	Human	Stools	NA	S. enterica	Paratyphi B	Present	Not available	aroC(2)	dnaN(14)	hemD(24)	hisD(14)	purE(37)	sucA(19)	thrA(8)	86	Lineage 10	10.3.3_Turkey2	234075	234075	234066	234066	37833	1620	1620	1620	155	155	2	2				none	99.72	97.97	97.7595	1796154	255
285	SMG-20-954		2000	2000	Yes	United Kingdom	Turkey	Turkey	Asia	Western Asia	Middle East	Human	Stools	NA	S. enterica	Paratyphi B	Present	Taunton	aroC(2)	dnaN(14)	hemD(24)	hisD(14)	purE(37)	sucA(19)	thrA(8)	86	Lineage 10	10.3.3_Turkey2	234066	234066	234066	234066	37833	1620	1620	1620	155	155	2	2				none	99.93	91.88	97.3457	1703616	259
286	617004		2018	2018		United Kingdom	Turkey	Turkey	Asia	Western Asia	Middle East	Human	Unknown	NA	S. enterica	Paratyphi B	Present	Not available	aroC(2)	dnaN(14)	hemD(24)	hisD(14)	purE(37)	sucA(19)	thrA(8)	86	Lineage 10	10.3.3_Turkey2	146565	146565	146565	146565	37833	1620	1620	1620	155	155	2	2				none	99.93	71.91	98.2427	3460018	283
287	201606982		2016	2016	Yes	France	Turkey	Turkey	Asia	Western Asia	Middle East	Human	Blood	NA	S. enterica	Paratyphi B	Present	Not available	aroC(2)	dnaN(14)	hemD(24)	hisD(14)	purE(37)	sucA(19)	thrA(8)	86	Lineage 10	10.3.3_Turkey2	341880	341880	341880	146565	37833	1620	1620	1620	155	155	2	2	Susceptible			none	99.76	91.34	98.4776	3024884	274
288	00-6417	B00-6417	2000	2000	Yes	France	Turkey	Turkey	Asia	Western Asia	Middle East	Human	Stools	NA	S. enterica	Paratyphi B	Present	Dundee	aroC(2)	dnaN(14)	hemD(24)	hisD(14)	purE(37)	sucA(19)	thrA(8)	86	Lineage 10	10.3.3_Turkey2	341319	341319	341319	341319	37833	1620	1620	1620	155	155	2	2				none	99.88	71.52	94.6473	3359458	268
289	SMG-20-973		1990	1990		United Kingdom	Turkey	Turkey	Asia	Western Asia	Middle East	Human	Blood	NA	S. enterica	Paratyphi B	Present	Not available	aroC(2)	dnaN(14)	hemD(24)	hisD(14)	purE(37)	sucA(19)	thrA(8)	86	Lineage 10	10.3.3_Turkey2	234071	234071	234071	234071	37833	1620	1620	1620	155	155	2	2				none	99.91	81.75	98.1389	1522848	254
290	01-7995		2001	2001		France	Turkey	Turkey	Asia	Western Asia	Middle East	Human	Stools	NA	S. enterica	Paratyphi B	Present	Dundee	aroC(2)	dnaN(14)	hemD(24)	hisD(14)	purE(37)	sucA(19)	thrA(8)	86	Lineage 10	10.3.3_Turkey2	37833	37833	37833	37833	37833	1620	1620	1620	155	155	2	2	AMP CRO TMP			blaCTX-M-3, dfrA14	99.93	71.81	75.7032	4898202	277
291	36-74		1974	1974	Yes	Iraq	NA	Iraq	Asia	Western Asia	Middle East	Human	Blood	NA	S. enterica	Paratyphi B	Present	Not available	aroC(2)	dnaN(14)	hemD(24)	hisD(14)	purE(37)	sucA(19)	thrA(8)	86	Lineage 10	10.3.1_SouthAsia1	261545	261545	261545	261545	37773	1620	1620	1620	155	155	2	2	Susceptible			none	99.88	87.42	98.85	3018780	260
292	SMG-19-211		2019	2019	Yes	United Kingdom	Pakistan	Pakistan	Asia	Southern Asia	Asia	Human	Blood	NA	S. enterica	Paratyphi B	Present	Not available	aroC(2)	dnaN(14)	hemD(24)	hisD(14)	purE(37)	sucA(19)	thrA(8)	86	Lineage 10	10.3.1_SouthAsia1	167004	145414	145414	145414	37773	1620	1620	1620	155	155	2	2				gyrA_D87N	99.94	90.36	98.0418	2239556	260
293	475848		2018	2018		United Kingdom	Pakistan	Pakistan	Asia	Southern Asia	Asia	Human	Blood	NA	S. enterica	Paratyphi B	Present	Not available	aroC(2)	dnaN(14)	hemD(24)	hisD(14)	purE(37)	sucA(19)	thrA(8)	86	Lineage 10	10.3.1_SouthAsia1	145414	145414	145414	145414	37773	1620	1620	1620	155	155	2	2				gyrA_D87N	99.94	42.02	97.1865	2054878	259
294	RKI_04-00630		2004	2004	Yes	Germany	Afghanistan	Afghanistan	Asia	Southern Asia	Asia	Human	Stools	NA	S. enterica	Paratyphi B	Present	Not available	aroC(2)	dnaN(14)	hemD(24)	hisD(14)	purE(37)	sucA(19)	thrA(8)	86	Lineage 10	10.3.1_SouthAsia1	343725	343725	343725	83939	37773	1620	1620	1620	155	155	2	2				none	99.95	106.56	95.8035	4191998	204
295	201543		2015	2015	Yes	United Kingdom	Pakistan	Pakistan	Asia	Southern Asia	Asia	Human	Blood	NA	S. enterica	Paratyphi B	Present	Not available	aroC(2)	dnaN(14)	hemD(24)	hisD(14)	purE(37)	sucA(19)	thrA(8)	86	Lineage 10	10.3.1_SouthAsia1	83939	83939	83939	83939	37773	1620	1620	1620	155	155	2	2				none	99.9	62.45	98.2449	3158046	252
296	248546		2016	2016		United Kingdom	Pakistan	Pakistan	Asia	Southern Asia	Asia	Human	Blood	NA	S. enterica	Paratyphi B	Present	Not available	aroC(2)	dnaN(14)	hemD(24)	hisD(14)	purE(37)	sucA(19)	thrA(8)	86	Lineage 10	10.3.1_SouthAsia1	83952	83939	83939	83939	37773	1620	1620	1620	155	155	2	2				none	99.94	77.58	98.2517	4454992	253
297	19-88	B88-387	1988	1988	Yes	France	India	India	Asia	Southern Asia	Asia	Human	Blood	NA	S. enterica	Paratyphi B	Present	RDNC	aroC(2)	dnaN(14)	hemD(24)	hisD(14)	purE(37)	sucA(19)	thrA(8)	86	Lineage 10	10.3.1_SouthAsia1	261567	261567	261567	261567	37773	1620	1620	1620	155	155	2	2	Susceptible			none	99.91	125.98	98.1748	4323912	265
298	SMG-20-952		1992	1992		United Kingdom	Pakistan	Pakistan	Asia	Southern Asia	Asia	Human	Stools	NA	S. enterica	Paratyphi B	Present	Taunton	aroC(2)	dnaN(14)	hemD(24)	hisD(14)	purE(37)	sucA(19)	thrA(8)	86	Lineage 10	10.3.1_SouthAsia1	234063	234063	234063	234063	37773	1620	1620	1620	155	155	2	2				none	99.94	79.13	96.4607	1464906	264
299	SMG-20-967		1996	1996		United Kingdom	Pakistan	Pakistan	Asia	Southern Asia	Asia	Human	Stools	NA	S. enterica	Paratyphi B	Present	Taunton	aroC(2)	dnaN(14)	hemD(24)	hisD(14)	purE(37)	sucA(19)	thrA(8)	86	Lineage 10	10.3.1_SouthAsia1	234067	234067	234067	234067	37773	1620	1620	1620	155	155	2	2				none	99.07	93.79	98.1143	1808656	268
300	SMG-20-966		1998	1998	Yes	United Kingdom	Pakistan	Pakistan	Asia	Southern Asia	Asia	Human	Stools	NA	S. enterica	Paratyphi B	Present	Taunton	aroC(2)	dnaN(14)	hemD(1014)	hisD(14)	purE(37)	sucA(19)	thrA(8)	7999	Lineage 10	10.3.1_SouthAsia1	234074	234074	234074	234074	37773	1620	1620	1620	155	155	2	2				None	99.94	77.76	97.1731	1427206	274
301	201002201		2010	2010		France	India	India	Asia	Southern Asia	Asia	Human	Stools	NA	S. enterica	Paratyphi B	Present	Not available	aroC(2)	dnaN(14)	hemD(24)	hisD(14)	purE(37)	sucA(19)	thrA(8)	86	Lineage 10	10.3.1_SouthAsia1	341929	341929	341929	261569	37773	1620	1620	1620	155	155	2	2	(CIP)	12	0.094	gyrB_S464F	99.93	181.97	98.9433	6069860	285
302	201301733		2013	2013	Yes	France	India	India	Asia	Southern Asia	Asia	Human	Blood	NA	S. enterica	Paratyphi B	Present	Not available	aroC(2)	dnaN(14)	hemD(24)	hisD(14)	purE(37)	sucA(19)	thrA(8)	86	Lineage 10	10.3.1_SouthAsia1	341289	341289	341289	261569	37773	1620	1620	1620	155	155	2	2	Susceptible	12	0.064	gyrB_S464F	99.94	40.92	90.464	2013144	296
303	200602696		2006	2006	Yes	France	India	India	Asia	Southern Asia	Asia	Human	Stools	NA	S. enterica	Paratyphi B	Present	Not available	aroC(2)	dnaN(14)	hemD(24)	hisD(14)	purE(37)	sucA(19)	thrA(8)	86	Lineage 10	10.3.1_SouthAsia1	261569	261569	261569	261569	37773	1620	1620	1620	155	155	2	2	NAL	24	0.064	gyrB_S464F	99.88	104.63	99.1143	3546882	288
304	200608191		2006	2006		France	India	India	Asia	Southern Asia	Asia	Human	Stools	NA	S. enterica	Paratyphi B	Present	Not available	aroC(2)	dnaN(14)	hemD(24)	hisD(14)	purE(37)	sucA(19)	thrA(8)	86	Lineage 10	10.3.1_SouthAsia1	261614	261614	261614	261569	37773	1620	1620	1620	155	155	2	2	NAL (CIP)	≥ 256	0.19	gyrA_D87N, gyrB_S464F	99.91	99.09	99.0901	3352070	283
305	SPPI_8		1956	1956	Yes	Russian Federation (Northwestern)	NA	Russian Federation	Europe	Eastern Europe	Europe	Human	Unknown	NA	S. enterica	Paratyphi B	Present	Not available	aroC(2)	dnaN(14)	hemD(24)	hisD(14)	purE(37)	sucA(19)	thrA(8)	86	Lineage 10	10.3	289351	289351	289319	289319	1857	1620	1620	1620	155	155	2	2	Susceptible			none	99.92	139.06	97.2269	4855388	221
306	SPPI_9		1957	1957		Russian Federation (St-Petersburg)	NA	Russian Federation	Europe	Eastern Europe	Europe	Human	Unknown	NA	S. enterica	Paratyphi B	Present	Not available	aroC(2)	dnaN(14)	hemD(24)	hisD(14)	purE(37)	sucA(19)	thrA(8)	86	Lineage 10	10.3	289319	289319	289319	289319	1857	1620	1620	1620	155	155	2	2	Susceptible			none	99.94	175.02	97.1623	6058888	213
307	73-82	B82-967	1982	1982	Yes	France	Uzbekhistan	Uzbekhistan	Asia	Central Asia	Asia	Human	Blood	NA	S. enterica	Paratyphi B	Present	Taunton	aroC(2)	dnaN(14)	hemD(24)	hisD(14)	purE(37)	sucA(19)	thrA(8)	86	Lineage 10	10.3	341263	341263	341263	341263	234073	1620	1620	1620	155	155	2	2				none	99.94	78.55	96.8049	3607312	254
308	SMG-20-955		1991	1991	Yes	United Kingdom	Central Asia	ND (Central Asia)	Asia	Central Asia	Asia	Human	Stools	NA	S. enterica	Paratyphi B	Present	Not available	aroC(2)	dnaN(14)	hemD(24)	hisD(14)	purE(37)	sucA(19)	thrA(8)	86	Lineage 10	10.3	234073	234073	234073	234073	234073	1620	1620	1620	155	155	2	2				none	99.94	130.13	97.0335	2433592	269
309	43-84	B84-354	1984	1984	Yes	France	Algeria	Algeria	Africa	Northern Africa	Africa	Human	Bile	NA	S. enterica	Paratyphi B	Present	Taunton	aroC(2)	dnaN(14)	hemD(24)	hisD(14)	purE(37)	sucA(19)	thrA(8)	86	Lineage 10	10.3.9_NorthAfrica3	261549	261549	261549	261549	4709	1620	1620	1620	155	155	2	2	STR			none	99.87	128.29	98.6811	4349232	270
310	86-66	B66-1141	1966	1966	Yes	Morocco	NA	Morocco	Africa	Northern Africa	Africa	Human	Stools	NA	S. enterica	Paratyphi B	Present	Taunton	aroC(2)	dnaN(14)	hemD(24)	hisD(14)	purE(37)	sucA(19)	thrA(8)	86	Lineage 10	10.3.9_NorthAfrica3	341208	341208	341208	4709	4709	1620	1620	1620	155	155	2	2				none	99.94	185.01	97.8564	7127296	253
311	9-56		1956	1956		Morocco	NA	Morocco	Africa	Northern Africa	Africa	Human	Stools	NA	S. enterica	Paratyphi B	Present	Not available	aroC(2)	dnaN(14)	hemD(24)	hisD(14)	purE(37)	sucA(19)	thrA(8)	86	Lineage 10	10.3.9_NorthAfrica3	341183	341183	341183	4709	4709	1620	1620	1620	155	155	2	2	Susceptible			none	99.94	194.59	95.3697	7698728	256
312	B97-7624		1997	1997	Yes	France	Morocco	Morocco	Africa	Northern Africa	Africa	Human	Stools	NA	S. enterica	Paratyphi B	Present	Dundee	aroC(2)	dnaN(14)	hemD(24)	hisD(14)	purE(37)	sucA(19)	thrA(8)	86	Lineage 10	10.3.9_NorthAfrica3	261608	261608	261608	261608	4709	1620	1620	1620	155	155	2	2	Susceptible			none	99.07	112.14	98.4369	3735156	265
313	60-83	B83-1040	1983	1983	Yes	France	Morocco	Morocco	Africa	Northern Africa	Africa	Human	Blood	NA	S. enterica	Paratyphi B	Present	3aI	aroC(2)	dnaN(14)	hemD(24)	hisD(14)	purE(37)	sucA(19)	thrA(8)	86	Lineage 10	10.3.9_NorthAfrica3	341271	341271	341271	341271	4709	1620	1620	1620	155	155	2	2				none	99.18	135.68	96.7706	6197780	297
314	SARA46	DMS 3254/7/81	1981	1981		Northern Europe	NA	ND (Northern Europe)	Europe	Northern Europe	Europe	Human	Unknown	NA	S. enterica	Paratyphi B	Present	Not available	aroC(2)	dnaN(14)	hemD(24)	hisD(14)	purE(37)	sucA(19)	thrA(8)	86	Lineage 10	10.3.9_NorthAfrica3	43893	43893	4709	4709	4709	1620	1620	1620	155	155	2	2				none	99.94	71.91	98.219	3597472	263
315	B1655		1940s	1943		United Kingdom	NA	United Kingdom	Europe	Northern Europe	Europe	Unknown		NA	S. enterica	Paratyphi B	Present	Taunton	aroC(2)	dnaN(14)	hemD(24)	hisD(14)	purE(37)	sucA(19)	thrA(8)	86	Lineage 10	10.3	341895	341895	341895	341895	1857	1620	1620	1620	155	155	2	2	Susceptible			none	99.97	155.04	98.0942	5166446	228
316	141-76	B76-1571	1976	1976	Yes	France	Italy	Italy	Europe	Southern Europe	Europe	Human	Blood	NA	S. enterica	Paratyphi B	Present	Taunton	aroC(2)	dnaN(14)	hemD(24)	hisD(14)	purE(1360)	sucA(19)	thrA(8)	8932	Lineage 10	10.3	289332	289332	289332	289332	1857	1620	1620	1620	155	155	2	2	Susceptible			none	99.78	140.12	97.9395	4697422	246
317	78-2556	78-2566	1978	1978		United States (New Hampshire)	NA	United States of America	America	North America	America	Human	Stools	NA	S. enterica	Paratyphi B	Present	Not available	aroC(2)	dnaN(14)	hemD(24)	hisD(14)	purE(37)	sucA(19)	thrA(8)	86	Lineage 10	10.3	277454	277454	277454	277454	1857	1620	1620	1620	155	155	2	2	Susceptible			none	99.94	192.26	98.161	6265002	237
318	FTP 81		1986	1986		Chile	No travel	Chile	America	South America	America	Human	Unknown	NA	S. enterica	Paratyphi B	Present	Not available	aroC(2)	dnaN(14)	hemD(24)	hisD(14)	purE(37)	sucA(19)	thrA(1566)	10005	Lineage 10	10.3.4_Chile2	340862	340862	340862	277451	214280	1620	1620	1620	155	155	2	2				none	99.92	156.26	97.9536	8048658	244
319	JSV 7371		1983	1983	Yes	Chile	No travel	Chile	America	South America	America	Human	Unknown	NA	S. enterica	Paratyphi B	Present	Not available	aroC(2)	dnaN(14)	hemD(24)	hisD(14)	purE(37)	sucA(19)	thrA(8)	86	Lineage 10	10.3.4_Chile2	340858	340858	340858	277451	214280	1620	1620	1620	155	155	2	2				none	99.93	188.31	98.1523	9287244	241
320	78-3169		1978	1978		United States (South Dakota)	NA	United States of America	America	North America	America	Human	Stools	NA	S. enterica	Paratyphi B	Present	Not available	aroC(2)	dnaN(14)	hemD(24)	hisD(14)	purE(37)	sucA(19)	thrA(8)	86	Lineage 10	10.3.4_Chile2	277453	277453	277451	277451	214280	1620	1620	1620	155	155	2	2	Susceptible			none	99.91	147.51	98.4953	5092428	237
321	78-3168		1978	1978		United States (South Dakota)	NA	United States of America	America	North America	America	Human	Stools	NA	S. enterica	Paratyphi B	Present	Not available	aroC(2)	dnaN(14)	hemD(24)	hisD(14)	purE(37)	sucA(19)	thrA(8)	86	Lineage 10	10.3.4_Chile2	277456	277456	277456	277456	214280	1620	1620	1620	155	155	2	2	Susceptible			none	99.78	95.9	98.7042	3361642	247
322	ELB 6380		1983	1983		Chile	No travel	Chile	America	South America	America	Human	Unknown	NA	S. enterica	Paratyphi B	Present	Not available	aroC(2)	dnaN(14)	hemD(24)	hisD(14)	purE(37)	sucA(19)	thrA(8)	86	Lineage 10	10.3.4_Chile2	340853	340853	340853	277451	214280	1620	1620	1620	155	155	2	2				none	99.93	200.21	98.1872	9850778	248
323	MUG 6222		1983	1983	Yes	Chile	No travel	Chile	America	South America	America	Human	Unknown	NA	S. enterica	Paratyphi B	Present	Not available	aroC(2)	dnaN(14)	hemD(24)	hisD(14)	purE(37)	sucA(19)	thrA(8)	86	Lineage 10	10.3.4_Chile2	340864	340864	340864	277451	214280	1620	1620	1620	155	155	2	2				none	99.91	111.18	97.5701	5604286	240
324	CLA-113-7		2019	2019		Chile	NA	Chile	America	South America	America	Environment	Creek water	NA	S. enterica	Paratyphi B	Present	Not available	aroC(2)	dnaN(14)	hemD(24)	hisD(14)	purE(37)	sucA(19)	thrA(8)	86	Lineage 10	10.3.4_Chile2	214324	214324	214280	214280	214280	1620	1620	1620	155	155	2	2				none	99.9	143.62	97.4828	4694536	251
325	CLA-143-9		2019	2019		Chile	NA	Chile	America	South America	America	Environment	River water	NA	S. enterica	Paratyphi B	Present	Not available	aroC(2)	dnaN(14)	hemD(24)	hisD(14)	purE(37)	sucA(19)	thrA(8)	86	Lineage 10	10.3.4_Chile2	214280	214280	214280	214280	214280	1620	1620	1620	155	155	2	2				none	99.91	123.03	97.3457	4008224	250
326	CLA-53-1		2019	2019	Yes	Chile	NA	Chile	America	South America	America	Environment	Creek water	NA	S. enterica	Paratyphi B	Present	Not available	aroC(2)	dnaN(14)	hemD(24)	hisD(14)	purE(37)	sucA(19)	thrA(8)	86	Lineage 10	10.3.4_Chile2	214280	214280	214280	214280	214280	1620	1620	1620	155	155	2	2				none	99.91	53.63	98.0638	1100250	243
327	CLA-113-4		2019	2019	Yes	Chile	NA	Chile	America	South America	America	Environment	Creek water	NA	S. enterica	Paratyphi B	Present	Not available	aroC(2)	dnaN(14)	hemD(24)	hisD(14)	purE(37)	sucA(19)	thrA(8)	86	Lineage 10	10.3.4_Chile2	214280	214280	214280	214280	214280	1620	1620	1620	155	155	2	2				none	99.84	91.44	97.396	2983332	250
328	SPPI_28		1958	1958	Yes	Russian Federation (St-Petersburg region)	NA	Russian Federation	Europe	Eastern Europe	Europe	Human	Unknown	NA	S. enterica	Paratyphi B	Present	Not available	aroC(2)	dnaN(14)	hemD(24)	hisD(14)	purE(37)	sucA(19)	thrA(8)	86	Lineage 10	10.3	289313	289313	289313	289313	1857	1620	1620	1620	155	155	2	2	Susceptible			none	99.93	202.86	98.0214	6830422	227
329	69-0690		1969	1969		United States (New Jersey)	NA	United States of America	America	North America	America	Environment	water	NA	S. enterica	Paratyphi B	Present	Not available	aroC(2)	dnaN(14)	hemD(24)	hisD(14)	purE(37)	sucA(19)	thrA(8)	86	Lineage 10	10.3	277447	277447	277447	277447	1857	1620	1620	1620	155	155	2	2	Susceptible			none	99.93	164.97	98.4665	5616776	242
330	70-65	B65-1304	1965	1965	Yes	Romania	NA	Romania	Europe	Eastern Europe	Europe	Human	Stools	NA	S. enterica	Paratyphi B	Present	Beccles	aroC(2)	dnaN(14)	hemD(24)	hisD(14)	purE(37)	sucA(19)	thrA(8)	86	Lineage 10	10.3	341194	341194	341194	341194	1857	1620	1620	1620	155	155	2	2	Susceptible			none	99.86	197.96	97.9065	7623582	260
331	CIP 54.113	B53-1848	1953	1953	Yes	Austria	NA	Austria	Europe	Western Europe	Europe	Unknown		NA	S. enterica	Paratyphi B	Present	Taunton	aroC(2)	dnaN(14)	hemD(24)	hisD(14)	purE(37)	sucA(19)	thrA(8)	86	Lineage 10	10.3	234053	234053	234053	234053	1857	1620	1620	1620	155	155	2	2				none	99.87	82.31	97.085	2791102	203
332	13839		2014	2014	Yes	United Kingdom	Peru	Peru	America	South America	America	Human	Blood	NA	S. enterica	Paratyphi B	Present	Taunton	aroC(2)	dnaN(14)	hemD(24)	hisD(14)	purE(37)	sucA(19)	thrA(8)	86	Lineage 10	10.3.6_SouthAmerica	7157	7157	7157	7092	1857	1620	1620	1620	155	155	2	2				none	99.08	58.11	98.3864	2928306	247
333	201006450		2010	2010		France	Peru	Peru	America	South America	America	Human	Stools	NA	S. enterica	Paratyphi B	Present	Not available	aroC(2)	dnaN(14)	hemD(24)	hisD(14)	purE(37)	sucA(19)	thrA(8)	86	Lineage 10	10.3.6_SouthAmerica	341320	341320	341320	341320	1857	1620	1620	1620	155	155	2	2	Susceptible	4	0.012	none	99.91	90.01	90.5623	4395130	241
334	44_PB-J		2008	2008		Spain	NA	Spain	Europe	Southern Europe	Europe	Human	Blood	NA	S. enterica	Paratyphi B	Present	Not available	aroC(2)	dnaN(14)	hemD(24)	hisD(14)	purE(37)	sucA(19)	thrA(8)	86	Lineage 10	10.3.6_SouthAmerica	32225	32225	32225	32225	1857	1620	1620	1620	155	155	2	2				gyrA_D87G	99.94	138.06	97.7203	7325878	251
335	Burnett-SPE70		2008	2008		Peru	NA	Peru	America	South America	America	Human	Blood	NA	S. enterica	Paratyphi B	Present	Not available	aroC(2)	dnaN(14)	hemD(24)	hisD(14)	purE(37)	sucA(19)	thrA(8)	86	Lineage 10	10.3.6_SouthAmerica	187670	187670	187670	32225	1857	1620	1620	1620	155	155	2	2				none	99.77	110.61	98.3567	2289024	232
336	04-6017		2004	2004	Yes	France	Peru	Peru	America	South America	America	Human	Blood	NA	S. enterica	Paratyphi B	Present	Not available	aroC(2)	dnaN(14)	hemD(24)	hisD(14)	purE(37)	sucA(19)	thrA(8)	86	Lineage 10	10.3.6_SouthAmerica	37834	37834	37834	32225	1857	1620	1620	1620	155	155	2	2	Susceptible			none	99.95	94.29	97.8944	4900680	242
337	383937		2017	2017		United Kingdom	Peru	Peru	America	South America	America	Human	Stools	NA	S. enterica	Paratyphi B	Present	Not available	aroC(2)	dnaN(14)	hemD(24)	hisD(14)	purE(37)	sucA(19)	thrA(8)	86	Lineage 10	10.3.6_SouthAmerica	122744	54510	54510	32225	1857	1620	1620	1620	155	155	2	2				none	99.66	77.08	98.3306	4025526	235
338	201608990		2016	2016		France	Peru	Peru	America	South America	America	Human	Stools	NA	S. enterica	Paratyphi B	Present	Not available	aroC(2)	dnaN(14)	hemD(24)	hisD(14)	purE(37)	sucA(19)	thrA(8)	86	Lineage 10	10.3.6_SouthAmerica	54510	54510	54510	32225	1857	1620	1620	1620	155	155	2	2	Susceptible	6	0.012	none	99.92	105.86	98.3735	3617074	235
339	3766/82	B82-869	1980	1980		Peru	NA	Peru	America	South America	America	Human	Blood	NA	S. enterica	Paratyphi B	Present	Taunton	aroC(2)	dnaN(14)	hemD(24)	hisD(14)	purE(37)	sucA(19)	thrA(8)	86	Lineage 10	10.3.6_SouthAmerica	341903	341903	341903	32225	1857	1620	1620	1620	155	155	2	2	Susceptible			none	99.97	138.57	98.2015	4595112	226
340	127431		2015	2015		United Kingdom	Bolivia	Bolivia	America	South America	America	Human	Blood	NA	S. enterica	Paratyphi B	Present	Not available	aroC(2)	dnaN(14)	hemD(24)	hisD(14)	purE(37)	sucA(19)	thrA(8)	86	Lineage 10	10.3.6_SouthAmerica	84013	84013	84013	32225	1857	1620	1620	1620	155	155	2	2				none	99.94	74.8	98.3152	3731180	255
341	201809295		2018	2018		France	Peru	Peru	America	South America	America	Human	Blood	NA	S. enterica	Paratyphi B	Present	Not available	aroC(2)	dnaN(14)	hemD(24)	hisD(14)	purE(37)	sucA(19)	thrA(8)	86	Lineage 10	10.3.6_SouthAmerica	341946	60784	60784	32225	1857	1620	1620	1620	155	155	2	2	NAL (CIP)	≥ 256	0.19	gyrA_S83F	99.93	150.06	98.3614	4962392	248
342	201609017		2016	2016	Yes	France	Peru	Peru	America	South America	America	Human	Stools	NA	S. enterica	Paratyphi B	Present	Not available	aroC(2)	dnaN(14)	hemD(24)	hisD(14)	purE(37)	sucA(19)	thrA(8)	86	Lineage 10	10.3.6_SouthAmerica	60784	60784	60784	32225	1857	1620	1620	1620	155	155	2	2	NAL (CIP)	≥ 256	0.19	gyrA_S83F	99.89	141.14	98.5593	4775292	244
343	792595		2019	2019		United Kingdom	Peru	Peru	America	South America	America	Human	Stools	NA	S. enterica	Paratyphi B	Present	Not available	aroC(2)	dnaN(14)	hemD(24)	hisD(14)	purE(37)	sucA(19)	thrA(8)	86	Lineage 10	10.3.6_SouthAmerica	199269	60784	60784	32225	1857	1620	1620	1620	155	155	2	2				gyrA_S83F	99.93	80.98	97.6637	3930312	270
344	200705319		2007	2007	Yes	France	Peru	Peru	America	South America	America	Human	Stools	NA	S. enterica	Paratyphi B	Present	Not available	aroC(2)	dnaN(14)	hemD(24)	hisD(14)	purE(37)	sucA(19)	thrA(8)	86	Lineage 10	10.3.6_SouthAmerica	261582	261582	261582	261573	261573	1620	1620	1620	155	155	2	2	Susceptible			none	99.49	140.5	98.5311	4711434	256
345	1125477		2004	2004	Yes	United Kingdom	Peru	Peru	America	South America	America	Human	Stools	NA	S. enterica	Paratyphi B	Present	Taunton	aroC(2)	dnaN(14)	hemD(24)	hisD(14)	purE(37)	sucA(19)	thrA(8)	86	Lineage 10	10.3.6_SouthAmerica	262192	262192	262192	262192	1857	1620	1620	1620	155	155	2	2				none	99	110.88	98.0475	5168172	244
346	SMG-20-989		2015	2015		United Kingdom	Brazil, Peru, Mexico	Brazil, Peru, Mexico	America	South America	America	Human	Stools	NA	S. enterica	Paratyphi B	Present	Not available	aroC(2)	dnaN(14)	hemD(24)	hisD(14)	purE(37)	sucA(19)	thrA(8)	86	Lineage 10	10.3.6_SouthAmerica	234289	234289	26545	26545	1857	1620	1620	1620	155	155	2	2				none	98.89	49.95	98.3735	917158	226
347	68678		2014	2014		United Kingdom	Peru	Peru	America	South America	America	Human	Stools	NA	S. enterica	Paratyphi B	Present	Taunton	aroC(2)	dnaN(14)	hemD(24)	hisD(14)	purE(37)	sucA(19)	thrA(8)	86	Lineage 10	10.3.6_SouthAmerica	26545	26545	26545	26545	1857	1620	1620	1620	155	155	2	2				none	98.9	64.33	96.4114	3289922	237
348	723633		2019	2019	Yes	United Kingdom	Peru	Peru	America	South America	America	Human	Blood	NA	S. enterica	Paratyphi B	Present	Not available	aroC(2)	dnaN(14)	hemD(24)	hisD(14)	purE(37)	sucA(19)	thrA(8)	86	Lineage 10	10.3.6_SouthAmerica	26545	26545	26545	26545	1857	1620	1620	1620	155	155	2	2				none	98.9	74.84	97.9494	3563554	255
349	163226		2015	2015		United Kingdom	Peru	Peru	America	South America	America	Human	Stools	NA	S. enterica	Paratyphi B	Present	Not available	aroC(2)	dnaN(14)	hemD(24)	hisD(14)	purE(37)	sucA(19)	thrA(8)	86	Lineage 10	10.3.6_SouthAmerica	26545	26545	26545	26545	1857	1620	1620	1620	155	155	2	2				gyrA_S83F	98.9	59	98.1799	2961618	249
350	RKI_16-00161		2016	2016		Germany	Peru	Peru	America	South America	America	Human	Stools	NA	S. enterica	Paratyphi B	Present	Not available	aroC(2)	dnaN(14)	hemD(24)	hisD(14)	purE(37)	sucA(19)	thrA(8)	86	Lineage 10	10.3.6_SouthAmerica	26545	26545	26545	26545	1857	1620	1620	1620	155	155	2	2				gyrA_S83F	98.9	68.84	97.8877	1563188	239
351	916942		2020	2020		United Kingdom	South America	ND (South America)	America	South America	America	Human	Blood	NA	S. enterica	Paratyphi B	Present	Not available	aroC(2)	dnaN(14)	hemD(24)	hisD(14)	purE(37)	sucA(19)	thrA(8)	86	Lineage 10	10.3.6_SouthAmerica	135240	135240	135240	26545	1857	1620	1620	1620	155	155	2	2				gyrA_S83F	98.89	90.72	98.327	4369702	264
352	91-67	B67-1091	1967	1967		Peru	NA	Peru	America	South America	America	Human	Stools	NA	S. enterica	Paratyphi B	Present	Taunton	aroC(2)	dnaN(14)	hemD(24)	hisD(14)	purE(37)	sucA(19)	thrA(8)	86	Lineage 10	10.3.6_SouthAmerica	341221	341221	341221	341221	1857	1620	1620	1620	155	155	2	2				none	99.93	150.82	97.7241	5813894	246
353	89-67	B67-1089	1967	1967		Peru	NA	Peru	America	South America	America	Human	Stools	NA	S. enterica	Paratyphi B	Present	Taunton	aroC(2)	dnaN(14)	hemD(24)	hisD(14)	purE(37)	sucA(19)	thrA(8)	86	Lineage 10	10.3.6_SouthAmerica	341223	341223	341223	341221	1857	1620	1620	1620	155	155	2	2				none	99.93	89.77	96.6273	4126420	249
354	87-67	B67-1087	1967	1967		Peru	NA	Peru	America	South America	America	Human	Stools	NA	S. enterica	Paratyphi B	Present	Taunton	aroC(2)	dnaN(14)	hemD(24)	hisD(14)	purE(37)	sucA(19)	thrA(8)	86	Lineage 10	10.3.6_SouthAmerica	341222	341221	341221	341221	1857	1620	1620	1620	155	155	2	2				none	99.94	194.04	97.813	7474232	247
355	88-67	B67-1088	1967	1967	Yes	Peru	NA	Peru	America	South America	America	Human	Stools	NA	S. enterica	Paratyphi B	Present	Taunton	aroC(2)	dnaN(14)	hemD(24)	hisD(14)	purE(37)	sucA(19)	thrA(8)	86	Lineage 10	10.3.6_SouthAmerica	341228	341221	341221	341221	1857	1620	1620	1620	155	155	2	2				none	99.94	161.92	97.9137	6229242	250
356	201900702		2019	2019	Yes	France	Peru	Peru	America	South America	America	Human	Blood	NA	S. enterica	Paratyphi B	Present	Not available	aroC(2)	dnaN(14)	hemD(24)	hisD(14)	purE(37)	sucA(19)	thrA(8)	86	Lineage 10	10.3.6_SouthAmerica	341878	341878	341878	341878	1857	1620	1620	1620	155	155	2	2	Susceptible	4	0.008	none	99.93	60.34	98.5168	2087442	259
357	03-9927	B03-9927	2003	2003		France	Unknown	France or elsewhere	Unknown	Unknown	Unknown	Human	Unknown	NA	S. enterica	Paratyphi B	Present	Not available	aroC(2)	dnaN(14)	hemD(24)	hisD(14)	purE(37)	sucA(19)	thrA(8)	86	Lineage 10	10.3.6_SouthAmerica	341311	341311	341311	341311	1857	1620	1620	1620	155	155	2	2				none	99.94	138.57	96.5002	6403166	236
358	SMG-20-998		2013	2013		United Kingdom	South America	ND (South America)	America	South America	America	Human	Stools	NA	S. enterica	Paratyphi B	Present	Not available	aroC(2)	dnaN(14)	hemD(24)	hisD(14)	purE(37)	sucA(19)	thrA(8)	86	Lineage 10	10.3.6_SouthAmerica	234291	234291	234291	234291	1857	1620	1620	1620	155	155	2	2				none	99.94	83.18	96.485	1704206	231
359	575132		2018	2018		United Kingdom	Bolivia	Bolivia	America	South America	America	Human	Stools	NA	S. enterica	Paratyphi B	Present	Not available	aroC(2)	dnaN(14)	hemD(24)	hisD(14)	purE(37)	sucA(19)	thrA(8)	86	Lineage 10	10.3.6_SouthAmerica	160419	160419	160419	160419	1857	1620	1620	1620	155	155	2	2				none	99.92	60.14	98.3751	2872678	258
360	874835		2020	2020		United Kingdom	South America	ND (South America)	America	South America	America	Human	Unknown	NA	S. enterica	Paratyphi B	Present	Not available	aroC(2)	dnaN(14)	hemD(24)	hisD(14)	purE(37)	sucA(19)	thrA(8)	86	Lineage 10	10.3.6_SouthAmerica	223700	223700	26385	26385	26385	1620	1620	1620	155	155	2	2				none	99.07	58.07	98.1088	2750954	282
361	43_PB-J		2008	2008		Spain	NA	Spain	Europe	Southern Europe	Europe	Human	Blood	NA	S. enterica	Paratyphi B	Present	Not available	aroC(2)	dnaN(14)	hemD(24)	hisD(14)	purE(37)	sucA(19)	thrA(8)	86	Lineage 10	10.3.6_SouthAmerica	26385	26385	26385	26385	26385	1620	1620	1620	155	155	2	2				none	99.14	139.01	97.7685	7215660	273
362	201907308		2019	2019		France	Bolivia	Bolivia	America	South America	America	Human	Stools	NA	S. enterica	Paratyphi B	Present	Not available	aroC(2)	dnaN(14)	hemD(24)	hisD(14)	purE(37)	sucA(19)	thrA(8)	86	Lineage 10	10.3.6_SouthAmerica	342093	342093	26385	26385	26385	1620	1620	1620	155	155	2	2	Susceptible	6	0.023	none	99.07	150.61	97.7998	5113908	279
363	31936		2014	2014		United Kingdom	Bolivia	Bolivia	America	South America	America	Human	Stools	NA	S. enterica	Paratyphi B	Present	Taunton	aroC(2)	dnaN(14)	hemD(24)	hisD(14)	purE(37)	sucA(19)	thrA(8)	86	Lineage 10	10.3.6_SouthAmerica	26385	26385	26385	26385	26385	1620	1620	1620	155	155	2	2				none	99.07	62.61	98.3843	3127014	268
364	440068		2017	2017		United Kingdom	Bolivia	Bolivia	America	South America	America	Human	Blood	NA	S. enterica	Paratyphi B	Present	Not available	aroC(2)	dnaN(14)	hemD(24)	hisD(14)	purE(37)	sucA(19)	thrA(8)	86	Lineage 10	10.3.6_SouthAmerica	126949	26385	26385	26385	26385	1620	1620	1620	155	155	2	2				gyrA_S83F	99.07	53.44	97.8207	2541996	288
365	SMG-20-1001		2020	2020		United Kingdom	Bolivia, Chile	Bolivia, Chile	America	South America	America	Human	Stools	NA	S. enterica	Paratyphi B	Present	Not available	aroC(2)	dnaN(14)	hemD(24)	hisD(14)	purE(37)	sucA(19)	thrA(8)	86	Lineage 10	10.3.6_SouthAmerica	234292	234292	35707	17707	1857	1620	1620	1620	155	155	2	2				none	99.92	91.71	98.3822	1722986	242
366	H73700271		2007	2007		United Kingdom	South America	ND (South America)	America	South America	America	Human	Blood	NA	S. enterica	Paratyphi B	Present	Not available	aroC(2)	dnaN(14)	hemD(24)	hisD(14)	purE(37)	sucA(19)	thrA(8)	86	Lineage 10	10.3.6_SouthAmerica	17707	17707	17707	17707	1857	1620	1620	1620	155	155	2	2				none	99.92	44.83	96.5943	4071190	253
367	SMG-20-963		1995	1995		United Kingdom	South America	ND (South America)	America	South America	America	Human	Stools	NA	S. enterica	Paratyphi B	Present	Taunton	aroC(2)	dnaN(14)	hemD(24)	hisD(14)	purE(37)	sucA(19)	thrA(8)	86	Lineage 10	10.3.6_SouthAmerica	234062	234062	35707	17707	1857	1620	1620	1620	155	155	2	2				none	99.92	53.92	98.078	986268	245
368	SMG-20-974		1995	1995	Yes	United Kingdom	Bolivia	Bolivia	America	South America	America	Human	Stools	NA	S. enterica	Paratyphi B	Present	Not available	aroC(2)	dnaN(14)	hemD(24)	hisD(14)	purE(37)	sucA(19)	thrA(8)	86	Lineage 10	10.3.6_SouthAmerica	234062	234062	35707	17707	1857	1620	1620	1620	155	155	2	2				none	99.92	81.42	97.2704	1516880	239
369	454903		2017	2017		United Kingdom	Bolivia	Bolivia	America	South America	America	Human	Blood	NA	S. enterica	Paratyphi B	Present	Not available	aroC(2)	dnaN(14)	hemD(24)	hisD(14)	purE(37)	sucA(19)	thrA(8)	86	Lineage 10	10.3.6_SouthAmerica	119607	119607	119607	119607	1857	1620	1620	1620	155	155	2	2				none	99.93	95.42	98.4054	4609196	258
370	454881		2017	2017		United Kingdom	No travel	United Kingdom	Europe	Northern Europe	Europe	Human	Stools	NA	S. enterica	Paratyphi B	Present	Not available	aroC(2)	dnaN(14)	hemD(24)	hisD(14)	purE(37)	sucA(19)	thrA(8)	86	Lineage 10	10.3.6_SouthAmerica	120708	120708	68095	68095	1857	1620	1620	1620	155	155	2	2				none	99.92	29.89	98.0397	1460564	258
371	201704389		2017	2017		France	Bolivia	Bolivia	America	South America	America	Human	Blood	NA	S. enterica	Paratyphi B	Present	Not available	aroC(2)	dnaN(14)	hemD(24)	hisD(14)	purE(37)	sucA(19)	thrA(8)	86	Lineage 10	10.3.6_SouthAmerica	341938	341938	68095	68095	1857	1620	1620	1620	155	155	2	2	Susceptible	8	0.032	none	99.92	129.06	98.2075	4231266	257
372	P7704		2019	2019		France	Argentina, Uruguay	Argentina, Uruguay	America	South America	America	Human	Blood	NA	S. enterica	Paratyphi B	Present	Not available	aroC(2)	dnaN(14)	hemD(24)	hisD(14)	purE(37)	sucA(19)	thrA(8)	86	Lineage 10	10.3.6_SouthAmerica	353643	68095	68095	68095	1857	1620	1620	1620	155	155	2	2				blaOXA-48, qnrB19	99.91	41.85	98.126	2000000	268
373	201700708		2017	2017		France	Argentina	Argentina	America	South America	America	Human	Blood	NA	S. enterica	Paratyphi B	Present	Not available	aroC(2)	dnaN(14)	hemD(24)	hisD(14)	purE(37)	sucA(19)	thrA(8)	86	Lineage 10	10.3.6_SouthAmerica	68095	68095	68095	68095	1857	1620	1620	1620	155	155	2	2	Susceptible			none	99.92	133.07	98.2665	4429726	251
374	201800826		2018	2018		France	Unknown	France or elsewhere	Unknown	Unknown	Unknown	Human	Stools	NA	S. enterica	Paratyphi B	Present	Not available	aroC(2)	dnaN(14)	hemD(24)	hisD(14)	purE(37)	sucA(19)	thrA(8)	86	Lineage 10	10.3.6_SouthAmerica	68095	68095	68095	68095	1857	1620	1620	1620	155	155	2	2	Susceptible	4	0.012	none	99.91	139.27	98.1053	4486942	251
375	841378		2019	2019		United Kingdom	Argentina	Argentina	America	South America	America	Human	Stools	NA	S. enterica	Paratyphi B	Present	Not available	aroC(2)	dnaN(14)	hemD(24)	hisD(14)	purE(37)	sucA(19)	thrA(8)	86	Lineage 10	10.3.6_SouthAmerica	68095	68095	68095	68095	1857	1620	1620	1620	155	155	2	2				none	99.93	133.53	98.3153	6364398	256
376	658623		2018	2018		United Kingdom	Argentina	Argentina	America	South America	America	Human	Unknown	NA	S. enterica	Paratyphi B	Present	Not available	aroC(2)	dnaN(14)	hemD(24)	hisD(14)	purE(37)	sucA(19)	thrA(8)	86	Lineage 10	10.3.6_SouthAmerica	68095	68095	68095	68095	1857	1620	1620	1620	155	155	2	2				none	99.92	70.19	98.5549	3417722	249
377	MS170024		2016	2016		Ireland	South America	ND (South America)	America	South America	America	Human	Blood	NA	S. enterica	Paratyphi B	Present	Not available	aroC(2)	dnaN(14)	hemD(24)	hisD(14)	purE(37)	sucA(19)	thrA(8)	86	Lineage 10	10.3.6_SouthAmerica	68095	68095	68095	68095	1857	1620	1620	1620	155	155	2	2				none	99.93	56.67	98.5854	2762570	255
378	201711578		2017	2017		France	Argentina	Argentina	America	South America	America	Human	Stools	NA	S. enterica	Paratyphi B	Present	Not available	aroC(2)	dnaN(14)	hemD(24)	hisD(14)	purE(37)	sucA(19)	thrA(8)	86	Lineage 10	10.3.6_SouthAmerica	68095	68095	68095	68095	1857	1620	1620	1620	155	155	2	2	Susceptible	4	0.008	none	99.9	130.34	98.1477	4345926	250
379	1137926		2010	2010		United Kingdom	South America	ND_SouthAmerica	America	South America	America	Human	Stools	NA	S. enterica	Paratyphi B	Present	Dundee	aroC(2)	dnaN(14)	hemD(24)	hisD(14)	purE(37)	sucA(19)	thrA(8)	86	Lineage 10	10.3.6_SouthAmerica	262009	262009	68095	68095	1857	1620	1620	1620	155	155	2	2				none	99.92	91.97	92.8193	6006428	249
380	202000134		2020	2020	Yes	France	Argentina	Argentina	America	South America	America	Human	Stools	NA	S. enterica	Paratyphi B	Present	Not available	aroC(2)	dnaN(14)	hemD(24)	hisD(14)	purE(37)	sucA(19)	thrA(8)	86	Lineage 10	10.3.6_SouthAmerica	342087	342087	68095	68095	1857	1620	1620	1620	155	155	2	2	Susceptible	4	0.023	none	99.9	134.48	98.4827	4441916	255
381	201412010		2014	2014		France	Brazil	Brazil	America	South America	America	Human	Blood	NA	S. enterica	Paratyphi B	Present	Not available	aroC(2)	dnaN(14)	hemD(24)	hisD(14)	purE(37)	sucA(19)	thrA(8)	86	Lineage 10	10.3.6_SouthAmerica	261616	32232	1857	1857	1857	1620	1620	1620	155	155	2	2	Susceptible			none	99.07	203.47	98.5605	6894866	244
382	201502579		2015	2015		France	Peru	Peru	America	South America	America	Human	Stools	NA	S. enterica	Paratyphi B	Present	Not available	aroC(2)	dnaN(14)	hemD(24)	hisD(14)	purE(37)	sucA(19)	thrA(8)	86	Lineage 10	10.3.6_SouthAmerica	32232	32232	1857	1857	1857	1620	1620	1620	155	155	2	2	Susceptible	6	0.008	none	99.05	116.72	98.3105	3995436	247
383	201905260		2019	2019		France	South America	ND (South America)	America	South America	America	Human	Stools	NA	S. enterica	Paratyphi B	Present	Not available	aroC(2)	dnaN(14)	hemD(24)	hisD(14)	purE(37)	sucA(19)	thrA(8)	86	Lineage 10	10.3.6_SouthAmerica	341935	341935	1857	1857	1857	1620	1620	1620	155	155	2	2	Susceptible	4	0.012	none	99.01	62.34	98.4122	2119328	247
384	410878		2017	2017		United Kingdom	Bolivia	Bolivia	America	South America	America	Human	Blood	NA	S. enterica	Paratyphi B	Present	Not available	aroC(2)	dnaN(14)	hemD(24)	hisD(14)	purE(37)	sucA(19)	thrA(8)	86	Lineage 10	10.3.6_SouthAmerica	32232	32232	1857	1857	1857	1620	1620	1620	155	155	2	2				none	99.07	87.35	98.209	4162774	254
385	H103520475		2010	2010		United Kingdom	South America	ND (South America)	America	South America	America	Human	Blood	NA	S. enterica	Paratyphi B	Present	Not available	aroC(2)	dnaN(14)	hemD(24)	hisD(14)	purE(37)	sucA(19)	thrA(8)	86	Lineage 10	10.3.6_SouthAmerica	32232	32232	1857	1857	1857	1620	1620	1620	155	155	2	2				none	99.17	156.1	97.5532	8169766	249
386	201908452		2019	2019	Yes	France	Bolivia	Bolivia	America	South America	America	Human	Blood	NA	S. enterica	Paratyphi B	Present	Not available	aroC(2)	dnaN(14)	hemD(24)	hisD(14)	purE(37)	sucA(19)	thrA(8)	86	Lineage 10	10.3.6_SouthAmerica	342089	342089	1857	1857	1857	1620	1620	1620	155	155	2	2	Susceptible	4	0.012	none	98.94	59	98.4616	1971604	252
387	201711516		2017	2017		France	Bolivia	Bolivia	America	South America	America	Human	Blood	NA	S. enterica	Paratyphi B	Present	Not available	aroC(2)	dnaN(14)	hemD(24)	hisD(14)	purE(37)	sucA(19)	thrA(8)	86	Lineage 10	10.3.6_SouthAmerica	341927	32232	1857	1857	1857	1620	1620	1620	155	155	2	2	Susceptible			none	99.07	157.46	99.018	5139178	242
388	SMG-20-1008		2020	2020		United Kingdom	South America	ND (South America)	America	South America	America	Human	Blood	NA	S. enterica	Paratyphi B	Present	Taunton	aroC(2)	dnaN(14)	hemD(24)	hisD(14)	purE(37)	sucA(19)	thrA(8)	86	Lineage 10	10.3.6_SouthAmerica	234290	1857	1857	1857	1857	1620	1620	1620	155	155	2	2				none	99.08	88.88	98.1163	1773662	235
389	H070540154v1		2007	2007		United Kingdom	Bolivia	Bolivia	America	South America	America	Human	Blood	NA	S. enterica	Paratyphi B	Present	Not available	aroC(2)	dnaN(14)	hemD(24)	hisD(14)	purE(37)	sucA(19)	thrA(8)	86	Lineage 10	10.3.6_SouthAmerica	17702	1857	1857	1857	1857	1620	1620	1620	155	155	2	2				none	99.11	51.52	97.1947	4618346	241
390	83283		2014	2014	Yes	United Kingdom	Peru	Peru	America	South America	America	Human	Blood	NA	S. enterica	Paratyphi B	Present	Taunton	aroC(2)	dnaN(14)	hemD(24)	hisD(14)	purE(37)	sucA(19)	thrA(8)	86	Lineage 10	10.3.6_SouthAmerica	28320	1857	1857	1857	1857	1620	1620	1620	155	155	2	2				none	99.09	49.87	98.3902	2809376	250
391	83282		2014	2014		United Kingdom	Peru	Peru	America	South America	America	Human	Blood	NA	S. enterica	Paratyphi B	Present	Not available	aroC(2)	dnaN(14)	hemD(24)	hisD(14)	purE(37)	sucA(19)	thrA(8)	86	Lineage 10	10.3.6_SouthAmerica	28320	1857	1857	1857	1857	1620	1620	1620	155	155	2	2				sul1, dfrA5,mphA	99.08	59.34	93.8919	3241068	249
392	RKI_15-04049		2015	2015	Yes	Germany	Bolivia, Peru	Bolivia, Peru	America	South America	America	Human	Stools	NA	S. enterica	Paratyphi B	Present	Not available	aroC(2)	dnaN(14)	hemD(24)	hisD(14)	purE(37)	sucA(19)	thrA(8)	86	Lineage 10	10.3.6_SouthAmerica	184422	119499	1857	1857	1857	1620	1620	1620	155	155	2	2				gyrA_D87G	99.1	76.51	95.1888	2349970	247
393	201004976		2010	2010	Yes	France	Chile	Chile	America	South America	America	Human	Blood	NA	S. enterica	Paratyphi B	Present	Not available	aroC(2)	dnaN(14)	hemD(24)	hisD(14)	purE(37)	sucA(19)	thrA(8)	86	Lineage 10	10.3.6_SouthAmerica	341302	341302	1857	1857	1857	1620	1620	1620	155	155	2	2	Susceptible	4	0.008	none	99.19	106.65	96.5651	4866930	245
394	129499		2015	2015		United Kingdom	Bolivia	Bolivia	America	South America	America	Human	Stools	NA	S. enterica	Paratyphi B	Present	Not available	aroC(2)	dnaN(14)	hemD(24)	hisD(14)	purE(37)	sucA(19)	thrA(8)	86	Lineage 10	10.3.6_SouthAmerica	1857	1857	1857	1857	1857	1620	1620	1620	155	155	2	2				none	99.08	39.14	97.8996	2006730	242
395	201800151		2018	2018		France	Peru	Peru	America	South America	America	Human	Blood	NA	S. enterica	Paratyphi B	Present	Not available	aroC(2)	dnaN(14)	hemD(24)	hisD(14)	purE(37)	sucA(19)	thrA(8)	86	Lineage 10	10.3.6_SouthAmerica	341959	341959	1857	1857	1857	1620	1620	1620	155	155	2	2	NAL (CIP)	≥ 256	0.094	gyrA_D87N	99.04	133.97	98.3881	4386572	255
396	H104240488		2010	2010	Yes	United Kingdom	South America	ND (South America)	America	South America	America	Human	Blood	NA	S. enterica	Paratyphi B	Present	Not available	aroC(2)	dnaN(14)	hemD(24)	hisD(14)	purE(37)	sucA(19)	thrA(8)	86	Lineage 10	10.3.6_SouthAmerica	19820	1857	1857	1857	1857	1620	1620	1620	155	155	2	2				none	99.94	135.79	97.4557	7170236	210
397	S275240		2019	2019	Yes	Ireland	South America	ND (South America)	America	South America	America	Human	Stools	NA	S. enterica	Paratyphi B	Present	Not available	aroC(2)	dnaN(14)	hemD(24)	hisD(14)	purE(37)	sucA(19)	thrA(8)	86	Lineage 10	10.3.6_SouthAmerica	19820	1857	1857	1857	1857	1620	1620	1620	155	155	2	2				none	99.09	61.68	97.6499	2103866	202
398	201903679		2019	2019		France	Bolivia	Bolivia	America	South America	America	Human	Stools	NA	S. enterica	Paratyphi B	Present	Not available	aroC(2)	dnaN(14)	hemD(24)	hisD(14)	purE(37)	sucA(19)	thrA(8)	86	Lineage 10	10.3.6_SouthAmerica	341939	1857	1857	1857	1857	1620	1620	1620	155	155	2	2	Susceptible	6	0.016	none	99.03	68.05	98.6369	2235108	242
399	201708949		2017	2017	Yes	France	South America	ND (South America)	America	South America	America	Human	Blood	NA	S. enterica	Paratyphi B	Present	Not available	aroC(2)	dnaN(14)	hemD(24)	hisD(14)	purE(37)	sucA(19)	thrA(8)	86	Lineage 10	10.3.6_SouthAmerica	19820	1857	1857	1857	1857	1620	1620	1620	155	155	2	2	Susceptible	6	0.008	none	99.08	89.9	98.6865	3066638	246
400	202107757		2021	2021	Yes	France	Bolivia	Bolivia	America	South America	America	Human	Stools	NA	S. enterica	Paratyphi B	Present	Not available	aroC(2)	dnaN(14)	hemD(24)	hisD(14)	purE(37)	sucA(19)	thrA(8)	86	Lineage 10	10.3.6_SouthAmerica	289426	1857	1857	1857	1857	1620	1620	1620	155	155	2	2	Susceptible	6	0.012	none	99.08	145.63	98.4105	5164380	243
401	201710889		2017	2017	Yes	France	Bolivia	Bolivia	America	South America	America	Human	Blood	NA	S. enterica	Paratyphi B	Present	Not available	aroC(2)	dnaN(14)	hemD(24)	hisD(14)	purE(37)	sucA(19)	thrA(8)	86	Lineage 10	10.3.6_SouthAmerica	19820	1857	1857	1857	1857	1620	1620	1620	155	155	2	2	Susceptible			none	98.92	111.53	98.5127	3615370	250
402	201803542		2018	2018		France	Peru	Peru	America	South America	America	Human	Blood	NA	S. enterica	Paratyphi B	Present	Not available	aroC(2)	dnaN(14)	hemD(24)	hisD(14)	purE(37)	sucA(19)	thrA(8)	86	Lineage 10	10.3.6_SouthAmerica	19820	1857	1857	1857	1857	1620	1620	1620	155	155	2	2	Susceptible	3	0.008	none	99.06	172.82	98.3652	5553026	246
403	201807370		2018	2018		France	Bolivia	Bolivia	America	South America	America	Human	Blood	NA	S. enterica	Paratyphi B	Present	Not available	aroC(2)	dnaN(14)	hemD(24)	hisD(14)	purE(37)	sucA(19)	thrA(8)	86	Lineage 10	10.3.6_SouthAmerica	19820	1857	1857	1857	1857	1620	1620	1620	155	155	2	2	Susceptible	4	0.012	none	99.08	89.75	98.3415	3221312	245
404	201007632		2010	2010		France	Chile	Chile	America	South America	America	Human	Blood	NA	S. enterica	Paratyphi B	Present	Not available	aroC(2)	dnaN(14)	hemD(24)	hisD(14)	purE(37)	sucA(19)	thrA(8)	86	Lineage 10	10.3.6_SouthAmerica	341285	341285	341285	1857	1857	1620	1620	1620	155	155	2	2	Susceptible	4	0.016	none	99.27	36.74	94.0583	1739028	254
405	845690		2019	2019	Yes	United Kingdom	Brazil	Brazil	America	South America	America	Human	Stools	NA	S. enterica	Paratyphi B	Present	Not available	aroC(2)	dnaN(14)	hemD(24)	hisD(14)	purE(37)	sucA(19)	thrA(8)	86	Lineage 10	10.3.6_SouthAmerica	217033	1857	1857	1857	1857	1620	1620	1620	155	155	2	2				none	99.08	81.27	98.4302	3851960	253
406	886703		2020	2020	Yes	United Kingdom	Argentina	Argentina	America	South America	America	Human	Stools	NA	S. enterica	Paratyphi B	Present	Not available	aroC(2)	dnaN(14)	hemD(24)	hisD(14)	purE(37)	sucA(19)	thrA(8)	86	Lineage 10	10.3.6_SouthAmerica	217033	1857	1857	1857	1857	1620	1620	1620	155	155	2	2				none	99.18	84.93	98.4204	4031882	263
407	1137915		2009	2009		United Kingdom	Bolivia	Bolivia	America	South America	America	Human	Blood	NA	S. enterica	Paratyphi B	Present	Taunton	aroC(2)	dnaN(14)	hemD(24)	hisD(14)	purE(37)	sucA(19)	thrA(8)	86	Lineage 10	10.3.6_SouthAmerica	19820	1857	1857	1857	1857	1620	1620	1620	155	155	2	2				none	99.22	84.89	93.0627	5148934	246
408	243874		2016	2016	Yes	United Kingdom	Bolivia	Bolivia	America	South America	America	Human	Blood	NA	S. enterica	Paratyphi B	Present	Not available	aroC(2)	dnaN(14)	hemD(24)	hisD(14)	purE(37)	sucA(19)	thrA(8)	86	Lineage 10	10.3.6_SouthAmerica	19820	1857	1857	1857	1857	1620	1620	1620	155	155	2	2				qnrB19	99.08	64.43	94.9386	3456574	252
409	201412266		2014	2014		France	Peru	Peru	America	South America	America	Human	Stools	NA	S. enterica	Paratyphi B	Present	Not available	aroC(2)	dnaN(14)	hemD(24)	hisD(14)	purE(37)	sucA(19)	thrA(8)	86	Lineage 10	10.3.6_SouthAmerica	341323	341323	1857	1857	1857	1620	1620	1620	155	155	2	2	Susceptible			none	99.12	102.14	96.2721	4670866	250
410	RKI_16-00770		2016	2016	Yes	Germany	Bolivia	Bolivia	America	South America	America	Human	Stools	NA	S. enterica	Paratyphi B	Present	Not available	aroC(2)	dnaN(14)	hemD(24)	hisD(14)	purE(37)	sucA(19)	thrA(8)	86	Lineage 10	10.3.6_SouthAmerica	19820	1857	1857	1857	1857	1620	1620	1620	155	155	2	2				none	98.94	36.05	98.1426	725524	244
411	201907215		2019	2019		France	Bolivia	Bolivia	America	South America	America	Human	Stools	NA	S. enterica	Paratyphi B	Present	Not available	aroC(2)	dnaN(14)	hemD(24)	hisD(14)	purE(37)	sucA(19)	thrA(8)	86	Lineage 10	10.3.6_SouthAmerica	19820	1857	1857	1857	1857	1620	1620	1620	155	155	2	2	Susceptible	3	0.012	none	99.21	209.87	98.52	6911646	277
412	576405		2018	2018		United Kingdom	Argentina, Bolivia, Brazil, Colombia, Chile	Argentina, Bolivia, Brazil, Colombia, Chile	America	South America	America	Human	Stools	NA	S. enterica	Paratyphi B	Present	Not available	aroC(2)	dnaN(14)	hemD(24)	hisD(14)	purE(37)	sucA(19)	thrA(8)	86	Lineage 10	10.3.6_SouthAmerica	19820	1857	1857	1857	1857	1620	1620	1620	155	155	2	2				none	99.09	73	92.1643	3686208	254
413	201707432		2017	2017		France	Bolivia	Bolivia	America	South America	America	Human	Blood	NA	S. enterica	Paratyphi B	Present	Not available	aroC(2)	dnaN(14)	hemD(24)	hisD(14)	purE(37)	sucA(19)	thrA(8)	86	Lineage 10	10.3.6_SouthAmerica	341931	1857	1857	1857	1857	1620	1620	1620	155	155	2	2	Susceptible	4	0.008	none	99.08	124.05	98.5218	4152164	249
414	201904044		2019	2019		France	Argentina, Chile, Bolivia or Peru	Argentina, Chile, Bolivia or Peru	America	South America	America	Human	Stools	NA	S. enterica	Paratyphi B	Present	Not available	aroC(2)	dnaN(14)	hemD(24)	hisD(14)	purE(37)	sucA(19)	thrA(8)	86	Lineage 10	10.3.6_SouthAmerica	19820	1857	1857	1857	1857	1620	1620	1620	155	155	2	2	Susceptible	4	0.012	none	99.07	162.6	98.5326	5189868	254
415	707210		2019	2019		United Kingdom	Colombia	Colombia	America	South America	America	Human	Blood	NA	S. enterica	Paratyphi B	Present	Not available	aroC(2)	dnaN(14)	hemD(24)	hisD(14)	purE(37)	sucA(19)	thrA(8)	86	Lineage 10	10.3.6_SouthAmerica	19820	1857	1857	1857	1857	1620	1620	1620	155	155	2	2				none	99.08	91.93	98.2985	4348082	253
416	29-67	B67-504	1967	1967	Yes	Greece	NA	Greece	Europe	Southern Europe	Europe	Human	Unknown	NA	S. enterica	Paratyphi B	Present	Taunton	aroC(2)	dnaN(14)	hemD(24)	hisD(14)	purE(37)	sucA(19)	thrA(8)	86	Lineage 10	10.3	341232	341232	341232	341232	1857	1620	1620	1620	155	155	2	2				none	99.94	244.13	96.78	11176454	217
417	112-74	B74-1296	1974	1974	Yes	France	Lebanon	Lebanon	Asia	Western Asia	Middle East	Human	Blood	NA	S. enterica	Paratyphi B	Present	Dundee	aroC(2)	dnaN(14)	hemD(24)	hisD(14)	purE(37)	sucA(19)	thrA(8)	86	Lineage 10	10.3.5_MiddleEast2	341253	341253	341253	341253	1857	1620	1620	1620	155	155	2	2				none	99.94	106.37	94.9937	4967856	237
418	RKI_16-02907		2016	2016	Yes	Germany	Syria	Syria	Asia	Western Asia	Middle East	Human	Blood	NA	S. enterica	Paratyphi B	Present	Not available	aroC(2)	dnaN(14)	hemD(24)	hisD(14)	purE(37)	sucA(19)	thrA(8)	86	Lineage 10	10.3.5_MiddleEast2	184504	184504	184504	184504	1857	1620	1620	1620	155	155	2	2				none	99.94	110.65	96.7577	3003796	248
419	78-2965		1978	1978		United States (District of Columbia)	Saudi Arabia	Saudi Arabia	Asia	Western Asia	Middle East	Human	Stools	NA	S. enterica	Paratyphi B	Present	Not available	aroC(2)	dnaN(14)	hemD(24)	hisD(14)	purE(37)	sucA(19)	thrA(8)	86	Lineage 10	10.3.5_MiddleEast2	277452	277452	277452	84211	1857	1620	1620	1620	155	155	2	2	Susceptible			none	99.94	151.24	97.6698	5294332	229
420	175-75	B75-1869	1975	1975	Yes	France	Egypt	Egypt	Africa	Northern Africa	Middle East	Human	Blood	NA	S. enterica	Paratyphi B	Present	Dundee	aroC(2)	dnaN(14)	hemD(24)	hisD(14)	purE(37)	sucA(19)	thrA(8)	86	Lineage 10	10.3.5_MiddleEast2	261578	261578	261578	261578	1857	1620	1620	1620	155	155	2	2	Susceptible			none	99.87	92.41	97.6937	3183034	237
421	147871		2015	2015		United Kingdom	Unknown	UK or elsewhere	Unknown	Unknown	Unknown	Human	Blood	NA	S. enterica	Paratyphi B	Present	Not available	aroC(2)	dnaN(14)	hemD(24)	hisD(14)	purE(37)	sucA(19)	thrA(8)	86	Lineage 10	10.3.5_MiddleEast2	84211	84211	84211	84211	1857	1620	1620	1620	155	155	2	2				none	99.94	58.75	98.3176	3032422	247
422	201708500		2017	2017	Yes	France	Turkey	Turkey	Asia	Western Asia	Middle East	Human	Blood	NA	S. enterica	Paratyphi B	Present	Not available	aroC(2)	dnaN(14)	hemD(24)	hisD(14)	purE(37)	sucA(19)	thrA(8)	86	Lineage 10	10.3.5_MiddleEast2	84211	84211	84211	84211	1857	1620	1620	1620	155	155	2	2	Susceptible	4	0.008	none	99.94	62.62	98.2936	2311010	234
423	SPPI_19		1957	1957	Yes	Russian Federation (St-Petersburg region)	NA	Russian Federation	Europe	Eastern Europe	Europe	Human	Unknown	NA	S. enterica	Paratyphi B	Present	Not available	aroC(2)	dnaN(14)	hemD(24)	hisD(14)	purE(37)	sucA(19)	thrA(8)	86	Lineage 10	10.3	289315	289315	289315	289315	1857	1620	1620	1620	155	155	2	2	Susceptible			none	99.69	219.49	97.9539	7466366	218
424	SPPI_31		1958	1958		Russian Federation (St-Petersburg region)	NA	Russian Federation	Europe	Eastern Europe	Europe	Human	Unknown	NA	S. enterica	Paratyphi B	Present	Not available	aroC(2)	dnaN(14)	hemD(24)	hisD(14)	purE(37)	sucA(19)	thrA(8)	86	Lineage 10	10.3	289324	289324	289324	289315	1857	1620	1620	1620	155	155	2	2	Susceptible			none	99.68	235.46	98.1741	7954064	222
425	SPPI_25		1957	1957		Russian Federation (St-Petersburg region)	NA	Russian Federation	Europe	Eastern Europe	Europe	Human	Unknown	NA	S. enterica	Paratyphi B	Present	Not available	aroC(2)	dnaN(14)	hemD(24)	hisD(14)	purE(37)	sucA(19)	thrA(8)	86	Lineage 10	10.3	289334	289334	289334	289334	1857	1620	1620	1620	155	155	2	2	Susceptible			none	99.38	202.5	97.406	6884502	206
426	200007388		2000	2000		France	Turkey	Turkey	Asia	Western Asia	Middle East	Human	Blood	NA	S. enterica	Paratyphi B	Present	Dundee	aroC(2)	dnaN(14)	hemD(24)	hisD(14)	purE(37)	sucA(19)	thrA(8)	86	Lineage 10	10.3	261568	261568	261568	261568	1857	1620	1620	1620	155	155	2	2	Susceptible	6	0.047	none	99.63	133.36	98.4919	4574636	230
427	188-75	B75-2195	1975	1975		France	NA	France	Europe	Western Europe	Europe	Human	Stools	NA	S. enterica	Paratyphi B	Present	Taunton	aroC(2)	dnaN(14)	hemD(24)	hisD(14)	purE(37)	sucA(19)	thrA(8)	86	Lineage 10	10.3	341237	341237	341237	341237	1857	1620	1620	1620	155	155	2	2				none	99.89	48.97	96.9094	2248528	266
428	64-83	B83-1044	1983	1983	Yes	France	NA	France	Europe	Western Europe	Europe	Human	Blood	NA	S. enterica	Paratyphi B	Present	Taunton	aroC(2)	dnaN(14)	hemD(24)	hisD(14)	purE(37)	sucA(19)	thrA(8)	86	Lineage 10	10.3	341272	341272	341272	341272	1857	1620	1620	1620	155	155	2	2				none	99.9	74.51	93.5138	3598200	250
429	897254		2011	2011		United Kingdom	No travel	United Kingdom	Europe	Northern Europe	Europe	Human	Stools	NA	S. enterica	Paratyphi B	Present	Not available	aroC(2)	dnaN(14)	hemD(24)	hisD(14)	purE(37)	sucA(19)	thrA(8)	86	Lineage 10	10.3	245352	245352	245352	245352	245352	1620	1620	1620	155	155	2	2				gyrA_D82N	99.91	68.41	98.3672	3549760	290
430	201708437		2017	2017	Yes	France	Turkey	Turkey	Asia	Western Asia	Middle East	Human	Blood	NA	S. enterica	Paratyphi B	Present	Not available	aroC(2)	dnaN(14)	hemD(24)	hisD(14)	purE(37)	sucA(19)	thrA(8)	86	Lineage 10	10.3	256887	256887	256887	256887	1857	1620	1620	1620	155	155	2	2	Susceptible	6	0.016	none	99.83	139.28	98.3942	4571954	246
431	201707833		2017	2017		France	Turkey	Turkey	Asia	Western Asia	Middle East	Human	Blood	NA	S. enterica	Paratyphi B	Present	Not available	aroC(2)	dnaN(14)	hemD(24)	hisD(14)	purE(37)	sucA(19)	thrA(8)	86	Lineage 10	10.3	341926	256887	256887	256887	1857	1620	1620	1620	155	155	2	2	Susceptible	4	0.008	none	99.88	74.97	98.3762	2718652	249
432	180-76	B76-1987	1976	1976	Yes	France	Turkey	Turkey	Asia	Western Asia	Middle East	Human	Blood	NA	S. enterica	Paratyphi B	Present	Dundee	aroC(2)	dnaN(14)	hemD(24)	hisD(14)	purE(37)	sucA(19)	thrA(8)	86	Lineage 10	10.3	289352	289352	289352	289352	1857	1620	1620	1620	155	155	2	2	Susceptible			none	99.93	312.04	97.4898	10674132	248
433	79-65	B65-1338	1965	1965	Yes	Turkey	NA	Turkey	Asia	Western Asia	Middle East	Animal	Fly	NA	S. enterica	Paratyphi B	Present	Taunton	aroC(2)	dnaN(14)	hemD(24)	hisD(14)	purE(37)	sucA(19)	thrA(8)	86	Lineage 10	10.3	341191	341191	341191	341191	37812	1620	1620	1620	155	155	2	2				none	99.94	163.77	98.0963	6296196	299
434	77-65	B65-13	1965	1965		Turkey	NA	Turkey	Asia	Western Asia	Middle East	Animal	Fly	NA	S. enterica	Paratyphi B	Present	Taunton	aroC(2)	dnaN(14)	hemD(24)	hisD(14)	purE(37)	sucA(19)	thrA(8)	86	Lineage 10	10.3	341197	341197	341191	341191	37812	1620	1620	1620	155	155	2	2	Susceptible			none	99.94	188.2	97.1948	7301554	296
435	75-65	B65-1326	1965	1965		Turkey	NA	Turkey	Asia	Western Asia	Middle East	Human	Pus	NA	S. enterica	Paratyphi B	Present	Taunton	aroC(2)	dnaN(14)	hemD(24)	hisD(14)	purE(37)	sucA(19)	thrA(8)	86	Lineage 10	10.3	341202	341202	341202	341191	37812	1620	1620	1620	155	155	2	2				none	99.94	177.32	96.3475	8152480	290
436	6-61		1961	1961		Turkey	NA	Turkey	Asia	Western Asia	Middle East	Human	Unknown	NA	S. enterica	Paratyphi B	Present	Not available	aroC(2)	dnaN(14)	hemD(24)	hisD(14)	purE(37)	sucA(19)	thrA(8)	86	Lineage 10	10.3	261539	261539	261538	261538	37812	1620	1620	1620	155	155	2	2	Susceptible			none	99.89	95.52	98.3585	3228296	279
437	9-61		1961	1961	Yes	Turkey	NA	Turkey	Asia	Western Asia	Middle East	Human	Unknown	NA	S. enterica	Paratyphi B	Present	Not available	aroC(2)	dnaN(14)	hemD(24)	hisD(14)	purE(37)	sucA(19)	thrA(8)	86	Lineage 10	10.3	261538	261538	261538	261538	37812	1620	1620	1620	155	155	2	2	Susceptible			none	99.92	131.83	98.1965	4454302	278
438	67-70		1970	1970	Yes	Algeria	NA	Algeria	Africa	Northern Africa	Africa	Human	Blood	NA	S. enterica	Paratyphi B	Present	Not available	aroC(2)	dnaN(14)	hemD(24)	hisD(14)	purE(37)	sucA(19)	thrA(8)	86	Lineage 10	10.3.7_NorthAfrica2	263531	263531	263531	263531	37812	1620	1620	1620	155	155	2	2	Susceptible			none	99.54	101.91	98.6276	3332872	291
439	40-84	B84-353	1984	1984		France	No travel	France	Europe	Western Europe	Europe	Human	Unknown	NA	S. enterica	Paratyphi B	Present	Taunton	aroC(2)	dnaN(14)	hemD(24)	hisD(14)	purE(37)	sucA(19)	thrA(8)	86	Lineage 10	10.3.7_NorthAfrica2	289308	289308	289308	289308	37812	1620	1620	1620	155	155	2	2	Susceptible			none	99.58	134.94	97.9645	4650506	288
440	25-88	B88-682	1988	1988		France	Algeria	Algeria	Africa	Northern Africa	Africa	Human	Bile	NA	S. enterica	Paratyphi B	Present	Taunton	aroC(2)	dnaN(14)	hemD(24)	hisD(14)	purE(37)	sucA(19)	thrA(8)	86	Lineage 10	10.3.7_NorthAfrica2	341288	341288	341288	341288	37812	1620	1620	1620	155	155	2	2				none	99.58	203.46	97.4946	7844546	313
441	201006596		2010	2010		France	Morocco	Morocco	Africa	Northern Africa	Africa	Human	Stools	NA	S. enterica	Paratyphi B	Present	Not available	aroC(2)	dnaN(14)	hemD(24)	hisD(14)	purE(37)	sucA(19)	thrA(8)	86	Lineage 10	10.3.7_NorthAfrica2	341313	341313	341313	341313	37812	1620	1620	1620	155	155	2	2	Susceptible	6	0.016	none	98.8	86.93	96.0952	3956826	302
442	75-90	B90-513	1990	1990	Yes	France	Morocco	Morocco	Africa	Northern Africa	Africa	Human	Stools	NA	S. enterica	Paratyphi B	Present	3a	aroC(2)	dnaN(14)	hemD(24)	hisD(14)	purE(37)	sucA(19)	thrA(8)	86	Lineage 10	10.3.7_NorthAfrica2	341300	341300	341300	341300	37812	1620	1620	1620	155	155	2	2				none	99.59	84.62	94.8896	3948358	332
443	B97-9885		1997	1997		France	Algeria	Algeria	Africa	Northern Africa	Africa	Human	Stools	NA	S. enterica	Paratyphi B	Present	Not available	aroC(2)	dnaN(14)	hemD(24)	hisD(14)	purE(37)	sucA(19)	thrA(8)	86	Lineage 10	10.3.7_NorthAfrica2	261609	261609	261609	261580	37812	1620	1620	1620	155	155	2	2	(TET)	16	0.06	none	99.53	101.54	98.1584	3457604	286
444	200606439		2006	2006		France	Morocco	Morocco	Africa	Northern Africa	Africa	Human	Stools	NA	S. enterica	Paratyphi B	Present	Not available	aroC(2)	dnaN(14)	hemD(24)	hisD(14)	purE(37)	sucA(19)	thrA(8)	86	Lineage 10	10.3.7_NorthAfrica2	261580	261580	261580	261580	37812	1620	1620	1620	155	155	2	2	Susceptible	12	0.032	none	99.55	166.87	98.551	5607808	303
445	201108561		2011	2011	Yes	France	Morocco	Morocco	Africa	Northern Africa	Africa	Human	Blood	NA	S. enterica	Paratyphi B	Present	Not available	aroC(2)	dnaN(14)	hemD(24)	hisD(14)	purE(37)	sucA(19)	thrA(8)	86	Lineage 10	10.3.7_NorthAfrica2	341309	341309	341309	341309	37812	1620	1620	1620	155	155	2	2	Susceptible	8	0.023	none	99.57	59.87	93.725	2837114	336
446	42-90	B90-453	1990	1990		France	Morocco	Morocco	Africa	Northern Africa	Africa	Human	Stools	NA	S. enterica	Paratyphi B	Present	Taunton	aroC(2)	dnaN(14)	hemD(24)	hisD(14)	purE(37)	sucA(19)	thrA(8)	86	Lineage 10	10.3.7_NorthAfrica2	341298	341298	341298	261555	37812	1620	1620	1620	155	155	2	2				none	99.62	177.13	97.779	6823566	332
447	114-66	B66-1271	1966	1966		Morocco	NA	Morocco	Africa	Northern Africa	Africa	Human	Blood	NA	S. enterica	Paratyphi B	Present	Taunton	aroC(2)	dnaN(14)	hemD(24)	hisD(14)	purE(37)	sucA(19)	thrA(8)	86	Lineage 10	10.3.7_NorthAfrica2	341207	341207	261555	261555	37812	1620	1620	1620	155	155	2	2				none	99.78	181.47	96.7642	7065138	296
448	201607893		2016	2016		France	Morocco	Morocco	Africa	Northern Africa	Africa	Human	Blood	NA	S. enterica	Paratyphi B	Present	Not available	aroC(2)	dnaN(14)	hemD(24)	hisD(14)	purE(37)	sucA(19)	thrA(8)	86	Lineage 10	10.3.7_NorthAfrica2	341892	341892	341892	261555	37812	1620	1620	1620	155	155	2	2	Susceptible			none	99.6	122.37	98.3143	4111150	297
449	201202991		2012	2012		France	Morocco	Morocco	Africa	Northern Africa	Africa	Human	Blood	NA	S. enterica	Paratyphi B	Present	Not available	aroC(2)	dnaN(14)	hemD(24)	hisD(14)	purE(37)	sucA(19)	thrA(8)	86	Lineage 10	10.3.7_NorthAfrica2	261605	261605	261605	261605	37812	1620	1620	1620	155	155	2	2	Susceptible	6	0.012	none	99.55	106.77	98.1938	3602726	311
450	32-88	B88-756	1988	1988		France	Morocco	Morocco	Africa	Northern Africa	Africa	Human	Blood	NA	S. enterica	Paratyphi B	Present	Taunton	aroC(2)	dnaN(14)	hemD(24)	hisD(14)	purE(37)	sucA(19)	thrA(8)	86	Lineage 10	10.3.7_NorthAfrica2	341306	341306	341306	261555	37812	1620	1620	1620	155	155	2	2				none	99.54	229.79	97.4263	8855694	319
451	B91-359		1991	1991		France	NA	France	Europe	Western Europe	Europe	Animal	Clams	NA	S. enterica	Paratyphi B	Present	Taunton	aroC(2)	dnaN(14)	hemD(24)	hisD(14)	purE(37)	sucA(19)	thrA(8)	86	Lineage 10	10.3.7_NorthAfrica2	261619	261619	261619	261619	37812	1620	1620	1620	155	155	2	2	Susceptible			none	98.77	158.35	97.4026	7154596	331
452	201109301		2011	2011	Yes	France	Algeria	Algeria	Africa	Northern Africa	Africa	Human	Blood	NA	S. enterica	Paratyphi B	Present	Not available	aroC(2)	dnaN(14)	hemD(24)	hisD(14)	purE(37)	sucA(19)	thrA(8)	86	Lineage 10	10.3.7_NorthAfrica2	261599	261599	261599	261599	37812	1620	1620	1620	155	155	2	2	Susceptible	8	0.032	none	99.52	131.47	98.5537	4413290	285
453	135-73	B73-1555	1973	1973	Yes	France	Morocco	Morocco	Africa	Northern Africa	Africa	Human	Blood	NA	S. enterica	Paratyphi B	Present	Non typable	aroC(2)	dnaN(14)	hemD(24)	hisD(14)	purE(37)	sucA(19)	thrA(8)	86	Lineage 10	10.3.7_NorthAfrica2	261555	261555	261555	261555	37812	1620	1620	1620	155	155	2	2	Susceptible			none	99.48	82.62	98.7446	2875730	281
454	76-82	B82-981	1982	1982		France	Morocco	Morocco	Africa	Northern Africa	Africa	Human	Blood	NA	S. enterica	Paratyphi B	Present	Taunton	aroC(2)	dnaN(14)	hemD(24)	hisD(14)	purE(37)	sucA(19)	thrA(8)	86	Lineage 10	10.3.7_NorthAfrica2	341248	341248	341248	341248	37812	1620	1620	1620	155	155	2	2				none	99.58	64.92	96.8677	2963354	322
455	36-87	B87-546	1987	1987		France	Morocco	Morocco	Africa	Northern Africa	Africa	Human	Stools	NA	S. enterica	Paratyphi B	Present	Taunton	aroC(2)	dnaN(14)	hemD(24)	hisD(14)	purE(37)	sucA(19)	thrA(8)	86	Lineage 10	10.3.7_NorthAfrica2	341295	341295	341295	261610	37812	1620	1620	1620	155	155	2	2	Susceptible			none	99.59	104.44	96.9591	4782622	321
456	B98-7433		1998	1998		France	Morocco	Morocco	Africa	Northern Africa	Africa	Human	Stools	NA	S. enterica	Paratyphi B	Present	Dundee	aroC(2)	dnaN(14)	hemD(24)	hisD(14)	purE(37)	sucA(19)	thrA(8)	86	Lineage 10	10.3.7_NorthAfrica2	261610	261610	261610	261610	37812	1620	1620	1620	155	155	2	2	Susceptible			none	99.54	112.37	98.5084	3821036	294
457	201408568		2014	2014	Yes	France	Morocco	Morocco	Africa	Northern Africa	Africa	Human	Blood	NA	S. enterica	Paratyphi B	Present	Not available	aroC(2)	dnaN(14)	hemD(24)	hisD(14)	purE(37)	sucA(19)	thrA(8)	86	Lineage 10	10.3.7_NorthAfrica2	341326	341326	341326	341326	37812	1620	1620	1620	155	155	2	2	Susceptible			none	99.63	192.08	97.4776	7410200	339
458	46-89	B89-639	1989	1989	Yes	France	Morocco	Morocco	Africa	Northern Africa	Africa	Human	Blood	NA	S. enterica	Paratyphi B	Present	Taunton	aroC(2)	dnaN(14)	hemD(24)	hisD(14)	purE(37)	sucA(19)	thrA(8)	86	Lineage 10	10.3.7_NorthAfrica2	341277	341277	341277	261610	37812	1620	1620	1620	155	155	2	2				none	99.63	132.82	96.2872	5184522	321
459	53-89	B89-647	1989	1989		France	Morocco	Morocco	Africa	Northern Africa	Africa	Human	Blood	NA	S. enterica	Paratyphi B	Present	Taunton	aroC(2)	dnaN(14)	hemD(24)	hisD(14)	purE(37)	sucA(19)	thrA(8)	86	Lineage 10	10.3.7_NorthAfrica2	341279	341277	341277	261610	37812	1620	1620	1620	155	155	2	2				none	99.61	133.42	97.7805	5124682	328
460	B91-65		1990	1990	Yes	France	Morocco	Morocco	Africa	Northern Africa	Africa	Human	Stools	NA	S. enterica	Paratyphi B	Present	Taunton	aroC(2)	dnaN(14)	hemD(24)	hisD(14)	purE(37)	sucA(19)	thrA(8)	86	Lineage 10	10.3.7_NorthAfrica2	341299	341299	341299	341299	37812	1620	1620	1620	155	155	2	2				none	99.6	26.41	95.8238	1223318	308
461	200807047		2008	2008	Yes	France	Morocco	Morocco	Africa	Northern Africa	Africa	Human	Blood	NA	S. enterica	ND:b:1,2	Present	Not available	aroC(2)	dnaN(14)	hemD(24)	hisD(14)	purE(37)	sucA(19)	thrA(1358)	8506	Lineage 10	10.3.7_NorthAfrica2	261603	261603	261603	261603	37812	1620	1620	1620	155	155	2	2	Susceptible			none	99.55	108	97.9224	3501316	316
462	68-82	B82-960	1982	1982	Yes	France	Morocco	Morocco	Africa	Northern Africa	Africa	Human	Stools	NA	S. enterica	Paratyphi B	Present	Taunton	aroC(2)	dnaN(14)	hemD(24)	hisD(14)	purE(37)	sucA(19)	thrA(8)	86	Lineage 10	10.3.7_NorthAfrica2	341265	341265	341265	341265	37812	1620	1620	1620	155	155	2	2				none	99.58	117.47	96.983	5361128	307
463	103-84	B84-1063	1984	1984	Yes	France	Morocco	Morocco	Africa	Northern Africa	Africa	Human	Stools	NA	S. enterica	Paratyphi B	Present	Taunton	aroC(2)	dnaN(14)	hemD(24)	hisD(14)	purE(37)	sucA(19)	thrA(8)	86	Lineage 10	10.3.7_NorthAfrica2	341287	341287	341287	341287	37812	1620	1620	1620	155	155	2	2				none	99.6	173.2	97.301	7913040	307
464	200107167		2001	2001	Yes	France	Morocco	Morocco	Africa	Northern Africa	Africa	Human	Stools	NA	S. enterica	Paratyphi B	Present	Dundee	aroC(2)	dnaN(14)	hemD(24)	hisD(14)	purE(37)	sucA(19)	thrA(8)	86	Lineage 10	10.3.7_NorthAfrica2	261559	261559	261559	261559	37812	1620	1620	1620	155	155	2	2	Susceptible			none	99.54	110.56	98.1922	3771784	303
465	00-6504	B00-6504	2000	2000		France	Morocco	Morocco	Africa	Northern Africa	Africa	Human	Blood	NA	S. enterica	Paratyphi B	Present	Dundee	aroC(2)	dnaN(14)	hemD(24)	hisD(14)	purE(37)	sucA(19)	thrA(8)	86	Lineage 10	10.3.7_NorthAfrica2	341324	341324	341324	341324	37812	1620	1620	1620	155	155	2	2				none	99.58	71.1	97.8348	3213510	322
466	02-8042	B02-8042	2002	2002		France	Unknown	France or elsewhere	Unknown	Unknown	Unknown	Human	Blood	NA	S. enterica	Paratyphi B	Present	Taunton	aroC(2)	dnaN(14)	hemD(24)	hisD(14)	purE(37)	sucA(19)	thrA(8)	86	Lineage 10	10.3.7_NorthAfrica2	341316	341316	341316	341316	37812	1620	1620	1620	155	155	2	2	Susceptible			none	99.61	80.7	96.7198	3671170	321
467	05-4862		2005	2005	Yes	France	Morocco	Morocco	Africa	Northern Africa	Africa	Human	Blood	NA	S. enterica	Paratyphi B	Present	Not available	aroC(2)	dnaN(14)	hemD(24)	hisD(14)	purE(37)	sucA(19)	thrA(8)	86	Lineage 10	10.3.7_NorthAfrica2	341181	341181	341181	341181	37812	1620	1620	1620	155	155	2	2	Susceptible			none	99.65	110.85	97.9892	5781808	300
468	106-86	B86-926	1986	1986		France	Morocco	Morocco	Africa	Northern Africa	Africa	Human	Blood	NA	S. enterica	Paratyphi B	Present	3aI	aroC(2)	dnaN(14)	hemD(24)	hisD(14)	purE(37)	sucA(19)	thrA(8)	86	Lineage 10	10.3.7_NorthAfrica2	341269	341269	341269	341269	37812	1620	1620	1620	155	155	2	2				none	99.59	92.66	97.9217	4202696	328
469	131-86	B86-1134	1986	1986	Yes	France	Morocco	Morocco	Africa	Northern Africa	Africa	Human	Kyste	NA	S. enterica	Paratyphi B	Present	3aI	aroC(2)	dnaN(14)	hemD(24)	hisD(14)	purE(37)	sucA(19)	thrA(8)	86	Lineage 10	10.3.7_NorthAfrica2	341261	341261	341261	341261	37812	1620	1620	1620	155	155	2	2				none	99.59	62.01	97.475	2825848	329
470	39-90	B90-450	1990	1990		France	Morocco	Morocco	Africa	Northern Africa	Africa	Human	Stools	NA	S. enterica	Paratyphi B	Present	3aI	aroC(2)	dnaN(14)	hemD(24)	hisD(14)	purE(37)	sucA(19)	thrA(8)	86	Lineage 10	10.3.7_NorthAfrica2	341305	341305	341305	341305	37812	1620	1620	1620	155	155	2	2				none	99.6	123.89	98.6947	4715534	339
471	32-90	B90-592	1990	1990	Yes	France	NA	France	Europe	Western Europe	Europe	Human	Stools	NA	S. enterica	Paratyphi B	Present	Taunton	aroC(2)	dnaN(14)	hemD(24)	hisD(14)	purE(37)	sucA(19)	thrA(8)	86	Lineage 10	10.3.7_NorthAfrica2	341314	341314	341314	341314	37812	1620	1620	1620	155	155	2	2				none	99.56	177.08	97.5957	6813542	327
472	02-7168		2002	2002		France	Unknown	France or elsewhere	Unknown	Unknown	Unknown	Human	Stools	NA	S. enterica	Paratyphi B	Present	Taunton	aroC(2)	dnaN(14)	hemD(24)	hisD(14)	purE(37)	sucA(19)	thrA(8)	86	Lineage 10	10.3.7_NorthAfrica2	37812	37812	37812	37812	37812	1620	1620	1620	155	155	2	2	Susceptible			none	99.57	91.83	97.9398	4783368	308
473	37-88	B88-830	1988	1988		France	Algeria	Algeria	Africa	Northern Africa	Africa	Human	Blood	NA	S. enterica	Paratyphi B	Present	Taunton	aroC(2)	dnaN(14)	hemD(24)	hisD(14)	purE(37)	sucA(19)	thrA(8)	86	Lineage 10	10.3.7_NorthAfrica2	341276	341276	341276	341276	37812	1620	1620	1620	155	155	2	2				none	99.66	87.28	97.2164	3989272	324
474	99-7459	B99-7459	1999	1999		France	Morocco	Morocco	Africa	Northern Africa	Africa	Human	Blood	NA	S. enterica	Paratyphi B	Present	3aI	aroC(2)	dnaN(14)	hemD(24)	hisD(14)	purE(37)	sucA(19)	thrA(8)	86	Lineage 10	10.3.7_NorthAfrica2	341325	341325	341325	341278	37812	1620	1620	1620	155	155	2	2				none	99.54	132.25	97.3522	5113566	320
475	50-89	B89-644	1989	1989	Yes	France	Morocco	Morocco	Africa	Northern Africa	Africa	Human	Stools	NA	S. enterica	Paratyphi B	Present	RDNC	aroC(2)	dnaN(14)	hemD(24)	hisD(14)	purE(37)	sucA(19)	thrA(8)	86	Lineage 10	10.3.7_NorthAfrica2	341278	341278	341278	341278	37812	1620	1620	1620	155	155	2	2				none	99.71	120.63	96.8229	4686590	326
476	63-82	B82-925	1982	1982		France	NA	France	Europe	Western Europe	Europe	Human	Blood	NA	S. enterica	Paratyphi B	Present	Taunton	aroC(2)	dnaN(14)	hemD(24)	hisD(14)	purE(37)	sucA(19)	thrA(8)	86	Lineage 10	10.3.7_NorthAfrica2	341252	341252	341252	341252	37812	1620	1620	1620	155	155	2	2				none	99.57	72.74	97.0412	3347676	334
477	94-89	B89-822	1989	1989		France	Morocco	Morocco	Africa	Northern Africa	Africa	Human	Blood	NA	S. enterica	Paratyphi B	Present	Dundee	aroC(2)	dnaN(14)	hemD(24)	hisD(14)	purE(37)	sucA(19)	thrA(8)	86	Lineage 10	10.3.7_NorthAfrica2	341281	341281	341281	341278	37812	1620	1620	1620	155	155	2	2				none	99.62	210.01	96.0885	8218860	316
478	B94-8145		1994	1994		France	Morocco	Morocco	Africa	Northern Africa	Africa	Human	Blood	NA	S. enterica	Paratyphi B	Present	Taunton	aroC(2)	dnaN(14)	hemD(24)	hisD(14)	purE(37)	sucA(19)	thrA(8)	86	Lineage 10	10.3.7_NorthAfrica2	261595	261595	261595	261595	37812	1620	1620	1620	155	155	2	2	Susceptible			none	99.52	112.89	98.5633	3805608	294
479	200306909		2003	2003		France	Morocco	Morocco	Africa	Northern Africa	Africa	Human	Stools	NA	S. enterica	Paratyphi B	Present	Not available	aroC(2)	dnaN(14)	hemD(24)	hisD(14)	purE(37)	sucA(19)	thrA(8)	86	Lineage 10	10.3.7_NorthAfrica2	261571	261571	261571	261571	37812	1620	1620	1620	155	155	2	2	Susceptible			none	99.42	113.31	98.0902	3817124	300
480	00-6821	B00-6821	2000	2000		France	Morocco	Morocco	Africa	Northern Africa	Africa	Human	Stools	NA	S. enterica	Paratyphi B	Present	Dundee	aroC(2)	dnaN(14)	hemD(24)	hisD(14)	purE(37)	sucA(19)	thrA(8)	86	Lineage 10	10.3.7_NorthAfrica2	341308	341308	341308	341308	37812	1620	1620	1620	155	155	2	2				none	99.63	54.66	95.1006	2553714	323
481	57-90	B90-600	1990	1990		France	North Africa	ND (Northern Africa)	Africa	Northern Africa	Africa	Human	Blood	NA	S. enterica	Paratyphi B	Present	Dundee	aroC(2)	dnaN(14)	hemD(24)	hisD(14)	purE(37)	sucA(19)	thrA(8)	86	Lineage 10	10.3.7_NorthAfrica2	341303	341303	341294	341294	37812	1620	1620	1620	155	155	2	2				none	99.65	205.39	96.3711	8024740	323
482	55-89	B89-655	1989	1989		France	NA	France	Europe	Western Europe	Europe	Human	Unknown	NA	S. enterica	Paratyphi B	Present	Dundee	aroC(2)	dnaN(14)	hemD(24)	hisD(14)	purE(37)	sucA(19)	thrA(8)	86	Lineage 10	10.3.7_NorthAfrica2	341294	341294	341294	341294	37812	1620	1620	1620	155	155	2	2				none	99.75	228.15	97.0541	8844634	319
483	37-87	B87-548	1987	1987		France	NA	France	Europe	Western Europe	Europe	Human	Stools	NA	S. enterica	Paratyphi B	Present	RDNC	aroC(2)	dnaN(14)	hemD(24)	hisD(14)	purE(37)	sucA(19)	thrA(8)	86	Lineage 10	10.3.7_NorthAfrica2	341297	341297	341297	341297	37812	1620	1620	1620	155	155	2	2				none	99.57	133.5	96.8961	6069584	321
484	09-6120		2009	2009		France	Morocco	Morocco	Africa	Northern Africa	Africa	Human	Blood	NA	S. enterica	Paratyphi B	Present	Not available	aroC(2)	dnaN(14)	hemD(24)	hisD(14)	purE(37)	sucA(19)	thrA(8)	86	Lineage 10	10.3.7_NorthAfrica2	37836	37836	37836	37836	37812	1620	1620	1620	155	155	2	2	Susceptible			none	99.58	101.83	97.8327	5378518	310
485	40-87	B87-579	1987	1987	Yes	France	NA	France	Europe	Western Europe	Europe	Human	Blood	NA	S. enterica	Paratyphi B	Present	Taunton	aroC(2)	dnaN(14)	hemD(24)	hisD(14)	purE(37)	sucA(19)	thrA(8)	86	Lineage 10	10.3.7_NorthAfrica2	341273	341273	341273	341273	37812	1620	1620	1620	155	155	2	2				none	99.58	89.49	95.3122	4175718	328
486	145-75	B75-1294	1975	1975		Morocco	NA	Morocco	Africa	Northern Africa	Africa	Human	Blood	NA	S. enterica	Paratyphi B	Present	Taunton	aroC(2)	dnaN(14)	hemD(24)	hisD(14)	purE(37)	sucA(19)	thrA(8)	86	Lineage 10	10.3.7_NorthAfrica2	261612	261612	261612	261612	37812	1620	1620	1620	155	155	2	2	Susceptible			none	99.54	126.14	98.7964	4198866	301
487	200205663		2002	2002	Yes	France	Morocco	Morocco	Africa	Northern Africa	Africa	Human	Blood	NA	S. enterica	Paratyphi B	Present	Dundee	aroC(2)	dnaN(14)	hemD(24)	hisD(14)	purE(37)	sucA(19)	thrA(8)	86	Lineage 10	10.3.7_NorthAfrica2	261572	261572	261572	261572	37812	1620	1620	1620	155	155	2	2	Susceptible			none	99.53	182.66	98.4897	5988430	338
488	41-89	B89-613	1989	1989		France	NA	France	Europe	Western Europe	Europe	Human	Blood	NA	S. enterica	Paratyphi B	Present	Taunton	aroC(2)	dnaN(14)	hemD(24)	hisD(14)	purE(37)	sucA(19)	thrA(8)	86	Lineage 10	10.3.7_NorthAfrica2	341282	341282	341282	341282	37812	1620	1620	1620	155	155	2	2				none	99.53	133.69	95.2905	5272248	346
489	200705718		2007	2007	Yes	France	Turkey	Turkey	Asia	Western Asia	Middle East	Human	Stools	NA	S. enterica	Paratyphi B	Present	Not available	aroC(2)	dnaN(14)	hemD(24)	hisD(14)	purE(37)	sucA(19)	thrA(8)	86	Lineage 10	10.3.8	261587	261587	261587	261587	1857	1620	1620	1620	155	155	2	2	Susceptible			none	99.92	198.49	97.6632	6818112	261
490	143-78	B78-1204	1978	1978	Yes	France	Egypt	Egypt	Africa	Northern Africa	Middle East	Human	Stools	NA	S. enterica	Paratyphi B	Present	Dundee	aroC(2)	dnaN(14)	hemD(24)	hisD(14)	purE(37)	sucA(19)	thrA(8)	86	Lineage 10	10.3.8	289317	289317	289317	289317	1857	1620	1620	1620	155	155	2	2	STR			none	99.89	117.32	97.0547	4084216	244
491	117-79	B79-950	1979	1979	Yes	France	Syria	Syria	Asia	Western Asia	Middle East	Human	Blood	NA	S. enterica	Paratyphi B	Present	Dundee	aroC(2)	dnaN(14)	hemD(24)	hisD(14)	purE(37)	sucA(19)	thrA(8)	86	Lineage 10	10.3.8	289326	289326	289326	289326	1857	1620	1620	1620	155	155	2	2	Susceptible			none	99.93	124.81	97.2576	4229794	224
492	144-73	B73-1451	1973	1973	Yes	France	Lebanon	Lebanon	Asia	Western Asia	Middle East	Human	Blood	NA	S. enterica	Paratyphi B	Present	Dundee	aroC(2)	dnaN(14)	hemD(24)	hisD(14)	purE(37)	sucA(19)	thrA(8)	86	Lineage 10	10.3.8	261556	261556	261556	261556	1857	1620	1620	1620	155	155	2	2	Susceptible			none	99.9	84.99	97.4721	2981466	242
493	211-75		1975	1975	Yes	France	Iraq	Iraq	Asia	Western Asia	Middle East	Human	Blood	NA	S. enterica	Paratyphi B	Present	Not available	aroC(2)	dnaN(14)	hemD(24)	hisD(14)	purE(37)	sucA(19)	thrA(8)	86	Lineage 10	10.3.8	341241	341241	341241	341241	1857	1620	1620	1620	155	155	2	2				none	99.93	59.6	87.651	3027266	242
494	SARA43	DMS 220/82	1982	1982	Yes	Africa	NA	ND (Africa)	Africa	Africa_ND	Africa	Human	Unknown	NA	S. enterica	Paratyphi B	Present	Not available	aroC(2)	dnaN(14)	hemD(24)	hisD(14)	purE(37)	sucA(19)	thrA(8)	86	Lineage 10	10.3.8	42696	42696	42696	42696	1857	1620	1620	1620	155	155	2	2				none	99.94	116.06	92.1642	6562574	242
495	90-85	B85-987	1985	1985		France	No travel	France	Europe	Western Europe	Europe	Human	Blood	NA	S. enterica	Paratyphi B	Present	Dundee	aroC(2)	dnaN(14)	hemD(24)	hisD(14)	purE(37)	sucA(19)	thrA(8)	86	Lineage 10	10.3.8	289349	289349	289349	42696	1857	1620	1620	1620	155	155	2	2	Susceptible			none	99.92	125.36	97.0685	4362694	243
496	59-85	B85-862	1985	1985		France	NA	France	Europe	Western Europe	Europe	Human	Stools	NA	S. enterica	Paratyphi B	Present	Dundee	aroC(2)	dnaN(14)	hemD(24)	hisD(14)	purE(37)	sucA(19)	thrA(8)	86	Lineage 10	10.3.8	341254	341254	341254	341254	1857	1620	1620	1620	155	155	2	2	Susceptible			none	99.94	75.2	96.3626	3480620	250
497	116-86	B86-972	1986	1986	Yes	France	NA	France	Europe	Western Europe	Europe	Human	Blood	NA	S. enterica	Paratyphi B	Present	Dundee	aroC(2)	dnaN(14)	hemD(24)	hisD(14)	purE(37)	sucA(19)	thrA(8)	86	Lineage 10	10.3.8	341256	341256	341256	341256	1857	1620	1620	1620	155	155	2	2				none	99.89	47.69	94.4764	2250238	251
498	723623		2019	2019	Yes	United Kingdom	Pakistan	Pakistan	Asia	Southern Asia	Asia	Human	Blood	NA	S. enterica	Paratyphi B	Present	Not available	aroC(2)	dnaN(14)	hemD(24)	hisD(14)	purE(37)	sucA(19)	thrA(8)	86	Lineage 10	10.3.8.1_SouthAsia2	178827	178827	178827	178827	1857	1620	1620	1620	155	155	2	2				none	99.84	96.33	97.3173	4724962	273
499	304577		2016	2016		United Kingdom	India	India	Asia	Southern Asia	Asia	Human	Unknown	NA	S. enterica	Paratyphi B	Present	Not available	aroC(2)	dnaN(14)	hemD(24)	hisD(14)	purE(37)	sucA(19)	thrA(8)	86	Lineage 10	10.3.8.1_SouthAsia2	125860	125860	125860	125860	1857	1620	1620	1620	155	155	2	2				gyrA_S83F	99.85	84.64	97.5488	4076688	279
500	1137923		2010	2010		United Kingdom	Pakistan	Pakistan	Asia	Southern Asia	Asia	Human	Stools	NA	S. enterica	Paratyphi B	Present	Dundee	aroC(2)	dnaN(14)	hemD(24)	hisD(14)	purE(37)	sucA(19)	thrA(8)	86	Lineage 10	10.3.8.1_SouthAsia2	261998	261998	125860	125860	1857	1620	1620	1620	155	155	2	2				gyrA_S83F	99.85	98.32	92.4831	6104922	266
501	1136471		2010	2010	Yes	United Kingdom	Pakistan	Pakistan	Asia	Southern Asia	Asia	Human	Stools	NA	S. enterica	Paratyphi B	Present	Dundee	aroC(2)	dnaN(14)	hemD(24)	hisD(14)	purE(37)	sucA(19)	thrA(8)	86	Lineage 10	10.3.8.1_SouthAsia2	261999	261998	125860	125860	1857	1620	1620	1620	155	155	2	2				gyrA_S83F	99.52	87	97.7382	4877272	263
502	38-87	B57-554	1987	1987		France	NA	France	Europe	Western Europe	Europe	Human	Stools	NA	S. enterica	Paratyphi B	Present	Dundee	aroC(2)	dnaN(14)	hemD(24)	hisD(14)	purE(37)	sucA(19)	thrA(8)	86	Lineage 10	10.3.8	341251	341251	341251	341251	1857	1620	1620	1620	155	155	2	2				none	99.93	53.08	93.9939	2517722	258
503	201106616		2011	2011	Yes	France	Turkey	Turkey	Asia	Western Asia	Middle East	Human	Blood	NA	S. enterica	Paratyphi B	Present	Not available	aroC(2)	dnaN(14)	hemD(24)	hisD(14)	purE(37)	sucA(19)	thrA(8)	86	Lineage 10	10.3.8.2_Turkey3	261602	261602	17705	17705	1857	1620	1620	1620	155	155	2	2	Susceptible	4	0.016	none	99.88	145.99	97.6767	4929714	252
504	201006986		2010	2010		France	Turkey	Turkey	Asia	Western Asia	Middle East	Human	Blood	NA	S. enterica	Paratyphi B	Present	Not available	aroC(2)	dnaN(14)	hemD(24)	hisD(14)	purE(37)	sucA(19)	thrA(8)	86	Lineage 10	10.3.8.2_Turkey3	342239	342239	342239	17705	1857	1620	1620	1620	155	155	2	2	Susceptible	6	0.012	none	99.94	47.45	95.31	2213616	257
505	201005812		2010	2010	Yes	France	Turkey	Turkey	Asia	Western Asia	Middle East	Human	Blood	NA	S. enterica	Paratyphi B	Present	Not available	aroC(2)	dnaN(14)	hemD(24)	hisD(14)	purE(37)	sucA(19)	thrA(8)	86	Lineage 10	10.3.8.2_Turkey3	341292	341292	341292	17705	1857	1620	1620	1620	155	155	2	2	Susceptible	4	0.008	none	99.94	86.15	95.7047	4007388	261
506	201706695		2017	2017	Yes	France	Turkey	Turkey	Asia	Western Asia	Middle East	Human	Blood	NA	S. enterica	Paratyphi B	Present	Not available	aroC(2)	dnaN(14)	hemD(24)	hisD(14)	purE(37)	sucA(19)	thrA(8)	86	Lineage 10	10.3.8.2_Turkey3	32237	17705	17705	17705	1857	1620	1620	1620	155	155	2	2	Susceptible	4	0.008	none	99.89	94.6	93.9808	3277366	248
507	421207		2017	2017		United Kingdom	Turkey	Turkey	Asia	Western Asia	Middle East	Human	Unknown	NA	S. enterica	Paratyphi B	Present	Not available	aroC(2)	dnaN(14)	hemD(24)	hisD(14)	purE(37)	sucA(19)	thrA(8)	86	Lineage 10	10.3.8.2_Turkey3	32237	17705	17705	17705	1857	1620	1620	1620	155	155	2	2				none	99.94	118.2	97.2948	5737348	268
508	201610803		2016	2016		France	Turkey	Turkey	Asia	Western Asia	Middle East	Human	Blood	NA	S. enterica	Paratyphi B	Present	Not available	aroC(2)	dnaN(14)	hemD(24)	hisD(14)	purE(37)	sucA(19)	thrA(8)	86	Lineage 10	10.3.8.2_Turkey3	341886	17705	17705	17705	1857	1620	1620	1620	155	155	2	2	Susceptible			none	99.57	73.72	97.6489	2408286	248
509	201005693		2010	2010		France	Turkey	Turkey	Asia	Western Asia	Middle East	Human	Blood	NA	S. enterica	Paratyphi B	Present	Not available	aroC(2)	dnaN(14)	hemD(24)	hisD(14)	purE(37)	sucA(19)	thrA(8)	86	Lineage 10	10.3.8.2_Turkey3	341922	341922	17705	17705	1857	1620	1620	1620	155	155	2	2	NAL (CIP)	≥ 256	0.125	gyrA_D87N	99.94	179.38	97.4273	6051960	254
510	09-6723		2009	2009		France	Turkey	Turkey	Asia	Western Asia	Middle East	Human	Blood	NA	S. enterica	Paratyphi B	Present	Not available	aroC(2)	dnaN(14)	hemD(24)	hisD(14)	purE(37)	sucA(19)	thrA(8)	86	Lineage 10	10.3.8.2_Turkey3	32228	17705	17705	17705	1857	1620	1620	1620	155	155	2	2	Susceptible			none	99.94	88.65	97.1513	4648394	250
511	201508837		2015	2015	Yes	France	Turkey	Turkey	Asia	Western Asia	Middle East	Human	Blood	NA	S. enterica	Paratyphi B	Present	Not available	aroC(2)	dnaN(14)	hemD(24)	hisD(14)	purE(37)	sucA(19)	thrA(8)	86	Lineage 10	10.3.8.2_Turkey3	261615	261615	17705	17705	1857	1620	1620	1620	155	155	2	2	Susceptible			none	99.93	115.38	97.372	3962912	253
512	201807193		2018	2018		France	Turkey	Turkey	Asia	Western Asia	Middle East	Human	Blood	NA	S. enterica	Paratyphi B	Present	Not available	aroC(2)	dnaN(14)	hemD(24)	hisD(14)	purE(37)	sucA(19)	thrA(8)	86	Lineage 10	10.3.8.2_Turkey3	341943	17705	17705	17705	1857	1620	1620	1620	155	155	2	2	Susceptible	2	0.012	none	99.89	116.48	97.5913	3924520	262
513	201006170		2010	2010		France	Turkey	Turkey	Asia	Western Asia	Middle East	Human	Blood	NA	S. enterica	Paratyphi B	Present	Not available	aroC(2)	dnaN(14)	hemD(24)	hisD(14)	purE(37)	sucA(19)	thrA(8)	86	Lineage 10	10.3.8.2_Turkey3	341283	341283	341283	17705	1857	1620	1620	1620	155	155	2	2	Susceptible	6	0.012	none	99.94	62.24	96.3452	2882562	260
514	201005837		2010	2010		France	Turkey	Turkey	Asia	Western Asia	Middle East	Human	Blood	NA	S. enterica	Paratyphi B	Present	Not available	aroC(2)	dnaN(14)	hemD(24)	hisD(14)	purE(37)	sucA(19)	thrA(8)	86	Lineage 10	10.3.8.2_Turkey3	341293	341293	17705	17705	1857	1620	1620	1620	155	155	2	2	Susceptible	4	0.012	none	99.94	85.98	95.3874	3997392	255
515	200704851		2007	2007		France	Turkey	Turkey	Asia	Western Asia	Middle East	Human	Blood	NA	S. enterica	Paratyphi B	Present	Not available	aroC(2)	dnaN(14)	hemD(24)	hisD(14)	purE(37)	sucA(19)	thrA(8)	86	Lineage 10	10.3.8.2_Turkey3	32228	17705	17705	17705	1857	1620	1620	1620	155	155	2	2	Susceptible			none	99.92	136.94	97.3762	4718344	248
516	09-5700		2009	2009		France	Turkey	Turkey	Asia	Western Asia	Middle East	Human	Stools	NA	S. enterica	Paratyphi B	Present	Not available	aroC(2)	dnaN(14)	hemD(24)	hisD(14)	purE(37)	sucA(19)	thrA(8)	86	Lineage 10	10.3.8.2_Turkey3	32228	17705	17705	17705	1857	1620	1620	1620	155	155	2	2	Susceptible			none	99.88	87.9	97.2215	4657216	250
517	201007762		2010	2010		France	Turkey	Turkey	Asia	Western Asia	Middle East	Human	Stools	NA	S. enterica	Paratyphi B	Present	Not available	aroC(2)	dnaN(14)	hemD(24)	hisD(14)	purE(37)	sucA(19)	thrA(8)	86	Lineage 10	10.3.8.2_Turkey3	341318	341318	17705	17705	1857	1620	1620	1620	155	155	2	2	Susceptible	4	0.016	none	99.94	91.21	96.3724	4229368	256
518	200806317		2008	2008	Yes	France	Turkey	Turkey	Asia	Western Asia	Middle East	Human	Blood	NA	S. enterica	Paratyphi B	Present	Not available	aroC(2)	dnaN(14)	hemD(24)	hisD(14)	purE(37)	sucA(19)	thrA(8)	86	Lineage 10	10.3.8.2_Turkey3	32228	17705	17705	17705	1857	1620	1620	1620	155	155	2	2	Susceptible			none	99.9	102.88	97.5032	3557554	245
519	201003876		2010	2010	Yes	France	No travel	France	Europe	Western Europe	Europe	Human	Blood	NA	S. enterica	Paratyphi B	Present	Not available	aroC(2)	dnaN(14)	hemD(24)	hisD(14)	purE(37)	sucA(19)	thrA(8)	86	Lineage 10	10.3.8.2_Turkey3	341304	341304	341304	17705	1857	1620	1620	1620	155	155	2	2	Susceptible	4	0.008	none	99.93	119.15	95.9208	5530368	252
520	H83580298		2008	2008		United Kingdom	Turkey	Turkey	Asia	Western Asia	Middle East	Human	Blood	NA	S. enterica	Paratyphi B	Present	Not available	aroC(2)	dnaN(14)	hemD(24)	hisD(14)	purE(37)	sucA(19)	thrA(8)	86	Lineage 10	10.3.8.2_Turkey3	17705	17705	17705	17705	1857	1620	1620	1620	155	155	2	2				none	99.94	69.64	94.4571	6497808	249
521	201106792		2011	2011		France	Turkey	Turkey	Asia	Western Asia	Middle East	Human	Blood	NA	S. enterica	Paratyphi B	Present	Not available	aroC(2)	dnaN(14)	hemD(24)	hisD(14)	purE(37)	sucA(19)	thrA(8)	86	Lineage 10	10.3.8.2_Turkey3	341916	341916	17705	17705	1857	1620	1620	1620	155	155	2	2	NAL (CIP)	≥ 256	0.125	gyrA_D87Y	99.92	223.25	97.2085	7498668	269
522	201710471		2017	2017	Yes	France	Turkey	Turkey	Asia	Western Asia	Middle East	Human	Blood	NA	S. enterica	Paratyphi B	Present	Not available	aroC(2)	dnaN(14)	hemD(24)	hisD(14)	purE(37)	sucA(19)	thrA(8)	86	Lineage 10	10.3.8.2_Turkey3	341930	341930	17705	17705	1857	1620	1620	1620	155	155	2	2	NAL (CIP)	≥ 256	0.38	gyrA_D87Y	99.79	90.77	97.23	3075050	241
523	201609244		2016	2016	Yes	France	Turkey	Turkey	Asia	Western Asia	Middle East	Human	Blood	NA	S. enterica	ND:b:1,2	Present	Not available	aroC(2)	dnaN(14)	hemD(24)	hisD(14)	purE(37)	sucA(19)	thrA(8)	86	Lineage 10	10.3.8.2_Turkey3	341881	341881	17705	17705	1857	1620	1620	1620	155	155	2	2	NAL (CIP)	≥ 256	0.25	gyrA_D87Y	99.7	100.04	97.5115	3384780	249
524	09-6106	WS1488	2009	2009		France	Turkey	Turkey	Asia	Western Asia	Middle East	Human	Stools	NA	S. enterica	Paratyphi B	Present	Not available	aroC(2)	dnaN(14)	hemD(24)	hisD(14)	purE(37)	sucA(19)	thrA(8)	86	Lineage 10	10.3.8.2_Turkey3	341913	341913	17705	17705	1857	1620	1620	1620	155	155	2	2	NAL (CIP)	256	0.125	gyrA_D87Y	99.93	153.77	97.4703	5221244	253
525	200906025		2009	2009	Yes	France	Turkey	Turkey	Asia	Western Asia	Middle East	Human	Blood	NA	S. enterica	Paratyphi B	Present	Not available	aroC(2)	dnaN(14)	hemD(24)	hisD(14)	purE(37)	sucA(19)	thrA(8)	86	Lineage 10	10.3.8.2_Turkey3	261586	17705	17705	17705	1857	1620	1620	1620	155	155	2	2	NAL (CIP)	≥ 256	0.125	gyrA_D87Y	99.89	109.64	97.6945	3807956	246
526	201006689		2010	2010		France	Turkey	Turkey	Asia	Western Asia	Middle East	Human	Blood	NA	S. enterica	Paratyphi B	Present	Not available	aroC(2)	dnaN(14)	hemD(24)	hisD(14)	purE(37)	sucA(19)	thrA(8)	86	Lineage 10	10.3.8.2_Turkey3	341315	341315	341315	17705	1857	1620	1620	1620	155	155	2	2	NAL (CIP)	≥ 256	0.125	gyrA_D87Y	99.94	143.04	93.1298	6819530	260
527	201307935		2013	2013		France	Turkey	Turkey	Asia	Western Asia	Middle East	Human	Blood	NA	S. enterica	Paratyphi B	Present	Not available	aroC(2)	dnaN(14)	hemD(24)	hisD(14)	purE(37)	sucA(19)	thrA(8)	86	Lineage 10	10.3.8.2_Turkey3	341290	341290	341290	341290	1857	1620	1620	1620	155	155	2	2	NAL (CIP)	≥ 256	0.19	gyrA_D87Y	99.93	24.63	94.0894	1165016	261
528	535359		2018	2018		United Kingdom	Iraq	Iraq	Asia	Western Asia	Middle East	Human	Stools	NA	S. enterica	Paratyphi B	Present	Not available	aroC(2)	dnaN(14)	hemD(24)	hisD(14)	purE(37)	sucA(19)	thrA(8)	86	Lineage 10	10.3.8.3_MiddleEast3	113445	113445	113445	113445	53828	1620	1620	1620	155	155	2	2				none	99.94	50.7	98.2533	2417158	258
529	541373		2018	2018	Yes	United Kingdom	Iraq	Iraq	Asia	Western Asia	Middle East	Human	Blood	NA	S. enterica	Paratyphi B	Present	Not available	aroC(2)	dnaN(14)	hemD(24)	hisD(14)	purE(37)	sucA(19)	thrA(8)	86	Lineage 10	10.3.8.3_MiddleEast3	113445	113445	113445	113445	53828	1620	1620	1620	155	155	2	2				none	99.91	48.35	92.4837	2451882	276
530	452518		2017	2017		United Kingdom	Iraq	Iraq	Asia	Western Asia	Middle East	Human	Blood	NA	S. enterica	Paratyphi B	Present	Not available	aroC(2)	dnaN(14)	hemD(24)	hisD(14)	purE(37)	sucA(19)	thrA(8)	86	Lineage 10	10.3.8.3_MiddleEast3	113445	113445	113445	113445	53828	1620	1620	1620	155	155	2	2				none	99.94	45.47	97.9137	2182152	262
531	201800797		2018	2018		France	Iraq	Iraq	Asia	Western Asia	Middle East	Human	Blood	NA	S. enterica	Paratyphi B	Present	Not available	aroC(2)	dnaN(14)	hemD(24)	hisD(14)	purE(37)	sucA(19)	thrA(8)	86	Lineage 10	10.3.8.3_MiddleEast3	341944	113445	113445	113445	53828	1620	1620	1620	155	155	2	2	Susceptible	8	0.012	none	99.83	102.32	98.5257	3415968	241
532	529880		2018	2018		United Kingdom	Iraq	Iraq	Asia	Western Asia	Middle East	Human	Stools	NA	S. enterica	Paratyphi B	Present	Not available	aroC(2)	dnaN(14)	hemD(24)	hisD(14)	purE(37)	sucA(19)	thrA(8)	86	Lineage 10	10.3.8.3_MiddleEast3	113445	113445	113445	113445	53828	1620	1620	1620	155	155	2	2				none	99.94	75.12	97.5207	3623972	263
533	22-80	B80-410	1980	1980		Iraq	NA	Iraq	Asia	Western Asia	Middle East	Human	Blood	NA	S. enterica	Paratyphi B	Present	Taunton	aroC(2)	dnaN(14)	hemD(24)	hisD(14)	purE(37)	sucA(19)	thrA(8)	86	Lineage 10	10.3.8.4_MiddleEast4	289309	289309	289309	289309	289309	1620	1620	1620	155	155	2	2				none	99.8	154.28	97.5911	5162532	307
534	200006752		2000	2000		France	Turkey	Turkey	Asia	Western Asia	Middle East	Human	Blood	NA	S. enterica	Paratyphi B	Present	Dundee	aroC(2)	dnaN(14)	hemD(24)	hisD(14)	purE(37)	sucA(19)	thrA(8)	86	Lineage 10	10.3.8.4_MiddleEast4	261576	261576	261576	246822	1857	1620	1620	1620	155	155	2	2	Susceptible			none	99.89	120.4	97.0485	4144080	253
535	1008776		2020	2020	Yes	United Kingdom	Turkey	Turkey	Asia	Western Asia	Middle East	Human	Stools	NA	S. enterica	Paratyphi B	Present	Not available	aroC(2)	dnaN(14)	hemD(24)	hisD(14)	purE(37)	sucA(19)	thrA(8)	86	Lineage 10	10.3.8.4_MiddleEast4	246822	246822	246822	246822	1857	1620	1620	1620	155	155	2	2				none	99.94	124.76	95.2815	6227694	281
536	201907724		2019	2019		France	Turkey	Turkey	Asia	Western Asia	Middle East	Human	Blood	NA	S. enterica	Paratyphi B	Present	Not available	aroC(2)	dnaN(14)	hemD(24)	hisD(14)	purE(37)	sucA(19)	thrA(8)	86	Lineage 10	10.3.8.4_MiddleEast4	342095	342095	342095	246822	1857	1620	1620	1620	155	155	2	2	Susceptible	4	0.012	none	99.92	112.45	97.172	3761402	266
537	B97-8064		1997	1997		France	Turkey	Turkey	Asia	Western Asia	Middle East	Human	Blood	NA	S. enterica	Paratyphi B	Present	Not available	aroC(2)	dnaN(14)	hemD(24)	hisD(14)	purE(37)	sucA(19)	thrA(8)	86	Lineage 10	10.3.8.4_MiddleEast4	261598	261598	261596	261596	1857	1620	1620	1620	155	155	2	2	Susceptible			none	99.88	119.89	97.4878	4115650	246
538	B94-8105		1994	1994	Yes	France	Turkey	Turkey	Asia	Western Asia	Middle East	Human	Blood	NA	S. enterica	Paratyphi B	Present	Dundee	aroC(2)	dnaN(14)	hemD(24)	hisD(14)	purE(37)	sucA(19)	thrA(8)	86	Lineage 10	10.3.8.4_MiddleEast4	261596	261596	261596	261596	1857	1620	1620	1620	155	155	2	2	Susceptible			none	99.86	124.33	97.3392	4272290	264
539	200606302		2006	2006		France	Turkey	Turkey	Asia	Western Asia	Middle East	Human	Stools	NA	S. enterica	Paratyphi B	Present	Not available	aroC(2)	dnaN(14)	hemD(24)	hisD(14)	purE(37)	sucA(19)	thrA(8)	86	Lineage 10	10.3.8.4_MiddleEast4	261613	261613	261613	261596	1857	1620	1620	1620	155	155	2	2	Susceptible			none	99.92	118.24	97.4021	4056476	274
540	77-89	B89-708	1989	1989	Yes	France	Turkey	Turkey	Asia	Western Asia	Middle East	Human	Blood	NA	S. enterica	Paratyphi B	Present	Taunton	aroC(2)	dnaN(14)	hemD(24)	hisD(14)	purE(37)	sucA(19)	thrA(8)	86	Lineage 10	10.3.8.4_MiddleEast4	341266	341266	261613	261596	1857	1620	1620	1620	155	155	2	2				none	99.94	82.01	95.2353	3250414	258
541	22-59	B59-1486	1959	1959	Yes	Luxembourg	NA	Luxembourg	Europe	Western Europe	Europe	Unknown		NA	S. enterica	Paratyphi B	Present	Taunton	aroC(2)	dnaN(14)	hemD(24)	hisD(14)	purE(37)	sucA(19)	thrA(8)	86	Lineage 10	10.3.8.5_EuropeNorthAfrica	290784	290784	290784	289302	1857	1620	1620	1620	155	155	2	2	Susceptible			none	98.86	85.23	98.4491	2777760	224
542	169-74	B74-1896	1974	1974		France	NA	France	Europe	Western Europe	Europe	Human	Stools	NA	S. enterica	Paratyphi B	Present	Taunton	aroC(2)	dnaN(14)	hemD(24)	hisD(14)	purE(37)	sucA(19)	thrA(8)	86	Lineage 10	10.3.8.5_EuropeNorthAfrica	341267	341267	289302	289302	1857	1620	1620	1620	155	155	2	2				none	99.94	201.73	97.6072	7799366	227
543	4-57	B57-636	1957	1957	Yes	France	NA	France	Europe	Western Europe	Europe	Human	Stools	NA	S. enterica	Paratyphi B	Present	Taunton	aroC(2)	dnaN(14)	hemD(24)	hisD(14)	purE(37)	sucA(19)	thrA(8)	86	Lineage 10	10.3.8.5_EuropeNorthAfrica	289302	289302	289302	289302	1857	1620	1620	1620	155	155	2	2	Susceptible			none	99.93	133.81	97.306	4651622	224
544	87-76	B76-1222	1976	1976	Yes	France	NA	France	Europe	Western Europe	Europe	Environment	River water	Canal de la Sambre (Jeumont)	S. enterica	Paratyphi B	Present	Taunton	aroC(2)	dnaN(14)	hemD(24)	hisD(14)	purE(37)	sucA(19)	thrA(8)	86	Lineage 10	10.3.8.5_EuropeNorthAfrica	289698	289698	289698	289698	1857	1620	1620	1620	155	155	2	2				none	99.92	157.61	97.67	5381922	234
545	42-84	B84-362	1984	1984	Yes	France	NA	France	Europe	Western Europe	Europe	Environment	River water	Canal de la Sambre	S. enterica	Paratyphi B	Present	Taunton	aroC(2)	dnaN(14)	hemD(24)	hisD(14)	purE(37)	sucA(19)	thrA(8)	86	Lineage 10	10.3.8.5_EuropeNorthAfrica	289300	289300	289300	289300	1857	1620	1620	1620	155	155	2	2	Susceptible			none	99.87	75	98.1091	2606312	227
546	09-1009		2009	2009		France	Egypt	Egypt	Africa	Northern Africa	Middle East	Human	Blood	NA	S. enterica	Paratyphi B	Present	Not available	aroC(2)	dnaN(14)	hemD(24)	hisD(14)	purE(37)	sucA(19)	thrA(8)	86	Lineage 10	10.3.8.5_EuropeNorthAfrica	37835	37835	37835	37835	1857	1620	1620	1620	155	155	2	2	Susceptible			none	99.93	97.99	97.7912	5132030	256
547	72-74	B74-942	1974	1974		France	NA	France	Europe	Western Europe	Europe	Human	Blood	NA	S. enterica	Paratyphi B	Present	Taunton	aroC(2)	dnaN(14)	hemD(24)	hisD(14)	purE(37)	sucA(19)	thrA(8)	86	Lineage 10	10.3.8.5_EuropeNorthAfrica	341234	341234	341234	289302	1857	1620	1620	1620	155	155	2	2				none	99.79	109.43	97.4864	4230052	245
548	201510469		2015	2015		France	No travel	France	Europe	Western Europe	Europe	Human	Blood	NA	S. enterica	Paratyphi B	Present	Not available	aroC(2)	dnaN(14)	hemD(24)	hisD(14)	purE(37)	sucA(19)	thrA(8)	86	Lineage 10	10.3.8.5_EuropeNorthAfrica	261591	261591	261591	261591	1857	1620	1620	1620	155	155	2	2	NAL (CIP)	≥ 256	0.125	gyrA_S83F	99.82	128.71	98.4047	4386880	258
549	201106546		2011	2011		France	No travel	France	Europe	Western Europe	Europe	Human	Stools	NA	S. enterica	Paratyphi B	Present	Not available	aroC(2)	dnaN(14)	hemD(24)	hisD(14)	purE(37)	sucA(19)	thrA(8)	86	Lineage 10	10.3.8.5_EuropeNorthAfrica	261604	261604	261604	261591	1857	1620	1620	1620	155	155	2	2	NAL (CIP)	≥ 256	0.25	gyrA_S83F	99.87	158.46	98.7072	5317138	249
550	34-67	B67-640	1967	1967		France	NA	France	Europe	Western Europe	Europe	Human	Stools	NA	S. enterica	Paratyphi B	Present	Taunton	aroC(2)	dnaN(14)	hemD(24)	hisD(14)	purE(37)	sucA(19)	thrA(8)	86	Lineage 10	10.3.8.5_EuropeNorthAfrica	341233	341233	341233	289302	1857	1620	1620	1620	155	155	2	2				none	99.94	156.53	95.3452	6203188	266
551	13-59	B59-1173	1959	1959	Yes	France	NA	France	Europe	Western Europe	Europe	Human	Stools	NA	S. enterica	Paratyphi B	Present	Taunton	aroC(2)	dnaN(14)	hemD(24)	hisD(14)	purE(37)	sucA(19)	thrA(8)	86	Lineage 10	10.3.8.5_EuropeNorthAfrica	341188	341188	341188	289302	1857	1620	1620	1620	155	155	2	2				none	99.94	251.06	97.7347	9686408	228
552	88-84	B84-888	1984	1984		France	Algeria	Algeria	Africa	Northern Africa	Africa	Human	Blood	NA	S. enterica	Paratyphi B	Present	Taunton	aroC(2)	dnaN(14)	hemD(24)	hisD(14)	purE(37)	sucA(19)	thrA(8)	86	Lineage 10	10.3.8.5_EuropeNorthAfrica	341284	341284	341284	341284	1857	1620	1620	1620	155	155	2	2				none	99.94	120.75	96.9753	5516982	256
553	70-86	B86-675	1986	1986	Yes	France	Algeria	Algeria	Africa	Northern Africa	Africa	Human	Blood	NA	S. enterica	Paratyphi B	Present	3aI	aroC(2)	dnaN(14)	hemD(24)	hisD(14)	purE(37)	sucA(19)	thrA(8)	86	Lineage 10	10.3.8.5_EuropeNorthAfrica	261557	261557	261557	261557	1857	1620	1620	1620	155	155	2	2	Susceptible			none	99.87	133.46	98.2381	4534472	246
554	45-88	B88-906	1988	1988		France	NA	France	Europe	Western Europe	Europe	Human	Stools	NA	S. enterica	Paratyphi B	Present	Taunton	aroC(2)	dnaN(14)	hemD(24)	hisD(14)	purE(37)	sucA(19)	thrA(8)	86	Lineage 10	10.3.8.5_EuropeNorthAfrica	341301	341301	341301	341301	1857	1620	1620	1620	155	155	2	2				none	99.94	112.64	92.9421	5357872	261
555	14-60	B60-920	1960	1960	Yes	France	NA	France	Europe	Western Europe	Europe	Human	Blood	NA	S. enterica	Paratyphi B	Present	Taunton	aroC(2)	dnaN(14)	hemD(24)	hisD(14)	purE(37)	sucA(19)	thrA(8)	86	Lineage 10	10.3.8.5_EuropeNorthAfrica	290785	290785	290785	289302	1857	1620	1620	1620	155	155	2	2	Susceptible			none	99.88	123.8	97.793	4117668	228
556	44-66	B66-653	1966	1966		France	NA	France	Europe	Western Europe	Europe	Human	Stools	NA	S. enterica	Paratyphi B	Present	Taunton	aroC(2)	dnaN(14)	hemD(24)	hisD(14)	purE(37)	sucA(19)	thrA(8)	86	Lineage 10	10.3.8.5_EuropeNorthAfrica	341213	341213	341213	341193	1857	1620	1620	1620	155	155	2	2				none	99.39	131.58	95.3448	5182176	239
557	88-65	B65-1376	1965	1965		France	NA	France	Europe	Western Europe	Europe	Human	Stools	NA	S. enterica	Paratyphi B	Present	Taunton	aroC(2)	dnaN(14)	hemD(24)	hisD(14)	purE(37)	sucA(19)	thrA(8)	86	Lineage 10	10.3.8.5_EuropeNorthAfrica	341193	341193	341193	341193	1857	1620	1620	1620	155	155	2	2	Susceptible			none	99.94	106.12	96.4114	4880640	236
558	89-65	B66-1	1965	1965		France	NA	France	Europe	Western Europe	Europe	Human	Stools	NA	S. enterica	Paratyphi B	Present	Taunton	aroC(2)	dnaN(14)	hemD(24)	hisD(14)	purE(37)	sucA(19)	thrA(8)	86	Lineage 10	10.3.8.5_EuropeNorthAfrica	341196	341196	341196	341193	1857	1620	1620	1620	155	155	2	2	Susceptible			none	99.94	217.12	96.2938	8514558	234
559	2-66	B66-35	1966	1966	Yes	France	NA	France	Europe	Western Europe	Europe	Human	Stools	NA	S. enterica	Paratyphi B	Present	Taunton	aroC(2)	dnaN(14)	hemD(24)	hisD(14)	purE(37)	sucA(19)	thrA(8)	86	Lineage 10	10.3.8.5_EuropeNorthAfrica	341212	341196	341196	341193	1857	1620	1620	1620	155	155	2	2	Susceptible			none	99.17	188.72	97.3871	7263852	230
560	28-59	B59-1592	1959	1959	Yes	France	Algeria	Algeria	Africa	Northern Africa	Africa	Human	Blood	NA	S. enterica	Paratyphi B	Present	Taunton	aroC(2)	dnaN(14)	hemD(24)	hisD(14)	purE(37)	sucA(19)	thrA(8)	86	Lineage 10	10.3.8.5_EuropeNorthAfrica	341200	341200	341198	289302	1857	1620	1620	1620	155	155	2	2				none	99.94	179.09	97.1882	6949662	229
561	95-67	B67-151	1967	1967		France	Algeria	Algeria	Africa	Northern Africa	Africa	Human	Stools	NA	S. enterica	Paratyphi B	Present	Taunton	aroC(2)	dnaN(14)	hemD(24)	hisD(14)	purE(37)	sucA(19)	thrA(8)	86	Lineage 10	10.3.8.5_EuropeNorthAfrica	341218	341218	341218	289302	1857	1620	1620	1620	155	155	2	2	Susceptible			none	99.94	179.73	97.9561	6919666	246
562	6-60	B60-29	1960	1960		France	Algeria	Algeria	Africa	Northern Africa	Africa	Human	Unknown	NA	S. enterica	Paratyphi B	Present	Taunton	aroC(2)	dnaN(14)	hemD(24)	hisD(14)	purE(37)	sucA(19)	thrA(8)	86	Lineage 10	10.3.8.5_EuropeNorthAfrica	341198	341198	341198	289302	1857	1620	1620	1620	155	155	2	2	Susceptible			none	99.94	154.38	97.2598	5986876	232
563	B90-23		1990	1990	Yes	France	NA	France	Europe	Western Europe	Europe	Environment	River water	NA	S. enterica	Paratyphi B	Present	Taunton	aroC(2)	dnaN(14)	hemD(24)	hisD(14)	purE(37)	sucA(19)	thrA(8)	86	Lineage 10	10.3.8.5_EuropeNorthAfrica	261588	261588	261588	261588	1857	1620	1620	1620	155	155	2	2	Susceptible			none	99.92	121.98	98.2219	4199730	236
564	24bis-59	B59-1521	1959	1959		France	NA	France	Europe	Western Europe	Europe	Human	Blood	NA	S. enterica	Paratyphi B	Present	Taunton	aroC(2)	dnaN(14)	hemD(24)	hisD(14)	purE(37)	sucA(19)	thrA(8)	86	Lineage 10	10.3.8.5_EuropeNorthAfrica	290786	290786	290786	289302	1857	1620	1620	1620	155	155	2	2	Susceptible			none	99.91	115.62	98.5417	3818618	229
565	131-75	B75-1147	1975	1975	Yes	France	NA	France	Europe	Western Europe	Europe	Human	Blood	NA	S. enterica	Paratyphi B	Present	Dundee	aroC(2)	dnaN(14)	hemD(24)	hisD(14)	purE(37)	sucA(19)	thrA(8)	86	Lineage 10	10.3.8.5_EuropeNorthAfrica	341264	341264	341264	341264	1857	1620	1620	1620	155	155	2	2				none	99.93	135.77	96.914	6227806	244
566	26-67	B67-262	1967	1967	Yes	France	Algeria	Algeria	Africa	Northern Africa	Africa	Human	Blood	NA	S. enterica	Paratyphi B	Present	Taunton	aroC(2)	dnaN(14)	hemD(24)	hisD(14)	purE(37)	sucA(19)	thrA(8)	86	Lineage 10	10.3.8.5_EuropeNorthAfrica	341215	341215	341215	289302	1857	1620	1620	1620	155	155	2	2				none	99.94	159.26	97.3972	6163488	235
567	201705796		2017	2017	Yes	France	Unknown	France or elsewhere	Unknown	Unknown	Unknown	Human	Blood	NA	S. enterica	Paratyphi B	Present	Not available	aroC(2)	dnaN(14)	hemD(24)	hisD(14)	purE(37)	sucA(19)	thrA(8)	86	Lineage 10	10.3.8.5_EuropeNorthAfrica	256896	256896	256896	256896	1857	1620	1620	1620	155	155	2	2	Susceptible			none	99.73	221	98.2213	7380700	248
568	172-74	B74-1931	1974	1974		France	NA	France	Europe	Western Europe	Europe	Environment	Sea water	Boulogne	S. enterica	Paratyphi B	Present	Taunton	aroC(2)	dnaN(14)	hemD(24)	hisD(14)	purE(37)	sucA(19)	thrA(8)	86	Lineage 10	10.3.8.5_EuropeNorthAfrica	289323	289323	289323	289302	1857	1620	1620	1620	155	155	2	2	Susceptible			none	99.94	153.08	97.9766	5279738	228
Outgroup	201906085		2019	NA		France	No travel	France	Europe	Western Europe	NA	Human	Stools	NA	S. enterica	Paratyphi B var. Java	Absent	Not applicable	aroC(2)	dnaN(2)	hemD(24)	hisD(14)	purE(2)	sucA(19)	thrA(8)	110	PG2
Outgroup	SPB7	SGSC4150	2002	NA		Malaysia	NA	Malaysia	Asia	South-eastern Asia	NA	Human	Stools	NA	S. enterica	Paratyphi B var. Java	Absent	Not applicable	aroC(2)	dnaN(14)	hemD(24)	hisD(14)	purE(2)	sucA(19)	thrA(107)	307	PG3
Num, number; NAL, nalidixic acid; CIP, ciprofloxacin; MIC, minimum inhibitory concentration; SNV, single nucleotide variant
[truncated: 10 more columns]
