# Supplementary material for: Genomic perspective on the bacillus causing paratyphoid B fever
Source: Research Square preprint supplement (doi:10.21203/rs.3.rs-4502330/v1), 2024-06-18
Supplement: Supplementary file 8 [file d6a14209101d9590d151ea9f.xlsx]

## Sheet: Data 7
			Connor et al. mBio. 2016		This study
Internal name	Accession no.	Strain name	MLST type	Phylogroup (PG)	Serotype (inferred)	MLST type	PG	Comment
11893_2#39	ERR460133	1190=221K+222K	265	1		86
11893_2#41	ERR460135	B60-1917	267	1		86
11893_2#64	ERR460157	CIP A214	86	1
11893_2#65	ERR460158	01-7995	86	1
11893_2#73	ERR460166	09-5700	86	1
11893_2#74	ERR460167	02-7168	86	1
7712_6#16	ERR129867	20_PB-J	86	1		2134
11893_2#62	ERR460155	CIP 54-115	86	1
11893_2#66	ERR460159	04-6017	86	1
11893_2#67	ERR460160	06-6420	86	1
11893_2#70	ERR460163	05-4862	86	1
11893_2#71	ERR460164	09-1009	86	1
11893_2#72	ERR460165	09-6120	86	1
11893_2#75	ERR460168	09-6723	86	1
4502_3#1	ERR023396	H073700271	86	1
4502_3#2	ERR023397	H080320076	86	1
4502_3#3	ERR023398	H083580298	86	1
4502_3#6	ERR023401	H070540154v1	86	1
7712_6#38	ERR129889	43_PB-J	86	1
7712_6#39	ERR129890	44_PB-J	86	1
7712_6#40	ERR129891	H093680197	86	1
7712_6#41	ERR129892	H093720426	86	1
7712_6#42	ERR129893	H102320465	86	1
7712_6#43	ERR129894	H103520475	86	1
7712_6#44	ERR129895	H104060548	86	1
7712_6#45	ERR129896	H104240488	86	1
7712_6#46	ERR129897	H113700398	86	1
11893_2#38	ERR460132	346K	264	1		86
11893_2#61	ERR460154	HB3	772	1
11893_2#63	ERR460156	CIP 54.100	86	1
11893_2#68	ERR460161	248K	86	1
11893_2#69	ERR460162	3K	86	1
5886_7#1	ERR1276844	SARA41_FB_1	86	1
5886_7#2	ERR1276845	SARA46_FB_1	86	1
7712_6#19	ERR129870	24_PB-J	110	2
7712_6#20	ERR129871	25_PB-J	110	2
11893_2#33	ERR460127	B67-877	110	2
11893_2#35	ERR460129	09-7367	110	2
11893_2#36	ERR460130	09-7650	110	2
11893_2#57	ERR460150	09-6640	43	2		110
11940_1#35	ERR467030	09-6575	110	2
5886_7#7	ERR1276850	SARA55_FB_1	110	2
11893_2#34	ERR460128	09-2276	110	2
11893_2#40	ERR460134	7K	266	2		110		Probable inversion with a PG2 isolate during the study by Connor et al, redone in our study as ST86 PG1
11439_1#96	ERR403712	1997/PB44*	43	3
5886_8#5	ERR1276855	SARA47_FB_1	43	3			4
11893_2#51	ERR460144	02-0972	43	3
11893_2#52	ERR460145	02-2529	43	3
11893_2#53	ERR460146	02-3610	43	3
11893_2#56	ERR460149	09-3819	43	3			4
11893_2#58	ERR460151	09-4684	43	3
4502_3#7	ERR023402	H052280317v1	0	3		43
7712_6#14	ERR129865	18_PB-J	43	3
9471_8#11	ERR278707	H09244029802	43	3				EnteroBase quality control failed
9471_8#12	ERR278708	H09252032602	307	3		43		EnteroBase quality control failed
9471_8#13	ERR278709	H09254048401	43	3
9471_8#27	ERR278723	H09356056902	Nd	3		2545	4
9471_8#34	ERR278730	H123060338	307	3		43
9471_8#38	ERR278734	H122380540	43	3
9471_8#40	ERR278736	H121580365	43	3
9471_8#41	ERR278737	H122840597	43	3				EnteroBase quality control failed
9471_8#42	ERR278738	H115040582	43	3				EnteroBase quality control failed
9471_8#44	ERR278740	H115260464	43	3
9471_8#45	ERR278741	H114640724	307	3		43
9471_8#46	ERR278742	H113740569	0	3		43	4
9471_8#47	ERR278743	H113680452	43	3			4
9471_8#48	ERR278744	H113420527	43	3				EnteroBase quality control failed
9471_8#5	ERR278701	H09164014102	43	3			4	EnteroBase quality control failed
11893_2#55	ERR460148	06-4593	307	3
7688_1#89	ERR126109	H114340508	43	3			4
4502_3#8	ERR023403	H052720394v1	307	3		43
5886_7#4	ERR1276847	02-00729	307	3		43
5886_8#4	ERR1276854	LH_M1	307	3
7978_7#3	ERR160951	CAN0174	43	3
11893_2#45	ERR460138	02-495	43	4			3
11893_2#46	ERR460139	09-2013	43	4			3
9471_8#10	ERR278706		43	4
9471_8#16	ERR278712	H09270034402	43	4		307	3
9471_8#19	ERR278715	H09312062002	43	4		307	3
9471_8#2	ERR278698	H09114061101	307	4		2113		EnteroBase quality control failed
9471_8#20	ERR278716		43	4
9471_8#24	ERR278720	H09336046202	43	4		307	3
9471_8#25	ERR278721	H09336050502	307	4		2113		EnteroBase quality control failed
9471_8#26	ERR278722	H09336052608	307	4		2113		EnteroBase quality control failed
9471_8#35	ERR278731		43	4
9471_8#36	ERR278732		43	4
9471_8#4	ERR278700	H09150029701	1577	4				EnteroBase quality control failed
9471_8#8	ERR278704		43	4
5886_7#6	ERR1276849		43	4		307	3
SPB7	CP000886		1619	4		307	3
4502_3#4	ERR023399	H083320395	149	5
4502_3#5	ERR023400	H083280501	149	5
7712_6#21	ERR129872	26_PB-J	149	5
9471_8#17	ERR278713	H09292073902	149	5
9471_8#21	ERR278717	H09320044702	149	5
9471_8#22	ERR278718	H09330035602	149	5
9471_8#23	ERR278719	H09332059202	149	5
9471_8#29	ERR278725	H09374054007	149	5
9471_8#32	ERR278728	H09398056601	149	5
9471_8#33	ERR278729	H123040694	149	5
9471_8#6	ERR278702	H09180049402	149	5
7688_1#86	ERR126106	H103240168	149	5
7688_1#87	ERR126107	H102880256	149	5
7688_1#88	ERR126108	H103360364	149	5
7688_1#90	ERR126110	H103420604	149	5
7712_6#1	ERR129852	1_PB-J		5		149
7969_8#34	ERR161892	CAN0156		5		149
7969_8#45	ERR161903	CAN0168		5		149
11893_2#48	ERR460141	SARA57	42	6
11893_2#60	ERR460153	SARA60	734	6
11893_2#49	ERR460142	SARA58	42	6
11893_2#50	ERR460143	SARA59	42	6
11893_2#59	ERR460152	1856/76	733	6
9471_8#18	ERR278714	H09300048401	42	6				EnteroBase quality control failed
9471_8#30	ERR278726	H09390038502	423	6
9471_8#39	ERR278735	H121660299	423	6
9471_8#7	ERR278703	H09194030102	42	6
11893_2#47	ERR460140	5K	42	6
5886_6#6	ERR424910	Salm0060	423	6
5886_8#1	ERR1276851	SARA58_FB_1	42	6
5886_8#6	ERR1276856	SARB46_FB	42	6
114048_H	submitted	114048_H	679	7
53015	SRR3049388	53015	679	7
61892	SRR1965575	61892	679	7
65000	SRR1967894	65000	679	7
9471_8#3	ERR278699	H09142039301	88	8
9471_8#43	ERR278739	H120360339	88	8
9471_8#9	ERR278705	H09198014602	88	8
5886_7#3	ERS1063931	00-02650	88	8
5886_7#5	ERS1063932	04-01793	88	8
7712_6#28	ERR129879	33_PB-J	127	9
7712_6#35	ERR129886	40_PB-J	127	9
7712_6#7	ERR129858	8_PB-J	88	9
11893_2#37	ERR460131	SARA56	127	9
7712_6#11	ERR129862	13_PB-J	127	9
7712_6#13	ERR129864	16_PB-J	127	9
7712_6#15	ERR129866	19_PB-J	88	9
7712_6#17	ERR129868	21_PB-J	88	9
7712_6#18	ERR129869	23_PB-J	88	9
7712_6#2	ERR129853	2_PB-J	127	9
7712_6#22	ERR129873	27_PB-J	127	9
7712_6#24	ERR129875	29_PB-J	127	9
7712_6#25	ERR129876	30_PB-J	127	9
7712_6#26	ERR129877	31_PB-J	127	9
7712_6#27	ERR129878	32_PB-J	127	9
7712_6#29	ERR129880	34_PB-J	127	9
7712_6#3	ERR129854	3_PB-J	127	9
7712_6#30	ERR129881	35_PB-J	127	9
7712_6#31	ERR129882	36_PB-J	127	9
7712_6#32	ERR129883	37_PB-J	127	9
7712_6#33	ERR129884	38_PB-J	127	9
7712_6#34	ERR129885	39_PB-J	127	9
7712_6#36	ERR129887	41_PB-J	127	9
7712_6#37	ERR129888	42_PB-J	88	9
7712_6#5	ERR129856	5_PB-J	88	9
7712_6#8	ERR129859	9_PB-J	88	9
7712_6#9	ERR129860	10_PB-J	127	9
9471_8#14	ERR278710	H09260022901	88	9
9471_8#15	ERR278711	H09270034202	127	9
9471_8#28	ERR278724	H09362059002	127	9
7712_6#12	ERR129863	15_PB-J	127	9
7712_6#23	ERR129874	28_PB-J	127	9
7712_6#4	ERR129855	4_PB-J	127	9
11940_1#36	ERR467031	6332/88-1	127	9
5886_8#2	ERR1276852	MZ0531	88	9
5886_8#3	ERR1276853	LH_M301	127	9
11439_1#1	ERR403698	2010/02257	28	10
11439_1#2	ERR403699	2010/12407	Nd	10		28
11439_1#3	ERR403700	2010/14896	Nd	10		28
11439_1#4	ERR403701	2010/12222b	Nd	10		28
11439_1#5	ERR403702	2010/01627	Nd	10		28
11439_1#6	ERR403703	2010/13556	28	10
11439_1#7	ERR403704	2010/13583	28	10
11439_1#8	ERR403705	2010/02245	28	10
11439_1#90	ERR403706	2010/00939	Nd	10		28
11439_1#91	ERR403707	2010/01382	Nd	10		28
11439_1#92	ERR403708	2010/14600	28	10
11439_1#93	ERR403709	2010/10841	28	10
11893_2#42	ERR460136	01-0582	28	10
11940_1#39	ERR467034	02-9348	28	10
7712_6#10	ERR129861	11_PB-J	28	10
11439_1#94	ERR403710			10		28
11439_1#95	ERR403711	2009-2080	28	10
5886_5#9	ERR424902	Salm0052		*		28	10
7712_6#6	ERR129857	7_PB-J	19		Typhimurium
11893_2#54	ERR460147	02-3872	43		Monophasic Typhimurium	34
9471_8#1	ERR278697	H09092024402	829		Hull	1996		EnteroBase quality control failed
9471_8#31	ERR278727	H09392051202	1583		Abony
9471_8#37	ERR278733	H122200434	1484		Mygdal
