# Supplementary material for: Genomic perspective on the bacillus causing paratyphoid B fever
Source: Research Square preprint supplement (doi:10.21203/rs.3.rs-4502330/v1), 2024-06-18
Supplement: Supplementary file 9 [file f558e550b686119fc262cf14.xlsx]

## Sheet: Data 4
							Position in genomes
Gene	Non-unique Gene name	Annotation	#isolates	Panaroo_output order	CDS Assignment	Assignment details	B97	CIP 54.100	B2590	B2227	63-90	B1655	B1727	P7704	Isolate carrying the gene (short-read assembly)"
group_1248		hypothetical protein	30	442	Prophage	FljB_prophage		CP147906_1123287_1124300			CP147907_1123415_1124428
group_154		integrase	33	424	Prophage	FljB_prophage		CP147906_1124307_1125320			CP147907_1124435_1125448
group_401		Repressor protein CI	33	416	Prophage	FljB_prophage		CP147906_1125320_1125892			CP147907_1125448_1126020
group_382		Phage regulatory protein CII (CP76)	33	418	Prophage	FljB_prophage		CP147906_1126188_1126778			CP147907_1126316_1126906
group_1352		DUF2724 domain-containing protein;Bacteriophage 186 Fil	33	397	Prophage	FljB_prophage		CP147906_1126788_1127015			CP147907_1126916_1127143
group_600		hypothetical protein	33	410	Prophage	FljB_prophage		CP147906_1127431_1127832			CP147907_1127559_1127960
group_857		DUF2732 domain-containing protein	33	402	Prophage	FljB_prophage		CP147906_1127900_1128130			CP147907_1128028_1128258
group_219		adenine methylase	33	423	Prophage	FljB_prophage		CP147906_1128121_1128981			CP147907_1128249_1129109
group_18		replication endonuclease	33	432	Prophage	FljB_prophage		CP147906_1128978_1130999			CP147907_1129106_1131127
group_886		hypothetical protein	33	400	Prophage	FljB_prophage		CP147906_1131118_1131330			CP147907_1131246_1131458
group_776		transcriptional regulator	33	405	Prophage	FljB_prophage		CP147906_1131304_1131573			CP147907_1131432_1131701
group_1437		hypothetical protein;phage portal protein	33	396	Prophage	FljB_prophage		CP147906_1131624_1132685			CP147907_1131752_1132813
yjcR	yjcR	terminase	33	430	Prophage	FljB_prophage		CP147906_1132682_1134457			CP147907_1132810_1134585
group_243		phage capsid protein	33	422	Prophage	FljB_prophage		CP147906_1134618_1135418			CP147907_1134746_1135546
group_150		phage major capsid protein P2 family	33	425	Prophage	FljB_prophage		CP147906_1135480_1136502			CP147907_1135608_1136630
group_303		terminase	33	419	Prophage	FljB_prophage		CP147906_1136506_1137207			CP147907_1136634_1137335
group_473		head completion protein	33	412	Prophage	FljB_prophage		CP147906_1137253_1137756			CP147907_1137381_1137884
group_468		phage tail protein	33	413	Prophage	FljB_prophage		CP147906_1137753_1138259			CP147907_1137881_1138387
group_301		hypothetical protein	33	420	Prophage	FljB_prophage		CP147906_1138256_1138963			CP147907_1138384_1139091
group_120		DUF2586 domain-containing protein	33	427	Prophage	FljB_prophage		CP147906_1138960_1140087			CP147907_1139088_1140215
group_526		DUF2597 domain-containing protein	33	411	Prophage	FljB_prophage		CP147906_1140084_1140539			CP147907_1140212_1140667
group_736		holin	33	406	Prophage	FljB_prophage		CP147906_1140549_1140842			CP147907_1140677_1140970
group_673		D-alanyl-D-alanine carboxypeptidase	33	409	Prophage	FljB_prophage		CP147906_1140839_1141180			CP147907_1140967_1141308
group_684		hypothetical protein	33	408	Prophage	FljB_prophage		CP147906_1141180_1141512			CP147907_1141308_1141640
group_802		Phage tail assembly chaperone	33	404	Prophage	FljB_prophage		CP147906_1141659_1141916			CP147907_1141787_1142044
group_22		phage tail tape measure protein	33	431	Prophage	FljB_prophage		CP147906_1142104_1144074			CP147907_1142232_1144202
group_691		DUF2590 domain-containing protein	33	407	Prophage	FljB_prophage		CP147906_1144071_1144400			CP147907_1144199_1144528
group_106		Baseplate J-like protein	33	428	Prophage	FljB_prophage		CP147906_1144397_1145581			CP147907_1144525_1145709
group_386		phage tail protein	33	417	Prophage	FljB_prophage		CP147906_1145574_1146161			CP147907_1145702_1146289
group_1595		hypothetical protein;phage tail protein	33	394	Prophage	FljB_prophage		CP147906_1146171_1148414			CP147907_1146299_1148323
group_426		tail fiber assembly protein	33	414	Prophage	FljB_prophage		CP147906_1148427_1148972			CP147907_1148554_1149099
group_289		hypothetical protein	33	421	Prophage	FljB_prophage		CP147906_1148962_1149687			CP147907_1149089_1149814
group_425		Putative bacterial nucleoid DNA-binding protein	33	415	Prophage	FljB_prophage		CP147906_1149659_1150204			CP147907_1149786_1150331
group_33		Phage head completion protein (GPL)	33	429	Prophage	FljB_prophage		CP147906_1150204_1151907			CP147907_1150331_1152034
group_122		PIN-12 domain-containing protein	33	426	Prophage	FljB_prophage		CP147906_1152587_1153705			CP147907_1152714_1153832
group_1227		tyrosine-type recombinase/integrase;Phage integrase family protein	33	398	Prophage	FljB_prophage		CP147906_1154531_1155256			CP147907_1154658_1155383
group_826		hypothetical protein	33	403	Prophage	FljB_prophage		CP147906_1155330_1155572			CP147907_1155457_1155699
group_2292		KilA-N domain protein	10	573	none		CP147901_1652586_1652816	CP147906_1613832_1614062	CP147896_1618444_1618674	CP147897_1617743_1617973	CP147907_1619721_1619951	CP147895_1652416_1652646	CP147899_1579633_1579863
group_1481		DUF968 domain-containing protein;hypothetical protein;HNHc domain-containing protein	406	186	Prophage	FljB_prophage	CP147901_1166148_1167137	CP147906_1614070_1614876	CP147896_1136021_1137010	CP147897_1135979_1136968	CP147907_1619959_1620948	CP147895_1135969_1136958	CP147899_1579871_1580860
group_2287		HNHc domain-containing protein	10	576	Prophage	FljB_prophage		CP147906_1614070_1614876	CP147896_1136021_1137010	CP147897_1135979_1136968	CP147907_1619959_1620948	CP147895_1135969_1136958	CP147899_1579871_1580860
group_2293		Antitermination protein Q	25	486	Prophage			CP147906_1615076_1615441			CP147907_1620966_1621331		CP147899_1580878_1581243
group_2294		putative P-loop ATPase KAP-like	21	501	Prophage			CP147906_1615470_1616801			CP147907_1621360_1622691		CP147899_1581272_1582603
group_2295		phage holin lambda family	21	500	Prophage			CP147906_1617098_1617427			CP147907_1622988_1623317		CP147899_1582900_1583229
group_2296		HK97 family phage prohead protease	21	499	Prophage			CP147906_1617441_1617959			CP147907_1623331_1623849		CP147899_1583243_1583761
group_2297		Phage tail protein	20	505	Prophage			CP147906_1618020_1619261			CP147907_1623910_1625151		CP147899_1583822_1585063
group_2298		Tail fiber assembly protein	20	504	Prophage			CP147906_1619264_1619791			CP147907_1625154_1625681		CP147899_1585066_1585593
group_2299		Tail fiber assembly protein	20	503	Prophage			CP147906_1620169_1620612			CP147907_1626059_1626502		CP147899_1585971_1586414
group_2300	oafA	Peptidoglycan/LPS O-acetylase OafA/YrhL contains acyltransferase and SGNH-hydrolase domains	21	498	Prophage			CP147906_1620666_1622495			CP147907_1626556_1628385		CP147899_1586468_1588297
group_2301		Peptidase-S24 domain-containing protein	24	496	Prophage			CP147906_1623002_1623673			CP147907_1628919_1629590		CP147899_1588822_1589493
group_2302	yejM	LPS biosynthesis-modulating metalloenzyme YejM	24	495	none			CP147906_1623954_1625714			CP147907_1629871_1631631		CP147899_1589774_1591534
group_2303	yejL	UPF0352 protein YejL	24	494	none			CP147906_1625746_1625973			CP147907_1631663_1631890		CP147899_1591566_1591793
group_2304	yejK	nucleoid-associated protein YejK	24	493	none			CP147906_1626153_1627160			CP147907_1632070_1633077		CP147899_1591973_1592980
group_2305		Inner membrane protein	24	492	none			CP147906_1627188_1627808			CP147907_1633105_1633725		CP147899_1593008_1593628
group_2306	rplY	50S ribosomal protein L25	25	485	none			CP147906_1627917_1628201			CP147907_1633834_1634118		CP147899_1593737_1594021
group_2307	radD	Putative DNA repair helicase RadD	25	484	none			CP147906_1628326_1630086			CP147907_1634243_1636003		CP147899_1594146_1595906
group_2218	rsuA	16S rRNA pseudouridine(516) synthase RsuA	25	488	none			CP147906_1630238_1630933			CP147907_1636155_1636850		CP147899_1596058_1596753
group_2219	bcr	Bcr/CflA family multidrug efflux MFS transporter	25	487	none			CP147906_1630961_1632151			CP147907_1636878_1638068		CP147899_1596781_1597971
group_2220		YejG-like protein	26	481	none			CP147906_1632542_1632886			CP147907_1638459_1638803		CP147899_1598362_1598706
group_2221	yejF	microcin C ABC transporter ATP-binding protein YejF	26	480	none			CP147906_1632890_1634479			CP147907_1638807_1640396		CP147899_1598710_1600299
group_2222	yejE	ABC-type microcin C transport system permease component YejE	26	479	none			CP147906_1634481_1635506			CP147907_1640398_1641423		CP147899_1600301_1601326
group_2223	yejB	Inner membrane ABC transporter permease protein YejB	26	478	none			CP147906_1635506_1636600			CP147907_1641423_1642517		CP147899_1601326_1602420
group_2224	oppA	ABC-type oligopeptide transport system periplasmic component	26	477	none			CP147906_1636610_1638415			CP147907_1642527_1644332		CP147899_1602430_1604235
group_2225	eAL	cyclic di-GMP phosphodiesterase	26	476	none			CP147906_1638522_1640078			CP147907_1644439_1645995		CP147899_1604342_1605898
group_2226	mepS	bifunctional murein DD-endopeptidase/murein LD-carboxypeptidase	26	475	none			CP147906_1640404_1640976			CP147907_1646321_1646893		CP147899_1606224_1606796
group_2227		Lipid A 1-diphosphate synthase	26	474	none			CP147906_1641390_1642109			CP147907_1647307_1648026		CP147899_1607210_1607929
group_2228		GTP-binding protein	26	473	none			CP147906_1642139_1643125			CP147907_1648056_1649042		CP147899_1607959_1608945
group_2229	yeiP	elongation factor P-like protein YeiP	26	472	none			CP147906_1643338_1643910			CP147907_1649255_1649827		CP147899_1609158_1609730
group_2230	ykgJ	YkgJ family cysteine cluster protein	26	471	none			CP147906_1644234_1644488			CP147907_1650151_1650405		CP147899_1610054_1610308
group_2231		GNVR domain-containing protein	27	459	none			CP147906_1645027_1645692			CP147907_1650944_1651609		CP147899_1610847_1611512
group_2232	setB	sugar efflux transporter SetB	27	458	none			CP147906_1645757_1646938			CP147907_1652553_1652855		CP147899_1611577_1612758
group_2233		Secreted protein	27	457	none			CP147906_1647132_1647239					CP147899_1612952_1613059
group_2234	fruB	fused PTS fructose transporter subunit IIA/HPr protein	27	456	none			CP147906_1647307_1648437			CP147907_1653158_1654288		CP147899_1613127_1614257
group_2235	fruK	1-phosphofructokinase	27	455	none			CP147906_1648437_1649375			CP147907_1654288_1655226		CP147899_1614257_1615195
group_2236	fruA	PTS fructose transporter subunit IIBC	27	454	none			CP147906_1649392_1651080			CP147907_1655243_1656931		CP147899_1615212_1616900
group_2237	nfo	deoxyribonuclease IV	27	453	none			CP147906_1651145_1652002			CP147907_1656996_1657853		CP147899_1616965_1617822
group_2238	yeiH	UPF0324 inner membrane protein YeiH	27	452	none			CP147906_1652081_1653130			CP147907_1657932_1658981		CP147899_1617901_1618950
yeiE	yeiE	DNA-binding transcriptional regulator YeiE	26	470	none			CP147906_1653251_1654114			CP147907_1659102_1659965		CP147899_1619071_1619934
group_2239	lysP	lysine-specific permease	26	469	none			CP147906_1654304_1655773			CP147907_1660155_1661624		CP147899_1620124_1621593
group_2240	cirA	catecholate siderophore receptor CirA	26	468	none			CP147906_1656119_1658110			CP147907_1661969_1663960		CP147899_1621939_1623930
group_2241	uhpC	Sugar phosphate permease	26	467	none			CP147906_1658154_1659476			CP147907_1664004_1665326		CP147899_1623974_1625296
group_2242	serB	phosphoserine phosphatase SerB	26	466	none			CP147906_1659509_1660396			CP147907_1665359_1666246		CP147899_1625329_1626216
group_2243	sdaA	L-serine ammonia-lyase	26	465	none			CP147906_1660613_1661980			CP147907_1666463_1667830		CP147899_1626433_1627800
group_2244		Helix-turn-helix domain-containing protein	26	464	none			CP147906_1661985_1662374			CP147907_1667835_1668224		CP147899_1627805_1628194
group_2245	fghA	S-formylglutathione hydrolase	26	463	none			CP147906_1662363_1663220			CP147907_1668213_1669070		CP147899_1628183_1629040
group_2246	folE	GTP cyclohydrolase I FolE	26	462	none			CP147906_1663550_1664218			CP147907_1669400_1670068		CP147899_1629370_1630038
group_2247	yeiB	putative membrane protein YeiB	26	461	none			CP147906_1664215_1665375			CP147907_1670065_1671225		CP147899_1630035_1631195
group_2248	galS	HTH-type transcriptional regulator GalS	26	460	none			CP147906_1665525_1666547			CP147907_1671375_1672397		CP147899_1631345_1632367
group_2285	opuBB	osmoprotectant uptake system permease	4	694	none		CP147901_1735434_1736165	CP147906_1696710_1697441	CP147896_1701292_1702023	CP147897_1700591_1701322	CP147907_1702529_1703260	CP147895_1735254_1735985	CP147899_1662499_1663230
rfbJ	rfbJ	hypothetical protein;CDP-abequose synthase;NAD-dependent epimerase/dehydratase family protein	528	26	none		CP147901_1822472_1823371	CP147906_1783317_1784216	CP147896_1788339_1789226	CP147897_1787638_1788525	CP147907_1789576_1790475	CP147895_1822301_1823200	CP147899_1749546_1750445
rfbX	rfbX	hypothetical protein;MATE family efflux transporter;Putative O-antigen transporter	385	187	none		CP147901_1824050_1824712	CP147906_1784685_1785590	CP147896_1789916_1790578	CP147897_1789217_1789879	CP147907_1790944_1791849	CP147895_1823879_1824541	CP147899_1751033_1751818
rfbV	rfbV	Abequosyltransferase RfbV;abequosyltransferase RfbV	367	189	none		CP147901_1824746_1825345	CP147906_1785595_1786596	CP147896_1790612_1791211	CP147897_1789913_1790512	CP147907_1791854_1792855	CP147895_1824575_1825174	CP147899_1751823_1752422
rfbU	rfbU	Glycosyltransferase family 4 protein;Glycosyltransferase;glycosyltransferase;Protein RfbU	461	127	none			CP147906_1786917_1787978	CP147896_1791932_1792993	CP147897_1791233_1792294	CP147907_1793176_1794237		CP147899_1753143_1753706
group_107		integrase	3	927	Prophage			CP147906_1810131_1811312
group_900		AlpA family transcriptional regulator	3	876	Prophage			CP147906_1811293_1811499
group_829		DUF4060 domain-containing protein	98	312	Prophage	SopE_noSopE_prophage		CP147906_1811676_1811918	CP147896_2853601_2853843	CP147897_3915712_3915954	CP147907_2896516_2896758
group_1724		DNA methylase	98	311	Prophage	SopE_noSopE_prophage		CP147906_1811921_1812790	CP147896_2852702_2853598	CP147897_3915957_3916853	CP147907_2895617_2896513
group_324		exonuclease	3	913	Prophage			CP147906_1812787_1813467
bet	bet	phage recombination protein Bet;Bacteriophage recombination protein;hypothetical protein	100	295	Prophage	SopE_noSopE_prophage		CP147906_1813464_1814249	CP147896_2851342_2852085	CP147897_3917470_3918213	CP147907_2894257_2895000
group_1781		Gam;host-nuclease inhibitor protein Gam	100	296	Prophage	SopE_noSopE_prophage		CP147906_1814255_1814551	CP147896_2851040_2851336	CP147897_3918219_3918515	CP147907_2893955_2894251
group_907		Cell division protein FtsZ	68	342	Prophage	SopE_noSopE_prophage		CP147906_1814642_1814842	CP147896_2850749_2850949		CP147907_2893664_2893864
group_123		AAA-31 domain-containing protein	2	1089	Prophage			CP147906_1815213_1816322
group_585		transcriptional regulator	2	1076	Prophage			CP147906_1816465_1816878
ydaS	ydaS	Rha family transcriptional regulator	2	1072	Prophage			CP147906_1816952_1817188
group_1107		Regulatory protein CII	535	4	Prophage	SopE_noSopE_prophage	CP147901_3959205_3959525	CP147906_1817208_1817528	CP147896_2847405_2847725	CP147897_3921738_3922058	CP147907_2890320_2890640	CP147895_3982659_3982979	CP147899_3928355_3928675
group_1108		Regulatory protein CII	35	384	Prophage	SopE_noSopE_prophage	CP147901_3959205_3959525	CP147906_1817208_1817528	CP147896_2847405_2847725	CP147897_3921738_3922058	CP147907_2890320_2890640	CP147895_3982659_3982979	CP147899_3928355_3928675
group_1688		replication protein	6	635	Prophage	SopE_noSopE_prophage		CP147906_1817620_1818456			CP147907_2889392_2890228
group_308		phage replication protein	6	637	Prophage	SopE_noSopE_prophage		CP147906_1818453_1819148			CP147907_2888700_2889395
group_447		Eaa1	2	1080	Prophage			CP147906_1819162_1819695
group_1009		Orf45 protein	2	1068	Prophage			CP147906_1819692_1819808
group_479		Ead/Ea22-like protein	2	1079	Prophage			CP147906_1819805_1820305
group_1695		DUF550 domain-containing protein	3	855	Prophage			CP147906_1820302_1821216
group_352		Nmad5 domain-containing protein	3	911	Prophage			CP147906_1821368_1822000
group_780		hypothetical protein	38	379	Prophage	SopE_noSopE_prophage		CP147906_1822067_1822333		CP147897_3926204_3926470	CP147907_2886222_2886488
dinI	dinI	Gifsy-1 prophage DinI	3	861	Prophage			CP147906_1822489_1822722
ninG	ninG	Recombination protein NinG	4	749	Prophage	SopE_prophage		CP147906_1823933_1824544	CP147896_4015663_4015902
group_1742		Bacteriophage Lambda NinG protein;YlcG family protein;antiterminator	101	287	Prophage	SopE_noSopE_prophage		CP147906_1824541_1824681	CP147896_4015899_4016018	CP147897_3929880_3929999	CP147907_2883874_2884014
group_1743		antiterminator	101	286	Prophage	SopE_noSopE_prophage		CP147906_1824678_1825367	CP147896_4016036_4016716	CP147897_3930017_3930697	CP147907_2883197_2883877
group_1114		phage holin lambda family	527	34	Prophage	SopE_noSopE_prophage	CP147901_3968047_3968394	CP147906_1825562_1825909	CP147896_2838537_2838884			CP147895_3991501_3991848	CP147899_3937197_3937544
group_1808		endolysin	4	744	Prophage			CP147906_1825912_1826526			CP147907_1915648_1916262
group_1867		Rz1 lytic protein;Peptidase	4	741	Prophage			CP147906_1826734_1827078			CP147907_1916470_1916814
group_418		hypothetical protein	3	904	Prophage			CP147906_1827156_1827710			CP147907_1916892_1917446
group_1846		endonuclease;HNHc domain-containing protein	503	99	Prophage	FljB_no-FljB_prophage	CP147901_1162084_1162434	CP147906_1827761_1828111	CP147896_1140724_1141074	CP147897_1140682_1141032	CP147907_1917497_1917847	CP147895_1140672_1141022
group_1707		endonuclease	4	747	Prophage	FljB_no-FljB_prophage	CP147901_1162084_1162434	CP147906_1827761_1828111	CP147896_1140724_1141074	CP147897_1140682_1141032	CP147907_1917497_1917847	CP147895_1140672_1141022
group_1415		P27 family phage terminase small subunit;phage terminase small subunit P27 family;Terminase	503	107	Prophage	FljB_no-FljB_prophage	CP147901_1161463_1161957	CP147906_1828237_1828731	CP147896_1141201_1141695	CP147897_1141159_1141653	CP147907_1917973_1918467	CP147895_1141149_1141643
group_487		phage terminase small subunit P27 family	4	752	Prophage	FljB_no-FljB_prophage	CP147901_1161463_1161957	CP147906_1828237_1828731	CP147896_1141201_1141695	CP147897_1141159_1141653	CP147907_1917973_1918467	CP147895_1141149_1141643
ymfN	ymfN	Phage terminase-like protein large subunit contains N-terminal HTH domain;Putative terminase large subunit	502	113	Prophage	FljB_no-FljB_prophage	CP147901_1159733_1161466	CP147906_1828728_1828868	CP147896_1141692_1143425	CP147897_1141650_1143383		CP147895_1141640_1143373
group_407		Phage protein	505	86	Prophage	FljB_no-FljB_prophage	CP147901_1154431_1154991	CP147906_1835199_1835759	CP147896_1148167_1148727	CP147897_1148125_1148685	CP147907_1924939_1925499	CP147895_1148115_1148675
group_71		phage major capsid protein	504	98	Prophage	FljB_no-FljB_prophage	CP147901_1148222_1149562	CP147906_1840139_1841479	CP147896_1153596_1154936	CP147897_1153554_1154894	CP147907_1929879_1931219	CP147895_1153544_1154884
group_1363		hypothetical protein;Baseplate protein	504	90	Prophage	FljB_no-FljB_prophage	CP147901_1147167_1148225	CP147906_1841476_1842540	CP147896_1154933_1155991	CP147897_1154891_1155949	CP147907_1931216_1932274	CP147895_1154881_1155939
group_914		PHB domain-containing protein	502	117	Prophage	FljB_no-FljB_prophage	CP147901_1146029_1146223	CP147906_1844032_1844553	CP147896_1156935_1157129	CP147897_1156893_1157087		CP147895_1156883_1157077
group_1762		phage tail protein	3	853	Prophage			CP147906_1845243_1846694			CP147907_1934874_1936436
group_1821		phage tail protein;Tail fiber assembly protein	3	852	Prophage			CP147906_1846672_1847247			CP147907_1936436_1937011
group_958		hypothetical protein	3	871	Prophage			CP147906_1847237_1847410
group_119		acyltransferase	3	926	Prophage			CP147906_1847486_1848619
group_1225		phage tail protein;DUF1353 domain-containing protein	3	859	Prophage			CP147906_1848839_1849045
group_989		Phage tail assembly protein	3	865	Prophage			CP147906_1849020_1849163
group_290		hypothetical protein	3	916	Prophage			CP147906_1849231_1849953
group_926		DUF2767 domain-containing protein	3	873	Prophage			CP147906_1850062_1850253
group_781		hypothetical protein	3	883	Prophage			CP147906_1850269_1850535
group_1277	ridA	RidA family protein;RutC family protein YjgH	32	434	none			CP147906_2390753_2391142
group_1568	queA	S-adenosylmethionine:tRNA-ribosyltransferase-isomerase (queuine synthetase)	33	395	none			CP147906_2391194_2392057
yxeI	yxeI	linear amide C-N hydrolase	35	383	none			CP147906_2392103_2393158			CP147907_2394155_2395123
group_515		hypothetical protein	35	389	none			CP147906_2393590_2394054			CP147907_2395555_2396019
group_215		LysR family transcriptional regulator	35	392	none			CP147906_2394099_2394971			CP147907_2396064_2396936
marA	marA	MDR efflux pump AcrAB transcriptional activator MarA	35	388	none			CP147906_2397702_2398085			CP147907_2399667_2400050
marB	marB	multiple antibiotic resistance protein MarB	35	385	none			CP147906_2398120_2398329			CP147907_2400085_2400294
eamA	eamA	O-acetylserine/cysteine exporter	35	393	none			CP147906_2398448_2399350			CP147907_2400413_2401315
ydfG	ydfG	bifunctional NADP-dependent 3-hydroxy acid dehydrogenase/3-hydroxypropionate dehydrogenase YdfG	515	58	none		CP147901_2398588_2399334	CP147906_2405394_2406140	CP147896_2364279_2365025	CP147897_2363405_2364151	CP147907_2407595_2408341	CP147895_2380605_2381351	CP147899_2326368_2327114
group_315	gntR	DNA-binding transcriptional regulator GntR family	514	59	none		CP147901_2399464_2400150	CP147906_2406270_2406956	CP147896_2365155_2365841	CP147897_2364281_2364967	CP147907_2408471_2409157	CP147895_2381481_2382167	CP147899_2327244_2327930
ydfZ	ydfZ	selenoprotein YdfZ	497	123	none		CP147901_2400331_2400534	CP147906_2407137_2407340	CP147896_2366021_2366224	CP147897_2365148_2365351	CP147907_2409338_2409541	CP147895_2382348_2382551	CP147899_2328111_2328314
group_1649	mtlD	D-mannonate oxidoreductase;Mannitol dehydrogenase family protein	512	61	none		CP147901_2400601_2402067	CP147906_2407407_2408405	CP147896_2366291_2367757	CP147897_2365418_2366884	CP147907_2409608_2411074	CP147895_2382618_2384084	CP147899_2328381_2329847
uhpC	uhpC	Sugar phosphate permease	510	69	none		CP147901_2402211_2403590	CP147906_2408549_2409928	CP147896_2367901_2369280	CP147897_2367028_2368407	CP147907_2411218_2412597	CP147895_2384228_2385607	CP147899_2329991_2331370
group_1207	tdh	Dehydrogenase;Zn-dependent oxidoreductase	512	63	none		CP147901_2403644_2404663	CP147906_2409982_2411001	CP147896_2369334_2370353	CP147897_2368461_2369480	CP147907_2412651_2413670	CP147895_2385661_2386680	CP147899_2331424_2332443
group_1542	rspA	L-alanine-DL-glutamate epimerase or related enzyme of enolase superfamily;Starvation-sensing protein rspA;D-galactonate dehydratase family protein;starvation-sensing protein RspA	512	62	none		CP147901_2404674_2405888	CP147906_2411012_2412226	CP147896_2370364_2371578	CP147897_2369491_2370705	CP147907_2413681_2414895	CP147895_2386691_2387905	CP147899_2332454_2333668
ynfA	ynfA	YnfA family protein	511	66	none		CP147901_2406010_2406345	CP147906_2412348_2412683	CP147896_2371700_2372035	CP147897_2370827_2371162	CP147907_2415017_2415352	CP147895_2388027_2388362	CP147899_2333790_2334125
ynfB	ynfB	DUF1283 domain-containing protein	511	67	none		CP147901_2406488_2406829	CP147906_2412826_2413167	CP147896_2372178_2372519	CP147897_2371305_2371646	CP147907_2415495_2415836	CP147895_2388505_2388846	CP147899_2334268_2334609
speG	speG	spermidine N1-acetyltransferase	511	68	none		CP147901_2406865_2407425	CP147906_2413203_2413763	CP147896_2372555_2373115	CP147897_2371682_2372242	CP147907_2415872_2416432	CP147895_2388882_2389442	CP147899_2334645_2335205
ynfC	ynfC	YnfC family lipoprotein	511	65	none		CP147901_2407466_2408143	CP147906_2413804_2414481	CP147896_2373156_2373833	CP147897_2372283_2372960	CP147907_2416473_2417150	CP147895_2389483_2390160	CP147899_2335246_2335923
group_1126		DUF1161 domain-containing protein;Outer membrane protein	512	64	none		CP147901_2408283_2408588	CP147906_2414621_2414926	CP147896_2373973_2374278	CP147897_2373100_2373405	CP147907_2417290_2417595	CP147895_2390300_2390605	CP147899_2336063_2336368
group_1744	bisC	Anaerobic selenocysteine-containing dehydrogenase;Anaerobic dimethyl sulfoxide reductase chain A;molybdopterin-dependent oxidoreductase;Anaerobic dimethyl sulfoxide reductase subunit A;Dimethyl sulfoxide reductase subunit A1	512	60	none		CP147901_2408745_2411183	CP147906_2415083_2417521	CP147896_2374435_2376873	CP147897_2373562_2376000	CP147907_2417752_2420190	CP147895_2390762_2393200	CP147899_2336525_2338963
group_1818	bisC	molybdopterin-dependent oxidoreductase;dimethyl sulfoxide reductase subunit A;Dimethyl sulfoxide reductase subunit	492	124	none		CP147901_2411282_2413717	CP147906_2417620_2420055	CP147896_2376972_2379407		CP147907_2420316_2422724	CP147895_2393299_2395734	CP147899_2339062_2341497
group_1278	dmsB	(4Fe-4S)-binding protein;dimethylsulfoxide reductase subunit B	507	70	none		CP147901_2413728_2414345	CP147906_2420066_2420683	CP147896_2379418_2380035	CP147897_2376011_2376628	CP147907_2422735_2423352	CP147895_2395745_2396362	CP147899_2341508_2342125
group_1757	spiC	hypothetical protein;Secretion system apparatus protein SsaB;SPI-2 type III secretion system protein SpiC	532	8	none		CP147901_2508315_2508698	CP147906_2514642_2515025	CP147896_2474004_2474387	CP147897_2470597_2470980	CP147907_2517323_2517706	CP147895_2490330_2490713	CP147899_2436094_2436477
lpp2	lpp2	Major outer membrane lipoprotein Lpp 2;hypothetical protein	534	5	none		CP147901_2529355_2529660	CP147906_2535682_2535987	CP147896_2495044_2495349	CP147897_2491637_2491942	CP147907_2538363_2538668	CP147895_2511370_2511675	CP147899_2457134_2457439
group_1300		hypothetical protein;RDD family protein	529	25	none		CP147901_2661167_2661394	CP147906_2667490_2667717	CP147896_2626848_2627075	CP147897_2623439_2623666	CP147907_2670169_2670396	CP147895_2643173_2643400	CP147899_2588941_2589168
group_2168		hypothetical protein	1	1139	none		CP147901_2742012_2742257	CP147906_2748337_2748582	CP147896_2707693_2707938	CP147897_2704283_2704528	CP147907_2750932_2751177	CP147895_2724017_2724262	CP147899_2669786_2670031
group_272		translation initiation factor IF-2	100	298	Prophage	SopE_prophage		CP147906_2859713_2860468	CP147896_4035518_4036273		CP147907_2862319_2863074
group_1706		hypothetical protein	102	284	Prophage	SopE_prophage		CP147906_2860528_2860701	CP147896_4035285_4035458
group_451		hypothetical protein	101	292	Prophage	SopE_prophage		CP147906_2860704_2861234	CP147896_4034752_4035282
group_661		hypothetical protein	102	285	Prophage	SopE_prophage		CP147906_2861241_2861588	CP147896_4034398_4034745
group_131		hypothetical protein	101	294	Prophage	SopE_prophage		CP147906_2861585_2862658	CP147896_4033328_4034401
group_726		hypothetical protein	101	291	Prophage	SopE_prophage		CP147906_2862661_2862963	CP147896_4033023_4033325
group_396		Putative bacteriophage protein	101	293	Prophage	SopE_prophage		CP147906_2862963_2863538	CP147896_4032448_4033023
group_1356		lytic transglycosylase;lytic transglycosylase domain-containing protein	101	289	Prophage	SopE_prophage		CP147906_2863538_2865547	CP147896_4030439_4032448
group_1220		hypothetical protein;Bacteriophage protein	527	33	Prophage	SopE_prophage	CP147901_3978383_3978928	CP147906_2867782_2868327	CP147896_2828003_2828548			CP147895_4001837_4002382	CP147899_3947533_3948078
group_627		Head-tail adaptor	527	38	Prophage	SopE_prophage	CP147901_3978008_3978379	CP147906_2868331_2868702	CP147896_2828552_2828923			CP147895_4001462_4001833	CP147899_3947158_3947529
group_467		Bacteriophage protein	527	41	Prophage	SopE_prophage	CP147901_3977502_3978008	CP147906_2868702_2869208	CP147896_2828923_2829429			CP147895_4000956_4001462	CP147899_3946652_3947158
group_579		DUF4054 domain-containing protein	527	39	Prophage	SopE_prophage	CP147901_3977086_3977502	CP147906_2869208_2869624	CP147896_2829429_2829845			CP147895_4000540_4000956	CP147899_3946236_3946652
group_1716		hypothetical protein;DUF1090 domain-containing protein	527	29	Prophage	SopE_prophage	CP147901_3976836_3977117	CP147906_2869593_2869874	CP147896_2829814_2830095			CP147895_4000290_4000571	CP147899_3945986_3946267
group_1434		Bacteriophage protein;DUF2184 domain-containing protein;hypothetical protein	528	27	Prophage	SopE_prophage	CP147901_3975852_3976793	CP147906_2869917_2870858	CP147896_2830138_2830485			CP147895_3999306_4000247	CP147899_3945002_3945943
group_486		Bacteriophage protein	527	40	Prophage	SopE_prophage	CP147901_3975343_3975837	CP147906_2870873_2871367	CP147896_2831094_2831588			CP147895_3998797_3999291	CP147899_3944493_3944987
group_101		DUF2213 domain-containing protein	527	45	Prophage	SopE_prophage	CP147901_3974141_3975340	CP147906_2871370_2872569	CP147896_2831591_2832790			CP147895_3997595_3998794	CP147899_3943291_3944490
group_345		Phage-Mu-F domain-containing protein	527	43	Prophage	SopE_prophage	CP147901_3973448_3974089	CP147906_2872621_2873262	CP147896_2832842_2833483			CP147895_3996902_3997543	CP147899_3942598_3943239
group_1577		hypothetical protein;DUF1073 domain-containing protein	527	30	Prophage	SopE_prophage	CP147901_3972037_3973488	CP147906_2873222_2874673	CP147896_2833443_2834894			CP147895_3995491_3996942	CP147899_3941187_3942638
group_1308		PBSX family phage terminase large subunit;hypothetical protein	528	28	Prophage	SopE_prophage	CP147901_3970637_3972037	CP147906_2874673_2876073	CP147896_2834894_2836294			CP147895_3994091_3995491	CP147899_3939787_3941187
group_271		Bacteriophage protein	527	44	Prophage	SopE_prophage	CP147901_3969916_3970671	CP147906_2876039_2876794	CP147896_2836260_2837015			CP147895_3993370_3994125	CP147899_3939066_3939821
group_880		Methyl-accepting chemotaxis protein	527	37	Prophage	SopE_prophage	CP147901_3969597_3969815	CP147906_2876895_2877113	CP147896_2837116_2837334			CP147895_3993051_3993269	CP147899_3938747_3938965
group_1453		Rz1 lytic protein	527	32	Prophage	SopE_prophage	CP147901_3969201_3969518	CP147906_2877192_2877509	CP147896_2837413_2837730			CP147895_3992655_3992972	CP147899_3938351_3938668
group_366		Glycoside hydrolase family 19 protein	527	42	Prophage	SopE_prophage	CP147901_3968397_3969014	CP147906_2877696_2878313	CP147896_2837917_2838534			CP147895_3991851_3992468	CP147899_3937547_3938164
group_1493		antitermination protein;Antitermination protein Q	527	31	Prophage	SopE_prophage	CP147901_3966851_3967648	CP147906_2879062_2879859	CP147896_2839283_2840080			CP147895_3990305_3991102	CP147899_3936001_3936798
group_1112		Phage protein	527	35	Prophage	SopE_prophage	CP147901_3965898_3966104	CP147906_2880606_2880812	CP147896_2840827_2841033	CP147897_3929063_3929269	CP147907_2884625_2884831	CP147895_3989352_3989558	CP147899_3935048_3935254
group_1113		Phage protein	38	377	Prophage	SopE_prophage	CP147901_3965898_3966104	CP147906_2880606_2880812	CP147896_2840827_2841033	CP147897_3929063_3929269	CP147907_2884625_2884831	CP147895_3989352_3989558	CP147899_3935048_3935254
group_1110		DUF1367 domain-containing protein	527	36	Prophage	SopE_prophage	CP147901_3965296_3965898	CP147906_2880812_2881414	CP147896_2841033_2841635	CP147897_3928461_3929063	CP147907_2884831_2885433	CP147895_3988750_3989352	CP147899_3934446_3935048
group_1111		DUF1367 domain-containing protein	38	378	Prophage	SopE_prophage	CP147901_3965296_3965898	CP147906_2880812_2881414	CP147896_2841033_2841635	CP147897_3928461_3929063	CP147907_2884831_2885433	CP147895_3988750_3989352	CP147899_3934446_3935048
group_1109	dinI	Gifsy-1 prophage DinI	526	46	Prophage	SopE_prophage	CP147901_3964647_3964880	CP147906_2881830_2882063	CP147896_2842051_2842284			CP147895_3988101_3988334	CP147899_3933797_3934030
group_792		Lipocalin-like domain-containing protein	532	17	Prophage	SopE_prophage	CP147901_3964246_3964506	CP147906_2882204_2882464	CP147896_2842425_2842685			CP147895_3987700_3987960	CP147899_3933396_3933656
group_801		DNA polymerase III subunit theta	532	16	Prophage	SopE_prophage	CP147901_3963989_3964246	CP147906_2882464_2882721	CP147896_2842685_2842942			CP147895_3987443_3987700	CP147899_3933139_3933396
group_1259		hypothetical protein;Phage protein	532	14	Prophage	SopE_prophage	CP147901_3963663_3963989	CP147906_2882721_2883047	CP147896_4014726_4015100			CP147895_3987117_3987443	CP147899_3932813_3933139
group_1562		DUF551 domain-containing protein	532	11	Prophage	SopE_prophage	CP147901_3962623_3963567	CP147906_2883143_2884087	CP147896_2843363_2844307			CP147895_3986077_3987021	CP147899_3931773_3932717
group_1393		hypothetical protein;Putative methyltransferase;Class I SAM-dependent methyltransferase	532	13	Prophage	SopE_prophage	CP147901_3962146_3962619	CP147906_2884091_2884564	CP147896_2844311_2844784			CP147895_3985600_3986073	CP147899_3931296_3931769
group_540		Ead/Ea22-like family protein	532	20	Prophage	SopE_prophage	CP147901_3961700_3962146	CP147906_2884564_2885010	CP147896_2844784_2845230			CP147895_3985154_3985600	CP147899_3930850_3931296
group_659		Putative DNA-binding protein	532	19	Prophage	SopE_prophage	CP147901_3961356_3961703	CP147906_2885007_2885354	CP147896_2845227_2845574			CP147895_3984810_3985157	CP147899_3930506_3930853
group_1602	dnaC	IstB-IS21 domain-containing protein;Putative replication protein;DNA replication protein DnaC	532	10	Prophage	SopE_prophage	CP147901_3960596_3961345	CP147906_2885365_2886114	CP147896_2845585_2846334			CP147895_3984050_3984799	CP147899_3929746_3930495
group_1741		Phage replication protein O N-terminal domain;Bacteriophage replication protein O;Phage-rep-O domain-containing protein;Regulatory protein	532	9	Prophage	SopE_prophage	CP147901_3959616_3960593	CP147906_2886117_2887094	CP147896_2846337_2847314			CP147895_3983070_3984047	CP147899_3928766_3929743
group_835		Helix-turn-helix domain-containing protein	531	22	Prophage	SopE_prophage	CP147901_3958946_3959185	CP147906_2887525_2887764	CP147896_4010058_4010297			CP147895_3982400_3982639	CP147899_3928096_3928335
group_1467		Regulatory protein;transcriptional regulator	532	12	Prophage	SopE_prophage	CP147901_3958416_3958826	CP147906_2887884_2888294	CP147896_4009528_4009938			CP147895_3981870_3982280	CP147899_3927566_3927976
group_977		MYM-type domain-containing protein	532	15	Prophage	SopE_prophage	CP147901_3957955_3958113	CP147906_2888597_2888755	CP147896_4009067_4009225			CP147895_3981409_3981567	CP147899_3927105_3927263
group_746		DNA breaking-rejoining protein	532	18	Prophage	SopE_prophage	CP147901_3957583_3957870	CP147906_2888840_2889127	CP147896_4008695_4008982			CP147895_3981037_3981324	CP147899_3926733_3927020
group_4		Exodeoxyribonuclease	531	24	Prophage	SopE_prophage	CP147901_3954529_3957456	CP147906_2889254_2892181	CP147896_4005641_4008568			CP147895_3977983_3980910	CP147899_3923679_3926606
group_1449		DNA breaking-rejoining protein;Exodeoxyribonuclease VIII;Gifsy-2 prophage RecT;Enterohemolysin	531	21	Prophage	SopE_prophage	CP147901_3953409_3954518	CP147906_2892192_2893301	CP147896_4004521_4005630			CP147895_3976863_3977972	CP147899_3922559_3923668
group_834		DUF4060 domain-containing protein	531	23	Prophage	SopE_prophage	CP147901_3953127_3953366	CP147906_2893344_2893583	CP147896_4004239_4004478			CP147895_3976581_3976820	CP147899_3922277_3922516
group_1387		hypothetical protein;diaminopropionate ammonia-lyase	539	2	none		CP147901_2849774_2850196	CP147906_2899135_2899590	CP147896_2859423_2859845	CP147897_2812045_2812467		CP147895_2831779_2832201	CP147899_2777548_2777970
group_998		hypothetical protein	8	609	none		CP147901_2896281_2898725	CP147906_2945689_2948133	CP147896_2908119_2908373	CP147897_2858552_2860996	CP147907_2948855_2951293	CP147895_2878285_2880729	CP147899_2824055_2826499
group_1439	oadG	oxaloacetate decarboxylase gamma chain;Na+-transporting oxaloacetate/methylmalonyl-CoA decarboxylase gamma subunit	503	106	none		CP147901_3076016_3076264	CP147906_3125327_3125575	CP147896_3085663_3085911	CP147897_3038282_3038527	CP147907_3128587_3128835	CP147895_3058020_3058268	CP147899_3003790_3004038
group_1144		glycosyl transferase;Glycosyl transferase family 2;hypothetical protein	538	3	none		CP147901_3114086_3114919	CP147906_3163406_3164239	CP147896_3123948_3124781	CP147897_3076565_3077398	CP147907_3166782_3167615	CP147895_3096458_3097135	CP147899_3041984_3042817
group_1510	wcaE	Glycosyltransferase family 2 protein;Glycosyl transferase;Glycosyltransferase cell wall biogenesis;hypothetical protein;glycosyltransferase family 2 protein;glycosyltransferase;Glycosyltransferase GT2 family	525	47	none		CP147901_3115112_3116890	CP147906_3164432_3166210	CP147896_3125051_3126751	CP147897_3077668_3079368	CP147907_3167808_3169586		CP147899_3043010_3044788
group_2205		Glycosyl transferase	2	973	none		CP147901_3115112_3116890	CP147906_3164432_3166210	CP147896_3125051_3126751	CP147897_3077668_3079368	CP147907_3167808_3169586		CP147899_3043010_3044788
group_685		Ybl27	38	380	Prophage			CP147906_3307480_3307812
group_147	xerD	integrase	39	374	Prophage			CP147906_3307921_3308937
group_1664		hypothetical protein	39	371	Prophage			CP147906_3309124_3309315
group_403		phage repressor protein	39	373	Prophage			CP147906_3309331_3309900
group_1357		regulator	39	372	Prophage			CP147906_3310026_3310247
group_1737		Phage regulatory protein CII (CP76);Protein ORFb in retron Ec67	46	364	Prophage	FljB_no-FljB_prophage	CP147901_1138950_1139459	CP147906_3310280_3310789
group_1815		DUF2724 domain-containing protein	45	365	Prophage	FljB_no-FljB_prophage	CP147901_1138742_1138942	CP147906_3310797_3310997
group_1841		DUF5347 domain-containing protein;Protein ORFc in retron Ec67	46	359	Prophage	FljB_no-FljB_prophage	CP147901_1138437_1138778	CP147906_3310961_3311302
group_1840		DUF2732 domain-containing protein	46	360	Prophage	FljB_no-FljB_prophage	CP147901_1138136_1138369	CP147906_3311370_3311603
group_1839	dksA	Prokaryotic dksA/traR C4-type zinc finger;RNA polymerase-binding transcription factor DksA	46	361	Prophage	FljB_no-FljB_prophage	CP147901_1137909_1138136	CP147906_3311603_3311830
group_1833	dam	DNA adenine methylase;Retron Ec67 DNA adenine methylase	46	362	Prophage	FljB_no-FljB_prophage	CP147901_1137055_1137912	CP147906_3311827_3312684
group_1816		Replication gene A protein;Bacteriophage replication gene A;replication endonuclease;endonuclease;Replication endonuclease	46	363	Prophage	FljB_no-FljB_prophage	CP147901_1134644_1137058	CP147906_3312681_3315095
group_1814		Levan regulatory protein;Levan regulatory protein RlsC similar to phage-related protein	61	348	Prophage	FljB_no-FljB_prophage	CP147901_1134302_1134490	CP147906_3315249_3315437
group_240		DUF6694 domain-containing protein	38	382	Prophage			CP147906_3315913_3316719
group_1680		hypothetical protein	38	375	Prophage			CP147906_3317427_3318533
group_560		hypothetical protein	38	381	Prophage			CP147906_3318546_3318980
group_1244		hypothetical protein	38	376	Prophage			CP147906_3318980_3319645
group_1871		phage portal protein;hypothetical protein	70	330	Prophage	FljB_no-FljB_prophage	CP147901_1131033_1132067	CP147906_3319715_3320749
group_1874	yjcR	putative conserved protein YjcR contains N-terminal HTH domain;Terminase ATPase subunit;oxidoreductase	69	341	Prophage	FljB_no-FljB_prophage	CP147901_1129267_1131033	CP147906_3321151_3322515
group_1877		Capsid scaffolding protein;capsid protein	69	340	Prophage	FljB_no-FljB_prophage	CP147901_1128291_1129124	CP147906_3322658_3323491
group_1878		phage major capsid protein P2 family;P2 family phage major capsid protein	69	339	Prophage	FljB_no-FljB_prophage	CP147901_1127216_1128274	CP147906_3324198_3324566
group_1882		Terminase endonuclease subunit;Phage small terminase subunit	69	338	Prophage	FljB_no-FljB_prophage	CP147901_1126562_1127212	CP147906_3324570_3325220
group_1883		Capsid completion protein;head completion/stabilization protein	69	337	Prophage	FljB_no-FljB_prophage	CP147901_1126002_1126466	CP147906_3325316_3325780
group_1884	gpX	P2-like prophage tail protein X;phage tail protein	69	336	Prophage	FljB_no-FljB_prophage	CP147901_1125799_1126002	CP147906_3325780_3325983
group_1886		Holin;Bacteriophage holin family HP1	69	335	Prophage	FljB_no-FljB_prophage	CP147901_1125580_1125795	CP147906_3325987_3326202
group_1887	rrrD	Phage-related lysozyme (muramidase) GH24 family;glycoside hydrolase	69	334	Prophage	FljB_no-FljB_prophage	CP147901_1125087_1125599	CP147906_3326183_3326695
group_621		Putative membrane protein	42	367	Prophage	FljB_no-FljB_prophage	CP147901_1124708_1125085	CP147906_3326697_3327074
group_1888	lysB	Rz-like lysis system protein LysB	69	333	Prophage	FljB_no-FljB_prophage	CP147901_1124283_1124711	CP147906_3327071_3327499
group_1890		Phage tail protein;phage tail protein	69	331	Prophage	FljB_no-FljB_prophage	CP147901_1123756_1124187	CP147906_3327595_3328026
group_1889		phage virion morphogenesis protein	69	332	Prophage	FljB_no-FljB_prophage	CP147901_1123317_1123763	CP147906_3328019_3328465
group_1885	gpV	Phage P2 baseplate assembly protein gpV;phage baseplate assembly protein V	73	325	Prophage	FljB_no-FljB_prophage	CP147901_1122670_1123248	CP147906_3328534_3329112
group_1881		Phage baseplate assembly protein W;baseplate assembly protein	73	326	Prophage	FljB_no-FljB_prophage	CP147901_1122314_1122673	CP147906_3329109_3329468
group_1880		Phage baseplate assembly protein J;baseplate assembly protein	73	327	Prophage	FljB_no-FljB_prophage	CP147901_1121419_1122327	CP147906_3329455_3330363
group_1879	gpI	phage tail protein I	73	328	Prophage	FljB_no-FljB_prophage	CP147901_1120821_1121426	CP147906_3330356_3330961
group_1876		Tail fiber protein;Phage tail protein;hypothetical protein	73	329	Prophage	FljB_no-FljB_prophage	CP147901_1119733_1120824	CP147906_3330958_3332475
group_1156		tail fiber assembly protein	40	369	Prophage			CP147906_3332478_3332888
group_849		hypothetical protein	40	370	Prophage			CP147906_3332869_3333102
group_1725		phage tail protein;Phage tail protein	40	368	Prophage			CP147906_3333105_3333578
pinE~~~spoIVCA	pinE;spoIVCA	site-specific DNA recombinase;DNA-invertase	64	343	Prophage	FljB_no-FljB_prophage	CP147901_1185266_1185832	CP147906_3333609_3334175					CP147899_1119834_1120388
group_1866		Phage tail sheath protein FI;phage tail protein	79	318	Prophage	FljB_no-FljB_prophage	CP147901_1185975_1187147	CP147906_3334318_3335490
group_1864		phage major tail tube protein	79	319	Prophage	FljB_no-FljB_prophage	CP147901_1187157_1187672	CP147906_3335500_3336015
group_1863		Phage tail assembly protein;phage tail assembly protein	79	320	Prophage	FljB_no-FljB_prophage	CP147901_1187727_1188029	CP147906_3336070_3336372
group_1859		Phage tail tape measure protein;phage tail tape measure protein	79	321	Prophage	FljB_no-FljB_prophage	CP147901_1188156_1191233	CP147906_3336499_3339576
group_1854		Phage protein U;phage tail protein	79	322	Prophage	FljB_no-FljB_prophage	CP147901_1191230_1191715	CP147906_3339573_3340058
group_1842	gpD	Phage protein D;contractile injection system protein VgrG/Pvc8 family;late control protein D	49	357	Prophage	FljB_no-FljB_prophage	CP147901_1191712_1192812	CP147906_3340055_3341155
group_1809		transcriptional regulator	42	366	Prophage	FljB_no-FljB_prophage	CP147901_1192903_1193121	CP147906_3341246_3341464
group_1104		Bactoprenol-linked glucose translocase	505	80	none		CP147901_3281637_3281999	CP147906_3365635_3365997	CP147896_3291497_3291859	CP147897_3244112_3244474	CP147907_3333982_3334344	CP147895_3263846_3264208	CP147899_3209534_3209896
oadB~~~oadB2	oadB;oadB2	sodium ion-translocating decarboxylase subunit beta;Na+-transporting oxaloacetate/methylmalonyl-CoA decarboxylase beta subunit;Oxaloacetate decarboxylase beta chain 2	319	203	none		CP147901_3840491_3841792	CP147906_3924629_3925930	CP147896_3891602_3892903	CP147897_3803067_3804368	CP147907_3893013_3894314	CP147895_3863947_3865248	CP147899_3809639_3810940
group_1606		Ig-like domain-containing protein;Giant non-fimbrial adhesion protein;hypothetical protein	75	324	none		CP147901_4301100_4306574	CP147906_4341524_4346998	CP147896_4384225_4389699	CP147897_4299065_4304539	CP147907_4309679_4315153	CP147895_4324469_4329943	CP147899_4270235_4275709
group_1473		Phage tail assembly protein;tail fiber assembly protein;Phage tail protein	501	119	Prophage	FljB_no-FljB_prophage	CP147901_1143950_1144351	CP147906_4368810_4369217	CP147896_1158807_1159208	CP147897_1158765_1159166		CP147895_1158755_1159156
group_1231		hypothetical protein;Sb23	505	77	Prophage	FljB_no-FljB_prophage	CP147901_1145439_1146026	CP147906_4371339_4371926	CP147896_1157132_1157719	CP147897_1157090_1157677	CP147907_1934300_1934887	CP147895_1157080_1157667
group_129		phage baseplate protein	4	753	Prophage			CP147906_4371929_4373008			CP147907_1933218_1934297
group_582		Phage protein GP46	506	71	Prophage	FljB_no-FljB_prophage	CP147901_1146216_1146629	CP147906_4373001_4373414	CP147896_1156529_1156942	CP147897_1156487_1156900	CP147907_1932812_1933225	CP147895_1156477_1156890
group_1751		hypothetical protein;phage tail tape measure protein	505	73	Prophage	FljB_no-FljB_prophage	CP147901_1150088_1152013	CP147906_4376380_4378308	CP147896_1151145_1153070	CP147897_1151103_1153028		CP147895_1151093_1153018
group_692		Sb15	505	83	Prophage	FljB_no-FljB_prophage	CP147901_1152098_1152424	CP147906_4378392_4378718	CP147896_1150734_1151060	CP147897_1150692_1151018		CP147895_1150682_1151008
group_647		Phage tail protein	504	93	Prophage	FljB_no-FljB_prophage	CP147901_1152421_1152777	CP147906_4378715_4379071	CP147896_1150381_1150737	CP147897_1150339_1150695		CP147895_1150329_1150685
group_1629		phage tail protein;Sb13	505	74	Prophage	FljB_no-FljB_prophage	CP147901_1152777_1154273	CP147906_4379071_4380567	CP147896_1148885_1150381	CP147897_1148843_1150339		CP147895_1148833_1150329
group_1161		DUF2635 domain-containing protein	505	79	Prophage	FljB_no-FljB_prophage	CP147901_1154263_1154427	CP147906_4380574_4380720	CP147896_1148731_1148895	CP147897_1148689_1148853		CP147895_1148679_1148843
group_462		Prophage protein	505	85	Prophage	FljB_no-FljB_prophage	CP147901_1154988_1155500	CP147906_4381281_4381793	CP147896_1147658_1148170	CP147897_1147616_1148128	CP147907_1924430_1924942	CP147895_1147606_1148118
group_595		phage head closure protein	505	84	Prophage	FljB_no-FljB_prophage	CP147901_1155472_1155876	CP147906_4381765_4382169	CP147896_1147282_1147686	CP147897_1147240_1147644	CP147907_1924054_1924458	CP147895_1147230_1147634
group_695		head-tail connector protein	505	82	Prophage	FljB_no-FljB_prophage	CP147901_1155873_1156196	CP147906_4382166_4382489	CP147896_1146962_1147285	CP147897_1146920_1147243	CP147907_1923734_1924057	CP147895_1146910_1147233
group_1211		Sb7;Phage protein	505	78	Prophage	FljB_no-FljB_prophage	CP147901_1156199_1156399	CP147906_4382492_4382692	CP147896_1146759_1146959	CP147897_1146717_1146917	CP147907_1923531_1923731	CP147895_1146707_1146907
group_99		phage major capsid protein	504	97	Prophage	FljB_no-FljB_prophage	CP147901_1156450_1157655	CP147906_4382743_4383948	CP147896_1145503_1146708	CP147897_1145461_1146666	CP147907_1922275_1923480	CP147895_1145451_1146656
group_337		HK97 family phage prohead protease	504	95	Prophage	FljB_no-FljB_prophage	CP147901_1157670_1158320	CP147906_4383963_4384613	CP147896_1144838_1145488	CP147897_1144796_1145446	CP147907_1921610_1922260	CP147895_1144786_1145436
beeE	beeE	hypothetical protein;Phage portal protein BeeE;phage portal protein	505	76	Prophage	FljB_no-FljB_prophage	CP147901_1158298_1159539	CP147906_4384591_4385832	CP147896_1143619_1144860	CP147897_1143577_1144818	CP147907_1920391_1921632	CP147895_1143567_1144808
ymfR	ymfR	putative protein YmfR	505	81	Prophage	FljB_no-FljB_prophage	CP147901_1159539_1159721	CP147906_4385832_4386014	CP147896_1143437_1143619	CP147897_1143395_1143577	CP147907_1920209_1920391	CP147895_1143385_1143567
group_29		Putative terminase large subunit	4	754	Prophage			CP147906_4386026_4387759			CP147907_1918464_1920197
group_1832		DUF2570 domain-containing protein	503	100	Prophage	FljB_no-FljB_prophage	CP147901_1163522_1163914	CP147906_4389180_4389572	CP147896_1139244_1139636	CP147897_1139202_1139594		CP147895_1139192_1139584
group_1810		lysozyme;Endolysin	503	101	Prophage	FljB_no-FljB_prophage	CP147901_1163898_1164374	CP147906_4389556_4390032	CP147896_1138784_1139260	CP147897_1138742_1139218		CP147895_1138732_1139208
group_1708		phage holin lambda family	503	103	Prophage	FljB_no-FljB_prophage	CP147901_1164378_1164719	CP147906_4390036_4390371	CP147896_1138439_1138780	CP147897_1138397_1138738		CP147895_1138387_1138728
group_1681		hypothetical protein;Zf-TFIIB domain-containing protein	502	111	Prophage	FljB_no-FljB_prophage	CP147901_1164851_1165093	CP147906_4390509_4390751	CP147896_1138065_1138307	CP147897_1138023_1138265		CP147895_1138013_1138255
quuQ	quuQ	Prophage antitermination Q-like protein QuuQ	503	102	Prophage	FljB_no-FljB_prophage	CP147901_1165382_1166134	CP147906_4391040_4391792	CP147896_1137024_1137776	CP147897_1136982_1137734	CP147907_1913688_1914440	CP147895_1136972_1137724
group_1847		DNA-binding protein;KilA-N domain-containing protein	504	88	Prophage	FljB_no-FljB_prophage		CP147906_4392803_4393600	CP147896_1135474_1136013		CP147907_1911817_1912677
group_1827	rusA	Endodeoxyribonuclease RusA;Crossover junction endodeoxyribonuclease rusA	504	89	Prophage	FljB_no-FljB_prophage	CP147901_1168022_1168411	CP147906_4393620_4394009	CP147896_1134747_1135136	CP147897_1134705_1135094	CP147907_1911411_1911800	CP147895_1134695_1135084
group_694		LexA family transcriptional regulator	1	1313	Prophage			CP147906_4394006_4394332
group_1857		phage N-6-adenine-methyltransferase	504	87	Prophage	FljB_no-FljB_prophage	CP147901_1168408_1169061	CP147906_4394329_4394982	CP147896_1134097_1134750	CP147897_1134055_1134708	CP147907_1910521_1911414	CP147895_1134045_1134698
group_1862		Ybl78;Terminase;Uncharacterized protein YfdO;helix-turn-helix domain-containing protein;Replication protein O	502	110	Prophage	FljB_no-FljB_prophage	CP147901_1169545_1170489	CP147906_4395077_4396069	CP147896_1132669_1133613	CP147897_1132627_1133571		CP147895_1132617_1133561
ymfM	ymfM	Uncharacterized protein YmfM	1	1315	Prophage			CP147906_4396079_4396417
group_390		DNA-binding protein	1	1406	Prophage			CP147906_4396414_4396998
group_913		Cro/Cl family transcriptional regulator	1	1253	Prophage			CP147906_4397026_4397223
group_336		LexA family transcriptional repressor	1	1422	Prophage			CP147906_4397319_4397972
group_639		CPS-53 (KpLE1) prophage protein	1	1322	Prophage			CP147906_4398430_4398792
yfdQ	yfdQ	Uncharacterized protein YfdQ	1	1436	Prophage			CP147906_4398858_4399682
yfdR	yfdR	5'-deoxynucleotidase	1	1391	Prophage			CP147906_4399811_4400347
group_212		Phosphoadenosine phosphosulfate reductase family	1	1442	Prophage			CP147906_4400338_4401216
group_503		Ead/Ea22-like family protein	1	1371	Prophage			CP147906_4401213_4401686
group_749		hypothetical protein	1	1303	Prophage			CP147906_4401688_4401975
group_40		3'-5' exoribonuclease	1	1488	Prophage			CP147906_4401979_4403562
group_773		pyocin activator protein PrtN	1	1295	Prophage			CP147906_4403599_4403871
group_521		hypothetical protein	1	1366	Prophage			CP147906_4403905_4404366
group_399		DUF4065 domain-containing protein	1	1403	Prophage			CP147906_4404372_4404947
group_1795	oadA	Oxaloacetate decarboxylase alpha chain;hypothetical protein;pyruvate carboxylase subunit B;biotin/lipoyl-binding protein;Biotin/lipoyl-binding protein;sodium-extruding oxaloacetate decarboxylase subunit alpha	539	1	none		CP147901_512693_514462	CP147906_512417_514186		CP147897_512689_514458		CP147895_512681_514450	CP147899_512669_514438
oadB~~~oadA~~~oadB2	oadB;oadA;oadB2	sodium ion-translocating decarboxylase subunit beta;Na+-transporting oxaloacetate/methylmalonyl-CoA decarboxylase beta subunit;sodium-extruding oxaloacetate decarboxylase subunit alpha;Oxaloacetate decarboxylase (Na(+) extruding);Glutaconyl-CoA decarboxylase subunit beta;Oxaloacetate decarboxylase beta chain 2	505	75	none		CP147901_514475_515776	CP147906_514199_514639		CP147897_514471_515772		CP147895_514463_515764	CP147899_514451_515344
group_814		glutamate-cysteine ligase family protein	534	6	none		CP147901_3266633_3266881		CP147896_3276493_3276741	CP147897_3229108_3229356		CP147895_3248842_3249090	CP147899_3194530_3194778
group_325		Sugar kinase	533	7	none		CP147901_1753907_1754584		CP147896_1719765_1720442	CP147897_1719064_1719741		CP147895_1753727_1754404	CP147899_1680972_1681649
group_1758		translation initiation factor IF-2;Translation initiation factor IF-2	523	48	Prophage	SopE_prophage	CP147901_3986856_3987611		CP147896_2819320_2820075	CP147897_3950114_3950869		CP147895_4010310_4011065	CP147899_3956006_3956761
group_1339		hypothetical protein;lytic transglycosylase catalytic;Putative bacteriophage protein	523	49	Prophage	SopE_prophage	CP147901_3981163_3983115		CP147896_2823816_2825768	CP147897_3944421_3946373	CP147907_2867521_2869473	CP147895_4004617_4006569	CP147899_3950313_3952265
group_723		Bacteriophage protein	523	50	Prophage	SopE_prophage	CP147901_3983769_3984071		CP147896_2822860_2823162	CP147897_3947027_3947329	CP147907_2866565_2866867	CP147895_4007223_4007525	CP147899_3952919_3953221
group_680		Putative glucosylceramidase	523	51	none		CP147901_4115540_4115875		CP147896_4163958_4164293	CP147897_4078797_4079132		CP147895_4138993_4139328	CP147899_4084689_4085024
group_671		Exported protein	523	52	Prophage	SopE_prophage	CP147901_3985102_3985443		CP147896_2821488_2821829	CP147897_3948360_3948701	CP147907_2865193_2865534	CP147895_4008556_4008897	CP147899_3954252_3954593
group_338		Bacteriophage protein	523	53	Prophage	SopE_prophage	CP147901_3983115_3983765		CP147896_2823166_2823816	CP147897_3946373_3947023	CP147907_2866871_2867521	CP147895_4006569_4007219	CP147899_3952265_3952915
group_143		Phage related protein	523	54	Prophage	SopE_prophage	CP147901_3984074_3985105		CP147896_2821826_2822857	CP147897_3947332_3948363	CP147907_2865531_2866562	CP147895_4007528_4008559	CP147899_3953224_3954255
group_496		Phosphoglycerol transferase I (Phosphatidylglycerol--membrane-oligosaccharide glycerophosphotransferase)	522	55	Prophage	SopE_prophage	CP147901_3951006_3951488		CP147896_4002118_4002600	CP147897_3913591_3914073		CP147895_3974460_3974942	CP147899_3920156_3920638
group_1395		hypothetical protein;TPR-REGION domain-containing protein	520	56	Prophage	SopE_prophage	CP147901_3985638_3986369		CP147896_2820562_2821293	CP147897_3948896_3949627		CP147895_4009092_4009823	CP147899_3954788_3955519
group_564		Phage protein	520	57	Prophage	SopE_prophage	CP147901_3986369_3986797		CP147896_2820134_2820562	CP147897_3949627_3950055		CP147895_4009823_4010251	CP147899_3955519_3955947
group_444		Sb19	506	72	none
group_865		Phage protein	504	91	Prophage	FljB_prophage	CP147901_1170486_1170710		CP147896_1132448_1132672	CP147897_1132406_1132630	CP147907_1908998_1909222	CP147895_1132396_1132620
group_864		Sb39	504	92	Prophage	FljB_prophage	CP147901_1172444_1172668		CP147896_1130490_1130714	CP147897_1130448_1130672	CP147907_1907040_1907264	CP147895_1130438_1130662
group_415		Transcriptional regulator	504	94	Prophage	FljB_prophage	CP147901_1171861_1172415		CP147896_1130743_1131297	CP147897_1130701_1131255	CP147907_1907293_1907847	CP147895_1130691_1131245
group_306		Regulatory protein	504	96	Prophage	FljB_prophage	CP147901_1172766_1173461		CP147896_1129697_1130392	CP147897_1129655_1130350	CP147907_1906247_1906942	CP147895_1129645_1130340
group_1571		DUF2303 domain-containing protein;Uncharacterized conserved protein	503	104	Prophage	FljB_prophage	CP147901_1174979_1175806		CP147896_1127352_1128179	CP147897_1127310_1128137	CP147907_1903720_1904547	CP147895_1127300_1128127
group_1451		hypothetical protein;putative bacteriophage protein	503	105	Prophage	FljB_prophage	CP147901_1170707_1171864		CP147896_1131294_1132451	CP147897_1131252_1132409	CP147907_1907844_1909001	CP147895_1131242_1132399
perC	perC	PerC family transcriptional regulator	503	108	Prophage	FljB_prophage	CP147901_1169061_1169543		CP147896_1133615_1134097	CP147897_1133573_1134055	CP147907_1910039_1910521	CP147895_1133563_1134045
group_443		Phage protein	503	109	Prophage	FljB_prophage	CP147901_1174388_1174921		CP147896_1128237_1128770	CP147897_1128195_1128728	CP147907_1904605_1905138	CP147895_1128185_1128718
group_1548		site-specific integrase;Phage integrase	502	112	Prophage	FljB_prophage	CP147901_1177651_1178826		CP147896_1124332_1125507	CP147897_1124290_1125465		CP147895_1124280_1125455
group_1218		excisionase;Excisionase	502	114	Prophage	FljB_prophage	CP147901_1177472_1177690		CP147896_1125468_1125686	CP147897_1125426_1125632		CP147895_1125416_1125634
group_1186		hypothetical protein;Phage protein	502	115	Prophage	FljB_prophage	CP147901_1149622_1150071		CP147896_1153087_1153536	CP147897_1153045_1153494		CP147895_1153035_1153484
group_1026		hypothetical protein	502	116	Prophage	FljB_prophage	CP147901_1143469_1143561		CP147896_1159597_1159689	CP147897_1159555_1159647		CP147895_1159545_1159637
group_845		HicA-like toxin	502	118	Prophage	FljB_prophage	CP147901_1173680_1173913		CP147896_1129245_1129478	CP147897_1129203_1129436		CP147895_1129193_1129426
lemA	lemA	hypothetical protein;LemA family protein	501	120	Prophage	FljB_prophage	CP147901_1162562_1162996		CP147896_1140162_1140596	CP147897_1140120_1140554		CP147895_1140110_1140544
group_1288		Uncharacterized protein YfdR;HD family hydrolase	501	121	Prophage	FljB_prophage	CP147901_1175943_1176467		CP147896_1126691_1127215	CP147897_1126649_1127173	CP147907_1903044_1903583	CP147895_1126639_1127163
tnp	tnp	IS200/IS605 family IS200F transposase	497	122	tnp	tnp
pilZ	pilZ	hypothetical protein;Pilus assembly protein PilZ	487	125	Prophage	FljB_prophage	CP147901_1178867_1179706		CP147896_1123452_1124291	CP147897_1123410_1124249		CP147895_1123688_1124239
group_1402		phage tail protein;Phage tail protein	467	126	Prophage	FljB_prophage	CP147901_1144358_1145452		CP147896_1157706_1158800	CP147897_1157664_1158758		CP147895_1157654_1158748
group_1767		hypothetical protein;DUF4220 domain-containing protein	451	128	Prophage	FljB_prophage	CP147901_1176576_1177442		CP147896_1125716_1126582	CP147897_1125674_1126540		CP147895_1125664_1126530
dec	dec	Decoration protein	411	129	Prophage				CP147896_3560474_3560878			CP147895_3532817_3533221	CP147899_3478512_3478916
ninB	ninB	recombination protein NinB;Recombination protein NinB	411	130	Prophage				CP147896_3566308_3566754			CP147895_3538651_3539097	CP147899_3484346_3484792
group_1713		hypothetical protein;Bestrophin-like protein	411	131	Prophage				CP147896_3566711_3567007			CP147895_3539054_3539350	CP147899_3484749_3485045
ninF	ninF	Protein ninF	411	132	Prophage				CP147896_3565482_3565658			CP147895_3537825_3538001	CP147899_3483520_3483696
group_930	ninH	Protein ninH	411	133	Prophage				CP147896_3564450_3564638			CP147895_3536793_3536981	CP147899_3482488_3482676
group_1855		endorhamnosidase;hypothetical protein;phage head-binding domain-containing protein;Tailspike protein;PhageP22-tail domain-containing protein;Tail spike protein	410	134	Prophage				CP147896_3543708_3545711			CP147895_3516051_3518054	CP147899_3461746_3463749
group_1805		16;DNA transfer protein	410	135	Prophage				CP147896_3546548_3548479			CP147895_3518891_3520822	CP147899_3464586_3466517
group_1750		Phage stabilisation protein;Packaged DNA stabilization protein gp10	410	136	Prophage				CP147896_3551648_3553066			CP147895_3523991_3525409	CP147899_3469686_3471104
group_1745		portal protein;Portal protein	410	137	Prophage				CP147896_3556328_3558505			CP147895_3528671_3530848	CP147899_3474366_3476543
group_1689		DNA transfer protein;Ejection protein	410	138	Prophage				CP147896_3548479_3549849			CP147895_3520822_3522192	CP147899_3466517_3467887
int	int	Integrase;tyrosine-type recombinase/integrase	410	139	Prophage				CP147896_3580550_3581713			CP147895_3552893_3554056	CP147899_3498588_3499751
group_1457		hypothetical protein;DUF1902 domain-containing protein	410	140	Prophage				CP147896_3574259_3574552			CP147895_3546602_3546895	CP147899_3492297_3492590
group_1447		hypothetical protein;C2	410	141	Prophage				CP147896_3571062_3571697			CP147895_3543405_3544040	CP147899_3489100_3489735
group_1390		phage tail protein;Head completion protein	410	142	Prophage				CP147896_3551006_3551644			CP147895_3523349_3523987	CP147899_3469044_3469682
group_1176		hypothetical protein;Peptidoglycan hydrolase gp4	410	143	Prophage				CP147896_3553026_3553526			CP147895_3525369_3525869	CP147899_3471064_3471564
group_1131		hypothetical protein;Scaffolding protein	410	144	Prophage				CP147896_3555403_3556314			CP147895_3527746_3528657	CP147899_3473441_3474352
group_961		DUF2737 domain-containing protein	410	145	Prophage				CP147896_3576660_3576830			CP147895_3549003_3549173	CP147899_3494698_3494868
group_915		Restriction endonuclease	410	146	Prophage				CP147896_3574028_3574222			CP147895_3546371_3546565	CP147899_3492066_3492260
group_885		RNA-directed DNA polymerase	410	147	Prophage				CP147896_3565277_3565489			CP147895_3537620_3537832	CP147899_3483315_3483527
group_825		DUF2560 domain-containing protein	410	148	Prophage				CP147896_3560881_3561123			CP147895_3533224_3533466	CP147899_3478919_3479161
abc2	abc2	Anti-RecBCD protein 2	410	149	Prophage				CP147896_3576356_3576649			CP147895_3548699_3548992	CP147899_3494394_3494687
rusA	rusA	Crossover junction endodeoxyribonuclease rusA	410	150	Prophage				CP147896_3564635_3564997			CP147895_3536978_3537340	CP147899_3482673_3483035
group_525		Protein gp14	410	151	Prophage				CP147896_3550551_3551006			CP147895_3522894_3523349	CP147899_3468589_3469044
group_332		Ead/Ea22-like family protein	410	152	Prophage				CP147896_3576827_3577486			CP147895_3549170_3549829	CP147899_3494865_3495524
group_311		DNA transfer protein gp7	410	153	Prophage				CP147896_3549859_3550548			CP147895_3522202_3522891	CP147899_3467897_3468586
group_82		Major capsid protein	410	154	Prophage				CP147896_3554111_3555403			CP147895_3526454_3527746	CP147899_3472149_3473441
group_1730		antitermination protein;Antitermination protein Q	409	155	Prophage				CP147896_3563830_3564453			CP147895_3536173_3536796	CP147899_3481868_3482491
group_1723	fumD	hypothetical protein;fumarate hydratase FumD	409	156	Prophage				CP147896_3572339_3572548			CP147895_3544682_3544891	CP147899_3490377_3490586
group_1399		DNA-packaging protein;Terminase small subunit	409	157	Prophage				CP147896_3559982_3560470			CP147895_3532325_3532813	CP147899_3478020_3478508
group_1378		Bacteriophage terminase large (ATPase) subunit and inactivated derivatives;DNA packaging protein gp2 (Terminase large subunit);Terminase large subunit	409	158	Prophage				CP147896_3558505_3560004			CP147895_3530848_3532347	CP147899_3476543_3478042
group_1307		Ead/Ea22-like protein;Ead/Ea22-like family protein	409	159	Prophage				CP147896_3577483_3577983			CP147895_3549826_3550326	CP147899_3495521_3496021
group_995		Conserved membrane protein	409	160	Prophage				CP147896_3580183_3580320			CP147895_3552526_3552663	CP147899_3498221_3498358
group_987		DNA recombinase	409	161	Prophage				CP147896_3575178_3575321			CP147895_3547521_3547664	CP147899_3493216_3493359
mafI	mafI	MafI family immunity protein	409	162	Prophage				CP147896_3567342_3567494			CP147895_3539685_3539837	CP147899_3485380_3485532
group_931		Kil	409	163	Prophage				CP147896_3575000_3575188			CP147895_3547343_3547531	CP147899_3493038_3493226
group_895		Phage protein	409	164	Prophage				CP147896_3567509_3567715			CP147895_3539852_3540058	CP147899_3485547_3485753
group_821		Phage protein	409	165	Prophage				CP147896_3572055_3572300			CP147895_3544398_3544643	CP147899_3490093_3490338
group_816		Regulatory protein	409	166	Prophage				CP147896_3545847_3546095			CP147895_3518190_3518438	CP147899_3463885_3464133
group_752		ASCH domain-containing protein	409	167	Prophage				CP147896_3579827_3580111			CP147895_3552170_3552454	CP147899_3497865_3498149
abc1	abc1	Anti-RecBCD protein 1	409	168	Prophage				CP147896_3576025_3576309				CP147899_3494063_3494347
ybcO	ybcO	82 prophage-derived putative protein ybcO	409	169	Prophage				CP147896_3564994_3565284			CP147895_3537337_3537627	CP147899_3483032_3483322
hicB	hicB	Type II toxin-antitoxin system HicB family antitoxin	409	170	Prophage				CP147896_3567010_3567330			CP147895_3539353_3539673	CP147899_3485048_3485368
group_693		phage holin lambda family	409	171	Prophage				CP147896_3563069_3563395			CP147895_3535412_3535738	CP147899_3481107_3481433
group_670		DUF2591 domain-containing protein	409	172	Prophage				CP147896_3565651_3565992			CP147895_3537994_3538335	CP147899_3483689_3484030
group_555		Endolysin	409	173	Prophage				CP147896_3562648_3563085			CP147895_3534991_3535428	CP147899_3480686_3481123
group_507		Bacteriophage lysis protein	409	174	Prophage				CP147896_3562181_3562651			CP147895_3534524_3534994	CP147899_3480219_3480689
group_459		KilA-N domain-containing protein	409	175	Prophage				CP147896_3561447_3561968			CP147895_3533790_3534311	CP147899_3479485_3480006
group_409		Prophage protein	409	176	Prophage				CP147896_3553510_3554070			CP147895_3525853_3526413	CP147899_3471548_3472108
sieB	sieB	SieB	409	177	Prophage				CP147896_3573227_3573814			CP147895_3545570_3546157	CP147899_3491265_3491852
group_300		Recombinase	409	178	Prophage				CP147896_3575318_3576025			CP147895_3547661_3548368	CP147899_3493356_3494063
group_270		DUF429 domain-containing protein	409	179	Prophage				CP147896_3577983_3578738			CP147895_3550326_3551081	CP147899_3496021_3496776
group_125		DUF550 domain-containing protein	409	180	Prophage				CP147896_3578749_3579834			CP147895_3551092_3552177	CP147899_3496787_3497872
dnaB	dnaB	Replicative DNA helicase	409	181	Prophage				CP147896_3567791_3569227			CP147895_3540134_3541570	CP147899_3485829_3487265
group_1698		hypothetical protein;putative regulatory protein N	408	182	Prophage				CP147896_3572912_3573214			CP147895_3545255_3545557	CP147899_3490950_3491252
group_1433		Uncharacterized protein;putative protein	407	183	Prophage				CP147896_3570109_3570255			CP147895_3542452_3542598	CP147899_3488147_3488293
group_759		CII	407	184	Prophage				CP147896_3570290_3570571			CP147895_3542633_3542914	CP147899_3488328_3488609
group_1783		hypothetical protein;DNA replication protein;Gp18	406	185	Prophage				CP147896_3569217_3570116			CP147895_3541560_3542459	CP147899_3487255_3488154
group_1133		hypothetical protein;Uncharacterized protein in gtrB 5'region;glucosyltransferase domain-containing protein	375	188	Prophage				CP147896_3542192_3543649				CP147899_3460230_3461687
oadB~~~oadA	oadB;oadA	Oxaloacetate decarboxylase (Na(+) extruding);sodium ion-translocating decarboxylase subunit beta;Na+-transporting oxaloacetate/methylmalonyl-CoA decarboxylase beta subunit;sodium-extruding oxaloacetate decarboxylase subunit alpha	347	190	none
group_1845	xerD	integrase;Site-specific recombinase XerD	327	191	Prophage	FljB_prophage						CP147895_1161586_1162602
group_1771		hypothetical protein;CARD domain-containing protein	324	192	Prophage	FljB_prophage						CP147895_1160371_1161576
group_1610		hypothetical protein;Bacteriophage replication gene A	322	193	Prophage	FljB_prophage						CP147895_1166036_1168450
gpD	gpD	Phage protein D	322	194	Prophage	FljB_prophage						CP147895_1192736_1193836
dam	dam	Retron Ec67 DNA adenine methylase	322	195	Prophage	FljB_prophage						CP147895_1165182_1166039
group_1051	dksA	RNA polymerase-binding transcription factor DksA	322	196	Prophage	FljB_prophage						CP147895_1164958_1165185
group_1050		DUF2732 domain-containing protein	322	197	Prophage	FljB_prophage						CP147895_1164725_1164958
group_1049		Protein ORFc in retron Ec67	322	198	Prophage	FljB_prophage						CP147895_1164316_1164657
group_1048		DUF2724 domain-containing protein	322	199	Prophage	FljB_prophage						CP147895_1164152_1164352
group_1047		Protein ORFb in retron Ec67	322	200	Prophage	FljB_prophage						CP147895_1163635_1164144
group_1045		Rha family transcriptional regulator	322	201	Prophage	FljB_prophage						CP147895_1163359_1163601
group_350		Phage regulatory protein cI	322	202	Prophage	FljB_prophage						CP147895_1162605_1163237
group_1054		Lipoprotein	306	204	Prophage	FljB_prophage						CP147895_1169095_1169826
group_1053		DinI-like protein in retron Ec67	306	205	Prophage	FljB_prophage						CP147895_1168802_1169035
group_1052		Levan regulatory protein	306	206	Prophage	FljB_prophage						CP147895_1168603_1168791
group_1476		AIPR family protein;hypothetical protein;Abortive infection protein	305	207	Prophage	FljB_prophage						CP147895_1170140_1171804
lysB	lysB	Rz-like lysis system protein LysB	299	208	Prophage	FljB_prophage						CP147895_1178895_1179323
group_1065		phage virion morphogenesis protein	298	209	Prophage	FljB_prophage						CP147895_1179843_1180289
group_1064		Phage tail protein	298	210	Prophage	FljB_prophage						CP147895_1179419_1179850
group_1063	rrrD	Phage-related lysozyme (muramidase) GH24 family	298	211	Prophage	FljB_prophage						CP147895_1178383_1178898
group_1062		Holin	298	212	Prophage	FljB_prophage						CP147895_1178187_1178402
gpX	gpX	P2-like prophage tail protein X	298	213	Prophage	FljB_prophage						CP147895_1177980_1178183
group_1061		Capsid completion protein	298	214	Prophage	FljB_prophage						CP147895_1177516_1177980
group_1060		Terminase endonuclease subunit	298	215	Prophage	FljB_prophage						CP147895_1176772_1177422
group_1059		phage major capsid protein P2 family	298	216	Prophage	FljB_prophage						CP147895_1175707_1176768
group_1058		Capsid scaffolding protein	298	217	Prophage	FljB_prophage						CP147895_1174857_1175690
group_1057	yjcR	putative conserved protein YjcR contains N-terminal HTH domain	298	218	Prophage	FljB_prophage						CP147895_1172948_1174666
group_1056		phage portal protein	298	219	Prophage	FljB_prophage						CP147895_1171908_1172948
group_1478		hypothetical protein;ApeA-NTD1 domain-containing protein	297	220	Prophage	FljB_prophage						CP147895_1180291_1181142
group_1070		tail fiber assembly protein	294	221	Prophage	FljB_prophage						CP147895_1185497_1186072
group_1069		Tail fiber protein	294	222	Prophage	FljB_prophage						CP147895_1183644_1185497
gpI	gpI	phage tail protein I	294	223	Prophage	FljB_prophage						CP147895_1183042_1183647
group_1068		Phage baseplate assembly protein J	294	224	Prophage	FljB_prophage						CP147895_1182141_1183049
group_1067		Phage baseplate assembly protein W	294	225	Prophage	FljB_prophage						CP147895_1181795_1182154
gpV	gpV	Phage P2 baseplate assembly protein gpV	294	226	Prophage	FljB_prophage						CP147895_1181220_1181798
group_1479		phage major tail tube protein	291	227	Prophage	FljB_prophage						CP147895_1188451_1188966
group_1077		Phage protein U	291	228	Prophage	FljB_prophage						CP147895_1192254_1192739
group_1076		Phage tail tape measure protein	291	229	Prophage	FljB_prophage						CP147895_1189450_1192257
group_1075		Phage tail assembly protein	291	230	Prophage	FljB_prophage						CP147895_1189021_1189323
group_1074		Phage tail sheath protein FI	291	231	Prophage	FljB_prophage						CP147895_1187269_1188441
group_1072		DNA invertase-like protein	291	232	Prophage	FljB_prophage						CP147895_1186942_1187166
group_1791	oadB;oadA	Na+-transporting oxaloacetate/methylmalonyl-CoA decarboxylase beta subunit;sodium ion-translocating decarboxylase subunit beta;Oxaloacetate decarboxylase (Na(+) extruding);sodium-extruding oxaloacetate decarboxylase subunit alpha	269	233	none
gtrB	gtrB	Undecaprenyl phosphate 4-deoxy-4-formamido-L-arabinose transferase;Bactoprenol glucosyl transferase-like domain protein;Bactoprenol glucosyl transferase	267	234	Prophage				CP147896_3541270_3542202			CP147895_3513614_3514546	CP147899_3459308_3460240
group_1632	oadA	hypothetical protein;sodium-extruding oxaloacetate decarboxylase subunit alpha;biotin/lipoyl-binding protein;acetyl-CoA carboxylase biotin carboxyl carrier protein subunit;Oxaloacetate decarboxylase alpha chain;pyruvate carboxylase subunit B;Lipoyl-binding domain-containing protein	213	235	none				CP147896_3891188_3891589	CP147897_3801282_3803054	CP147907_3891228_3893000	CP147895_3862162_3863934	CP147899_3807854_3809626
group_1105		Bactoprenol-linked glucose translocase	161	236	Prophage				CP147896_3540911_3541273			CP147895_3513255_3513617	CP147899_3458949_3459311
oadB2~~~oadB	oadB2;oadB	Oxaloacetate decarboxylase beta chain 2;Na+-transporting oxaloacetate/methylmalonyl-CoA decarboxylase beta subunit;sodium ion-translocating decarboxylase subunit beta	158	237	none		CP147901_3072914_3074215		CP147896_3082561_3083862	CP147897_3035184_3036485	CP147907_3125707_3126783	CP147895_3054918_3056219	CP147899_3000688_3001989
oadA	oadA	sodium ion-translocating decarboxylase subunit beta;sodium-extruding oxaloacetate decarboxylase subunit alpha	156	238	none
group_906		phage tail protein	129	239	Prophage	SopE_prophage_P88			CP147896_4200227_4200427	CP147897_4113903_4114103
group_902		hypothetical protein	129	240	Prophage	SopE_prophage_P88			CP147896_4185953_4186156	CP147897_4128174_4128377
group_822		MarR family transcriptional regulator	129	241	Prophage	SopE_prophage_P88			CP147896_4186153_4186398	CP147897_4127932_4128177
group_710		hypothetical protein	129	242	Prophage	SopE_prophage_P88			CP147896_4186395_4186709	CP147897_4127621_4127935
group_1604		hypothetical protein;plasmid segregation protein ParM;recombinase	128	243	Prophage	SopE_prophage_P88			CP147896_4191345_4192304	CP147897_4122026_4122985
group_1456		head completion/stabilization protein;Head completion/stabilization protein L;capsid assembly protein	128	244	Prophage	SopE_prophage_P88			CP147896_4199733_4200227	CP147897_4114103_4114597
group_1397		Peptidase M15;peptidase M15	128	245	Prophage	SopE_prophage_P88			CP147896_4200750_4201142	CP147897_4113188_4113580
group_992		hok/gef family protein	128	246	Prophage	SopE_prophage_P88			CP147896_4216244_4216384	CP147897_4097946_4098086
group_793		Ogr/Delta-like zinc finger	128	247	Prophage	SopE_prophage_P88			CP147896_4215793_4216053	CP147897_4098277_4098537
group_730		Helix-turn-helix transcriptional regulator	128	248	Prophage	SopE_prophage_P88			CP147896_4183553_4183852	CP147897_4130478_4130777
group_715		chromosome partitioning protein	128	249	Prophage	SopE_prophage_P88			CP147896_4192309_4192620	CP147897_4121710_4122021
group_698		holin	128	250	Prophage	SopE_prophage_P88			CP147896_4200430_4200753	CP147897_4113577_4113900
group_657		baseplate assembly protein	128	251	Prophage	SopE_prophage_P88			CP147896_4203354_4203704	CP147897_4110626_4110976
group_1441		Late control gene D protein;Gene late control D protein;late control protein	127	252	Prophage	SopE_prophage_P88			CP147896_4214641_4215750	CP147897_4098580_4099689
group_1424		hypothetical protein;DUF4760 domain-containing protein	127	253	Prophage	SopE_prophage_P88			CP147896_4192711_4193214	CP147897_4121116_4121619
group_1419		hypothetical protein	127	254	Prophage	SopE_prophage_P88			CP147896_4216536_4216817	CP147897_4097513_4097794
group_1380		Ash protein family;Ash family protein	127	255	Prophage	SopE_prophage_P88			CP147896_4187771_4188001	CP147897_4126329_4126559
group_1241		oxidoreductase	127	256	Prophage	SopE_prophage_P88			CP147896_4194967_4196718	CP147897_4117612_4119363
group_1014		Membrane protein	127	257	Prophage	SopE_prophage_P88			CP147896_4185314_4185427	CP147897_4128903_4129016
group_760		hypothetical protein	127	258	Prophage	SopE_prophage_P88			CP147896_4184785_4185063	CP147897_4129267_4129545
group_656		DUF4761 domain-containing protein	127	259	Prophage	SopE_prophage_P88			CP147896_4184424_4184774	CP147897_4129556_4129906
group_592		DUF2570 domain-containing protein	127	260	Prophage	SopE_prophage_P88			CP147896_4201139_4201546	CP147897_4112784_4113191
group_588		Phage protein	127	261	Prophage	SopE_prophage_P88			CP147896_4185520_4185930	CP147897_4128400_4128810
group_568		Regulatory phage protein cox	127	262	Prophage	SopE_prophage_P88			CP147896_4183961_4184386	CP147897_4129944_4130369
group_511		phage tail protein	127	263	Prophage	SopE_prophage_P88			CP147896_4201684_4202151	CP147897_4112179_4112646
group_493		hypothetical protein	127	264	Prophage	SopE_prophage_P88			CP147896_4186749_4187234	CP147897_4127096_4127581
group_391		phage baseplate assembly protein V	127	265	Prophage	SopE_prophage_P88			CP147896_4202776_4203357	CP147897_4110973_4111554
group_200		baseplate assembly protein	127	266	Prophage	SopE_prophage_P88			CP147896_4203708_4204604	CP147897_4109726_4110622
group_137		phage portal protein	127	267	Prophage	SopE_prophage_P88			CP147896_4193921_4194967	CP147897_4119363_4120409
group_1608		phage tail sheath family protein;phage tail protein	126	268	Prophage	SopE_prophage_P88			CP147896_4213299_4214483	CP147897_4099847_4101031
group_1398		hypothetical protein;Phage tail protein	126	269	Prophage	SopE_prophage_P88			CP147896_4205130_4207067	CP147897_4107263_4109200
group_827		DUF4754 domain-containing protein	126	270	Prophage	SopE_prophage_P88			CP147896_4185075_4185317	CP147897_4129013_4129255
group_632		Phage protein	126	271	Prophage	SopE_prophage_P88			CP147896_4188074_4188439	CP147897_4125891_4126256
group_631		phage tail protein	126	272	Prophage	SopE_prophage_P88			CP147896_4212367_4212732	CP147897_4101598_4101963
group_489		oxidoreductase	126	273	Prophage	SopE_prophage_P88			CP147896_4208908_4209396	CP147897_4104934_4105422
group_452		phage tail protein I	126	274	Prophage	SopE_prophage_P88			CP147896_4204597_4205127	CP147897_4109203_4109733
group_342		phage virion morphogenesis protein	126	275	Prophage	SopE_prophage_P88			CP147896_4202135_4202779	CP147897_4111551_4112195
group_244		terminase	126	276	Prophage	SopE_prophage_P88			CP147896_4198831_4199631	CP147897_4114699_4115499
group_226		phage capsid protein	126	277	Prophage	SopE_prophage_P88			CP147896_4196873_4197709	CP147897_4116621_4117457
group_162		integrase	126	278	Prophage	SopE_prophage_P88			CP147896_4182491_4183486	CP147897_4130844_4131839
group_134		phage major capsid protein P2 family	126	279	Prophage	SopE_prophage_P88			CP147896_4197733_4198785	CP147897_4115545_4116597
group_6		phage tail tape measure protein	126	280	Prophage	SopE_prophage_P88			CP147896_4209409_4212216	CP147897_4102114_4104921
group_5		Replication endonuclease	126	281	Prophage	SopE_prophage_P88			CP147896_4188446_4191268	CP147897_4123062_4125884
group_1410		phage major tail tube protein;Major tail tube protein FII	125	282	Prophage	SopE_prophage_P88			CP147896_4212787_4213299	CP147897_4101031_4101543
group_1600		tail fiber assembly protein;Tail fiber assembly protein;phage tail protein	118	283	Prophage	SopE_prophage_P88			CP147896_4207074_4207481	CP147897_4106849_4107256
group_1396		hypothetical protein	101	288	Prophage	SopE_prophage			CP147896_4025999_4026367	CP147897_3939980_3940348	CP147907_2873546_2873914
group_1115		phage holin lambda family	101	290	Prophage	SopE_prophage			CP147896_4015100_4015357
group_1703		DUF4054 domain-containing protein	100	297	Prophage	SopE_prophage			CP147896_4026321_4026740	CP147897_3940302_3940721	CP147907_2873173_2873592
group_1844	gH19	Chitinase GH19 family;endolysin	99	299	Prophage	SopE_prophage			CP147896_4017269_4017895	CP147897_3931250_3931876	CP147907_2882018_2882644
group_1644		phage head morphogenesis protein;phage minor head protein	99	300	Prophage	SopE_prophage			CP147896_4022647_4023255	CP147897_3936628_3937236	CP147907_2876658_2877266
group_1598		Bacteriophage protein;DUF2184 domain-containing protein	99	301	Prophage	SopE_prophage			CP147896_4025016_4025957	CP147897_3938997_3939938	CP147907_2873956_2874897
group_1222		Putative bacteriophage protein	99	302	Prophage	SopE_prophage			CP147896_4027657_4028205	CP147897_3941638_3942186	CP147907_2871708_2872256
group_1164		TerL protein	99	303	Prophage	SopE_prophage			CP147896_4019542_4021164	CP147897_3933523_3935145	CP147907_2878749_2880371
group_788		hypothetical protein	99	304	Prophage	SopE_prophage			CP147896_4018577_4018840	CP147897_3932558_3932821	CP147907_2881073_2881336
group_609		head-tail adaptor	99	305	Prophage	SopE_prophage			CP147896_4027278_4027667	CP147897_3941259_3941648	CP147907_2872246_2872635
group_494		Lysis protein	99	306	Prophage	SopE_prophage			CP147896_4017892_4018377	CP147897_3931873_3932358	CP147907_2881536_2882021
group_481		Putative bacteriophage protein	99	307	Prophage	SopE_prophage			CP147896_4024507_4025004	CP147897_3938488_3938985	CP147907_2874909_2875406
group_417		Bacteriophage protein	99	308	Prophage	SopE_prophage			CP147896_4026737_4027291	CP147897_3940718_3941272	CP147907_2872622_2873176
group_91		DUF2213 domain-containing protein	99	309	Prophage	SopE_prophage			CP147896_4023270_4024502	CP147897_3937251_3938483	CP147907_2875411_2876643
group_55		DUF1073 domain-containing protein	99	310	Prophage	SopE_prophage			CP147896_4021164_4022633	CP147897_3935145_3936614	CP147907_2877280_2878749
group_355		hypothetical protein	98	313	Prophage	SopE_prophage			CP147896_4018910_4019539	CP147897_3932891_3933520	CP147907_2880374_2881003
group_363		Exonuclease	96	314	Prophage	SopE_prophage			CP147896_2852085_2852705	CP147897_3916850_3917470	CP147907_2895000_2895620
group_1869		transcriptional regulator;Helix-turn-helix domain-containing protein	90	315	Prophage	SopE_prophage			CP147896_2848191_2848481	CP147897_3921010_3921477	CP147907_2891106_2891396
group_1870		hypothetical protein;Bacteriophage protein	88	316	Prophage	SopE_prophage			CP147896_2850105_2850245	CP147897_3919629_3919835	CP147907_2893020_2893160
group_2068		hypothetical protein	86	317	none
group_1041	tnp	IS200/IS605 family IS200F transposase	79	323	tnp	tnp
group_869		hypothetical protein	64	344	Prophage	SopE_prophage			CP147896_2850532_2850756		CP147907_2893447_2893671
group_841		Rha family transcriptional regulator	63	345	Prophage	SopE_prophage			CP147896_2847745_2847981		CP147907_2890660_2890896
group_155		hypothetical protein	63	346	Prophage	SopE_prophage			CP147896_2848567_2849577		CP147907_2891482_2892492
group_527		hypothetical protein	62	347	Prophage	SopE_prophage			CP147896_2849558_2850013		CP147907_2892473_2892928
group_2080		G protein	54	349	none
group_2079		hypothetical protein;DNA-binding protein J	54	350	none
group_2077		Minor spike protein H (Modular protein);Minor spike protein;Arginyl-tRNA synthetase-Arginine--tRNA ligase	54	351	none
group_2076		Protein C	54	352	none
group_2075		Internal scaffolding protein B;hypothetical protein;Replication-associated protein A	54	353	none
group_2074		External scaffolding protein D	54	354	none
group_2072		hypothetical protein;G protein;Capsid protein F	54	355	Prophage_Annotation
group_1116		hypothetical protein	54	356	none
group_1784		hypothetical protein	48	358	none
group_850		DinI family protein	35	386	Prophage	SopE_prophage				CP147897_3927828_3928061	CP147907_2885833_2886066
eaf	eaf	Eaf protein	35	387	Prophage	SopE_prophage				CP147897_3924506_3924862	CP147907_2887830_2888186
group_474		Ead/Ea22-like family protein	35	390	Prophage	SopE_prophage				CP147897_3924862_3925365	CP147907_2887327_2887830
group_277		DUF551 domain-containing protein	35	391	Prophage	SopE_prophage				CP147897_3925362_3926105	CP147907_2886587_2887330
group_1073		DNA invertase-like protein	33	399	none
group_884		hypothetical protein	33	401	Prophage	SopE_prophage				CP147897_3922353_3922568
group_2071		phage tail protein	32	433	Prophage_Annotation
group_897		cell division inhibitor protein	32	435	Prophage	SopE_prophage				CP147897_3918597_3918803
group_662		DNA-binding protein	32	436	Prophage	SopE_prophage			CP147896_4012467_4012814	CP147897_3924162_3924509
group_441		HNHc domain-containing protein	32	437	Prophage	SopE_prophage				CP147897_3918796_3919332
dnaC	dnaC	DNA replication protein DnaC	32	438	Prophage	SopE_prophage			CP147896_4011707_4012456	CP147897_3923402_3924151
group_241		DUF1376 domain-containing protein	32	439	Prophage	SopE_prophage				CP147897_3922596_3923399
group_943		hypothetical protein	31	440	Prophage	SopE_prophage				CP147897_3926956_3927135
group_482		type II toxin-antitoxin system death-on-curing family toxin	31	441	Prophage	SopE_prophage				CP147897_3927146_3927643
group_1071		tail fiber assembly protein	30	443	Prophage_Annotation
group_1066		ApeA-NTD1 domain-containing protein	29	444	none
spiC	spiC	SPI-2 type III secretion system protein SpiC	28	445	none
group_2382	phrB	deoxyribodipyrimidine photo-lyase	27	446	none
group_2381	dtpD	Dipeptide permease D	27	447	none
group_2380	ybgI	radiation resistance protein YbgI	27	448	none
group_2379	pxpB	5-oxoprolinase subunit PxpB	27	449	none
group_2378		Biotin-dependent carboxyltransferase family protein	27	450	none
group_2377	pxpA	5-oxoprolinase subunit PxpA	27	451	none
group_1043	tnp	IS200/IS605 family IS200F transposase	26	482	tnp	tnp
group_863		Rha family transcriptional regulator	26	483	Prophage	SopE_prophage				CP147897_3921491_3921718
shdA	shdA	autotransporter-associated beta strand repeat-containing protein;hypothetical protein;AIDA autotransporter;Host colonisation factor;fibronectin-binding autotransporter adhesin ShdA;YapH protein;AIDA autotransporter-like protein;Fibronectin-binding autotransporter adhesin ShdA	25	489	none
group_1477		hypothetical protein;AIPR family protein;Abortive infection protein	25	490	none
group_159		hypothetical protein	25	491	Prophage	SopE_prophage				CP147897_3919864_3920862
group_1731		DinI family protein;DinI-like protein in retron Ec67	23	497	Prophage	FljB_prophage	CP147901_1134058_1134291
group_1796		hypothetical protein	21	502	none
group_1055		Lipoprotein	20	506	none
group_888		hypothetical protein	18	507	none								CP147899_1120587_1120799
group_666		hypothetical protein	18	508	none								CP147899_1120884_1121228
group_144		hypothetical protein	18	509	none								CP147899_1121280_1122311
group_1653	shdA;aidA	AIDA autotransporter-like protein;Autotransporter adhesin AidA;fibronectin-binding autotransporter adhesin ShdA	17	510	none
group_851		Magnesium chelatase	16	511	none
group_2073		hypothetical protein	15	512	none
group_944		hypothetical protein	15	513	none
tnpIS1	tnp-IS1	IS1 family transposase	14	514	tnp	tnp
group_2290		Phage-related tail fiber protein	12	515	Prophage_Annotation
group_2289	msgA	Virulence protein MsgA	12	516	none
group_2198		hypothetical protein	12	517	none
group_1875		Double-strand break reduction protein;DUF1187 domain-containing protein	12	518	none
group_1858		conjugal transfer protein TraG	12	519	none
group_1851		hypothetical protein;DNA helicase	12	520	none
group_1850		hypothetical protein	12	521	none
traI	traI	heavy metal resistance protein CzcA;Putative helicase	12	522	none
group_1838		RAQPRD family integrative conjugative element protein;Integrative conjugative element protein RAQPRD family	12	523	none
group_1837		Pilus assembly protein PilL	12	524	none
group_1835		integrating conjugative element protein	12	525	none
group_1834		TIGR03757 family integrating conjugative element protein	12	526	none
group_1831		ISNCY family transposase;Transposase-31 domain-containing protein	12	527	tnp	tnp
group_1830		TIGR03758 family integrating conjugative element protein	12	528	none
group_1829		restriction endonuclease	12	529	none
group_1828		Tat (Twin-arginine translocation) pathway signal sequence;Tat (twin-arginine translocation) pathway signal sequence	12	530	none
group_1823		TIGR03756 family integrating conjugative element protein	12	531	none
group_1822		hypothetical protein	12	532	none
group_1820		ead/Ea22-like family protein	12	533	none
ssb	ssb	single-stranded DNA-binding protein	12	534	none
group_1807		TIGR03745 family integrating conjugative element membrane protein;Putative membrane protein	12	535	none
group_1806		TIGR03746 family integrating conjugative element protein	12	536	none
group_1804		integrating conjugative element protein	12	537	none
group_1803		TIGR03759 family integrating conjugative element protein	12	538	none
group_1799		TIGR03752 family integrating conjugative element protein	12	539	none
group_1798		conjugative transfer ATPase	12	540	none
group_1779		hypothetical protein	12	541	Prophage	SopE_prophage_P88				CP147897_4097181_4097396
group_1777		hypothetical protein	12	542	none
group_1755		STY4528 family pathogenicity island replication protein	12	543	none
group_1754		hypothetical protein	12	544	none
group_1718		hypothetical protein	12	545	none
group_1715		hypothetical protein	12	546	none
group_1705		hypothetical protein	12	547	none
group_1700		DUF2786 domain-containing protein	12	548	none
group_1699		hypothetical protein	12	549	none
group_1692		TIGR03749 family integrating conjugative element protein	12	550	none
group_1691		TIGR03750 family conjugal transfer protein	12	551	none
group_1685		transglycosylase	12	552	none
group_1683		chromosome partitioning protein	12	553	none
group_1651		chromosome partitioning protein ParB;Chromosome partitioning protein ParB	12	554	none
group_1643		TIGR03751 family conjugal transfer lipoprotein	12	555	none
group_1637		TIGR03761 family integrating conjugative element protein	12	556	none
group_1636		hypothetical protein	12	557	none
group_1635		TIGR03747 family integrating conjugative element membrane protein	12	558	none
group_1408		hypothetical protein	12	559	none
group_528		DUF3577 domain-containing protein	12	560	none
group_393		DUF2857 domain-containing protein	12	561	none
dnaBPI	dnaB-PI	SPI-7-type island replicative DNA helicase	12	562	none
topB	topB	DNA topoisomerase III	12	563	none
traD	traD	type IV conjugative transfer system coupling protein TraD	12	564	none
group_2288		Acyloxyacyl hydrolase	11	565	none
group_1873		Voltage-gated potassium channel;ion transporter	11	566	none
group_1860		hypothetical protein	11	567	none
group_1852		Inverse autotransporter beta domain-containing protein;Ig-like domain-containing protein;invasin	11	568	none
group_1670		integrase;Site-specific DNA-methyltransferase (adenine-specific)	11	569	none
group_1327		MltA-interacting protein MipA	11	570	none
group_196		integrase	11	571	none
group_177		DUF1281 domain-containing protein	11	572	none
group_2291		Phage tail protein	10	574	none
sspH2	sspH2	SPI-2 type III secretion system effector E3 ubiquitin transferase SspH2	10	575	none
group_1861		hypothetical protein	10	577	none
group_1856		hypothetical protein	10	578	none
group_1824		hypothetical protein	10	579	none
group_1811		hypothetical protein	10	580	none
group_1726		acetyltransferase;hypothetical protein	10	581	none
group_1696		hypothetical protein	10	582	none
group_1686		recombinase XerD	10	583	none
group_1673		hypothetical protein	10	584	none
group_1645		hypothetical protein	10	585	none
group_870		hypothetical protein	10	586	none
group_703		hypothetical protein	10	587	none
group_2015		YffA;hypothetical protein;Plasmid protein	9	588	Plasmid								CP147900_25447_25638		40-60__1960__France__Human
group_1946		Adenine-specific methyltransferase;Uncharacterized protein YubJ;DNA methylase	9	589	Plasmid								CP147900_25028_25450		40-60__1960__France__Human
group_1865		hypothetical protein	9	590	none
group_1836		DUF4282 domain-containing protein	9	591	none
group_1669		DNA primase	9	592	none
spiA~~~sctC2	spiA;sctC2	SPI-2 type III secretion system protein SpiA;EscC/YscC/HrcC family type III secretion system outer membrane ring protein	9	593	none
group_1040	tnp	IS200/IS605 family IS200F transposase	9	594	tnp	tnp
group_1008		hypothetical protein	9	595	none
group_2174		Mobilization relaxase	8	596	Plasmid
psiB	psiB	conjugation system SOS inhibitor PsiB	8	597	Plasmid								CP147900_29298_29732		40-60__1960__France__Human
yubM	yubM	ParB/RepB/Spo0J family partition protein;Uncharacterized protein YubM;chromosome partitioning protein ParB	8	598	Plasmid								CP147900_27286_28575		40-60__1960__France__Human
yubL	yubL	DUF905 domain-containing protein;UPF0401 protein YubL	8	599	Plasmid								CP147900_26994_27227		40-60__1960__France__Human
group_1963	ssb	Single-stranded DNA-binding protein;single-stranded DNA-binding protein;Plasmid-derived single-stranded DNA-binding protein	8	600	Plasmid								CP147900_26409_26936		40-60__1960__France__Human
group_1954		DUF1380 domain-containing protein	8	601	Plasmid								CP147900_22889_23323		40-60__1960__France__Human
yubI	yubI	Putative antirestriction protein YubI;antirestriction protein	8	602	Plasmid								CP147900_24556_24981		40-60__1960__France__Human
yubE	yubE	Uncharacterized protein YubE;hypothetical protein	8	603	Plasmid								CP147900_22655_22876		40-60__1960__France__Human
yubD~~~yhdJ	yubD;yhdJ	DNA methylase;Putative methylase YubD	8	604	Plasmid								CP147900_21971_22654		40-60__1960__France__Human
group_1797		Stress responsive A/B Barrel Domain protein	8	605	none
group_1656		hypothetical protein	8	606	none
group_1322		ATP-dependent helicase	8	607	none
group_1181		hypothetical protein	8	608	none
group_640		Pathogenicity island 2 effector protein SseD	8	610	none
group_483		hypothetical protein	8	611	none
group_26		ATP-dependent endonuclease	8	612	none
group_2253	preT	NAD-dependent dihydropyrimidine dehydrogenase subunit PreT	7	613	none		CP147901_1710783_1712024		CP147896_1676641_1677882	CP147897_1675940_1677181		CP147895_1710603_1711844
group_2252	preA	NAD-dependent dihydropyrimidine dehydrogenase subunit PreA	7	614	none		CP147901_1709554_1710789		CP147896_1675412_1676647	CP147897_1674711_1675946		CP147895_1709374_1710609
group_2251	mglC	galactose/methyl galactoside ABC transporter permease MglC	7	615	none		CP147901_1708469_1709479		CP147896_1674327_1675337	CP147897_1673626_1674636		CP147895_1708289_1709299
group_2250	mglA	galactose/methyl galactoside ABC transporter ATP-binding protein MglA	7	616	none						CP147907_1674028_1675548		CP147899_1633998_1635518
group_2249	mglB	galactose/glucose ABC transporter substrate-binding protein MglB	7	617	none		CP147901_1705801_1706799		CP147896_1671659_1672657	CP147897_1670958_1671956		CP147895_1705621_1706619
group_2176		rep protein	7	618	none
cppB	cppB	cryptic plasmid protein B;Cryptic plasmid protein B	7	619	Plasmid
cppA	cppA	Cryptic plasmid protein A	7	620	Plasmid
group_2173		plasmid replicase;Plasmid replicase	7	621	Plasmid
group_2172		DUF5397 domain-containing protein	7	622	none
group_2171		Endoribonuclease VapD-like protein	7	623	none
yubG	yubG	Uncharacterized protein YubG;YchA	7	624	Plasmid								CP147900_23368_24138		40-60__1960__France__Human
group_1323	narH	Respiratory nitrate reductase 2 subunit beta;nitrate reductase subunit beta	7	625	none
group_1310		Outer membrane protein X	7	626	none
group_1046		Rha family transcriptional regulator	7	627	Prophage	FljB_prophage	CP147901_1139492_1139734
group_842		Cro/Cl family transcriptional regulator	7	628	none
group_674		hypothetical protein	7	629	none
group_596		transcriptional regulator	7	630	none
sctD	sctD	type III secretion system inner membrane ring subunit SctD	7	631	none
group_2175		Bacterial mobilisation protein (MobC)	6	632	Plasmid
tnpA	tnpA	IS200/IS605 family transposase	6	633	tnp	tnp
finO	finO	Fertility inhibition protein	6	634	Plasmid										40-60__1960__France__Human
group_980		hypothetical protein	6	636	none
group_2208		hypothetical protein	5	638	none
group_2082		Oxaloacetate decarboxylase alpha chain	5	639	none
group_2081		Phage tail fiber protein	5	640	Prophage_Annotation
group_2078		hypothetical protein	5	641	none
group_2066		conjugal transfer protein TrbE	5	642	Plasmid										40-60__1960__France__Human
trbC	trbC	type-F conjugative transfer system pilin assembly protein TrbC	5	643	Plasmid										40-60__1960__France__Human
trbI	trbI	type-F conjugative transfer system protein TrbI	5	644	Plasmid										40-60__1960__France__Human
traI~~~traX	traI;traX	conjugative transfer relaxase/helicase TraI;conjugal transfer pilus acetylase TraX	5	645	Plasmid										40-60__1960__France__Human
group_2061		type IV conjugative transfer system coupling protein TraD	5	646	Plasmid										40-60__1960__France__Human
parM	parM	stbA	5	647	Plasmid										40-60__1960__France__Human
group_2058	traB	Protein TraB	5	648	Plasmid										40-60__1960__France__Human
group_2057		Helix-turn-helix transcriptional regulator;hypothetical protein	5	649	Plasmid								CP147900_34831_35082
group_2053		Protein FlmC-like protein	5	650	Plasmid										40-60__1960__France__Human
yubP	yubP	UPF0380 protein YubP	5	651	Plasmid										40-60__1960__France__Human
yubO	yubO	Uncharacterized protein YubO	5	652	Plasmid										40-60__1960__France__Human
group_2033	trbB	type-F conjugative transfer system pilin assembly thiol-disulfide isomerase TrbB	5	653	Plasmid										40-60__1960__France__Human
yncB	yncB	Uncharacterized endonuclease	5	654	Plasmid										40-60__1960__France__Human
traT	traT	complement resistance protein TraT;TraT complement resistance protein	5	655	Plasmid										40-60__1960__France__Human
group_2026		X polypeptide	5	656	Plasmid										40-60__1960__France__Human
psiA	psiA	Protein PsiA	5	657	Plasmid										40-60__1960__France__Human
group_2013		conjugal transfer protein TraU	5	658	Plasmid										40-60__1960__France__Human
traN	traN	type-F conjugative transfer system mating-pair stabilization protein TraN	5	659	Plasmid										40-60__1960__France__Human
group_2012	tnp	IS1 family transposase	5	660	tnp	tnp
repA2	repA2	Replication regulatory protein repA2	5	661	Plasmid										40-60__1960__France__Human
traA	traA	type IV conjugative transfer system pilin TraA	5	662	Plasmid										40-60__1960__France__Human
traC	traC	type IV secretion system protein TraC	5	663	Plasmid										40-60__1960__France__Human
group_2002		nikA protein	5	664	Plasmid								CP147900_37366_37497
trbJ	trbJ	P-type conjugative transfer protein TrbJ	5	665	Plasmid										40-60__1960__France__Human
group_1992		YdaB	5	666	Plasmid										40-60__1960__France__Human
repA	repA	incFII family plasmid replication initiator RepA	5	667	Plasmid										40-60__1960__France__Human
traQ	traQ	type-F conjugative transfer system pilin chaperone TraQ	5	668	Plasmid										40-60__1960__France__Human
traK	traK	type-F conjugative transfer system secretin TraK	5	669	Plasmid										40-60__1960__France__Human
group_1981		hydrolase	5	670	Plasmid										40-60__1960__France__Human
traE	traE	type IV conjugative transfer system protein TraE	5	671	Plasmid										40-60__1960__France__Human
group_1969		DUF2726 domain-containing protein	5	672	Plasmid										40-60__1960__France__Human
traH	traH	Protein TraH	5	673	Plasmid										40-60__1960__France__Human
traM	traM	Relaxosome protein TraM	5	674	Plasmid										40-60__1960__France__Human
group_1962	stbB	protein stbB;Protein StbB	5	675	Plasmid										40-60__1960__France__Human
traL	traL	type IV conjugative transfer system protein TraL	5	676	Plasmid										40-60__1960__France__Human
group_1955	traI	conjugative transfer relaxase/helicase TraI	5	677	Plasmid										40-60__1960__France__Human
traV	traV	type IV conjugative transfer system lipoprotein TraV	5	678	Plasmid										40-60__1960__France__Human
traF	traF	type-F conjugative transfer system pilin assembly protein TraF	5	679	Plasmid										40-60__1960__France__Human
group_1951	rsmA	SAM-dependent methyltransferase	5	680	Plasmid										40-60__1960__France__Human
traG	traG	conjugal transfer mating pair stabilization protein TraG	5	681	Plasmid										40-60__1960__France__Human
traP	traP	conjugal transfer protein TraP;Protein TraP	5	682	Plasmid										40-60__1960__France__Human
traW	traW	type-F conjugative transfer system protein TraW	5	683	Plasmid										40-60__1960__France__Human
group_1872		hypothetical protein;Heme exporter protein D	5	684	none
group_1786		TetR/AcrR family transcriptional regulator;hypothetical protein	5	685	none
tnpISSen1~~~tnp	tnp-ISSen1;tnp	IS3 family ISSen1 transposase;IS3 family transposase	5	686	tnp	tnp
group_687		hypothetical protein	5	687	none
group_641		hypothetical protein	5	688	none
group_611		TonB-dependent receptor YncD	5	689	none
group_497		DNA ligase	5	690	none
group_2383		IS6-like element IS26 family transposase	4	691	tnp	tnp
group_2309		Mce protein	4	692	none
group_2308		hypothetical protein	4	693	none
group_2282	yehR	DUF1307 domain-containing protein	4	695	none
group_2281	yehR	DUF1307 domain-containing protein	4	696	none
group_2280	yehS	DUF1456 domain-containing protein	4	697	none
group_2279	btsR	two-component system response regulator BtsR	4	698	none
group_2278	lytS	sensor histidine kinase	4	699	none
group_2277	mlrA	HTH-type transcriptional regulator MlrA	4	700	none
group_2276	yohO	protein YohO	4	701	none
group_2275	opuBA	ABC-type proline/glycine betaine transport system ATPase component	4	702	none
group_2274	opuBB	ABC-type proline/glycine betaine transport system permease component	4	703	none
group_2273	osmF	Periplasmic glycine betaine/choline-binding (lipo)protein of an ABC-type transport system (osmoprotectant binding protein)	4	704	none
group_2272	bglX	beta-glucosidase BglX	4	705	none
group_2271	dld	D-lactate dehydrogenase	4	706	none
group_2270	pbpG	D-alanyl-D-alanine endopeptidase	4	707	none
group_2269		Yip1 domain-containing protein	4	708	none
group_2268	dedA	Membrane integrity protein DedA putative transporter DedA/Tvp38 family	4	709	none
group_2267		SDR family oxidoreductase	4	710	none
group_2266	mdtQ	multidrug resistance outer membrane protein MdtQ	4	711	none
group_2265	dusC	tRNA dihydrouridine(16) synthase DusC	4	712	none
group_2264	ubiH	3-hydroxybenzoate 6-monooxygenase	4	713	none		CP147901_1720453_1721646		CP147896_1686311_1687504	CP147897_1685610_1686803		CP147895_1720273_1721466
group_2263	maiA	maleylacetoacetate isomerase	4	714	none		CP147901_1719794_1720438		CP147896_1685652_1686296	CP147897_1684951_1685595		CP147895_1719614_1720258
group_2262	ycgM	2-keto-4-pentenoate hydratase/2-oxohepta-3-ene-17-dioic acid hydratase (catechol pathway)	4	715	none		CP147901_1719084_1719785		CP147896_1684942_1685643	CP147897_1684241_1684942		CP147895_1718904_1719605
group_2261	gtdA	gentisate 12-dioxygenase	4	716	none		CP147901_1718031_1719068		CP147896_1683889_1684926	CP147897_1683188_1684225		CP147895_1717851_1718888
group_2260	uhpC	Sugar phosphate permease	4	717	none		CP147901_1716661_1718019		CP147896_1682519_1683877	CP147897_1681818_1683176		CP147895_1716481_1717839
group_2259	lysR	DNA-binding transcriptional regulator LysR family	4	718	none		CP147901_1715627_1716535		CP147896_1681485_1682393	CP147897_1680784_1681692		CP147895_1715447_1716355
group_2258	yohJ	UPF0299 membrane protein YohJ	4	719	none		CP147901_1715097_1715495		CP147896_1680955_1681353	CP147897_1680254_1680652		CP147895_1714917_1715315
group_2257	lrgB	CidB/LrgB family autolysis modulator	4	720	none		CP147901_1714405_1715100		CP147896_1680263_1680958	CP147897_1679562_1680257		CP147895_1714225_1714920
group_2256	cdd	cytidine deaminase	4	721	none		CP147901_1713367_1714251		CP147896_1679225_1680109	CP147897_1678524_1679408		CP147895_1713187_1714071
group_2255	sanA	outer membrane permeability protein SanA	4	722	none		CP147901_1712471_1713190		CP147896_1678329_1679048	CP147897_1677628_1678347		CP147895_1712291_1713010
group_2254	yeiS	Protein yeiS	4	723	none		CP147901_1712229_1712468		CP147896_1678087_1678326	CP147897_1677386_1677625		CP147895_1712049_1712288
group_2189	rfaB	Glycosyltransferase involved in cell wall bisynthesis	4	724	none
group_2060		conjugal transfer protein TrbD	4	725	Plasmid										40-60__1960__France__Human
pemK	pemK	Endoribonuclease PemK	4	726	Plasmid										40-60__1960__France__Human
pemI	pemI	type II toxin-antitoxin system antitoxin PemI	4	727	Plasmid										40-60__1960__France__Human
group_2019		Uncharacterized protein	4	728	Plasmid										40-60__1960__France__Human
traS	traS	conjugal transfer entry exclusion protein TraS	4	729	Plasmid										40-60__1960__France__Human
group_2004	traY	conjugal transfer relaxosome protein TraY	4	730	Plasmid										40-60__1960__France__Human
tnpIS1X2~~~tnp	tnp-IS1X2;tnp	IS1 family IS1X2 transposase;IS1 family IS1B transposase ORF A	4	731	tnp	tnp
group_1998		hypothetical protein	4	732	Plasmid										40-60__1960__France__Human
group_1989		hypothetical protein	4	733	Plasmid										40-60__1960__France__Human
group_1980		hypothetical protein	4	734	Plasmid										40-60__1960__France__Human
trbA	trbA	conjugal transfer protein TrbA	4	735	Plasmid										40-60__1960__France__Human
group_1972		post-segregation killing PndC domain protein	4	736	Plasmid								CP147900_32732_33166
group_1966		YcdA	4	737	Plasmid										40-60__1960__France__Human
group_1949	traJ	Protein TraJ	4	738	Plasmid										40-60__1960__France__Human
group_1948		DUF262 domain-containing protein	4	739	Plasmid										40-60__1960__France__Human
group_1941		Uncharacterized protein	4	740	Plasmid										40-60__1960__France__Human
group_1853		hypothetical protein	4	742	Prophage	FljB_prophage	CP147901_1133064_1133675
group_1825		phage tail protein;tail fiber assembly protein;Tail fiber assembly protein	4	743	Prophage	FljB_prophage	CP147901_1183832_1184425
group_1801		tail fiber assembly protein	4	745	Prophage	FljB_prophage	CP147901_1184397_1184837
group_1800		hypothetical protein	4	746	none
group_1652		hypothetical protein	4	748	none
group_1100	galU	UTP--glucose-1-phosphate uridylyltransferase GalU	4	750	none
group_1044	tnp	IS200/IS605 family IS200F transposase	4	751	tnp	tnp
group_2354	uraA	Xanthine/uracil permease	3	755	none
group_2353		Aryl sulfotransferase	3	756	none
group_2352	lacI	Transcriptional regulator LacI family	3	757	none
group_2351	eptB	kdo(2)-lipid A phosphoethanolamine 7''-transferase	3	758	none
group_2350	lpfE	<C761	3	759	none
group_2349	lpfD	long polar fimbrial protein LpfD	3	760	none
group_2348	lpfC	long polar fimbrial usher protein LpfC	3	761	none
group_2347	lpfB	long polar fimbrial chaperone protein LpfB	3	762	none
group_2346	lpfA	long polar fimbria major subunit LpfA	3	763	none
secE2	secE2	calcium dodecin	3	764	none
group_2284	apbC	iron-sulfur cluster carrier protein ApbC	3	765	none
group_2283	metG	methionine--tRNA ligase	3	766	none
group_2207		hypothetical protein	3	767	none
group_2192	envF	putative lipoprotein EnvF	3	768	none
group_2191		Galactosyl transferase	3	769	none
group_2190		DUF2303 domain-containing protein	3	770	none
group_2182		Large repetitive protein	3	771	none
tnpIS66~~~tnpISCro1	tnp-IS66;tnp-ISCro1	IS66 family transposase;IS66 family ISCro1 transposase	3	772	tnp	tnp
group_2170	tnpA	IS66-like element accessory protein TnpA	3	773	tnp	tnp
group_2169	tnpB	IS66 family insertion sequence element accessory protein TnpB	3	774	tnp	tnp
group_2160		TraG-D-C domain-containing protein	3	775	Plasmid
group_2159		Chromosome partition protein Smc	3	776	Plasmid
group_2158		hypothetical protein	3	777	Plasmid
group_2157		transcriptional regulator	3	778	Plasmid
group_2156		hypothetical protein	3	779	Plasmid
group_2155		hypothetical protein	3	780	Plasmid
group_2154		Ankyrin repeats (3 copies)	3	781	Plasmid
group_2153		ParA family protein	3	782	Plasmid
group_2152		hypothetical protein	3	783	Plasmid
group_2151		hypothetical protein	3	784	Plasmid
group_2150		Ankryin	3	785	Plasmid
group_2149		hypothetical protein	3	786	Plasmid
group_2148		hypothetical protein	3	787	Plasmid
group_2147		hypothetical protein	3	788	Plasmid
group_2146		hypothetical protein	3	789	Plasmid
group_2145		hypothetical protein	3	790	Plasmid
group_2144		hypothetical protein	3	791	Plasmid
group_2143		hypothetical protein	3	792	Plasmid
group_2142		hypothetical protein	3	793	Plasmid
group_2141		hypothetical protein	3	794	Plasmid
group_2140		hypothetical protein	3	795	Plasmid
group_2139		hypothetical protein	3	796	Plasmid
group_2138		hypothetical protein	3	797	Plasmid
group_2137		hypothetical protein	3	798	Plasmid
group_2136		hypothetical protein	3	799	Plasmid
group_2135		hypothetical protein	3	800	Plasmid
group_2134		Site-specific DNA-methyltransferase (adenine-specific)	3	801	Plasmid
group_2133	res	type III restriction-modification system endonuclease	3	802	Plasmid
group_2132		Ankryin	3	803	Plasmid
group_2131		hypothetical protein	3	804	Plasmid
group_2130		hypothetical protein	3	805	Plasmid
group_2129		hypothetical protein	3	806	Plasmid
group_2128		hypothetical protein	3	807	Plasmid
group_2127		hypothetical protein	3	808	Plasmid
group_2126		addiction module toxin RelE	3	809	Plasmid
group_2125		DNA-binding protein	3	810	Plasmid
group_2124		hypothetical protein	3	811	Plasmid
group_2123		hypothetical protein	3	812	Plasmid
group_2122		hypothetical protein	3	813	Plasmid
group_2121		hypothetical protein	3	814	Plasmid
group_2120		hypothetical protein	3	815	Plasmid
group_2119		hypothetical protein	3	816	Plasmid
group_2118		Site-specific DNA-methyltransferase (adenine-specific)	3	817	Plasmid
group_2117		AAA-5 domain-containing protein	3	818	Plasmid
group_2116		hypothetical protein	3	819	Plasmid
group_2115		bundlin family protein	3	820	Plasmid
group_2114		hypothetical protein	3	821	Plasmid
group_2113		hypothetical protein	3	822	Plasmid
group_2112		PilS domain-containing protein	3	823	Plasmid
group_2111		LPD7 domain-containing protein	3	824	Plasmid
group_2110		hypothetical protein	3	825	Plasmid
group_2109		prepilin-type cleavage/methylation domain-containing protein	3	826	Plasmid
group_2108		hypothetical protein	3	827	Plasmid
group_2099		hypothetical protein	3	828	Plasmid								CP147900_46516_46692
group_2087		PndA	3	829	Plasmid								CP147900_45341_45592
group_2083		hypothetical protein	3	830	none
group_2070		phage tail protein	3	831	Prophage_Annotation
group_2059		hypothetical protein;YdgA	3	832	Plasmid								CP147900_34594_34800
group_2056		DinI family protein	3	833	Plasmid								CP147900_20019_20267
group_2041		hypothetical protein	3	834	Plasmid										40-60__1960__France__Human
group_2028		pilus assembly protein	3	835	Plasmid								CP147900_87520_87774
group_2017		molybdopterin-guanine dinucleotide biosynthesis protein MobC	3	836	Plasmid								CP147900_36596_36931
group_2009		DUF1281 domain-containing protein	3	837	Plasmid								CP147900_20661_21587
group_2003		methyltransferase	3	838	Plasmid								CP147900_35662_36510
group_2001		plasmid SOS inhibition protein A	3	839	Plasmid								CP147900_29729_30448
group_1995		antirestriction protein	3	840	Plasmid								CP147900_31504_32004
group_1994		YgdA	3	841	Plasmid								CP147900_33260_33526
impB	impB	Protein ImpB;UmuC domain-containing protein	3	842	Plasmid								CP147900_18314_19585
intI1	intI1	class 1 integron integrase IntI1	3	843	none
group_1975		hypothetical protein	3	844	Plasmid										40-60__1960__France__Human
group_1974		Protein YgaA;hypothetical protein	3	845	Plasmid								CP147900_30445_31041
impA	impA	Protein ImpA	3	846	Plasmid								CP147900_19585_20022
group_1956		conjugal transfer protein TraA	3	847	Plasmid								CP147900_89857_90144
nikB	nikB	Relaxase NikB;IncI1-type relaxase NikB	3	848	Plasmid								CP147900_37508_40207
group_1944		Conjugative transfer protein;Protein YafA	3	849	Plasmid										40-60__1960__France__Human
group_1943		transposase;Rpn family recombination-promoting nuclease/putative transposase	3	850	tnp	tnp
group_1848		hypothetical protein	3	851	none
group_1733		hypothetical protein	3	854	none
group_1524		putative aromatic acid decarboxylase;3-octaprenyl-4-hydroxybenzoate carboxy-lyase	3	856	none
rssB	rssB	two-component system response regulator RssB;Response regulator of RpoS	3	857	none
group_1442		hypothetical protein;Tailspike protein;PhageP22-tail domain-containing protein	3	858	Prophage	prophage_not_in_circular_genomes									18-88__1988__Chile__Human
group_1123		acetyltransferase	3	860	none
group_1042	tnp	IS200/IS605 family IS200F transposase	3	862	tnp	tnp
group_1007		hypothetical protein	3	863	Prophage	prophage_not_in_circular_genomes									18-88__1988__Chile__Human
group_1004		hypothetical protein	3	864	Prophage	prophage_not_in_circular_genomes									18-88__1988__Chile__Human
group_984		hypothetical protein	3	866	Prophage	prophage_not_in_circular_genomes									18-88__1988__Chile__Human
group_981		hypothetical protein	3	867	none						CP147907_1449964_1450119
group_972		Arc family DNA-binding protein	3	868	Prophage	SopE_prophage					CP147907_2864589_2864750
group_962		SEC-C metal-binding domain-containing protein	3	869	Prophage	prophage_not_in_circular_genomes									18-88__1988__Chile__Human
group_959		hypothetical protein	3	870	Prophage	FljB_prophage	CP147901_1193383_1193556
group_946		hypothetical protein	3	872	Prophage	prophage_not_in_circular_genomes									18-88__1988__Chile__Human
group_916		hypothetical protein	3	874	Prophage	prophage_not_in_circular_genomes									18-88__1988__Chile__Human
group_904		hypothetical protein	3	875	Prophage	prophage_not_in_circular_genomes									18-88__1988__Chile__Human
group_898		hypothetical protein	3	877	Prophage	prophage_not_in_circular_genomes									18-88__1988__Chile__Human
group_852		hypothetical protein	3	878	Prophage	prophage_not_in_circular_genomes									18-88__1988__Chile__Human
group_819		transcriptional regulator	3	879	Prophage	prophage_not_in_circular_genomes									18-88__1988__Chile__Human
group_811		hypothetical protein	3	880	Prophage	prophage_not_in_circular_genomes									18-88__1988__Chile__Human
group_807		bactoprenol glucosyl transferase	3	881	none						CP147907_1452175_1452429
group_794		hypothetical protein	3	882	Prophage	prophage_not_in_circular_genomes									18-88__1988__Chile__Human
group_772		transposase	3	884	tnp	tnp
group_732		Phage protein	3	885	Prophage	prophage_not_in_circular_genomes									18-88__1988__Chile__Human
group_731		PerC family transcriptional regulator	3	886	Prophage	prophage_not_in_circular_genomes									18-88__1988__Chile__Human
group_727		hypothetical protein	3	887	Prophage	prophage_not_in_circular_genomes									18-88__1988__Chile__Human
group_719		phage holin family protein	3	888	Prophage	prophage_not_in_circular_genomes									18-88__1988__Chile__Human
group_716		GtrA family protein	3	889	none						CP147907_1452398_1452709
group_705		Arc family DNA-binding protein	3	890	Prophage	SopE_prophage					CP147907_2864869_2865186
group_699		hypothetical protein	3	891	Prophage	prophage_not_in_circular_genomes									18-88__1988__Chile__Human
group_667		DUF1064 domain-containing protein	3	892	Prophage	prophage_not_in_circular_genomes									18-88__1988__Chile__Human
group_619		hypothetical protein	3	893	Prophage	prophage_not_in_circular_genomes									18-88__1988__Chile__Human
group_610		hypothetical protein	3	894	none
group_597		Putative phage holin	3	895	Prophage	prophage_not_in_circular_genomes									18-88__1988__Chile__Human
group_566		hypothetical protein	3	896	Prophage	prophage_not_in_circular_genomes									18-88__1988__Chile__Human
group_550		hypothetical protein	3	897	Prophage	prophage_not_in_circular_genomes									18-88__1988__Chile__Human
group_516		Acetyltransferase	3	898	Prophage	prophage_not_in_circular_genomes									18-88__1988__Chile__Human
group_490		DUF2514 domain-containing protein	3	899	Prophage	prophage_not_in_circular_genomes									18-88__1988__Chile__Human
group_476		Eae protein	3	900	Prophage	SopE_prophage					CP147907_2888183_2888686
group_475		hypothetical protein	3	901	Prophage	prophage_not_in_circular_genomes									18-88__1988__Chile__Human
group_431		hypothetical protein	3	902	Prophage	prophage_not_in_circular_genomes									18-88__1988__Chile__Human
group_427		protease	3	903	Prophage	prophage_not_in_circular_genomes									18-88__1988__Chile__Human
group_410		BRO family N-terminal domain-containing protein	3	905	Prophage	SopE_prophage					CP147907_2863956_2864516
group_379		putative terminase small subunit	3	906	Prophage	prophage_not_in_circular_genomes									18-88__1988__Chile__Human
group_377		XRE family transcriptional regulator	3	907	Prophage	prophage_not_in_circular_genomes									18-88__1988__Chile__Human
group_373		hypothetical protein	3	908	Prophage	prophage_not_in_circular_genomes									18-88__1988__Chile__Human
group_367		hypothetical protein	3	909	none
group_360		endolysin	3	910	Prophage	prophage_not_in_circular_genomes									18-88__1988__Chile__Human
group_340		adenine methylase	3	912	Prophage	prophage_not_in_circular_genomes									18-88__1988__Chile__Human
group_305		DUF4145 domain-containing protein	3	914	Prophage	FljB_prophage	CP147901_1132076_1132774
group_298		peptidase	3	915	Prophage	prophage_not_in_circular_genomes									18-88__1988__Chile__Human
group_276		Hypothetical phage protein	3	917	Prophage	SopE_prophage					CP147907_2863138_2863884
group_257		reverse transcriptase	3	918	Prophage	FljB_prophage	CP147901_1193525_1194298
group_248		Pyocin large subunit	3	919	Prophage	prophage_not_in_circular_genomes									18-88__1988__Chile__Human
group_234		exodeoxyribonuclease VIII	3	920	Prophage	prophage_not_in_circular_genomes									18-88__1988__Chile__Human
group_207		recombinase RecT	3	921	Prophage	prophage_not_in_circular_genomes									18-88__1988__Chile__Human
group_168		Phage capsid family	3	922	Prophage	prophage_not_in_circular_genomes									18-88__1988__Chile__Human
group_166		hypothetical protein	3	923	Prophage	prophage_not_in_circular_genomes									18-88__1988__Chile__Human
group_164		DUF551 domain-containing protein	3	924	Prophage	prophage_not_in_circular_genomes									18-88__1988__Chile__Human
group_163		hypothetical protein	3	925	Prophage	prophage_not_in_circular_genomes									18-88__1988__Chile__Human
group_102		Acetolactate synthase isozyme 1 large subunit	3	928	none
group_89		integrase	3	929	Prophage	prophage_not_in_circular_genomes									18-88__1988__Chile__Human
group_54		terminase	3	930	Prophage	prophage_not_in_circular_genomes									18-88__1988__Chile__Human
group_43		hypothetical protein	3	931	Prophage	prophage_not_in_circular_genomes									18-88__1988__Chile__Human
group_34		Portal protein	3	932	Prophage	prophage_not_in_circular_genomes									18-88__1988__Chile__Human
group_24		acyltransferase	3	933	none						CP147907_1450236_1452158
group_23		Acyltransferase	3	934	Prophage	prophage_not_in_circular_genomes									18-88__1988__Chile__Human
group_11		hypothetical protein	3	935	Prophage	prophage_not_in_circular_genomes									18-88__1988__Chile__Human
group_10		Phage capsid and scaffold	3	936	Prophage	prophage_not_in_circular_genomes									18-88__1988__Chile__Human
group_7		hypothetical protein	3	937	Prophage	prophage_not_in_circular_genomes									18-88__1988__Chile__Human
group_2386		IS6 family transposase;IS6-like element IS6100 family transposase	2	938	tnp	tnp
group_2374	pdeH	cyclic-guanylate-specific phosphodiesterase	2	939	none
group_2373	rbsK	Sugar or nucleoside kinase ribokinase family	2	940	none
group_2372	yhjJ	Protein YhjJ	2	941	none
dctC	dctC	C4-dicarboxylate transporter DctC	2	942	none
group_2371	hmsP	biofilm formation regulator HmsP	2	943	none
group_2370	bcsC	cellulose synthase complex outer membrane protein BcsC	2	944	none
group_2369		tetratricopeptide repeat protein	2	945	none
group_2368	bcsZ	cellulose synthase complex periplasmic endoglucanase BcsZ	2	946	none
group_2367	bcsB	cellulose biosynthesis cyclic di-GMP-binding regulatory protein BcsB	2	947	none
group_2366	bcsA	UDP-forming cellulose synthase catalytic subunit	2	948	none
group_2365	bcsQ	cellulose biosynthesis protein BcsQ	2	949	none
group_2364	bcsR	cellulose biosynthesis protein BcsR	2	950	none
group_2363	bcsE	cellulose biosynthesis c-di-GMP-binding protein BcsE	2	951	none
group_2362	bcsF	cellulose biosynthesis protein BcsF	2	952	none
group_2361	bcsG	cellulose biosynthesis protein BcsG	2	953	none
group_2360	ldrD	Small toxic polypeptide ldrD (Modular protein)	2	954	none
group_2359	sdaC	Amino acid permease	2	955	none
group_2358	dppF	dipeptide ABC transporter ATP-binding subunit DppF	2	956	none
group_2357	dppD	dipeptide ABC transporter ATP-binding protein	2	957	none
group_2356	dppC	dipeptide ABC transporter permease DppC	2	958	none
group_2355	dppB	dipeptide ABC transporter permease DppB	2	959	none
dppA	dppA	Dipeptide-binding protein	2	960	none
group_2314		hypothetical protein	2	961	none
group_2313		hypothetical protein	2	962	none
group_2312		hypothetical protein	2	963	none
group_2311		FAD-binding protein	2	964	none
group_2310		hypothetical protein	2	965	none
group_2217		Oxaloacetate decarboxylase alpha chain	2	966	none
group_2216		Cupin domain protein	2	967	none
group_2214		pyruvate carboxylase subunit B	2	968	none
group_2213		hypothetical protein	2	969	none
group_2212		hypothetical protein	2	970	Plasmid								CP147900_12117_12452
group_2211	oadA	sodium-extruding oxaloacetate decarboxylase subunit alpha	2	971	none
group_2210		hypothetical protein	2	972	none
group_2196		LysR family transcriptional regulator YneJ	2	974	none
rtcA	rtcA	RNA 3'-terminal phosphate cyclase	2	975	none
group_2195		VWA domain-containing protein;TROVE domain-containing protein	2	976	none
group_2194	rtcB	RNA-splicing ligase RtcB	2	977	none
group_2193		hypothetical protein	2	978	none
group_2188		DNA-directed RNA polymerase subunit beta	2	979	none
group_2187		MbeD family mobilization/exclusion protein	2	980	none
group_2186		hypothetical protein	2	981	none
group_2185		IS1 family transposase	2	982	tnp	tnp
group_2184		hypothetical protein	2	983	none
group_2183		Phage terminase endonuclease small subunit M	2	984	Prophage_Annotation
group_2181		Helix-turn-helix domain-containing protein	2	985	none
group_2180		HTH cro/C1-type domain-containing protein	2	986	none
group_2179		hypothetical protein	2	987	none
group_2178		pyruvate carboxylase subunit B	2	988	none
group_2177		hypothetical protein	2	989	none
group_2167		hypothetical protein	2	990	Prophage						CP147907_1902440_1902973
group_2107		sodium ion-translocating decarboxylase subunit beta	2	991	none
group_2106		hypothetical protein	2	992	Plasmid								CP147900_74181_74315
group_2105		conjugal transfer protein	2	993	Plasmid								CP147900_66378_66668
group_2104	traP	IncI1-type conjugal transfer protein TraP	2	994	Plasmid								CP147900_57911_58615
group_2103	traS	putative conjugal transfer protein TraS	2	995	Plasmid								CP147900_56677_56865
traX	traX	IncI1-type conjugal transfer protein TraX	2	996	Plasmid								CP147900_50363_50947
group_2102		HEAT repeat domain-containing protein	2	997	Plasmid								CP147900_47084_47293
rci	rci	Shufflon-specific DNA recombinase	2	998	Plasmid								CP147900_72385_73539
group_2101		Conjugal transfer protein TraY	2	999	Plasmid								CP147900_48098_50266
group_2100		histidine phosphatase family protein	2	1000	Plasmid								CP147900_69478_70062
traR	traR	IncI1-type conjugal transfer protein TraR	2	1001	Plasmid								CP147900_56929_57333
excA	excA	plasmid IncI1-type surface exclusion protein ExcA	2	1002	Plasmid								CP147900_47365_48027
group_2098		conjugal transfer protein TraM	2	1003	Plasmid								CP147900_60901_61593
group_2097	traN	IncI1-type conjugal transfer protein TraN	2	1004	Plasmid								CP147900_59907_60890
group_2096	traH	IncI1-type conjugal transfer lipoprotein TraH	2	1005	Plasmid								CP147900_68625_69083
group_2095	traV	IncI1-type conjugal transfer protein TraV	2	1006	Plasmid								CP147900_52145_52759
group_2094	traI	IncI1-type conjugal transfer lipoprotein TraI	2	1007	Plasmid								CP147900_67810_68628
group_2093	traT	IncI1-type conjugal transfer protein TraT	2	1008	Plasmid								CP147900_55893_56693
group_2092	traQ	TraQ	2	1009	Plasmid								CP147900_57384_57911
group_2091		phospholipase D family protein	2	1010	Plasmid								CP147900_65812_66363
group_2090		DNA primase	2	1011	Plasmid								CP147900_61955_65722
traU	traU	IncI1-type conjugal transfer protein TraU	2	1012	Plasmid								CP147900_52759_55803
traO	traO	conjugal transfer protein TraO	2	1013	Plasmid								CP147900_58615_59904
group_2089	traW	IncI1-type conjugal transfer protein TraW	2	1014	Plasmid								CP147900_50976_52178
group_2088		conjugal transfer protein TraF	2	1015	Plasmid								CP147900_70122_71324
group_2086		conjugal transfer protein TraE	2	1016	Plasmid								CP147900_71410_72234
group_2085		conjugal transfer protein	2	1017	Plasmid								CP147900_61590_61937
group_2084	traJ	plasmid transfer ATPase TraJ	2	1018	Plasmid								CP147900_66665_67813
group_2069		IS3 family transposase	2	1019	tnp	tnp
group_2065		transcription termination factor NusG	2	1020	Plasmid								CP147900_88882_89415
group_2054		PilN family type IVB pilus formation outer membrane protein	2	1021	Plasmid								CP147900_82827_84509
group_2050		Shufflon protein A'	2	1022	Plasmid								CP147900_75304_76596
pilP	pilP	type IV pilus biogenesis protein PilP	2	1023	Plasmid								CP147900_81100_81552
group_2044		pilus assembly protein PilO	2	1024	Plasmid								CP147900_81539_82834
group_2038		conjugal transfer protein TrbC	2	1025	Plasmid								CP147900_40244_42535
group_2036		pili assembly chaperone	2	1026	Plasmid								CP147900_86356_86949
group_2032	yhbS	putative N-acetyltransferase YhbS	2	1027	none
group_2030		YedA protein	2	1028	Plasmid
pilL	pilL	type IV pilus biogenesis lipoprotein PilL	2	1029	Plasmid								CP147900_84960_86027
trbB	trbB	IncI1-type conjugal transfer protein TrbB	2	1030	Plasmid								CP147900_42528_43598
group_2020		Replication initiation protein	2	1031	Plasmid								CP147900_1_1032
sul1	sul1	sulfonamide-resistant dihydropteroate synthase Sul1	2	1032	none
group_2014		prepilin peptidase	2	1033	Plasmid								CP147900_76596_77252
group_2011		PilJ protein	2	1034	Plasmid								CP147900_86999_87259
group_2010		pilus assembly protein PilR	2	1035	Plasmid								CP147900_78438_79523
group_2008		hypothetical protein	2	1036	Plasmid								CP147900_87263_87523
group_2000	trbA	IncI1-type conjugal transfer protein TrbA	2	1037	Plasmid								CP147900_43617_44825
resD	resD	Resolvase	2	1038	Plasmid
group_1996		lytic transglycosylase	2	1039	Plasmid								CP147900_77237_77797
group_1991		pilus assembly protein PilX	2	1040	Plasmid								CP147900_77807_78421
group_1988		hypothetical protein	2	1041	none
qacEdelta1	qacEdelta1	quaternary ammonium compound efflux SMR transporter QacE delta 1	2	1042	none
group_1979		ATP-binding protein	2	1043	Plasmid								CP147900_79536_81089
group_1959		pilus assembly protein PilP	2	1044	Plasmid								CP147900_84523_84960
dfrA14~~~dfrA5	dfrA14;dfrA5	trimethoprim-resistant dihydrofolate reductase DfrA14;trimethoprim-resistant dihydrofolate reductase DfrA5	2	1045	none
group_1953		conjugal transfer protein TraC	2	1046	Plasmid								CP147900_87946_88629
group_1947		hypothetical protein	2	1047	Plasmid								CP147900_73566_73691
group_1940		HTH-8 domain-containing protein	2	1048	Plasmid									P7704_1743_1940
qnrB19	qnrB19	quinolone resistance pentapeptide repeat protein QnrB19	2	1049	Plasmid									P7704_1005_1685
group_1868		DUF1391 domain-containing protein	2	1050	none
group_1849		hypothetical protein	2	1051	none
group_1843		hypothetical protein	2	1052	none
group_1826		Rtr1/RPAP2 family;RTR1-type domain-containing protein	2	1053	none
group_1813		Protein StbE;Addiction module toxin RelE	2	1054	none
group_1802		hypothetical protein	2	1055	none
racC	racC	Protein RacC	2	1056	none
group_1775		phage tail protein;Phage tail protein	2	1057	Prophage	FljB_prophage	CP147901_1183341_1183832
group_1739	purU	Formyltetrahydrofolate deformylase;formyltetrahydrofolate deformylase	2	1058	none
ydaV	ydaV	Uncharacterized protein YdaV	2	1059	none
group_1675		hypothetical protein	2	1060	none
group_1674		hypothetical protein	2	1061	none
recE	recE	Exodeoxyribonuclease 8;exodeoxyribonuclease VIII	2	1062	none
group_1400		hypothetical protein	2	1063	none
rssA	rssA	patatin-like phospholipase RssA	2	1064	none
group_1099	ychJ	YchJ family protein	2	1065	none
yhjG	yhjG	AsmA family protein YhjG	2	1066	none
group_1022		hypothetical protein	2	1067	none
group_966		hypothetical protein	2	1069	none
group_945		hypothetical protein	2	1070	none
group_843		hypothetical protein	2	1071	none
group_797		hypothetical protein	2	1073	Prophage	FljB_prophage	CP147901_1133724_1133984
group_711		hypothetical protein	2	1074	none
group_682		hypothetical protein	2	1075	none
ydaT	ydaT	Uncharacterized protein YdaT	2	1077	none
group_551		hypothetical protein	2	1078	none
group_442		hypothetical protein	2	1081	none
group_437		hypothetical protein	2	1082	none
group_356		phage repressor protein	2	1083	Prophage_Annotation
group_353		phage repressor protein	2	1084	Prophage	FljB_prophage	CP147901_1139854_1140486
group_245		Putative DNA-binding phage protein	2	1085	Prophage_Annotation
group_167		recombinase XerD	2	1086	none
group_146		hypothetical protein	2	1087	none
group_135		Recombinase RecT	2	1088	none
group_2385		hypothetical protein;DUF4288 domain-containing protein	1	1090	Prophage	SopE_prophage	CP147901_3993596_3993877		CP147896_4042017_4042298	CP147897_3956854_3957135		CP147895_4017050_4017331	CP147899_3962746_3963027
group_2384	secY	hypothetical protein;Preprotein translocase subunit SecY	1	1091	none
group_2376	hns	DNA-binding transcriptional regulator H-NS	1	1092	none
group_2375	tnp	IS200/IS605 family IS200F transposase	1	1093	tnp	tnp
group_2345		hypothetical protein	1	1094	none
group_2344		hypothetical protein	1	1095	none
group_2343		hypothetical protein	1	1096	none
group_2342		hypothetical protein	1	1097	none
group_2341		hypothetical protein	1	1098	none
group_2340		hypothetical protein	1	1099	Prophage	prophage_not_in_circular_genomes									493366__2018__UKOrElsewhere__Human
group_2339		LexA family transcriptional repressor	1	1100	Prophage	prophage_not_in_circular_genomes									493366__2018__UKOrElsewhere__Human
group_2338		DUF5448 domain-containing protein	1	1101	Prophage	prophage_not_in_circular_genomes									493366__2018__UKOrElsewhere__Human
group_2337		Single-stranded DNA-binding protein	1	1102	Prophage	prophage_not_in_circular_genomes									493366__2018__UKOrElsewhere__Human
group_2336		Eaa protein	1	1103	Prophage	prophage_not_in_circular_genomes									493366__2018__UKOrElsewhere__Human
group_2335		hypothetical protein	1	1104	Prophage	prophage_not_in_circular_genomes									493366__2018__UKOrElsewhere__Human
group_2334		Aromatic amino acid lyase	1	1105	Prophage	prophage_not_in_circular_genomes									493366__2018__UKOrElsewhere__Human
group_2333	abc2	Anti-RecBCD protein 2	1	1106	Prophage	prophage_not_in_circular_genomes									493366__2018__UKOrElsewhere__Human
group_2332		Arf protein	1	1107	Prophage	prophage_not_in_circular_genomes									493366__2018__UKOrElsewhere__Human
eag	eag	Eag protein	1	1108	Prophage	prophage_not_in_circular_genomes									493366__2018__UKOrElsewhere__Human
group_2331		hypothetical protein	1	1109	Prophage	prophage_not_in_circular_genomes									493366__2018__UKOrElsewhere__Human
group_2330		HNH endonuclease	1	1110	Prophage	prophage_not_in_circular_genomes									493366__2018__UKOrElsewhere__Human
group_2329		Uncharacterized protein	1	1111	Prophage	prophage_not_in_circular_genomes									493366__2018__UKOrElsewhere__Human
group_2328		recombinase	1	1112	Prophage	prophage_not_in_circular_genomes									493366__2018__UKOrElsewhere__Human
eac	eac	Eac protein	1	1113	Prophage	prophage_not_in_circular_genomes									493366__2018__UKOrElsewhere__Human
group_2327		Bacteriophage CII protein	1	1114	Prophage	prophage_not_in_circular_genomes									493366__2018__UKOrElsewhere__Human
group_2326		hypothetical protein	1	1115	Prophage	prophage_not_in_circular_genomes									493366__2018__UKOrElsewhere__Human
ral	ral	Restriction inhibitor protein ral	1	1116	Prophage	prophage_not_in_circular_genomes									493366__2018__UKOrElsewhere__Human
group_2325	dnaB	helicase DnaB	1	1117	Prophage	prophage_not_in_circular_genomes									493366__2018__UKOrElsewhere__Human
group_2324		XRE family transcriptional regulator	1	1118	Prophage	prophage_not_in_circular_genomes									493366__2018__UKOrElsewhere__Human
group_2323		protease FtsH-inhibitory lysogeny factor CIII	1	1119	Prophage	prophage_not_in_circular_genomes									493366__2018__UKOrElsewhere__Human
group_2322		Endonuclease	1	1120	Prophage	prophage_not_in_circular_genomes									493366__2018__UKOrElsewhere__Human
group_2321		hypothetical protein	1	1121	Prophage	prophage_not_in_circular_genomes									493366__2018__UKOrElsewhere__Human
group_2320		DUF5405 domain-containing protein	1	1122	Prophage	prophage_not_in_circular_genomes									493366__2018__UKOrElsewhere__Human
group_2319		putative regulatory protein N	1	1123	Prophage	prophage_not_in_circular_genomes									493366__2018__UKOrElsewhere__Human
group_2318		DUF4752 domain-containing protein	1	1124	Prophage	prophage_not_in_circular_genomes									493366__2018__UKOrElsewhere__Human
group_2317		DNA replication protein	1	1125	Prophage	prophage_not_in_circular_genomes									493366__2018__UKOrElsewhere__Human
group_2316		protein kil	1	1126	Prophage	prophage_not_in_circular_genomes									493366__2018__UKOrElsewhere__Human
group_2315		acyltransferase	1	1127	Prophage	prophage_not_in_circular_genomes									493366__2018__UKOrElsewhere__Human
group_2286		hypothetical protein	1	1128	none
group_2215		hypothetical protein	1	1129	none
group_2209	xerD	Site-specific recombinase XerD	1	1130	none
group_2206		CitB protein	1	1131	none
group_2204	xerD	integrase	1	1132	Prophage	FljB_prophage	CP147901_1140488_1141507
group_2203		phage repressor protein	1	1133	Prophage_Annotation
group_2202		hypothetical protein	1	1134	none
group_2201		hypothetical protein	1	1135	none
group_2200		chromosome partitioning protein ParA	1	1136	none
group_2199		Rha family transcriptional regulator	1	1137	none
group_2197	bisC	Anaerobic selenocysteine-containing dehydrogenase	1	1138	none
group_2166		hypothetical protein	1	1140	Prophage						CP147907_1902181_1902438
group_2165		DUF4224 domain-containing protein	1	1141	Prophage						CP147907_1900749_1900976
group_2164		3'-5' exoribonuclease	1	1142	Prophage						CP147907_1901016_1901585
group_2163		Molecular chaperone DnaJ	1	1143	Prophage						CP147907_1901589_1902170
group_2162		integrase	1	1144	Prophage						CP147907_1899758_1900612
group_2161		helix-turn-helix domain-containing protein	1	1145	Prophage						CP147907_1909219_1910037
group_2067		hypothetical protein	1	1146	none
group_2064	acrR	TetR/AcrR family transcriptional regulator	1	1147	none
group_2063		Retron-type reverse transcriptase	1	1148	Plasmid										27-68__1968__France__Human
group_2062		korC	1	1149	Plasmid								CP147900_11027_11311
cma	cma	lipid II-degrading bacteriocin colicin M	1	1150	none
group_2055		serine acetyltransferase	1	1151	Plasmid
group_2052		hypothetical protein	1	1152	Plasmid								CP147900_5626_6216
group_2051		type II toxin-antitoxin system mRNA interferase toxin RelE/StbE family	1	1153	Plasmid
group_2049		CDS7	1	1154	none
group_2048		hypothetical protein	1	1155	Plasmid
group_2047		plasmid segregation protein parM	1	1156	Plasmid								CP147900_16941_17912
group_2046		chromosome partitioning protein ParA	1	1157	Plasmid								CP147900_16068_16712
group_2045		antitoxin	1	1158	Plasmid
trbG	trbG	conjugal transfer protein TrbG	1	1159	Plasmid_Annotation
group_2043		ParA family protein	1	1160	Plasmid
group_2042		surface exclusion protein	1	1161	none
group_2040		hypothetical protein	1	1162	none
group_2039		korC	1	1163	Plasmid								CP147900_9065_9355
group_2037		hypothetical protein	1	1164	Plasmid								CP147900_11482_12129
group_2035		hypothetical protein	1	1165	Plasmid
group_2034		proQ/FINO family protein	1	1166	Plasmid
group_2031		CDS10	1	1167	none
group_2029		CDS8	1	1168	none
group_2027		OrfH	1	1169	none
group_2025		recombinase	1	1170	Plasmid
group_2024		AraC family transcriptional regulator	1	1171	Plasmid
group_2023		YdfA	1	1172	Plasmid								CP147900_6216_6473
mphA	mph(A)	Mph(A) family macrolide 2'-phosphotransferase	1	1173	none
group_2022		recombinase	1	1174	Plasmid
group_2021		hypothetical protein	1	1175	Plasmid
group_2018		ATP-binding protein	1	1176	none
group_2016		DUF6685 domain-containing protein	1	1177	Plasmid								CP147900_1942_2934
group_2007		hypothetical protein	1	1178	none
group_2006		hypothetical protein	1	1179	Plasmid										27-68__1968__France__Human
group_2005		Conserved uncharacterized protein	1	1180	Plasmid								CP147900_14203_14811
group_1999		hypothetical protein	1	1181	none
aadA1	aadA1	ANT(3'')-Ia family aminoglycoside nucleotidyltransferase AadA1	1	1182	none
aadA2	aadA2	ANT(3'')-Ia family aminoglycoside nucleotidyltransferase AadA2	1	1183	none
group_1997		DUF4238 domain-containing protein	1	1184	none
group_1993		IS6-like element IS26 family transposase	1	1185	tnp	tnp
group_1990		nucleotide-binding containing TIR-like domain protein	1	1186	Plasmid								CP147900_6802_7905
cba	cba	pore-forming bacteriocin colicin B	1	1187	none
group_1987		proQ/FINO family protein	1	1188	Plasmid								CP147900_2993_3610
group_1986		abortive infection protein	1	1189	none
group_1985		hypothetical protein	1	1190	Plasmid
group_1984		CDS11	1	1191	none
group_1983		porin OmpC	1	1192	Plasmid
group_1982		cobalamin biosynthesis protein CbiX	1	1193	none
dAP2	dAP2	Uncharacterized protein in traX-finO intergenic region	1	1194	none
putA1	putA1	YacA	1	1195	none
group_1978		chromosome segregation protein SMC	1	1196	Plasmid								CP147900_3805_5361
group_1977		Gifsy-1 prophage GlpA	1	1197	Plasmid
group_1976		DUF6404 domain-containing protein	1	1198	none
group_1973		hypothetical protein	1	1199	Plasmid								CP147900_9352_9549
group_1971		plasmid stability protein	1	1200	Plasmid								CP147900_17917_18309
group_1970		MFS transporter	1	1201	none
group_1968		hypothetical protein	1	1202	Plasmid								CP147900_13783_14133
group_1967		hypothetical protein	1	1203	Plasmid
group_1965		molecular chaperone GroEL	1	1204	Plasmid
group_1964		DUF4238 domain-containing protein	1	1205	Plasmid								CP147900_7935_9065
group_1961		CopG family transcriptional regulator	1	1206	Plasmid								CP147900_15799_16074
group_1960		YaeA	1	1207	Plasmid
group_1958		DUF3800 domain-containing protein	1	1208	Plasmid								CP147900_9874_11007
group_1957		conjugal transfer protein TrbD	1	1209	Plasmid_Annotation
cbi	cbi	colicin B immunity protein	1	1210	none
cmi	cmi	colicin M immunity protein	1	1211	none
group_1952	xerD	resolvase	1	1212	Plasmid								CP147900_14918_15661
cmlA1	cmlA1	chloramphenicol efflux MFS transporter CmlA1	1	1213	none
group_1950		hypothetical protein	1	1214	none
pndA	pndA	Protein PndA	1	1215	Plasmid								CP147900_45114_45269
traY	traY	conjugal transfer relaxosome protein TraY	1	1216	Plasmid_Annotation
group_1945		hypothetical protein	1	1217	Plasmid								CP147900_12632_13213
traJ	traJ	conjugal transfer transcriptional regulator TraJ	1	1218	Plasmid_Annotation
group_1942		type II toxin-antitoxin system mRNA interferase toxin RelE/StbE family	1	1219	none
group_1891	cspD	cold shock-like protein CspD	1	1220	none
group_1106	ppdD	prepilin peptidase-dependent pilin	1	1221	none
clpS	clpS	ATP-dependent Clp protease adapter ClpS	1	1222	none
tag	tag	DNA-3-methyladenine glycosylase I	1	1223	none
yhjY	yhjY	putative conserved protein YhjY contains autotransporter beta-barrel domain	1	1224	none
group_1030		Secreted protein	1	1225	none
melB	melB	Na+/melibiose symporter or related transporter	1	1226	none
yhjD	yhjD	inner membrane protein YhjD	1	1227	none
group_1029	lysR	DNA-binding transcriptional regulator LysR family	1	1228	none
group_1025		hypothetical protein	1	1229	Prophage	prophage_not_in_circular_genomes									493366__2018__UKOrElsewhere__Human
group_1021		hypothetical protein	1	1230	Prophage						CP147907_1937040_1937138
group_1020		Uncharacterized protein ORF25	1	1231	Prophage	prophage_not_in_circular_genomes									493366__2018__UKOrElsewhere__Human
group_1010		hypothetical protein	1	1232	none
group_1006		hypothetical protein	1	1233	none
group_1005		Uncharacterized protein gp20	1	1234	Prophage	prophage_not_in_circular_genomes									45-88__1988__France__Human
group_1001		hypothetical protein	1	1235	none
group_983		DUF3927 domain-containing protein	1	1236	Prophage	prophage_not_in_circular_genomes									CIP54_105__1953__Austria__Unknown
hokD	hokD	type I toxin-antitoxin system toxin HokD	1	1237	Prophage	prophage_not_in_circular_genomes									CIP54_105__1953__Austria__Unknown
group_979		hypothetical protein	1	1238	none
group_978		hypothetical protein	1	1239	none
group_973		hypothetical protein	1	1240	Prophage	prophage_not_in_circular_genomes									CIP54_105__1953__Austria__Unknown
group_970		hypothetical protein	1	1241	Prophage	prophage_not_in_circular_genomes									45-88__1988__France__Human
group_950		hypothetical protein	1	1242	none
group_947		NinZ	1	1243	Prophage	prophage_not_in_circular_genomes									493366__2018__UKOrElsewhere__Human
group_939		hypothetical protein	1	1244	none
group_938		Uncharacterized protein gp13	1	1245	Prophage	prophage_not_in_circular_genomes									45-88__1988__France__Human
group_933		hypothetical protein	1	1246	none
group_932		DUF1187 domain-containing protein	1	1247	Prophage	prophage_not_in_circular_genomes									CIP54_105__1953__Austria__Unknown
com	com	Cryptic Mu-phage protein com	1	1248	Prophage	prophage_not_in_circular_genomes									45-88__1988__France__Human
group_928		hypothetical protein	1	1249	none
group_927		hypothetical protein	1	1250	none
group_918		hypothetical protein	1	1251	none
group_917		Uncharacterized protein gp24	1	1252	Prophage	prophage_not_in_circular_genomes									45-88__1988__France__Human
ninH	ninH	Protein ninH	1	1254	Prophage	prophage_not_in_circular_genomes									493366__2018__UKOrElsewhere__Human
group_905		Bacteriophage holin family HP1	1	1255	Prophage	prophage_not_in_circular_genomes									493366__2018__UKOrElsewhere__Human
group_903		hypothetical protein	1	1256	none
group_901		hypothetical protein	1	1257	Prophage	prophage_not_in_circular_genomes									CIP54_105__1953__Austria__Unknown
group_899		Putative sheath terminator protein	1	1258	Prophage	prophage_not_in_circular_genomes									45-88__1988__France__Human
group_893		Uncharacterized protein in gp5-gp4 intergenic region	1	1259	Prophage	prophage_not_in_circular_genomes									493366__2018__UKOrElsewhere__Human
group_892		Membrane protein	1	1260	none
group_891		hypothetical protein	1	1261	none
group_889		hypothetical protein	1	1262	Prophage						CP147907_1938004_1938216
group_887		hypothetical protein	1	1263	none
xisR	xisR	excisionase XisR	1	1264	Prophage	prophage_not_in_circular_genomes									CIP54_105__1953__Austria__Unknown
group_882		sugar acetyltransferase inhibitor	1	1265	Prophage	prophage_not_in_circular_genomes									CIP54_105__1953__Austria__Unknown
group_881		Uncharacterized protein gp18	1	1266	Prophage	prophage_not_in_circular_genomes									45-88__1988__France__Human
group_876		hypothetical protein	1	1267	none
group_875		hypothetical protein	1	1268	none
kilR	kilR	killing protein KilR	1	1269	none
ninY	ninY	Putative protein ninY	1	1270	Prophage	prophage_not_in_circular_genomes									493366__2018__UKOrElsewhere__Human
group_871		hypothetical protein	1	1271	Prophage						CP147907_1905516_1905740
kil	kil	Protein kil	1	1272	Prophage	prophage_not_in_circular_genomes									45-88__1988__France__Human
group_859		dipicolinate synthase	1	1273	none
group_858		Uncharacterized protein gp6	1	1274	Prophage	prophage_not_in_circular_genomes									45-88__1988__France__Human
group_854		hypothetical protein	1	1275	none
group_853		hypothetical protein	1	1276	Prophage						CP147907_1937125_1937358
group_844		DUF1482 domain-containing protein	1	1277	Prophage	prophage_not_in_circular_genomes									CIP54_105__1953__Austria__Unknown
group_837		ABC-three component (ABC-3C) system Middle Component 8	1	1278	none
group_830		Uncharacterized protein in gp15-gp3 intergenic region	1	1279	Prophage	prophage_not_in_circular_genomes									493366__2018__UKOrElsewhere__Human
group_828		transcriptional regulator	1	1280	none
group_823		hypothetical protein	1	1281	none
group_820		Carbonic anhydrase	1	1282	none
group_812		hypothetical protein	1	1283	none
group_805		hypothetical protein	1	1284	Prophage	prophage_not_in_circular_genomes									493366__2018__UKOrElsewhere__Human
group_804		Sb50	1	1285	Prophage						CP147907_1914591_1914848
group_803		Metalloprotease yggG	1	1286	none
group_798		putative prophage protein	1	1287	Prophage	prophage_not_in_circular_genomes									493366__2018__UKOrElsewhere__Human
group_796		hypothetical protein	1	1288	none
group_795		ATP-binding cassette domain-containing protein	1	1289	none
group_783		hypothetical protein	1	1290	Prophage	prophage_not_in_circular_genomes									CIP54_105__1953__Austria__Unknown
group_782		hypothetical protein	1	1291	none
group_777		transcriptional regulator	1	1292	none
group_775		Ogr/Delta-like zinc finger	1	1293	none
group_774		hypothetical protein	1	1294	Prophage	prophage_not_in_circular_genomes									CIP54_105__1953__Austria__Unknown
group_767		holin	1	1296	Prophage	prophage_not_in_circular_genomes									CIP54_105__1953__Austria__Unknown
group_766		transcriptional regulator	1	1297	Prophage	prophage_not_in_circular_genomes									CIP54_105__1953__Austria__Unknown
group_765		hypothetical protein	1	1298	none
group_754		hypothetical protein	1	1299	none
xis	xis	excisionase Xis	1	1300	Prophage_Annotation
group_751		hypothetical protein	1	1301	Prophage	prophage_not_in_circular_genomes									CIP54_105__1953__Austria__Unknown
group_750		hypothetical protein	1	1302	Prophage	prophage_not_in_circular_genomes									CIP54_105__1953__Austria__Unknown
group_748		Uncharacterized protein gp9	1	1304	Prophage	prophage_not_in_circular_genomes									45-88__1988__France__Human
group_742		DUF1364 domain-containing protein	1	1305	Prophage	prophage_not_in_circular_genomes									CIP54_105__1953__Austria__Unknown
group_741		Uncharacterized protein gp26	1	1306	Prophage	prophage_not_in_circular_genomes									45-88__1988__France__Human
group_734		hypothetical protein	1	1307	none
group_733		Uncharacterized protein gp25	1	1308	Prophage	prophage_not_in_circular_genomes									45-88__1988__France__Human
group_718		Prophage protein	1	1309	Prophage	prophage_not_in_circular_genomes									CIP54_105__1953__Austria__Unknown
group_717		hypothetical protein	1	1310	Prophage	prophage_not_in_circular_genomes									45-88__1988__France__Human
group_701		Putative transposase	1	1311	tnp	tnp
group_700		hypothetical protein	1	1312	none
group_686		hypothetical protein	1	1314	none
group_677		ClpX-type ZB domain-containing protein	1	1316	Prophage						CP147907_1905703_1906041
group_663		hypothetical protein	1	1317	Prophage	prophage_not_in_circular_genomes									CIP54_105__1953__Austria__Unknown
tnpB	tnpB	IS66 family insertion sequence element accessory protein TnpB	1	1318	tnp	tnp
group_651		Tail tube protein	1	1319	Prophage	prophage_not_in_circular_genomes									45-88__1988__France__Human
group_646		hypothetical protein	1	1320	none
group_645		DUF2591 domain-containing protein	1	1321	Prophage	prophage_not_in_circular_genomes									493366__2018__UKOrElsewhere__Human
group_638		Uncharacterized protein gp19	1	1323	Prophage	prophage_not_in_circular_genomes									45-88__1988__France__Human
group_633		HNH endonuclease	1	1324	Prophage	prophage_not_in_circular_genomes									CIP54_105__1953__Austria__Unknown
group_622		peptidase M15	1	1325	Prophage	prophage_not_in_circular_genomes									CIP54_105__1953__Austria__Unknown
group_616		DUF5375 domain-containing protein	1	1326	none
group_615		hypothetical protein	1	1327	none
group_614		Putative phage holin	1	1328	Prophage						CP147907_1914994_1915380
group_613		putative spanin inner membrane subunit	1	1329	Prophage	prophage_not_in_circular_genomes									45-88__1988__France__Human
group_612		hypothetical protein	1	1330	none
mor	mor	Middle operon regulator	1	1331	Prophage	prophage_not_in_circular_genomes									45-88__1988__France__Human
group_606		Holin	1	1332	Prophage	prophage_not_in_circular_genomes									CIP54_105__1953__Austria__Unknown
group_605		Uncharacterized zinc-type alcohol dehydrogenase-like protein YahK	1	1333	none
group_604		hypothetical protein	1	1334	none
group_603		tRNA-synt-1g domain-containing protein	1	1335	Prophage	prophage_not_in_circular_genomes									CIP54_105__1953__Austria__Unknown
group_593		reverse transcriptase domain-containing protein	1	1336	none
group_590		Protein phosphatase CheZ	1	1337	none
group_589		Uncharacterized protein gp35	1	1338	Prophage	prophage_not_in_circular_genomes									45-88__1988__France__Human
group_586		hypothetical protein	1	1339	none
group_584		hypothetical protein	1	1340	Prophage						CP147907_1937594_1938007
group_580		DUF2513 domain-containing protein	1	1341	Prophage	prophage_not_in_circular_genomes									45-88__1988__France__Human
group_578		Uncharacterized protein gp8	1	1342	Prophage	prophage_not_in_circular_genomes									45-88__1988__France__Human
group_577		transcriptional regulator	1	1343	none
group_575		DUF977 domain-containing protein	1	1344	Prophage	prophage_not_in_circular_genomes									CIP54_105__1953__Austria__Unknown
group_574		Late transcription activator C	1	1345	Prophage	prophage_not_in_circular_genomes									45-88__1988__France__Human
group_570		tellurite/colicin resistance protein	1	1346	Prophage	prophage_not_in_circular_genomes									CIP54_105__1953__Austria__Unknown
insE	insE	Transposase InsE and inactivated derivatives	1	1347	tnp	tnp
group_569		Gene product J	1	1348	Prophage	prophage_not_in_circular_genomes									45-88__1988__France__Human
group_567		hypothetical protein	1	1349	none
group_565		hypothetical protein	1	1350	none
group_562		putative tail assembly protein gp41	1	1351	Prophage	prophage_not_in_circular_genomes									45-88__1988__France__Human
group_561		hypothetical protein	1	1352	none
group_558		Lysozyme	1	1353	Prophage	prophage_not_in_circular_genomes									493366__2018__UKOrElsewhere__Human
group_557		Baseplate protein gp46	1	1354	Prophage	prophage_not_in_circular_genomes									45-88__1988__France__Human
group_556		hypothetical protein	1	1355	none
group_553		hypothetical protein	1	1356	Prophage	prophage_not_in_circular_genomes									CIP54_105__1953__Austria__Unknown
group_552		hypothetical protein	1	1357	Prophage	prophage_not_in_circular_genomes									CIP54_105__1953__Austria__Unknown
group_548		hypothetical protein	1	1358	Prophage	prophage_not_in_circular_genomes									CIP54_105__1953__Austria__Unknown
group_547		hypothetical protein	1	1359	Prophage	prophage_not_in_circular_genomes									CIP54_105__1953__Austria__Unknown
group_544		selenium binding protein	1	1360	none
group_543		hypothetical protein	1	1361	none
group_537		putative HTH-type transcriptional regulator LeuO	1	1362	none
group_529		Prok-JAB domain-containing protein	1	1363	none
group_523		terminase	1	1364	Prophage	prophage_not_in_circular_genomes									493366__2018__UKOrElsewhere__Human
group_522		hypothetical protein	1	1365	none
group_517		transcriptional regulator	1	1367	Prophage	prophage_not_in_circular_genomes									CIP54_105__1953__Austria__Unknown
group_509		hypothetical protein	1	1368	Prophage	prophage_not_in_circular_genomes									CIP54_105__1953__Austria__Unknown
group_508		phage virion morphogenesis protein	1	1369	Prophage	prophage_not_in_circular_genomes									45-88__1988__France__Human
group_504		LPD29 domain-containing protein	1	1370	none
group_499	lptA	lipopolysaccharide transport periplasmic protein LptA	1	1372	none
group_498		hypothetical protein	1	1373	none
group_495		HNH domain-containing protein	1	1374	none
group_491		hypothetical protein	1	1375	none
group_484		DNA-binding protein	1	1376	Prophage	prophage_not_in_circular_genomes									493366__2018__UKOrElsewhere__Human
group_477		SAR-endolysin	1	1377	Prophage	prophage_not_in_circular_genomes									493366__2018__UKOrElsewhere__Human
group_470		Poly(A) polymerase	1	1378	none
group_469		hypothetical protein	1	1379	none
group_464		hypothetical protein	1	1380	none
lys	lys	SAR-endolysin	1	1381	Prophage	prophage_not_in_circular_genomes									45-88__1988__France__Human
group_460		antiterminator	1	1382	Prophage	prophage_not_in_circular_genomes									493366__2018__UKOrElsewhere__Human
gam	gam	Putative DNA ends protecting protein gam	1	1383	Prophage	prophage_not_in_circular_genomes									45-88__1988__France__Human
repc	repc	Repressor c protein	1	1384	Prophage	prophage_not_in_circular_genomes									45-88__1988__France__Human
group_457		toxin-activating lysine-acyltransferase	1	1385	none
group_456		phage tail protein	1	1386	Prophage	prophage_not_in_circular_genomes									45-88__1988__France__Human
group_454		Uncharacterized protein gp12	1	1387	Prophage	prophage_not_in_circular_genomes									45-88__1988__France__Human
group_453		Uncharacterized protein gp11	1	1388	Prophage	prophage_not_in_circular_genomes									45-88__1988__France__Human
group_448		hypothetical protein	1	1389	none
group_446		Tail fiber assembly protein U'	1	1390	Prophage	prophage_not_in_circular_genomes									45-88__1988__France__Human
group_438		DUF551 domain-containing protein	1	1392	Prophage	prophage_not_in_circular_genomes									CIP54_105__1953__Austria__Unknown
group_433		antiterminator	1	1393	Prophage	prophage_not_in_circular_genomes									CIP54_105__1953__Austria__Unknown
group_432		Baseplate protein gp48	1	1394	Prophage	prophage_not_in_circular_genomes									45-88__1988__France__Human
group_430		DUF2514 domain-containing protein	1	1395	none
group_429		phage tail protein	1	1396	Prophage	prophage_not_in_circular_genomes									CIP54_105__1953__Austria__Unknown
group_428		Putative antirestriction protein KlcA	1	1397	none
group_422		putative tail terminator protein	1	1398	Prophage	prophage_not_in_circular_genomes									45-88__1988__France__Human
gemA	gemA	GemA protein	1	1399	Prophage	prophage_not_in_circular_genomes									45-88__1988__France__Human
group_420		hypothetical protein	1	1400	none
group_404		Putative membrane protein	1	1401	Prophage	prophage_not_in_circular_genomes									CIP54_105__1953__Austria__Unknown
group_402		Chaperone protein DnaJ	1	1402	none
group_398		putative terminase small subunit gp27	1	1404	Prophage	prophage_not_in_circular_genomes									45-88__1988__France__Human
group_397		tail fiber assembly protein	1	1405	Prophage_Annotation
group_388		hypothetical protein	1	1407	none
group_387		hypothetical protein	1	1408	none
group_383		hypothetical protein	1	1409	none
gin	gin	Serine recombinase gin	1	1410	Prophage	prophage_not_in_circular_genomes									45-88__1988__France__Human
group_380		Baseplate puncturing device gp45	1	1411	Prophage	prophage_not_in_circular_genomes									45-88__1988__France__Human
group_378		hypothetical protein	1	1412	none
group_376		DUF1367 domain-containing protein	1	1413	Prophage	prophage_not_in_circular_genomes									CIP54_105__1953__Austria__Unknown
group_371		Protein ninG	1	1414	Prophage	prophage_not_in_circular_genomes									493366__2018__UKOrElsewhere__Human
group_369		hypothetical protein	1	1415	Prophage	prophage_not_in_circular_genomes									CIP54_105__1953__Austria__Unknown
group_368		hypothetical protein	1	1416	Prophage	prophage_not_in_circular_genomes									CIP54_105__1953__Austria__Unknown
group_361		hypothetical protein	1	1417	Prophage	prophage_not_in_circular_genomes									CIP54_105__1953__Austria__Unknown
group_359		hypothetical protein	1	1418	none
group_357		hypothetical protein	1	1419	none
group_348		hypothetical protein	1	1420	none
group_343		DUF2726 domain-containing protein	1	1421	none
group_335		protein disulfide oxidoreductase DsbA	1	1423	none
group_330		hypothetical protein	1	1424	Prophage	prophage_not_in_circular_genomes									CIP54_105__1953__Austria__Unknown
mom	mom	Methylcarbamoylase mom	1	1425	Prophage	prophage_not_in_circular_genomes									45-88__1988__France__Human
group_297		phage baseplate protein	1	1426	Prophage	prophage_not_in_circular_genomes									CIP54_105__1953__Austria__Unknown
group_295		hypothetical protein	1	1427	none
group_294		hypothetical protein	1	1428	none
group_278		Protein phosphatase from phage origin	1	1429	Prophage	prophage_not_in_circular_genomes									CIP54_105__1953__Austria__Unknown
group_273		Small subunit bacteriophage terminase	1	1430	Prophage_Annotation
group_264		septation initiation protein	1	1431	none
group_263		DUF1627 domain-containing protein	1	1432	Prophage	prophage_not_in_circular_genomes									CIP54_105__1953__Austria__Unknown
group_261		Protein kinase from phage origin	1	1433	Prophage	prophage_not_in_circular_genomes									CIP54_105__1953__Austria__Unknown
group_250		DDE-Tnp-1 domain-containing protein	1	1434	none
group_246		hypothetical protein	1	1435	none
group_232		hypothetical protein	1	1437	none
ymdB	ymdB	phage tail protein	1	1438	Prophage_Annotation
group_228		hypothetical protein	1	1439	Prophage	prophage_not_in_circular_genomes									CIP54_105__1953__Austria__Unknown
group_221		Ybl159	1	1440	none
group_220		hypothetical protein	1	1441	none
group_195		hypothetical protein	1	1443	none
group_189		Major capsid protein	1	1444	Prophage	prophage_not_in_circular_genomes									45-88__1988__France__Human
group_187		DNA-binding protein	1	1445	none
group_181		ATP-dependent target DNA activator B	1	1446	Prophage	prophage_not_in_circular_genomes									45-88__1988__France__Human
group_180		hypothetical protein	1	1447	none
group_179		hypothetical protein	1	1448	Prophage	prophage_not_in_circular_genomes									CIP54_105__1953__Austria__Unknown
group_178		Mrr-cat domain-containing protein	1	1449	none
group_176		hypothetical protein	1	1450	none
group_165		phage tail protein	1	1451	Prophage	prophage_not_in_circular_genomes									45-88__1988__France__Human
group_156		hypothetical protein	1	1452	Prophage	prophage_not_in_circular_genomes									CIP54_105__1953__Austria__Unknown
group_151		Site-specific DNA-methyltransferase (adenine-specific)	1	1453	none
group_148		hypothetical protein	1	1454	Prophage	prophage_not_in_circular_genomes									CIP54_105__1953__Austria__Unknown
group_145		DUF2184 domain-containing protein	1	1455	none
dpiB	dpiB	sensor histidine kinase DpiB	1	1456	Prophage	prophage_not_in_circular_genomes									CIP54_105__1953__Austria__Unknown
group_141		nucleotidyltransferase	1	1457	none
group_140		hypothetical protein	1	1458	none
group_132		SAVED domain-containing protein	1	1459	none
group_130		integrase	1	1460	Prophage_Annotation
group_128		Baseplate protein gp47	1	1461	Prophage	prophage_not_in_circular_genomes									45-88__1988__France__Human
group_127		Protease I	1	1462	Prophage	prophage_not_in_circular_genomes									45-88__1988__France__Human
group_117		Terminase small subunit	1	1463	Prophage	prophage_not_in_circular_genomes									CIP54_105__1953__Austria__Unknown
group_115		Lipopolysaccharide 12-N-acetylglucosaminetransferase	1	1464	none
group_110		type I restriction endonuclease subunit R	1	1465	Prophage	prophage_not_in_circular_genomes									CIP54_105__1953__Austria__Unknown
group_108		Baseplate hub protein gp44	1	1466	Prophage	prophage_not_in_circular_genomes									45-88__1988__France__Human
group_94		Baseplate J-like protein	1	1467	Prophage	prophage_not_in_circular_genomes									CIP54_105__1953__Austria__Unknown
group_93		Baseplate J-like protein	1	1468	Prophage_Annotation
fimB	fimB	integrase	1	1469	Prophage_Annotation
intR	intR	Prophage integrase IntR	1	1470	Prophage_Annotation
group_87		integrase	1	1471	none
group_78		Putative capsid assembly protein F	1	1472	Prophage	prophage_not_in_circular_genomes									45-88__1988__France__Human
group_77		NUDIX hydrolase	1	1473	Prophage	prophage_not_in_circular_genomes									CIP54_105__1953__Austria__Unknown
group_75		terminase	1	1474	Prophage	prophage_not_in_circular_genomes									CIP54_105__1953__Austria__Unknown
group_74		Terminase	1	1475	Prophage_Annotation
group_73		hypothetical protein	1	1476	Prophage	prophage_not_in_circular_genomes									CIP54_105__1953__Austria__Unknown
group_65		hypothetical protein	1	1477	none
group_64		hypothetical protein	1	1478	none
group_63		phage tail protein	1	1479	Prophage	prophage_not_in_circular_genomes									45-88__1988__France__Human
group_61		DUF1073 domain-containing protein	1	1480	none
group_58		DUF1073 domain-containing protein	1	1481	Prophage	prophage_not_in_circular_genomes									CIP54_105__1953__Austria__Unknown
group_57		terminase	1	1482	Prophage	prophage_not_in_circular_genomes									493366__2018__UKOrElsewhere__Human
group_52		DNA circularization protein N	1	1483	Prophage	prophage_not_in_circular_genomes									45-88__1988__France__Human
group_51		Tail sheath protein	1	1484	Prophage	prophage_not_in_circular_genomes									45-88__1988__France__Human
group_46		Portal protein	1	1485	Prophage	prophage_not_in_circular_genomes									45-88__1988__France__Human
group_45		Phage tail protein	1	1486	Prophage	prophage_not_in_circular_genomes									CIP54_105__1953__Austria__Unknown
group_41		AAA family ATPase	1	1487	none
tnpIS66	tnp-IS66	IS66 family transposase	1	1489	tnp	tnp
group_38		NUDIX hydrolase	1	1490	none
group_37		ATP-dependent helicase	1	1491	none
group_36		ShlB/FhaC/HecB family hemolysin secretion/activation protein	1	1492	none
group_35		putative terminase large subunit gp28	1	1493	Prophage	prophage_not_in_circular_genomes									45-88__1988__France__Human
group_32		Tail fiber protein	1	1494	Prophage_Annotation
group_28		thiamine biosynthesis protein ThiF	1	1495	none
group_27		DUF2326 domain-containing protein	1	1496	none
group_21		lytic transglycosylase	1	1497	Prophage	prophage_not_in_circular_genomes									CIP54_105__1953__Austria__Unknown
group_20		transposase	1	1498	tnp	tnp
group_17		hypothetical protein	1	1499	none
group_16		putative tape measure protein	1	1500	Prophage	prophage_not_in_circular_genomes									45-88__1988__France__Human
group_14		AAA-13 domain-containing protein	1	1501	none
group_13		Site-specific DNA-methyltransferase (adenine-specific)	1	1502	none
clpA	clpA	ATP-dependent Clp protease ATP-binding subunit ClpA	1	1503	none
group_8		alkaline-shock protein	1	1504	none
group_2		invasin	1	1505	none
group_0		Filamentous hemagglutinin N-terminal domain-containing protein	1	1506	none
